# 1 Quantifying the Influence of Mutation Detection on 2 Tumour Subclonal Reconstruction

3 **Lydia Y. Liu**<sup>1,2,3,4,5,6,†</sup>, **Vinayak Bhandari**<sup>1,†</sup>, **Adriana Salcedo**<sup>1,4,5,6,7</sup>, **Shadrielle M. G.**  
4 **Espiritu**<sup>7</sup>, **Quaid D. Morris**<sup>3,8,9,10</sup>, **Thomas Kislinger**<sup>1,2</sup>, **Paul C. Boutros**<sup>1,3,4,5,6,11,12,\*</sup>

5  
6 <sup>1</sup> Department of Medical Biophysics, University of Toronto, Toronto, ON M5G 1L7, Canada

7 <sup>2</sup> Princess Margaret Cancer Centre, University Health Network, Toronto, ON M5G 2C1, Canada

8 <sup>3</sup> Vector Institute for Artificial Intelligence, Toronto, ON M5G 1M1, Canada

9 <sup>4</sup> Department of Human Genetics, University of California, Los Angeles, Los Angeles, California, 90095

10 <sup>5</sup> Jonsson Comprehensive Cancer Centre, University of California, Los Angeles, Los Angeles, California, 90095

11 <sup>6</sup> Institute for Precision Health, University of California, Los Angeles, Los Angeles, California, 90095

12 <sup>7</sup> Ontario Institute for Cancer Research, Toronto, ON M5G 0A3, Canada

13 <sup>8</sup> Department of Computer Science, University of Toronto, Toronto, ON M5T 3A1, Canada

14 <sup>9</sup> Department of Molecular Genetics, University of Toronto, Toronto, ON M5S 1A8, Canada

15 <sup>10</sup> Donnelly Centre for Cellular and Biomolecular Research, University of Toronto, Toronto, ON M5S 3E1, Canada

16 <sup>11</sup> Department of Pharmacology and Toxicology, University of Toronto, Toronto, ON M5S 1A8, Canada

17 <sup>12</sup> Department of Urology, University of California, Los Angeles, Los Angeles, California, 90095

18 \* Corresponding author

19 † These authors contributed equally to this work

## 21 Address for correspondence:

22 Dr. Paul C. Boutros

23 12-109 CHS

24 10833 Le Conte Avenue

25 Los Angeles, California

26 90095

27 Email: [pboutros@mednet.ucla.edu](mailto:pboutros@mednet.ucla.edu)

28 Phone: 310-794-7160

## 29 **Abstract**

30 Whole-genome sequencing can be used to estimate subclonal populations in tumours and this  
31 intra-tumoural heterogeneity is linked to clinical outcomes. Many algorithms have been  
32 developed for subclonal reconstruction, but their variabilities and consistencies are largely  
33 unknown. We evaluated sixteen pipelines for reconstructing the evolutionary histories of 293  
34 localized prostate cancers from single samples, and eighteen pipelines for the reconstruction of  
35 10 tumours with multi-region sampling. We show that predictions of subclonal architecture and  
36 timing of somatic mutations vary extensively across pipelines. Pipelines show consistent types of  
37 biases, with those incorporating SomaticSniper and Battenberg preferentially predicting  
38 homogenous cancer cell populations and those using MuTect tending to predict multiple  
39 populations of cancer cells. Subclonal reconstructions using multi-region sampling confirm that  
40 single-sample reconstructions systematically underestimate intra-tumoural heterogeneity,  
41 predicting on average fewer than half of the cancer cell populations identified by multi-region  
42 sequencing. Overall, these biases suggest caution in interpreting specific architectures and  
43 subclonal variants.

44

## 45 **Introduction**

46 Understanding tumour heterogeneity and subclonal architecture is important for the elucidation  
47 of the mutational and evolutionary processes underlying tumorigenesis and treatment resistance<sup>1-</sup>  
48 <sup>4</sup>. Many studies of tumour heterogeneity have focused on small patient cohorts with multi-region  
49 sequencing<sup>5-11</sup>. This study design allows the reconstruction of sample trees that illustrate the  
50 relationships between multiple primary and metastatic lesions using shared and private  
51 mutations<sup>6,11</sup>. Despite their small sample sizes, these studies have provided remarkable insight,  
52 demonstrating multiple subclones within a single tumour, clonal relationships between primary  
53 and metastatic tumours and evidence for multiple primary tumours within a single patient. Many  
54 studies have further delved into intra-tumoural heterogeneity and constructed clone trees that  
55 demonstrate the phylogenetic relationship between cancer cell populations that are shared or  
56 unique between lesions<sup>5,7,9,12</sup>. The latter analyses not only provide insight to the convergent and  
57 branching evolution of cancer, but also characterize cancer cell migration and highlight the  
58 subclonal complexity within individual lesions.

59 Some studies have applied these techniques to large cohorts of single-region tumour whole  
60 genomes. For example, we reconstructed the subclonal architectures of 293 localized prostate  
61 cancers using whole-genome sequencing (WGS) of a single region of the index lesion<sup>13</sup>. The  
62 larger sample sizes of single-region studies allow the identification of mutational events that are  
63 biased to occur at specific times during tumour development. Single-region subclonal  
64 reconstruction studies have also suggested that patients with less subclonal diversity (*e.g.* with  
65 only a single detectable population of cancer cells; termed *monoclonal*) tend to have superior  
66 clinical outcomes compared to those with more subclonal diversity (*e.g.* those with highly  
67 *polyclonal* tumours)<sup>13</sup>.

68 A variety of algorithms have been developed to reconstruct the subclonal architecture of cancers  
69 from single-region or multi-region bulk DNA sequencing data<sup>14-21</sup>. These algorithms broadly  
70 attempt to infer cancer cell populations based on cancer cell fractions (the fraction of cancer cells  
71 in which each variant is present) of somatic single nucleotide variants (SNVs) and/or somatic  
72 copy number aberrations (CNAs). Several employ Bayesian models to cluster mutations, and  
73 estimate the number and prevalence of cancer cell populations<sup>15-17,20,22</sup>. Some algorithms are  
74 further able to infer phylogenetic clone trees, thus resolving the evolutionary relationship

75 between mutation clusters<sup>15,21</sup>. However, there has not been a systematic comparison of the  
76 features and consistencies of their reconstructions on a large dataset. It is thus unclear to what  
77 extent these pipelines agree on large cohorts of real data, whether specific pipelines are biased  
78 towards certain types of reconstructions, and to what degree reconstruction results are influenced  
79 by the somatic mutation inputs. It is further unclear to what extent single-sample reconstructions  
80 differ from multi-region reconstructions, raising questions on the magnitude of underestimation  
81 present in large-cohort studies.

82 To address these gaps in the field, we evaluated pipelines consisting of twenty-two different  
83 combinations of well-established and independent SNV detection tools, subclonal CNA  
84 detection tools and subclonal reconstruction algorithms. Sixteen pipelines were applied to a set  
85 of 293 high-depth tumour-normal pairs<sup>13,23</sup> and eighteen were applied to 10 tumours with multi-  
86 region sequencing<sup>8,24</sup>. Our analyses reveal consistent biases and extensive differences across  
87 subclonal reconstruction pipelines in the predictions of subclonal architecture, identification and  
88 timing of variants and influence on downstream analyses. We also quantify the extent that  
89 single-region reconstructions underestimate intra-tumour heterogeneity as compared to  
90 reconstructions based on multiple regions of the tumour. Together, these findings generate  
91 guidance for the community and provide a resource for improving existing methods and  
92 benchmarking new ones.

## 93 **Results**

### 94 **Overview and Summary of Pipeline Runs**

95 We reconstructed the subclonal architectures of 293 primary localized prostate tumours using  
96 sixteen pipelines (**Figure 1, Supplementary Data 1-20**). Each patient had WGS of a single  
97 region taken from the index lesion (**Methods**) that was macro-dissected to > 70% tumour  
98 cellularity (mean coverage  $\pm$  standard deviation [SD]:  $63.9 \pm 16.7$ ) and WGS of matched blood  
99 reference tissue (mean coverage  $\pm$  SD:  $41.2 \pm 9.0$ ), as reported previously<sup>13</sup>. To investigate the  
100 influence of variant detection on subclonal reconstruction, we detected CNAs using Battenberg  
101 and TITAN<sup>7,25</sup> and SNVs using SomaticSniper and MuTect<sup>26,27</sup>. We then used the CNAs and  
102 SNVs detected by these tools in factorial combinations as inputs for four widely-used subclonal  
103 reconstruction algorithms: PhyloWGS<sup>15</sup>, DPCLust<sup>16</sup>, PyClone<sup>17</sup> and SciClone<sup>20</sup>. Each subclonal  
104 reconstruction pipeline was thus composed of three algorithms: a SNV detection tool, a  
105 subclonal CNA detection tool and a subclonal reconstruction algorithm. Thus “PhyloWGS-  
106 comprising pipelines” refers to all pipelines that use PhyloWGS as the subclonal reconstruction  
107 algorithm, in combination with any SNV and CNA detection tool. All subclonal reconstruction  
108 solutions were subjected to the same post-processing heuristics to minimize bias (**Methods**). We  
109 further quantified the variability that arises in subclonal reconstruction from spatially sampling  
110 the same tumour, focusing on ten tumours with multi-region WGS (2-4 regions per tumour, total  
111 of 30 regions)<sup>8,24</sup>. Multi-region WGS samples were further assessed using FACETS<sup>28</sup> for  
112 subclonal CNA detection, and subclonal reconstruction was performed both with all regions  
113 together and with each region individually using PhyloWGS, PyClone and SciClone.

114 Across all samples and pipelines, we attempted to execute 5408 subclonal reconstructions. Of  
115 these, 4447 (82.2%) successfully completed their execution (**Supplementary Table 1**). Among  
116 pipelines for the single-region subclonal reconstruction of 293 tumours, those using DPCLust  
117 achieved the lowest failure rates (mean  $\pm$  SD:  $1.4\% \pm 1.5\%$ ), followed by those using PhyloWGS  
118 ( $2.2\% \pm 1.3\%$ ), PyClone ( $16.3\% \pm 9.8\%$ ) and SciClone ( $41.2\% \pm 22.4\%$ ; **Supplementary**  
119 **Figure 1A**). The primary reasons of failure for pipelines using DPCLust and PhyloWGS were  
120 excessive memory requirements (> 250 GB RAM) or run-time (> 3 months). Lack of input  
121 SNVs was the largest failure reason for pipelines using PyClone and SciClone, as PyClone  
122 exclusively leverage SNVs from clonal CNA regions and SciClone utilizes SNVs in copy

123 number neutral regions. Since we used CNA detection tools that identified subclonal variation, in  
124 some cases insufficient clonal CNA regions were available. Post-processing heuristics also  
125 contributed to reconstruction failures across pipelines (**Methods**).

126 Multi-region reconstructions with pipelines using PhyloWGS had the lowest failure rates on the  
127 10 tumours evaluated (mean failure rate  $\pm$  SD: 5.0%  $\pm$  5.5%), followed by PyClone (45.0%  $\pm$   
128 26.6%) and SciClone (93.3%  $\pm$  10.7%; **Supplementary Figure 1B**). Reasons of failure for  
129 pipelines using PhyloWGS include lack of shared CNAs between samples from the same tumour  
130 and prediction of poly-tumour architectures (*i.e.*, multiple independent primary tumours;  
131 **Methods**). PyClone leverages SNVs in clonal CNA regions that are shared between all samples  
132 from the same tumour for multi-region reconstructions and had higher failure rates. Due to  
133 similar requirements for SciClone that all SNVs be in copy number neutral regions and shared  
134 between all samples from the tumour, multi-region reconstructions using SciClone only  
135 succeeded in four cases overall and were excluded from further multi-region reconstruction  
136 analyses.

### 137 **Consistency of Subclonal Reconstruction from Single Samples**

138 To evaluate subclonal reconstruction solutions for 293 single-region tumours, we first compared  
139 tumour cellularity (sometimes called “tumour purity”) estimates across subclonal reconstruction  
140 pipelines. Cellularity estimates from CNA detection tools are inputs to PhyloWGS, PyClone and  
141 DPCLust, and as expected predicted cellularity from pipelines using these algorithms correlated  
142 with those from the CNA detection tool used (TITAN: 0.212–0.623, Battenberg: 0.588–0.876,  
143 Spearman’s  $\rho$ ; **Figure 2A-B**). By contrast, SciClone predicts sample cellularity using orthogonal  
144 evidence (VAF of SNVs in copy number neutral regions). SciClone-estimated cellularity in  
145 pipelines using SomaticSniper correlated better with estimates from CNA detection tools  
146 (SomaticSniper-TITAN-SciClone *vs.* TITAN: 0.363, SomaticSniper-Battenberg-SciClone *vs.*  
147 Battenberg: 0.670, Spearman’s  $\rho$ ) than did pipelines using MuTect (MuTect-TITAN-SciClone  
148 *vs.* TITAN: 0.035, MuTect-Battenberg-SciClone *vs.* Battenberg: 0.348, Spearman’s  $\rho$ ). This  
149 suggests that the VAFs of SNVs detected by MuTect have biased subclone cellular prevalence  
150 estimates. Pipeline-estimated cellularity by pipelines using PhyloWGS, PyClone and DPCLust  
151 also dropped dramatically in correlation with CNA detection tool estimated cellularity once the  
152 latter reached 0.75 (TITAN: -0.478–(-)0.163, Battenberg: -0.396–(-)0.021, Spearman’s  $\rho$ ). This

153 appears to lead to the anecdotal observation that high cellularity results from both Battenberg and  
154 TITAN could reflect unsuccessful CNA detection, and should be interpreted with caution and  
155 perhaps supported by orthogonal evidence. Finally, Battenberg- and TITAN-estimated  
156 cellularities showed poor correlation with each other (0.235, Spearman's  $\rho$ ). As a result, in 12/12  
157 pipelines using either PhyloWGS, PyClone or DPCLust, changing the CNA detection tool  
158 influenced cellularity estimates more than changing the SNV detection tool.

159 We next assessed if subclonal reconstruction pipelines differed in the number of subclones they  
160 predict. For each of the 293 tumours evaluated, up to 16 subclonal reconstruction pipelines were  
161 successfully executed, with a median of 14 successful executions (25<sup>th</sup> quantile [Q1]: 12, 75<sup>th</sup>  
162 quantile [Q3]: 16). Across samples, a median of 7/16 pipelines agreed on the number of  
163 subclones predicted (Q1: 6; Q3: 8). The median tumour was predicted to harbor one to three  
164 subclones across pipelines (lower range Q1: 1, Q3: 1; upper range Q1: 3, Q3: 5), and two  
165 randomly-selected successfully-executed pipelines would differ by  $1.1 \pm 1.3$  (mean  $\pm$  SD) in  
166 their predicted number of subclones across samples. These variabilities reflect substantial  
167 differences between subclonal reconstruction pipelines. Further, no pair of subclonal  
168 reconstruction algorithms consistently produced more similar results across mutation detection  
169 tool combinations. Pipelines using SomaticSniper for SNV detection achieved higher levels of  
170 agreement across subclonal reconstruction algorithms. All successfully-executed algorithms  
171 estimated the same number of subclones in 59.8% of samples in pipelines using SomaticSniper  
172 and Battenberg, and in 29.3% of samples in pipelines using SomaticSniper and TITAN, though  
173 the agreements were largely driven by concordant monoclonal reconstructions (**Figure 3A-B**).  
174 Pipelines using MuTect had much lower levels of agreement across subclonal reconstruction  
175 algorithms in pipelines using the same mutation detection tool combination (MuTect-Battenberg:  
176 21.5%, MuTect-TITAN: 12.4%; **Figure 3C-D**), although these results suggest pipelines using  
177 SomaticSniper may systematically underestimate subclonal complexity.

178 To better understand the contribution of mutation detection tools to the discordance in predicted  
179 subclonal architectures across pipelines, we compared clonality solutions between pipelines  
180 using the same subclonal reconstruction algorithm across mutation detection tool combinations.  
181 There are strong interactions between mutation detection tools; for example, predictions by the  
182 SomaticSniper-Battenberg-PhyloWGS pipeline agreed poorly with predictions made by other  
183 pipelines using PhyloWGS (**Supplementary Figure 2A**). Agreement was highest between the

184 two pipelines using MuTect due to the high number of polyclonal solutions. This overall trend  
185 was replicated in pipelines using PyClone, where the SomaticSniper-Battenberg-PyClone  
186 pipeline had high agreement with the SomaticSniper-TITAN-PyClone pipeline but differed from  
187 pipelines using MuTect (**Supplementary Figure 2B**). DPCLust-comprising pipelines using  
188 MuTect also predicted high numbers of polyclonal architectures and showed low agreements  
189 with other pipelines (**Supplementary Figure 2C**). Finally, results were similar for pipelines  
190 using SciClone, with pipelines using the same SNV detection tools achieving the highest  
191 agreement (**Supplementary Figure 2D**).

192 As PhyloWGS is the only one of the four subclonal reconstruction algorithms evaluated that  
193 predicts the evolutionary relationship between subclones, we compared the phylogenetic clone  
194 trees for each sample as predicted by PhyloWGS-comprising pipelines (**Supplementary Figure**  
195 **3A**). The most frequently predicted polyclonal architecture was the bi-clonal tree, accounting for  
196  $69.8 \pm 25.4\%$  (mean  $\pm$  SD) of polyclonal solutions across pipelines. As multiple phylogenetic  
197 clone trees can be inferred from the same data<sup>2,29</sup>, we evaluated prediction stability across the  
198 2,500 Markov chain Monte Carlo (MCMC) iterations of PhyloWGS after burn-in  
199 (**Supplementary Figure 3B-E**). Most samples alternated between  $1.9 \pm 1.2$  (mean  $\pm$  SD)  
200 solutions. In 100% of the cases with an alternative phylogeny, the solution alternated at least  
201 once between phylogenetic clone trees with different numbers of subclones. Further, when  
202 PhyloWGS wavered between solutions that only differed in tree structures (not number of  
203 subclones), two alternatives dominated ( $2.1 \pm 0.3$ , mean  $\pm$  SD). These data suggest that the  
204 uncertainty in phylogenetic clone tree reconstruction comes from the combination of uncertainty  
205 from estimating subclone number and resolving their evolutionary relationships.

206 Taking the consensus across mutation detection tools is a common approach for increasing  
207 confidence in mutation detection<sup>30</sup>. We evaluated how subclonal architectures predicted by  
208 PhyloWGS-comprising pipelines change when using the union and intersection of detected  
209 mutations (**Methods**). MuTect detected significantly more unique SNVs than SomaticSniper  
210 (median<sub>Unique SNVs, MuTect</sub> = 5,330, median<sub>Unique SNVs, SomaticSniper</sub> = 623,  $p < 2.2 \times 10^{-16}$ , Wilcoxon  
211 signed-rank test; **Supplementary Figure 4A**). CNAs detected by TITAN and Battenberg were  
212 also substantially imbalanced, with a median of 50.2% and 1.2% of the covered genome having  
213 uniquely detected CNAs across samples, respectively ( $p < 2.2 \times 10^{-16}$ , Wilcoxon signed-rank test;  
214 **Supplementary Figure 4B**). The pipeline using the union of SNVs and the intersect of CNAs



215 predicted clonality with similar skew to the pipeline using the union of both SNVs and CNAs,  
216 and the pipeline using the intersection of SNVs and union of CNAs predicted clonality with  
217 similar balance to the pipeline using the intersect of both SNVs and CNAs (**Supplementary**  
218 **Figure 4C-F**). This is consistent with our observation that pipeline predictions of complex  
219 polyclonal phylogenies using PhyloWGS are primarily driven by large numbers of SNVs  
220 detected by MuTect, and complexity in CNAs has a smaller influence on the delineation of  
221 cancer cell populations.

222 Considering the strong influence of SNV detection tools on the number of subclones predicted,  
223 we investigated the VAFs and trinucleotide profiles of SNVs detected by MuTect and  
224 SomaticSniper. Across all 293 WGS tumour-normal pairs, MuTect-unique SNVs had  
225 significantly lower VAFs than those detected only by SomaticSniper or by both tools  
226 ( $\text{median}_{\text{VAF, MuTect-Unique}} = 9.8\%$ ,  $\text{median}_{\text{VAF, SomaticSniper-Unique}} = 24.0\%$ ,  $\text{median}_{\text{VAF, Intersect}} = 28.3\%$ ;  
227 both  $p < 2.2 \times 10^{-16}$ , Mann-Whitney U-test; **Figure 4A**). This supports the finding that the  
228 prediction of a higher number of cancer cell populations is associated with higher numbers of  
229 input SNVs with ranging VAFs<sup>15</sup>. SNVs detected by both tools exhibited a trinucleotide profile  
230 characterized by Np[C>T]G mutations, while a higher proportion of SomaticSniper-unique  
231 SNVs were T>C and MuTect-unique SNVs were characterized by a high proportion of C>A  
232 mutations, especially C[C>A]G and T[C>A]G (**Figure 4B-D**). This is suggestive of error  
233 profiles related to sequencing or alignment artefacts<sup>31</sup>. As all SNVs detected by SomaticSniper  
234 and MuTect were subjected to allow- and deny-list filtering<sup>13,23</sup> prior to subclonal reconstruction  
235 (**Methods**), we also evaluated the effect of filtering on VAFs and trinucleotide profiles. In  
236 general, filtering removed low-VAF SNVs, but minimally influenced trinucleotide mutational  
237 profiles (**Supplementary Figure 5A-E**).

### 238 **Consistency of SNV Clonality**

239 One goal of subclonal reconstruction is to time when individual mutations occurred during  
240 tumour evolution. We therefore compared clonal and subclonal SNV identification for the same  
241 set of 293 WGS samples across sixteen pipelines for subclonal reconstruction. As expected from  
242 the different types of SNVs leveraged for subclonal reconstruction, algorithms were highly  
243 discordant in the numbers of SNVs identified as clonal or subclonal. In samples where the  
244 subclonal reconstruction algorithm was successfully executed across all four mutation detection

245 tool combinations, DPCLust used and timed the most SNVs on average ( $2,941 \pm 3,929$ , mean  $\pm$   
246 SD; **Figure 5A**), followed by PhyloWGS ( $2,473 \pm 1,662$ , **Figure 5B**), PyClone ( $1,738 \pm 1,580$ ,  
247 **Figure 5C**) and SciClone ( $178 \pm 480$ , **Figure 5D**). As expected from the influence of MuTect on  
248 the prediction of subclonal clusters, its use was associated with the identification of an order of  
249 magnitude more subclonal SNVs, but similar numbers of clonal SNVs as with use of  
250 SomaticSniper.

251 To further evaluate how mutation detection tools affect the timing of SNVs, we calculated the  
252 Jaccard index of clonal SNVs identified between all pipeline pairs using the same subclonal  
253 reconstruction algorithm, and the same for subclonal SNVs (**Figure 5E**). In PhyloWGS-  
254 comprising pipelines, clonal SNV identifications were in high agreement (mean Jaccard index  $\pm$   
255 SD:  $44.6 \pm 30.2\%$ ) but subclonal SNV identifications were significantly less so ( $10.0 \pm 22.4\%$ ;  $p$   
256  $< 2.2 \times 10^{-16}$ , Wilcoxon signed-rank test), particularly between pipelines using different SNV  
257 detection tools. The results were similar for other algorithms: DPCLust (clonal Jaccard index:  
258  $46.3 \pm 33.2\%$ , mean  $\pm$  SD; subclonal:  $15.4 \pm 27.5\%$ ), PyClone (clonal:  $38.0 \pm 32.2\%$ ; subclonal:  
259  $9.6 \pm 21.6\%$ ) and SciClone (clonal:  $33.3 \pm 31.5\%$ ; subclonal:  $14.8 \pm 29.3\%$ ). Overall, we observe  
260 diversity in SNV profiles and clonality predictions across pipelines, with extensive diversity in  
261 subclonal SNV profiles associated with mutation detection tools.

262 To better understand how subclonal reconstruction algorithms differ in their prediction of SNV  
263 clonality, we next focused on SNVs identified as clonal across all pipelines using the same  
264 mutation detection tool combination. For each sample, we assessed the overlap in clonal SNVs  
265 identified by each pipeline and found only a small percentage of SNVs per sample that were  
266 unanimously identified as clonal: SomaticSniper-TITAN:  $2.0 \pm 5.8\%$ , SomaticSniper-  
267 Battenberg:  $3.8 \pm 8.0\%$ , MuTect-TITAN:  $0.5 \pm 2.0\%$ , MuTect-Battenberg:  $1.0 \pm 3.1\%$  (mean  $\pm$   
268 SD; **Supplementary Figure 6A-D**). Nevertheless, most SNVs were identified as clonal by more  
269 than one algorithm (SomaticSniper-TITAN:  $77.4 \pm 25.2\%$ , SomaticSniper-Battenberg:  $91.9 \pm$   
270  $17.8\%$ , MuTect-TITAN:  $48.3 \pm 30.9\%$ , MuTect-Battenberg:  $71.9 \pm 28.5\%$ ). Pipelines using  
271 Battenberg were characterized by large overlaps in clonal SNV identifications between  
272 PhyloWGS, DPCLust and PyClone (SomaticSniper-Battenberg:  $63.2 \pm 34.3\%$ , MuTect-  
273 Battenberg:  $46.2 \pm 33.5\%$ ). Pipelines using TITAN were characterized by modest overlaps  
274 between these three, but stronger overlap between PhyloWGS and DPCLust (SomaticSniper-  
275 TITAN:  $42.9 \pm 35.4\%$ , MuTect-TITAN:  $27.1 \pm 26.1\%$ ). Given the lack of correlation between

276 subclonal reconstruction algorithms in estimating the number of subclones present in a sample,  
277 this could suggest that disagreements between subclonal reconstruction algorithms mostly fall in  
278 defining the subclonal populations.

### 279 **Consistency of CNA Clonality**

280 We also evaluated the influence of mutation detection tools on clonal and subclonal CNA  
281 identification. We focused on PhyloWGS, as it was the only algorithm considered here that co-  
282 clusters SNVs and CNAs. Previous work on this cohort using the SomaticSniper-TITAN-  
283 PhyloWGS pipeline identified four clonal CNA subtypes and three subclonal CNA subtypes<sup>13</sup>,  
284 so we first evaluated their robustness across pipelines. In general, clonal subtypes were more  
285 robust to pipeline changes, while subclonal subtypes were less so (**Supplementary Figure 7A-**  
286 **B, Supplementary Data 21-32**). Pipelines employing the same CNA detection tool also had  
287 more similar profiles than those using different ones.

288 We next assessed the agreement of these pipelines in their identification of clonal and subclonal  
289 CNAs. We calculated the Jaccard index of the identification of 1.0 Mbp genomic bins with  
290 CNAs between pipeline pairs, where the direction of aberration (*i.e.*, gain *vs.* loss) must match to  
291 be considered as an agreement. We found significantly greater agreement for clonal CNAs  
292 compared to subclonal CNAs across all pipeline pairs (mean clonal Jaccard index  $\pm$  SD: 50.5  $\pm$   
293 21.1%, subclonal Jaccard: 15.6  $\pm$  21.8%; all  $p < 2.2 \times 10^{-16}$ , Wilcoxon signed-rank test;  
294 **Supplementary Figure 7C**). Pipelines using the same CNA detection tool tended to agree,  
295 although divergence was expected because the reconstructed clonality of CNA segments can be  
296 influenced by the VAFs of SNVs in the segment. By contrast, pipelines with different CNA  
297 detection tools had less clonal and little subclonal agreement. Thus, for both SNVs and CNAs,  
298 clonal mutational landscapes were relatively invariant to pipeline but subclonal ones were not.

### 299 **Impact of Reconstruction Variability on Downstream Analyses**

300 Given these differences in SNV and CNA clonality prediction across pipelines, we sought to  
301 understand how they might influence the timing of mutations in cancer driver genes. These genes  
302 are of particular relevance as they can be actionable as predictive or prognostic biomarkers. We  
303 examined the clonality of mutations in five genes driven by recurrent somatic SNVs (*ATM*,  
304 *FOXA1*, *MED12*, *SPOP* and *TP53*) and eight driven by recurrent somatic CNAs (*CDH1*,  
305 *CDKN1B*, *CHD1*, *MYC*, *NKX3-1*, *PTEN*, *RBI* and *TP53*) in localized prostate cancer<sup>13,23</sup>.

306 Focusing on PhyloWGS-comprising pipelines, these driver events were overwhelmingly  
307 predicted to occur early (*i.e.* clonally) during tumour evolution, with  $87.2 \pm 16.8\%$  (mean  $\pm$  SD)  
308 of SNV and  $91.5 \pm 6.4\%$  of CNA driver mutations identified as clonal across pipelines  
309 (**Supplementary Figure 8A-B**). There was also broad consensus in these predictions: when a  
310 clonal SNV was identified in a specific driver gene and sample by any single pipeline, all four  
311 pipelines identified a clonal SNV in that driver gene in the same sample in  $39.5 \pm 22.5\%$  of cases  
312 (mean  $\pm$  SD). CNAs showed even higher consensus ( $50.4 \pm 14.8\%$ ; **Supplementary Figure 8C**).  
313 One outlier was *MED12*, where there was disagreement across pipelines with the same SNV  
314 detection tools: since *MED12* is located on the X chromosome and Battenberg does not generate  
315 copy number status for regions of uncertainty and the sex chromosomes, its mutations were  
316 disregarded during subclonal reconstruction because PhyloWGS only considers SNVs with  
317 overlapping copy number status.

318 We then evaluated how CNA clonality predictions would affect the identification of genes as  
319 significantly differentially mutated clonally *vs.* subclonally. Within each pipeline we determined  
320 whether each 1.0 Mbp genomic bin had different proportions of gains and losses clonally and  
321 subclonally (FDR  $< 0.05$ , Pearson's  $\chi^2$  Test, clonal: loss, neutral, gain *vs.* subclonal: loss, neutral,  
322 gain; **Methods**). The number of genes in regions with CNAs occurring statistically more  
323 frequently early or late differed dramatically across PhyloWGS-comprising pipelines (MuTect-  
324 TITAN: 5,344; SomaticSniper-TITAN: 5,198; MuTect-Battenberg: 1,498; SomaticSniper-  
325 Battenberg: 339). A consensus set of 339 genes showed a bias in timing in all pipelines as  
326 preferentially mutated clonally (**Supplementary Figure 9A**, **Supplementary Data 33-36**).  
327 These genes were enriched for *TP53*-based regulation of death receptors, *TRAIL* signaling and  
328 natural killer cell mediated cytotoxicity (FDR  $< 0.05$ ; **Supplementary Figure 9B**).

329 To evaluate whether pipeline differences could influence the accuracy of biomarkers, we focused  
330 on biochemical relapse after definitive local therapy. Previous work has identified clonality to be  
331 prognostic in this setting, both independently and when combined with an established multi-  
332 modal (CNA, SNV, SV and methylation) gene-specific biomarker<sup>13,23</sup>. Discretization by  
333 clonality (monoclonal *vs.* polyclonal) only stratified patients by outcome in the SomaticSniper-  
334 TITAN-PhyloWGS pipeline ( $p = 0.004$ , log-rank test; **Supplementary Figure 10A**), but not any  
335 other (all  $p > 0.05$ , log-rank test; **Supplementary Figure 10B-P**). The unified biomarker  
336 integrating clonality and a multi-modal biomarker achieved prognostic value in more pipelines ( $p$

337 < 0.05 in 14/16 models, log-rank test; **Supplementary Figure 11A-P**), with concordant trends  
338 across all pipelines. Thus, the prognostic effect size of clonality in prostate cancer is smaller than  
339 the technological effect size in this cohort, with a clinical signal smaller than technical variance.  
340 As a result, the translational potential of clonality in localized prostate cancer is improved when  
341 it is integrated with complementary gene-specific biomarker information.

## 342 **Comparing Reconstructions using Single and Multiple Regions**

343 Our analyses of a large cohort of single-sample reconstructions highlight large inter-pipeline  
344 differences in the determination of subclonal architecture and prediction of mutation clonality.  
345 To better relate these results to the ground-truth, we focused on a set of ten localized prostate  
346 cancers where samples from multiple regions of the tumour were available (30 genomes in total,  
347 ranging from 2-4 per patient). These data allowed us to directly compare single-region to multi-  
348 region reconstructions using PhyloWGS and PyClone, providing an estimate of the extent to  
349 which the former underestimates true clonal complexity.

350 We first quantified the differences in the number of subclones predicted from single-region and  
351 multi-region reconstructions of the ten tumours (**Supplementary Data 37-48**). Multi-region  
352 reconstructions predicted more subclones than single-region reconstructions in pipelines using  
353 PhyloWGS:  $4.6 \pm 2.4$  (mean  $\pm$  SD) subclones were predicted with multi-region reconstructions  
354 while  $2.0 \pm 0.9$  subclones were predicted with single-region reconstructions (**Figure 6A**). This  
355 difference was not seen in pipelines using PyClone (multi-region reconstructions:  $2.2 \pm 1.7$ ,  
356 single-region reconstructions:  $2.3 \pm 2.0$ ), likely due to the constraint that only mutations present  
357 in all samples are used for multi-region reconstruction (**Figure 6B**). These data suggest that the  
358 typical single-sample reconstruction identifies fewer than half of the subclones present in the  
359 tumour, and this could very well be a lower-bound estimate because of the limited sequencing  
360 depth and spatial sampling of this cohort. On the other hand, multi-sample reconstructions also  
361 predicted significantly more subclones within the index lesion sample compared to single-sample  
362 reconstruction of the index lesion alone in pipelines using PhyloWGS (mean number of  
363 subclones in index lesion from multi-region reconstruction  $\pm$  SD:  $2.6 \pm 1.5$ , from single-region  
364 reconstruction:  $1.9 \pm 0.9$ ;  $p = 2.4 \times 10^{-4}$ , Wilcoxon signed-rank test; **Supplementary Figure**  
365 **12A**), but not those using PyClone (multi-region reconstruction mean  $\pm$  SD:  $2.2 \pm 1.7$ , single-  
366 region reconstruction:  $2.5 \pm 2.5$ ;  $p \approx 1$ , Wilcoxon signed-rank test; **Supplementary Figure 12B**).

367 Together this suggests that single-region reconstructions are limited by spatial sampling from  
368 fully resolving the intra-tumoural heterogeneity of both the overall tumour and the sampled  
369 region, for example due to cases where subclones appear with the same CCF and are thus  
370 indistinguishable from single-region reconstructions alone<sup>32</sup>.

371 We next sought to determine the extent of variability in SNV clonality predictions between  
372 single-region and multi-region reconstructions. We identified SNVs that were predicted be the  
373 same clonality (clonal or subclonal) in both single- and multi-region reconstructions ('Match in  
374 Multi and Single'). For SNVs with mismatched clonality, we further categorized them as clonal  
375 in multi-region reconstruction and subclonal in single-region reconstruction ('Clonal in Multi-  
376 region') or *vice versa* ('Subclonal in Multi-Region'), or SNVs that were uniquely considered in  
377 single-region reconstructions ('Unique in Single-region') or multi-region reconstructions  
378 ('Unique in Multi-region'). The last category of SNVs is unique to PhyloWGS as it is able to  
379 consider SNVs unique to individual samples for multi-region analysis. SNV clonality predictions  
380 matched less than half the time for pipelines using PhyloWGS ( $32.2 \pm 24.5\%$ , mean  $\pm$  SD;  
381 **Figure 7A**). Pipelines using PyClone achieved modestly higher clonality agreement, perhaps due  
382 to the smaller number of subclones predicted in multi-region reconstructions and the lack of  
383 multi-region unique SNVs ( $38.6 \pm 25.4\%$ ; **Figure 7B**). Mismatched SNVs tended to be clonal in  
384 single-region reconstructions and subclonal in multi-region reconstructions, as expected.  
385 Consistent with simulations<sup>33</sup> and previous observations, multi-region reconstructions are able to  
386 better define subclonal populations of cells by identifying and disambiguating those missed or  
387 merged by single-region sampling.

388 We also examined the agreement between single-region and multi-region reconstruction CNA  
389 clonality predictions in pipelines using PhyloWGS (**Supplementary Figure 13**). Agreements  
390 were similarly variable, with less than half of CNAs matching in clonality between the single-  
391 and multi-region reconstructions and extensive variance across samples and pipelines ( $35.2 \pm$   
392  $31.5\%$ , mean  $\pm$  SD). As with SNVs, mismatches mostly involved clonal CNAs in single-region  
393 reconstructions that were identified as subclonal in multi-region reconstructions.

394 To better understand this sampling bias, we analyzed how well the clonal population of the index  
395 lesion from single-region reconstruction represents the clonal population of the entire tumour. In  
396 PhyloWGS-comprising pipelines, multi-region reconstruction often showed that SNVs identified

397 as clonal in the index lesion were actually subclonal (**Supplementary Figure 14A**).  
398 Nevertheless, the majority of single-region clonal SNVs were truly clonal in multi-region  
399 reconstruction ( $66.6 \pm 29.8\%$ , mean  $\pm$  SD). As before, pipelines using PyClone showed much  
400 higher agreement ( $91.4 \pm 23.3\%$ ), likely because of the large number of excluded SNVs  
401 (**Supplementary Figure 14B**). A similar analysis of subclonal SNVs showed that, as expected,  
402 only a small proportion of subclonal SNVs defined by single-region reconstructions of the index  
403 lesion was clonal in multi-region reconstructions in pipelines using PhyloWGS and MuTect  
404 ( $12.2 \pm 17.5\%$ , mean  $\pm$  SD). In contrast, multi-region reconstruction pipelines using PhyloWGS  
405 and SomaticSniper predicted many subclonal SNVs from single-region reconstructions as clonal  
406 ( $55.2 \pm 40.3\%$ ). This highlights a potential limitation of multi-region subclonal reconstruction  
407 algorithms with a need for shared SNVs or CNAs.

## 408 Discussion

409 It is difficult to benchmark the accuracy of subclonal reconstruction methodologies since a  
410 robust gold-standard experimental dataset does not yet exist. Simulation frameworks are of great  
411 value, but might not fully recapitulate the error-profiles and signal-biases of real data<sup>34</sup>. To  
412 evaluate the technological variability in estimating aspects of subclonal architecture, we  
413 evaluated 293 tumours using sixteen pipelines. These data provide an experimental lower-bound  
414 on the algorithmic variability of tumour subclonal reconstruction in a large high-depth whole-  
415 genome sequencing cohort, at least for a single cancer type and stage. We complement these data  
416 by assessing eighteen subclonal reconstruction pipelines across a set of 10 multi-region tumours  
417 to estimate the degree to which single-sample reconstructions underestimate clonal complexity  
418 the full tumour.

419 Subclonal reconstruction algorithms differ substantially in their prediction of subclonal  
420 architecture across all mutation detection tool combinations, with no pair of algorithms  
421 consistently achieving similar results in cellularity estimates, prediction of subclone number and  
422 assignment of mutation clonality. While the subclonal CNA detection tool used mostly  
423 influenced cellularity estimates but no other aspects of subclonal architecture, large differences  
424 were driven by changing the SNV detection approach. Differences between SNV detection tools  
425 led to major divergences in subclonal reconstruction: pipelines using MuTect found extensive  
426 subclonal diversity, at least partly due to the greater number of low VAF mutations detected.

427 SNV detection benchmarking efforts<sup>31</sup> could aid in the further characterization of the error  
428 profiles of SNV detection tools and optimize parameter tuning to improve subclonal  
429 reconstruction. Future studies might benefit from merging multiple subclonal reconstruction  
430 pipelines, for example to provide a potential envelope of upper and lower bounds on different  
431 features of the reconstruction.

432 The potential translational and clinical impact of these technical variabilities is considerable. For  
433 example, technological differences between analysis pipelines were larger than the effect size of  
434 the association between evolutionary complexity and patient survival. This suggests that  
435 estimates of technical variability should be provided for analyses dependent on subclonal  
436 architecture, such as in studies mapping evolutionary and migration trajectories between primary  
437 and metastatic tumours. Studies identifying clonal and especially subclonal driver mutations  
438 should be interpreted with such variability estimates as reference since subclonal mutational  
439 landscapes were found to be especially vulnerable to pipelines changes when clonal ones were  
440 less so. Articulating how these algorithmic differences relate to the clinical effect-size will  
441 greatly improve interpretability of these types of data.

442 Future studies also need to carefully consider the failure-rates of different reconstruction  
443 algorithms, as algorithms leveraging clonal or neutral copy number regions might not be suitable  
444 for tumour types characterized by large numbers of CNAs and might call for specific CNA  
445 detection strategies. Computational failures are problematic for clinical applications and, in  
446 combination with the substantive computational requirements that scale with the number of  
447 mutations, could be problematic for cancer types characterized by a high mutational burden.

448 Our evaluation of subclonal reconstruction using data from spatially distinct regions of tumours  
449 found that reconstructions relying on a single sample systematically underestimated the number  
450 of subclones in a tumour. Input constraints and non-exhaustive sequencing depth and spatial  
451 sampling in multi-region reconstructions also suggest that the current level of underestimation is  
452 only the lower-bound. This is in line with previous work in kidney cancer<sup>6,11</sup>. These data also  
453 agree with previous work showing the distinct mutational profiles of prostate cancer samples  
454 from spatially distinct regions of the same tumour<sup>8</sup> and reinforces the hypothesis that sufficient  
455 sampling will uncover multiple subclones in nearly all cancers. It also suggests that strategies for



456 robust multi-region-aware subclonal mutation detection would be a significant benefit to  
457 subclonal reconstruction analyses.

458 Larger datasets are necessary to better evaluate the performance of subclonal reconstruction  
459 methodologies. While simulated data is valuable<sup>34</sup>, single-cell sequencing datasets will likely  
460 significantly improve the evaluation of ground truth for subclonal reconstruction algorithms in  
461 patient samples. In the meantime, this work involving a large clinical cohort will aid in refining  
462 subclonal reconstruction methods and provide guidance for evaluating the subclonal architecture  
463 of cancer samples.

464

## 465 **Methods**

### 466 **Patient Cohort**

467 We aggregated a retrospective cohort of localized prostate tumours with patient consent and  
468 Research Ethics Board approval from published datasets, with whole-genome sequencing of  
469 tumour samples and matched blood-based normal samples<sup>13,23,24,35–38</sup>. The cohort includes 293  
470 patients with tumour samples from the index lesion and 10 patients with multiple samples from  
471 intraductal carcinoma and juxtaposed adjacent invasive carcinoma. For patients receiving  
472 radiotherapy, the index tumour was identified on transrectal ultrasound and sampled by needle  
473 biopsies (TRUS-Bx) and was deemed the largest focus of disease that was confirmed  
474 pathologically. A fresh-frozen needle core ultrasound-guided biopsy to this index lesion was  
475 obtained for macro-dissection. For patients receiving surgery, the index tumour was identified  
476 macroscopically by a GU expert pathologist at the point of surgery and later sampled and  
477 biobanked. A fresh-frozen tissue specimen from the index lesion was then obtained from macro-  
478 dissection. Details of the patient cohort have been described previously<sup>13,24</sup>.

479 We focused on patients with clinical intermediate-risk disease as defined by NCCN, with  
480 intermediate-risk factors (T2b or T2c disease, ISUP Grade Group 2 or 3 or pre-treatment prostate  
481 specific antigen (PSA) serum levels between 10-20 ng/mL). All patients received either precision  
482 image-guided radiotherapy or radical prostatectomy with no randomization or classification and  
483 were hormone-naive at time of therapy. Four patients in the multi-region sequencing cohort  
484 carried germline BRCA2 mutations and had formalin-fixed paraffin-embedded tissues instead of  
485 fresh-frozen (CPCG9001, CPCG9002, CPCG9003, CPCG9005). Sample regions suitable for  
486 macro-dissection (tumour cellularity > 70%) were marked by genitourinary pathologists and  
487 manually macro-dissected, followed by DNA extraction and sequencing.

### 488 **Whole genome sequencing data analysis**

489 Protocols for whole-genome sequencing data generation and processing have been previously  
490 described<sup>13,23,24</sup>. Briefly, raw sequencing reads from the tumour and normal samples were  
491 aligned against human reference genome build hg19 using bwa-aln (v0.5.7)<sup>39</sup>. Lane-level BAMs  
492 from the same library were merged and duplicates were marked using picard (v1.92). Local  
493 realignment and base quality recalibration were performed together for tumour/normal pairs  
494 using GATK (v.2.4.9)<sup>40</sup>. Tumour and normal sample-level BAMs were extracted separately, had

495 headers corrected with SAMtools (v0.1.9)<sup>41</sup> and were indexed with picard (v1.107). ContEst  
496 (v1.0.24530)<sup>42</sup> was used to estimate lane-level and sample-level sample mix-up and lane-level  
497 cross-individual contamination on all sequences, with no significant contaminated detected.

## 498 **Tumour Somatic Mutation Assessment**

499 We detected subclonal copy number aberrations from whole-genome sequencing data using  
500 Battenberg (v2.2.6)<sup>7</sup>, TITAN (v1.11.0)<sup>25</sup> and FACETS (v0.5.14)<sup>28</sup>. First, Battenberg (v2.2.6) was  
501 installed with underlying ASCAT (v2.5)<sup>43</sup> using the installation and running wrapper  
502 cgpBattenberg (v3.1.0). Required reference files were downloaded as instructed in  
503 <https://github.com/Wedge-Oxford/battenberg> and further required data files were generated as  
504 instructed in <https://github.com/cancerit/cgpBattenberg>. An ignore file was created for the  
505 genome assembly hg19 to exclude all chromosomes not in 1-22. Battenberg (v2.2.6) was run  
506 with -gender of XY for male patients and -t of 14 to run using 14 threads, and otherwise default  
507 parameters. The resulting primary solution was subjected to manual refitting in situations  
508 meeting the following criteria: 1) the solution involved a high copy number segment with high  
509 BAF and low logR, indicating an unrecognized homozygous loss event, 2) nearly all copy  
510 number aberrations were subclonal, 3) there were unreasonably high copy numbers up to  
511 infinity. Refitting was performed until the concerns for refitting were resolved or for three  
512 attempts after which the original solution was accepted. The CNAs obtained from the primary  
513 solution, along with tumour cellularity and ploidy were used for further analysis. We have  
514 described subclonal copy number analysis using TITAN (v1.11.0) previously in detail<sup>13</sup>. Briefly,  
515 TITAN (v1.11.0) was run through the Kronos (v1.12.0)<sup>44</sup> pipeline for whole-genome sequence  
516 preprocessing and subclonal copy number assessment. GC and mappability files for bias  
517 correction were prepared using HMMcopy (v0.1.1) and bowtie (v2.2.6)<sup>45</sup> on the hg19 reference  
518 genome. Heterogeneous positions in the sequence data were identified by MutationSeq (v4.3.7)<sup>46</sup>  
519 using known dbSNP sites from GATK (v2.4.9). For each whole-genome sequence, TITAN  
520 (v1.11.0) made predictions of the existence of one to five subclones based on the given input  
521 numClusters and the solution with the lowest S\_Dbw validity index<sup>25</sup> was used to obtain the  
522 cellularity, ploidy and subclonal CNAs for downstream analysis. Finally, to prepare inputs for  
523 subclonal copy number assessment by FACETS (v0.5.14), the accompanying snp-pileup  
524 (v434b5ce) algorithm was installed with underlying htlib (v1.9)<sup>41</sup>. A SNP location VCF file was  
525 downloaded as instructed for hg19 with SNP version b151 and human genome build version

526 GrCh37p13 from  
527 [ftp://ftp.ncbi.nlm.nih.gov/snp/organisms/human\\_9606\\_b151\\_GRCh37p13/VCF/00-](ftp://ftp.ncbi.nlm.nih.gov/snp/organisms/human_9606_b151_GRCh37p13/VCF/00-common_all.vcf.gz)  
528 [common\\_all.vcf.gz](ftp://ftp.ncbi.nlm.nih.gov/snp/organisms/human_9606_b151_GRCh37p13/VCF/00-common_all.vcf.gz), and `snp-pileup` (v434b5ce) was run using developer recommended  
529 parameters (`-g -q15 -Q20 -P100 -r25,0`). All FACETS (v0.5.14) runs used the seed 1234 and  
530 default parameters for all steps, except for `procSample` where the developer recommended  
531 parameter `cval = 150` was used.

532 We used MuTect (v1.1.4)<sup>27</sup> and SomaticSniper (v1.0.2)<sup>26</sup> for the detection of somatic single  
533 nucleotide variants from whole-genome sequencing data. MuTect was run to obtain candidate  
534 SNVs with dbSNP138<sup>47</sup>, COSMIC (v66)<sup>48</sup> and default parameters except the `-tumor_lod` option  
535 (tumor limit of detection). The `-tumor_lod` option was set to 10 to increase the stringency of  
536 detection. Outputs that contained REJECT were filtered out and the remaining SNVs were used  
537 for downstream analysis. Details for SomaticSniper (v1.0.2) variant detection have been  
538 described previously<sup>23</sup>. In short, SomaticSniper (v1.0.2) was used to identify candidate SNVs  
539 with default parameters except the `-q` option (mapping quality threshold), which was set to 1 as  
540 per developer recommendation. Candidate SNVs were filtered through standard and LOH  
541 filtering using a pileup indel file generated on the sequence data using SAMtools (v0.1.9)<sup>41</sup>,  
542 bam-readcount filtering and false positive filtering. Only high confidence somatic SNVs  
543 obtained from the high confidence filter using default parameters were used for further analysis,  
544 as per developer recommendations. We further performed annotation and filtering on all SNVs,  
545 with full details given previously<sup>13</sup>. In brief, SNVs obtained by MuTect (v1.1.4) and  
546 SomaticSniper (v1.0.2) were annotated with associated genes and functions by ANNOVAR  
547 (v2015-06-17)<sup>49</sup> using RefGene, subjected to deny-list filtering to remove known germline  
548 contaminants and sequencing artifacts and allow-list filtering through COSMIC (v70)<sup>48</sup>. This  
549 was done before downstream subclonal reconstruction. SNVs were further subjected to filtering  
550 to remove SNVs not at callable bases (where callable bases are those with  $\geq 17x$  coverage for the  
551 tumour and  $\geq 10x$  coverage for the normal).

## 552 **Subclonal Reconstruction Pipeline Construction**

553 We define a subclonal reconstruction pipeline as comprised of a SNV detection tool, a CNA  
554 detection tool and a subclonal reconstruction algorithm. A pipeline is said to be using or

555 comprising of a tool and/or an algorithm when the tool/algorithm is incorporated as one step of  
556 the pipeline.

557 For single-region reconstruction, the SNV detection tools SomaticSniper (v1.0.2) and MuTect  
558 (v1.1.4), the CNA detection tools Battenberg (v2.2.6) and TITAN (v1.11.0), and the subclonal  
559 reconstruction algorithms PhyloWGS (v3b75ba9), PyClone (v0.13.0), DPCLust (v2.2.5) and  
560 SciClone (v1.0.7) were combined in factorial combinations to construct 16 pipelines. Subclonal  
561 reconstruction was run on the cohort of 293 tumours with index lesion sequencing for single-  
562 region subclonal reconstruction.

563 For multi-region reconstruction, the SNV detection tools SomaticSniper (v1.0.2) and MuTect  
564 (v1.1.4), the CNA detection tools Battenberg (v2.2.6), TITAN (v1.11.0) and FACETS (v0.5.14),  
565 and the subclonal reconstruction algorithms PhyloWGS (v3b75ba9), PyClone (v0.13.0) and  
566 SciClone (v1.0.7) were combined in factorial combinations to construct 18 pipelines. For the 10  
567 tumours with multi-region sequencing, each individual sequencing sample (total 30, 2-4 samples  
568 per tumour) was first subjected to single-region subclonal reconstruction using the 18 pipelines,  
569 followed by multi-region subclonal reconstruction using the 18 pipelines where all regions of a  
570 tumour were provided as input.

### 571 **Subclonal Reconstruction of Tumours using PhyloWGS**

572 We used the `cnv-int` branch of PhyloWGS (<https://github.com/morrislab/phylowgs/tree/cnvint>,  
573 commit: 3b75ba9c40cfb27ef38013b08f9e089fa4efa0c0)<sup>15</sup> for the reconstruction of tumour  
574 phylogenies, as described previously<sup>13</sup>. Briefly, subclonal CNA segments and cellularity inputs  
575 were parsed using the provided `parse_cnvs.py` script (the `parse_cnvs.py` was custom augmented  
576 to process inputs from FACETS [v0.5.14]) and filtered to remove any segments shorter than 10  
577 kbp. The `create_phylowgs_inputs.py` script was used to generate PhyloWGS (v3b75ba9) inputs  
578 for each sample. All default parameters were used, including limiting the number of SNVs  
579 considered to 5,000 for the interest of runtime, to launch reconstructions using `evolve.py`. Multi-  
580 region subclonal reconstruction was performed by providing all regions belonging to the same  
581 tumour as input for the reconstruction and the procedure was otherwise identical to the single-  
582 region reconstructions.

583 The best phylogenetic clone tree for each run and the CNAs and SNVs associated with each  
584 subclone in that structure were determined by parsing the output JSON files for the tree with the

585 largest log likelihood value. In addition to the best tree structure, the output JSON file was also  
586 parsed for all predicted tree structures as ordered by log likelihood values to assess the change in  
587 predictions across the 2,500 Markov chain Monte Carlo iterations. Only samples with a total of  
588 2,500 complete MCMC iterations were considered, and samples with poly-tumour or overly  
589 complex intermediate clone tree structures that were never the final solution for any sample were  
590 excluded.

## 591 **Subclonal Reconstruction of Tumours using PyClone**

592 We used PyClone (v0.13.0)<sup>17</sup> for single- and multi-region mutation clustering. A mutation input  
593 file was created for each sample by obtaining the tumour reference and variant read counts for  
594 each SNV from input VCFs and annotating them with the clonal major and minor copy numbers  
595 for the position from CNA inputs. Since PyClone (v0.13.0) leverages SNVs in clonal CNA  
596 regions, all SNVs in subclonal CNA regions were not considered. SNVs in regions without copy  
597 number information were also discarded, and the normal copy number was set to 2 for autosomes  
598 and 1 for chromosomes X and Y. The mutation input file, along with tumour cellularity as  
599 predicted by the subclonal CNA detection tool were used as inputs for the `run_analysis_pipeline`  
600 to launch PyClone (v0.13.0)<sup>17</sup>, using 12345 as the seed for all runs. Notably, since PyClone  
601 (v0.13.0) was originally developed for deep sequencing (>100x) data, the developer  
602 recommended setting the “density” parameter to “pyclone\_binomial” to account for  
603 characteristics whole-genome sequencing data. The number of Markov chain Monte Carlo  
604 iterations were also set to 100,000, with 1,000 burn-ins. Otherwise default parameters were used.  
605 PyClone (v0.13.0) outputted ‘cellular prevalence’ as defined by the authors as ‘the proportion of  
606 tumor cells harboring a mutation’ fits the definition of cancer cell fraction for this study, and  
607 cellular prevalence as defined in this study was calculated by multiplying the outputted ‘cellular  
608 prevalence’ with purity estimates from the respective CNA detection tool. Multi-region  
609 reconstructions using PyClone (v0.13.0) were launched by including all mutation input files and  
610 tumour cellularities prepared for single-region reconstructions as outlined above for all samples  
611 of a tumour as input to `run_analysis_pipeline`. Cellular prevalence as defined in this study was  
612 similarly obtained from ‘cellular prevalence’ as outputted by PyClone (v0.13.0) by individually  
613 adjusting for the tumour contents for each sample of the tumour.

## 614 **Subclonal Reconstruction of Tumours using DPCLust**

615 We used DPCLust (v2.2.5)<sup>16</sup> for single-region subclonal reconstruction. DPCLust (v2.2.5) was run  
616 using the dpc.R pipeline available *via* the DPCLust SMC-HET Docker  
617 ([https://github.com/Wedge-Oxford/dpclust\\_smchet\\_docker](https://github.com/Wedge-Oxford/dpclust_smchet_docker), commit a1ef254), using also  
618 dpclust3p (v1.0.6). The pipeline was customized to process inputs from SomaticSniper (v.1.0.2)  
619 and TITAN (v1.11.0). The inputs for each tumour sample were the VCF file provided by the  
620 SNV detection tool, and subclonal copy number, cellularity, ploidy, and purity as predicted by  
621 the subclonal CNA detection tool, using 12345 as the seed and otherwise default parameters. The  
622 results in the subchallenge1C.txt output file were taken as the mutation clustering solution to  
623 obtain the number of subclones predicted by DPCLust and their cellular prevalences (v2.2.5)<sup>16</sup>.  
624 Results in the subchallenge2A.txt output file were taken to define the mutation composition of  
625 each cluster.

## 626 **Subclonal Reconstruction of Tumours using SciClone**

627 We used SciClone (v1.0.7)<sup>20</sup> for single- and multi-region subclonal reconstruction. Input VCFs  
628 were used to calculate variant allele frequencies (in percentage) and CNA inputs were used to  
629 determine regions with loss of heterozygosity. Only SNVs in clonally copy number neutral  
630 (major = 1, minor = 1) regions with no subclonal CNAs were considered by SciClone (v1.0.7)  
631 and all samples were run using default parameters. Multi-region reconstructions using SciClone  
632 (v1.0.7) were run by including inputs for all samples of a tumour. Mutation clusters defined by  
633 SciClone (v1.0.7) were characterized using variant allele frequencies, and their VAFs were  
634 multiplied by a factor of 2 to convert to cellular prevalence as defined in this study.

## 635 **Post Processing of Subclonal Reconstruction Solutions**

636 Since subclones in PhyloWGS (v3b75ba9) trees are numbered based on cellular prevalence  
637 instead of evolutionary relationship, trees were transformed to consistent representations to allow  
638 comparison across cohorts following two rules: 1) trees are left-heavy, 2) all nodes at a particular  
639 tree depth must have numbers greater than that of nodes at lower tree depths, with the root node  
640 (normal cell population) starting at 0. Further, pruning of nodes was performed following the  
641 heuristic that each node must have at least 5 SNVs or 5 CNAs and a minimum cellular  
642 prevalence of 10%, creating a subclonal diversity lower bound for each tumour<sup>13</sup>. A node was  
643 pruned and merged with its sibling if their cellular prevalence difference was  $\leq 2\%$  and if both

644 were driven purely by SNVs (had  $\leq 5$  CNAs). A node was merged with its parent node if their  
645 cellular prevalence difference was  $\leq 2\%$ . When PhyloWGS (v3b75ba9) produced a poly-tumour  
646 solution for the best consensus tree, the algorithm was re-run up to 12 times with different  
647 random number generator seeds after which the final poly-tumour solution was accepted and  
648 considered to be a reconstruction failure. The seeds were applied in the following order: 12345,  
649 123456, 1234567, 12345678, 123456789, 246810, 493620, 987240, 1974480, 3948960, 7897920  
650 and 15795840. In the event PhyloWGS (v3b75ba9) failed to produce a solution due to  
651 reconstruction failures or excessive runtime ( $> 3$  months), the sample was excluded from  
652 analysis for that pipeline.

653 PyClone (v0.13.0), DPCLust (v2.2.5) and SciClone (v1.0.7) identified subclonal populations were  
654 pruned using similar heuristic as that for PhyloWGS (v3b75ba9). Specifically, for each tumour  
655 sample, a mutation cluster was pruned if it had fewer than five supporting SNVs or a cellular  
656 prevalence below 10% if it is the clonal cluster or below 2% if it is a subclonal cluster. If there  
657 were less than 5 total mutations (SNVs) assigned to clusters in a sample, or if all clusters had  
658 cellular prevalence of below 10%, a failed reconstruction was designated to the sample.  
659 Otherwise pruned clusters were merged with their nearest neighbor in cellular prevalence, and  
660 the weighted mean of cellular prevalence was assigned to the merged node. Moreover, two  
661 clusters were merged if they differed in cellular prevalence by  $\leq 2\%$ . Finally, mutation clusters  
662 were ordered by decreasing cellular prevalence and renumbered accordingly, and the cluster with  
663 the highest cellular prevalence was treated as the clonal cluster and its cellular prevalence taken  
664 as the cellularity estimated by the pipeline. This was a conservative approach as the detection of  
665 multiple primary tumours is challenging from single-sample subclonal reconstruction<sup>13</sup>.

## 666 **Union and Intersection of Mutation Detection Tools**

667 We obtained the union and intersection of raw SNVs by SomaticSniper (v1.0.2) and MuTect  
668 (v1.1.4) for each tumour sample using vcf-isec of vcftools (v0.1.15). The union and intersection  
669 sets of SNVs were then annotated and filtered with the same method as described above before  
670 being used in subsequent analysis<sup>13</sup>. For the comparison of characteristics between SNVs  
671 detected by MuTect (v1.1.4) and SomaticSniper (v1.0.2), all SNVs detected by each tool across  
672 all 293 index lesion samples were pooled to assess their VAFs and trinucleotide contexts. SNVs  
673 were grouped as intersect if detected by both tools, or as MuTect-unique or SomaticSniper-



674 unique, both pre- and post-filtering. The effect of filtering was assessed by comparing SNVs  
675 retained after filtering ('SomaticSniper' and 'MuTect') with those removed by it ('Removed  
676 SomaticSniper' and 'Removed MuTect'). Trinucleotide context profiles for each group of SNVs  
677 were normalized by the expected number of each trinucleotide across the hg19 genome.

678 We determined the union and intersection of CNAs detected by TITAN (v1.11.0) and Battenberg  
679 (v2.2.6), first parsed using `parse_cnvs.py` script of PhyloWGS (v3b75ba9) for consistent  
680 formatting, on a per base-pair basis. The intersection of CNAs, based on genomic coordinates  
681 and major and minor copy number, was determined using the `GenomicRanges` (v1.28.6)<sup>50</sup>  
682 package in R (v3.2.5). Regions with disagreeing copy number were identified using `bedtools`  
683 (v2.27.1)<sup>51</sup> and `bedr` (v1.0.6)<sup>52</sup>. A region is defined to have a tool-unique CNA if one tool  
684 detected a copy number aberration for the region while the other identified it as copy number  
685 neutral (major and minor copy number of 1, both clonally and subclonally). Regions where  
686 both algorithms detected different copy number aberrations were classified as disagreements. The  
687 union set of CNAs thus contained the intersection of CNAs and CNAs unique to either tool, and  
688 regions of disagreement were excluded as there was no natural way to resolve discrepancies. In  
689 contrast to TITAN, when a region is determined to have a subclonal aberration, Battenberg  
690 (v2.2.6) produces two entries, a clonal and subclonal copy number for each genomic region.  
691 These regions were labelled Battenberg-unique for its clear delineation of subclonal CNAs.  
692 However, the TITAN (v1.11.0) copy number aberration result for the region (if any) is used in  
693 the union of CNAs to avoid conflicting CNAs in the same region, as one cannot combine clonal  
694 Battenberg (v2.2.6) results with TITAN (v1.11.0) aberrations. The union and intersection set of  
695 CNAs were further filtered to remove any segments under 10 Kbp.

696 Four pipeline combinations using PhyloWGS (v3b75ba9) and the intersection and union of  
697 SNVs and CNAs were executed on 293 single-region samples. The script  
698 `create_phylowgs_inputs.py` was used to combine intersect and union of SNVs and CNAs as  
699 inputs for PhyloWGS (v3b75ba9), where no cellularity estimate was provided as there was no  
700 obvious way to derive that for the intersect and union of CNAs. The pipelines were run with  
701 otherwise identical procedure as single-region reconstructions with PhyloWGS (v3b75ba9).

## 702 **Clonality Classification**

703 We classified the phylogenetic clone trees outputted by PhyloWGS (v3b75ba9) and mutation  
704 clustering results outputted by PyClone (v0.13.0), DPCLust (v2.2.5) and SciClone (v1.0.7) as  
705 monoclonal or polyclonal based on the number of subclones they predicted. Solutions where  
706 only one subclone was predicted were termed *monoclonal*. In monoclonal reconstructions, the  
707 only subclone detected is then termed the clonal node. Solutions where more than one subclone  
708 was predicted were termed *polyclonal*. In polyclonal reconstructions, the subclone with the  
709 highest cellular prevalence was deemed clonal, and the rest of the subclones were subclonal. In  
710 situations where PhyloWGS (v3b75ba9) outputted phylogenies showing a normal root node with  
711 more than one direct child, the clone tree was termed *poly-tumour*, suggestive of multiple  
712 independent primary tumours. These were excluded from downstream analysis because the  
713 reconstruction of these phylogenies, especially from single sequencing samples, is challenging<sup>13</sup>.

714 CNA and SNV mutations were classified as clonal or subclonal based on their node assignment  
715 in the best PhyloWGS (v3b75ba9) consensus clone tree and PyClone (v0.13.0), DPCLust (v2.2.5)  
716 and SciClone (v1.0.7) mutation clusters. The mutations that define the clonal node were  
717 classified as clonal mutations, while all others were classified as subclonal mutations. The cancer  
718 cell fraction (CCF) of mutations was calculated by dividing the cellular prevalence of the node  
719 that the mutation belonged to by the predicted cellularity of the tumour sample.

## 720 **Analysis of Single Nucleotide Variants**

721 We compared the four pipelines using each subclonal reconstruction algorithm for their inference  
722 of clonal and subclonal SNVs. In each pairwise comparison, for each sample we noted the clonal  
723 SNV set identified by each algorithm and calculated the Jaccard index between the two sets. The  
724 analysis was performed separately for clonal and subclonal SNVs.

## 725 **Analysis of Copy Number Aberrations**

726 We further filtered the CNAs identified by PhyloWGS using OncoScan data for samples with the  
727 data available, removing the identified CNAs that did not overlap any OncoScan CNAs<sup>13</sup>. For  
728 samples without OncoScan data, CNAs outputted by PhyloWGS (v3b75ba9) were filtered to  
729 retain only those across genomic locations with recurrence of CNAs in OncoScan-filtered  
730 samples, with 10 being the established empirical recurrence threshold<sup>13</sup>. Bins of 1.0 Mbp were  
731 created across the genome to characterize the copy number profiles for each sample and were

732 assigned the copy number of overlapping genomic segments, either neutral or mutated. Regions  
733 not considered by PhyloWGS (v3b75ba9) due to lack of information were assumed to have the  
734 normal copy number of two. Profiles were created separately for clonal and subclonal CNAs. We  
735 further used previously identified clonal and subclonal subtypes to cluster samples<sup>13</sup>. Samples  
736 that were assigned a subclonal subtype in the SomaticSniper-TITAN pipeline<sup>13</sup> but had no  
737 subclonal populations detected in another pipeline were excluded from subclonal subtype  
738 analysis for that pipeline. Samples that had no subclonal populations detected in the  
739 SomaticSniper-TITAN pipeline and were therefore never assigned to a subclonal subtype were  
740 not considered in any subclonal subtype analysis. For each pipeline, we used the copy number  
741 profiles of all samples with available data to generate average subtype-specific clonal and  
742 subclonal CNA profiles of localized prostate cancer, with standard deviation.

743 We compared the CNA profiles identified by the four PhyloWGS-comprising pipelines by  
744 assessing the difference in clonal and subclonal CNAs between pipeline pairs. For each sample, a  
745 clonal CNA set was generated from pipeline results, where the direction of the CNA is taken into  
746 account. For example, if a sample was identified with a clonal gain in genomic bin 1 and a clonal  
747 loss in genomic bin 2, it would have the clonal CNA set +1, -2. The Jaccard index of clonal and  
748 subclonal CNA sets for each sample were calculated between all pipeline pairs.

749 We identified CNAs that were differentially altered clonally and subclonally. Using 1.0 Mbp  
750 bins across the genome, we aggregated the number of samples with and without a CNA  
751 overlapping each 1.0 Mbp stretch, with gains and losses considered separately. Clonal and  
752 subclonal CNAs were annotated separately, and only samples with *polyclonal* phylogenies were  
753 considered, since they have both clonal and subclonal components. Pearson's  $\chi^2$  test was used  
754 with multiple testing correction ( $FDR \leq 0.05$ ) to define the bins that were significantly enriched  
755 for clonal or subclonal CNAs that were gain or loss. CNAs in these bins were thus considered  
756 significantly differentially altered, with a predisposition to occur clonally or subclonally as a gain  
757 or a loss. Genes affected by differentially altered CNAs were annotated using RefSeq, and the  
758 lists of genes considered to have CNA biases by the four pipelines were compared for overlap.

759 We performed pathway enrichment analysis on the genes that were identified by all four  
760 PhyloWGS-comprising pipelines as affected by CNAs biased clonally or subclonally. Using all  
761 default parameters of gprofiler2 (v0.1.9) in R (v3.5.3)<sup>53</sup>, statistically significant pathways from

762 Gene Ontology (Biological Process, Molecular Function and Cellular Component), KEGG and  
763 Reactome were computed, with no electronic GO annotations. We discarded pathways that  
764 involved > 350 or < 5 genes. Cytoscape (v3.4.0) was used to visualize significant pathways<sup>54</sup>.  
765 Since all genes identified as significantly differentially altered were biased to be altered clonally,  
766 we defined these pathways as differentially altered clonally.

### 767 **Driver Mutation Analysis**

768 We gathered a list of known prostate cancer driver genes based on previous large sequencing  
769 studies<sup>13,23</sup>. The known CNA-affected driver genes considered were *MYC*, *TP53*, *NKX3-1*, *RBI*,  
770 *CDKN1B*, *CHDI*, *PTEN* and *CDHI*. The known SNV-affected driver genes considered were  
771 *ATM*, *MED12*, *FOXA1*, *SPOP* and *TP53*. PhyloWGS-comprising pipelines identified CNAs  
772 overlapping CNA-affected driver genes and SNVs that occurred in SNV-affected driver genes.  
773 These were defined to be driver CNAs and driver SNVs, respectively. A sample was considered  
774 to have a consensus driver mutation, CNA or SNV, if the mutation was identified with the same  
775 clonality by all four PhyloWGS-comprising pipelines.

776 Driver SNVs and CNAs of each sample were categorized by the number of PhyloWGS-  
777 comprising pipelines they were identified in. Since four PhyloWGS-comprising pipelines were  
778 used, in each sample driver SNVs and CNAs could be identified in all four pipelines, three  
779 pipelines, two pipelines or one pipeline. Proportions of each category were calculated by  
780 dividing the number of samples in that category by the sum of samples assigned to all categories  
781 for the driver SNV or CNA. The analysis was done separately for clonal and subclonal  
782 mutations, such that the category of the driver SNVs or CNAs in a sample was defined by the  
783 most frequent identification of the clonality. For example, if a driver SNV in a sample was  
784 identified as clonal by two pipelines, subclonal by one pipeline and wildtype by the last pipeline,  
785 it would be counted in both category two for the clonal analysis and in category one for the  
786 subclonal analysis.

### 787 **Biomarker Survival Analysis**

788 We assessed the utility of clonality (monoclonal *vs.* polyclonal) as a biomarker in all sixteen  
789 pipelines used for single region subclonal reconstruction of 293 samples. Tumours were grouped  
790 by clonality and the two groups were compared using a log-rank test for differences in outcome.  
791 Tumours were also grouped by integrating the previously defined multi-modal biomarker<sup>23</sup>

792 (groups patients into low risk and high-risk) and clonality, creating unified groups (unified-low:  
793 monoclonal low-risk, unified-intermediate: monoclonal high-risk or polyclonal low-risk, unified-  
794 high: polyclonal high-risk)<sup>13</sup> that were compared using a log-rank test. Primary outcome as time  
795 to biochemical recurrence (BCR) was described in detail previously<sup>13</sup>. In brief, BCR was defined  
796 as PSA rise of  $\geq 2.0$  ng/mL above the nadir for radiotherapy patients and two-consecutive post-  
797 surgery PSA measurements  $> 0.2$  ng/mL (backdated to the date of first increase in PSA) for  
798 surgery patients. If a surgery patient had a post-operative PSA  $\geq 0.2$  ng/mL this was considered  
799 primary treatment failure. After salvage radiation therapy, if PSA continued to rise, BCR was  
800 backdated to the first PSA measurement  $> 0.2$  ng/mL, but if not then then this was not  
801 considered a BCR. Salvage therapy (hormone therapy or chemotherapy) was considered a BCR.

## 802 **Comparing Reconstruction using Single and Multiple Regions**

803 For each of the 10 tumours with multi-region sequencing, we compared the subclonal  
804 reconstruction solutions from each single region with the solutions obtained from subclonal  
805 reconstruction using all tumour regions. In addition to number of subclones predicted, we  
806 compared SNV and CNA clonality predictions between single- and multi-region reconstructions.  
807 For all SNVs that were identified in a single-region or its corresponding multi-region  
808 reconstruction, we calculated the proportion of SNVs in each of the following categories:

- 809 1. Multi- and single-region match: same SNV clonality in single- and multi-region.
- 810 2. Clonal in multi-region: SNV identified in both single- and multi-region  
811 reconstructions, but SNV is clonal in multi-region and subclonal in single-region.
- 812 3. Subclonal in multi-region: SNV identified in both single- and multi-region  
813 reconstructions, but SNV is subclonal in multi-region and clonal in single-region.
- 814 4. Unique in single-region: SNV only present in single-region reconstruction.
- 815 5. Unique in multi-region: SNV only present in multi-region reconstruction.

816 Similarly, all CNAs that were identified in a single-region reconstruction or its matching multi-  
817 region reconstruction were assigned to categories defined in a similar fashion. Additional  
818 separation was added for CNAs to distinguish between clonal and subclonal predictions.

## 819 **Data Visualization and Reporting**

820 Data was visualized using the R statistical environment (v3.2.5 or v3.5.3), and performed using  
821 the lattice (v0.20-34), latticeExtra (v0.6-28), VennDiagram (v1.6.21)<sup>55</sup> and BPG (v5.3.4)<sup>56</sup>  
822 packages. All boxplots show the median (center line), upper and lower quartiles (box limits), and

823 whiskers extend to the minimum and maximum values within 1.5 times the interquartile range  
824 (Tukey boxplots). Figures were compiled in Inkscape (v0.91). Standard deviation of the sample  
825 mean was reported for point estimates. All statistical tests were two-sided.

## 826 **List of abbreviations**

827 CCF - Cancer Cell Fraction  
828 CNAs - Copy Number Aberrations  
829 II - Intersect of SNVs and Intersect of CNAs  
830 IU - Intersect of SNVs and Union of CNAs  
831 MB - MuTect-Battenberg  
832 MCMC - Markov chain Monte Carlo  
833 MF - MuTect-FACETS  
834 MT - MuTect-TITAN  
835 SB - SomaticSniper-Battenberg  
836 SD - standard deviation  
837 SF - SomaticSniper-FACETS  
838 SNVs - Single Nucleotide Variants  
839 ST - SomaticSniper-TITAN  
840 UI - Union of SNVs and Intersect of CNAs  
841 UU - Union of SNVs and Union of CNAs  
842 VAF - Variant Allele Frequency  
843 WGS -Whole-genome Sequencing  
844

## 845 **Data Availability**

846 Published data analyzed in this study, publicly available with appropriate Data Access  
847 Compliance Office authorization, include:

848 WGS Data – Baca *et al.*, 2013: dbGaP, phs000447.v1.p1  
849 [[https://www.ncbi.nlm.nih.gov/projects/gap/cgi-bin/study.cgi?study\\_id=phs000447.v1.p1](https://www.ncbi.nlm.nih.gov/projects/gap/cgi-bin/study.cgi?study_id=phs000447.v1.p1)]<sup>35</sup>

850 WGS Data – Berger *et al.*, 2011: dbGaP, phs000330.v1.p1  
851 [[https://www.ncbi.nlm.nih.gov/projects/gap/cgi-bin/study.cgi?study\\_id=phs000330.v1.p1](https://www.ncbi.nlm.nih.gov/projects/gap/cgi-bin/study.cgi?study_id=phs000330.v1.p1)]<sup>36</sup>

852 WGS Data – CPC-GENE Espiritu *et al.*, 2018: EGA, EGAD00001001094  
853 [<https://www.ebi.ac.uk/ega/datasets/EGAD00001001094>]<sup>13</sup>

854 WGS Data – CPC-GENE Fraser *et al.*, 2017: EGA, EGAD00001001094  
855 [<https://www.ebi.ac.uk/ega/datasets/EGAD00001001094>]<sup>23</sup>

856 WGS Data – CPC-GENE Taylor *et al.*, 2017: EGA, EGAD00001002739  
857 [<https://www.ebi.ac.uk/ega/datasets/EGAD00001002739>]<sup>24</sup>

858 WGS Data – The Cancer Genome Atlas Research Network, 2015:  
859 <https://portal.gdc.cancer.gov/projects/TCGA-PRAD><sup>37</sup>

860 WGS Data – Weischenfeldt *et al.*, 2013: EGA, EGAS00001000400  
861 [<https://www.ebi.ac.uk/ega/studies/EGAS00001000400>]<sup>38</sup>

862 Data supporting the conclusions of this article is included within it and its additional files, and at:  
863 ICGC Data Portal under the project PRAD-CA [<https://dcc.icgc.org/projects/PRAD-CA>].

864 Source Data for Figures 4 is provided at: ICGC Data Portal under the project PRAD-CA  
865 [<https://dcc.icgc.org/projects/PRAD-CA>]. Data is available with appropriate ICGC Data Access  
866 Compliance Office approval.

867 Source data for Supplementary Figure 1 is provided in Supplementary Information.

868 Source data for Figures 2, 3, 6 and Supplementary Figures 2, 3A, 4C-F, 7, 8B, 9, 10, 11, 12, 13  
869 are provided in Supplementary Data.

870 Source data for Figures 5, 7 and Supplementary Figures 3B-E, 4A-B, 5, 6, 8AC, 14 are provided  
871 in Source Data.

## 872 **Code Availability**

873 No custom algorithms or software were developed or utilized in this study. Custom data analysis  
874 & data visualization code is available upon request.

875

## 876 **References**

- 877 1. Abbosh, C. *et al.* Phylogenetic ctDNA analysis depicts early-stage lung cancer evolution.  
878 *Nature* **545**, 446–451 (2017).
- 879 2. Jamal-Hanjani, M. *et al.* Tracking the Evolution of Non–Small-Cell Lung Cancer. *N.*  
880 *Engl. J. Med.* **376**, 2109–2121 (2017).
- 881 3. Turajlic, S. *et al.* Tracking Cancer Evolution Reveals Constrained Routes to Metastases:  
882 TRACERx Renal. *Cell* **173**, 581-594.e12 (2018).
- 883 4. Turajlic, S. *et al.* Deterministic Evolutionary Trajectories Influence Primary Tumor  
884 Growth: TRACERx Renal. *Cell* **173**, 595-610.e11 (2018).
- 885 5. Gudem, G. *et al.* The evolutionary history of lethal metastatic prostate cancer. *Nature*  
886 **520**, 353–357 (2015).
- 887 6. Gerlinger, M. *et al.* Intratumor Heterogeneity and Branched Evolution Revealed by  
888 Multiregion Sequencing. *N. Engl. J. Med.* **366**, 883–892 (2012).
- 889 7. Nik-Zainal, S. *et al.* The life history of 21 breast cancers. *Cell* **149**, 994–1007 (2012).
- 890 8. Boutros, P. C. *et al.* Spatial genomic heterogeneity within localized, multifocal prostate  
891 cancer. *Nat. Genet.* **47**, 736–745 (2015).
- 892 9. Cooper, C. S. *et al.* Analysis of the genetic phylogeny of multifocal prostate cancer  
893 identifies multiple independent clonal expansions in neoplastic and morphologically  
894 normal prostate tissue. *Nat. Genet.* **47**, 367–372 (2015).
- 895 10. Mitchell, T. J. *et al.* Timing the Landmark Events in the Evolution of Clear Cell Renal  
896 Cell Cancer: TRACERx Renal. *Cell* **173**, 611-623.e17 (2018).
- 897 11. Gerlinger, M. *et al.* Genomic architecture and evolution of clear cell renal cell carcinomas  
898 defined by multiregion sequencing. *Nat. Genet.* **46**, 225–233 (2014).
- 899 12. Alves, J. M., Prieto, T. & Posada, D. Multiregional Tumor Trees Are Not Phylogenies.  
900 *Trends in Cancer* **3**, 546–550 (2017).
- 901 13. Espiritu, S. M. G. *et al.* The Evolutionary Landscape of Localized Prostate Cancers Drives  
902 Clinical Aggression. *Cell* **173**, 1003-1013.e15 (2018).



- 903 14. Jiao, W., Vembu, S., Deshwar, A. G., Stein, L. & Morris, Q. Inferring clonal evolution of  
904 tumors from single nucleotide somatic mutations. *BMC Bioinformatics* **15**, 35 (2014).
- 905 15. Deshwar, A. G. *et al.* PhyloWGS: Reconstructing subclonal composition and evolution  
906 from whole-genome sequencing of tumors. *Genome Biol.* **16**, 35 (2015).
- 907 16. Bolli, N. *et al.* Heterogeneity of genomic evolution and mutational profiles in multiple  
908 myeloma. *Nat. Commun.* **5**, (2014).
- 909 17. Roth, A. *et al.* PyClone: Statistical inference of clonal population structure in cancer. *Nat.*  
910 *Methods* **11**, 396–398 (2014).
- 911 18. Zare, H. *et al.* Inferring Clonal Composition from Multiple Sections of a Breast Cancer.  
912 *PLoS Comput. Biol.* **10**, e1003703 (2014).
- 913 19. Oesper, L., Mahmoody, A. & Raphael, B. J. THetA: Inferring intra-tumor heterogeneity  
914 from high-throughput DNA sequencing data. *Genome Biol.* **14**, R80 (2013).
- 915 20. Miller, C. A. *et al.* SciClone: Inferring Clonal Architecture and Tracking the Spatial and  
916 Temporal Patterns of Tumor Evolution. *PLoS Comput. Biol.* **10**, 1003665 (2014).
- 917 21. Jiang, Y., Qiu, Y., Minn, A. J. & Zhang, N. R. Assessing intratumor heterogeneity and  
918 tracking longitudinal and spatial clonal evolutionary history by next-generation  
919 sequencing. *Proc. Natl. Acad. Sci.* **113**, E5528–E5537 (2016).
- 920 22. Dentre, S. C. *et al.* Portraits of genetic intra-tumour heterogeneity and subclonal selection  
921 across cancer types. *bioRxiv* 312041 (2018) doi:10.1101/312041.
- 922 23. Fraser, M. *et al.* Genomic hallmarks of localized, non-indolent prostate cancer. *Nature*  
923 **541**, 359–364 (2017).
- 924 24. Taylor, R. A. *et al.* Germline BRCA2 mutations drive prostate cancers with distinct  
925 evolutionary trajectories. *Nat. Commun.* **8**, 13671 (2017).
- 926 25. Ha, G. *et al.* TITAN: Inference of copy number architectures in clonal cell populations  
927 from tumor whole-genome sequence data. *Genome Res.* **24**, 1881–1893 (2014).
- 928 26. Larson, D. E. *et al.* Somaticsniper: Identification of somatic point mutations in whole  
929 genome sequencing data. *Bioinformatics* **28**, 311–317 (2012).

- 930 27. Cibulskis, K. *et al.* Sensitive detection of somatic point mutations in impure and  
931 heterogeneous cancer samples. *Nat. Biotechnol.* **31**, 213–219 (2013).
- 932 28. Shen, R. & Seshan, V. E. FACETS: allele-specific copy number and clonal heterogeneity  
933 analysis tool for high-throughput DNA sequencing. *Nucleic Acids Res.* **44**, e131–e131  
934 (2016).
- 935 29. Qi, Y., Pradhan, D. & El-Kebir, M. Implications of non-uniqueness in phylogenetic  
936 deconvolution of bulk DNA samples of tumors. *Algorithms Mol. Biol.* **14**, 19 (2019).
- 937 30. Gerstung, M. *et al.* The evolutionary history of 2,658 cancers. *Nature* **578**, 122–128  
938 (2020).
- 939 31. Ewing, A. D. *et al.* Combining tumor genome simulation with crowdsourcing to  
940 benchmark somatic single-nucleotide-variant detection. *Nat. Methods* **12**, 623–630 (2015).
- 941 32. Dentre, S. C., Wedge, D. C. & Van Loo, P. Principles of Reconstructing the Subclonal  
942 Architecture of Cancers. *Cold Spring Harb. Perspect. Med.* **7**, a026625 (2017).
- 943 33. Sun, R. *et al.* Between-region genetic divergence reflects the mode and tempo of tumor  
944 evolution. *Nat. Genet.* **49**, 1015–1024 (2017).
- 945 34. Salcedo, A. *et al.* A community effort to create standards for evaluating tumor subclonal  
946 reconstruction. *Nat. Biotechnol.* **38**, 97–107 (2020).
- 947 35. Baca, S. C. *et al.* Punctuated evolution of prostate cancer genomes. *Cell* **153**, 666–677  
948 (2013).
- 949 36. Berger, M. F. *et al.* The genomic complexity of primary human prostate cancer. *Nature*  
950 **470**, 214–220 (2011).
- 951 37. The Cancer Genome Atlas Research Network. The Molecular Taxonomy of Primary  
952 Prostate Cancer. *Cell* **163**, 1011–1025 (2015).
- 953 38. Weischenfeldt, J. *et al.* Integrative Genomic Analyses Reveal an Androgen-Driven  
954 Somatic Alteration Landscape in Early-Onset Prostate Cancer. *Cancer Cell* **23**, 159–170  
955 (2013).
- 956 39. Li, H. & Durbin, R. Fast and accurate short read alignment with Burrows-Wheeler  
957 transform. *Bioinformatics* **25**, 1754–1760 (2009).

- 958 40. McKenna, A. *et al.* The Genome Analysis Toolkit: a MapReduce framework for analyzing  
959 next-generation DNA sequencing data. *Genome Res.* **20**, 1297–303 (2010).
- 960 41. Li, H. *et al.* The Sequence Alignment/Map format and SAMtools. *Bioinformatics* **25**,  
961 2078–2079 (2009).
- 962 42. Cibulskis, K. *et al.* ContEst: Estimating cross-contamination of human samples in next-  
963 generation sequencing data. *Bioinformatics* **27**, 2601–2602 (2011).
- 964 43. Van Loo, P. *et al.* Allele-specific copy number analysis of tumors. *Proc. Natl. Acad. Sci.*  
965 **107**, 16910–16915 (2010).
- 966 44. Jafar Taghiyar, M. *et al.* Kronos: A workflow assembler for genome analytics and  
967 informatics. *Gigascience* **6**, 1–10 (2017).
- 968 45. Langmead, B., Trapnell, C., Pop, M. & Salzberg, S. L. Ultrafast and memory-efficient  
969 alignment of short DNA sequences to the human genome. *Genome Biol.* **10**, R25 (2009).
- 970 46. Ding, J. *et al.* Feature-based classifiers for somatic mutation detection in tumour-normal  
971 paired sequencing data. *Bioinformatics* **28**, 167–175 (2012).
- 972 47. Sherry, S. T. dbSNP: the NCBI database of genetic variation. *Nucleic Acids Res.* **29**, 308–  
973 311 (2001).
- 974 48. Forbes, S. A. *et al.* COSMIC: Exploring the world’s knowledge of somatic mutations in  
975 human cancer. *Nucleic Acids Res.* **43**, D805–D811 (2015).
- 976 49. Wang, K., Li, M. & Hakonarson, H. ANNOVAR: Functional annotation of genetic  
977 variants from high-throughput sequencing data. *Nucleic Acids Res.* **38**, e164–e164 (2010).
- 978 50. Lawrence, M. *et al.* Software for Computing and Annotating Genomic Ranges. *PLoS*  
979 *Comput. Biol.* **9**, e1003118 (2013).
- 980 51. Quinlan, A. R. & Hall, I. M. BEDTools: A flexible suite of utilities for comparing  
981 genomic features. *Bioinformatics* **26**, 841–842 (2010).
- 982 52. Haider, S. *et al.* A bedr way of genomic interval processing. *Source Code Biol. Med.* **11**,  
983 14 (2016).
- 984 53. Reimand, J., Kull, M., Peterson, H., Hansen, J. & Vilo, J. G:Profiler-a web-based toolset

- 985           for functional profiling of gene lists from large-scale experiments. *Nucleic Acids Res.* **35**,  
986           W193-200 (2007).
- 987 54. Shannon, P. *et al.* Cytoscape: A software Environment for integrated models of  
988           biomolecular interaction networks. *Genome Res.* **13**, 2498–2504 (2003).
- 989 55. Chen, H. & Boutros, P. C. VennDiagram: A package for the generation of highly-  
990           customizable Venn and Euler diagrams in R. *BMC Bioinformatics* **12**, 35 (2011).
- 991 56. P'ng, C. *et al.* BPG: Seamless, automated and interactive visualization of scientific data.  
992           *BMC Bioinformatics* **20**, 42 (2019).
- 993
- 994

995

996

997

## 998 **Acknowledgements**

999 The authors thank Dr. Reimand (University of Toronto) for technical support. We also thank all  
1000 members of the Boutros and Kislinger labs for helpful suggestions and technical support.

1001 This work was supported by Prostate Cancer Canada and is proudly funded by the Movember  
1002 Foundation - Grant #RS2014-01 to PCB. PCB was supported by a Terry Fox Research Institute  
1003 and CIHR New Investigator Awards. This work was supported by NSERC Discovery Grants to  
1004 QDM and PCB. This research is funded by the Canadian Cancer Society (grant #705649) and a  
1005 Project Grant from CIHR. This work was funded by the Government of Canada through Genome  
1006 Canada (OGI-125). VB, LYL and AS were supported by Fellowships from the Canadian  
1007 Institutes of Health Research. The results described here are in part based upon data generated by  
1008 the TCGA Research Network: <http://cancergenome.nih.gov/>. This work was supported by the  
1009 NIH/NCI under awards P30CA016042, 1U01CA214194-01, 1U24CA248265-01 and  
1010 1R01CA244729-01.

## 1011 **Author Contributions**

1012 Initiated the Project: VB, LYL, QDM, PCB  
1013 Data Analyses: LYL, VB, SMGE  
1014 Data Visualization: LYL, VB, AS  
1015 Supervised Research: QDM, TK, PCB  
1016 Wrote the First Draft of the Manuscript: VB, LYL, PCB  
1017 Approved the Manuscript: All Authors

## 1018 **Competing Interests**

1019 All authors declare that they have no conflicts of interest.

## 1020 **Ethics Compliance**

1021 All tumour samples in this study were obtained with patient informed consent, with approvals by  
1022 the University Health Network Institutional Research Ethics Board, the Centre Hospitalier  
1023 Universitaire de Québec Institutional Research Ethics Board and the University of California Los  
1024 Angeles Institutional Research Ethics Board, and following ICGC guidelines.

1025

1026

1027

1028

1029

1030

1031

1032

1033

1034

1035

## 1036 **Figure Legends**

### 1037 **Figure 1 – Reconstruction Workflow and Experimental Design**

1038 Raw sequencing data from the tumour and normal samples were aligned against the hg19 build  
1039 of the human genome using bwa-aln and GATK. Somatic SNVs were detected using  
1040 SomaticSniper and MuTect and annotated for function. Somatic CNAs were detected using  
1041 TITAN, Battenberg and FACETS and filtered. All single-region tumour samples had their  
1042 subclonal architectures reconstructed using sixteen pipelines combining one of SomaticSniper  
1043 and MuTect, one of Battenberg and TITAN, and one of PyClone, PhyloWGS, DPClust and  
1044 SciClone. For tumours with samples from multiple regions, reconstructions of subclonal  
1045 architectures were performed by considering each individual region alone and by considering  
1046 samples from all regions together using eighteen pipelines. SNV, single nucleotide variant;  
1047 CNA, copy number aberration; WGS, whole-genome sequencing.

### 1048 **Figure 2 – Cellularity Estimates**

1049 Cellularity of samples as estimated by the CNA detection tool and by subclonal reconstruction  
1050 pipelines using the CNA detection tool **a** TITAN and **b** Battenberg. Each dot represents the  
1051 estimate for a sample and colors delineate subclonal reconstruction algorithms. Mutation  
1052 detection tool combinations using Battenberg include SomaticSniper-Battenberg and MuTect-  
1053 Battenberg, and mutation detection tool combinations using TITAN include SomaticSniper-  
1054 TITAN and MuTect-TITAN. Samples are ordered by cellularity estimates by the CNA detection  
1055 tool. The horizontal line indicates CNA detection tool estimated cellularity 0.75. TITAN: n=293  
1056 biologically independent samples; SomaticSniper-TITAN-PhyloWGS: n=289; SomaticSniper-  
1057 TITAN-PyClone: n=221; SomaticSniper-TITAN-DPClust: n=293; SomaticSniper-TITAN-  
1058 SciClone: n=100; MuTect-TITAN-PhyloWGS: n=289; MuTect-TITAN-PyClone: n=221;  
1059 MuTect-TITAN-DPClust: n=283; MuTect-TITAN-SciClone: n=182. TITAN-estimated  
1060 cellularity > 0.75: n=73; SomaticSniper-TITAN-PhyloWGS: n=69; SomaticSniper-TITAN-  
1061 PyClone: n=54; SomaticSniper-TITAN-DPClust: n=73; SomaticSniper-TITAN-SciClone: n=20;  
1062 MuTect-TITAN-PhyloWGS: n=72; MuTect-TITAN-PyClone: n=53; MuTect-TITAN-DPClust:  
1063 n=70; MuTect-TITAN-SciClone: n=50. Battenberg: n=293; SomaticSniper-Battenberg-  
1064 PhyloWGS: n=287; SomaticSniper-Battenberg-PyClone: n=277; SomaticSniper-Battenberg-  
1065 DPClust: n=291; SomaticSniper-Battenberg-SciClone: n=150; MuTect-Battenberg-PhyloWGS:

1066 n=281; MuTect-Battenberg-PyClone: n=262; MuTect-Battenberg-DPCLust: n=288; MuTect-  
1067 Battenberg-SciClone: n=257. Battenberg-estimated cellularity > 0.75: n=47; SomaticSniper-  
1068 Battenberg-PhyloWGS: n=44; SomaticSniper-Battenberg-PyClone: n=38; SomaticSniper-  
1069 Battenberg-DPCLust: n=47; SomaticSniper-Battenberg-SciClone: n=18; MuTect-Battenberg-  
1070 PhyloWGS: n=42; MuTect-Battenberg-PyClone: n=37; MuTect-Battenberg-DPCLust: n=46;  
1071 MuTect-Battenberg-SciClone: n=40.

### 1072 **Figure 3 – Number of Subclones Detected**

1073 Each panel compares the number of subclones predicted for each sample by subclonal  
1074 reconstruction pipelines using the same mutation detection tool combinations **a** SomaticSniper-  
1075 Battenberg, **b** SomaticSniper-TITAN, **c** MuTect-Battenberg and **d** MuTect-TITAN. Each marker  
1076 represents the prediction for a sample by a successful pipeline execution, and the color of the  
1077 marker represents the subclonal reconstruction algorithm used in the pipeline. In cases where  
1078 algorithms predicted the same number of subclones, the markers were randomly overlaid.  
1079 Background color indicates the number of unique subclone number predictions across algorithms  
1080 that successfully executed for that sample. SomaticSniper-Battenberg: n=291 biologically  
1081 independent samples; SomaticSniper-TITAN: n=293; MuTect-Battenberg: n=288; MuTect-  
1082 TITAN: n=290.

### 1083 **Figure 4 – SomaticSniper and MuTect**

1084 **a** Density plots of variant allele frequencies for SNVs across all samples that were detected by  
1085 both SomaticSniper and MuTect (Intersect, short dash orange line), only detected by MuTect  
1086 (MuTect Unique, solid green line) and only detected by SomaticSniper (SomaticSniper Unique,  
1087 long dash purple line). VAF, variant allele frequency. **b** Trinucleotide profile of SNVs that were  
1088 detected by both SomaticSniper and MuTect, where the number of SNVs was normalized by the  
1089 expected number of each trinucleotide context across the hg19 genome. Trinucleotide profiles  
1090 for **c** SNVs only detected by SomaticSniper and **d** SNVs only detected by MuTect. Colors in the  
1091 covariate bar indicate the 5', reference, alternative and 3' nucleotides in each trinucleotide  
1092 context. Ref, reference nucleotide; Alt, alternative nucleotide of variant. Number of SNVs across  
1093 all samples in Intersect: n=453,855 independent observations; SomaticSniper Unique n=198,623;  
1094 MuTect Unique n=2,801,546.



## 1095 **Figure 5 – Clonal and Subclonal SNVs**

1096 Total number of clonal and subclonal SNVs identified by pipelines using **a** DPCLust, **b**  
1097 PhyloWGS, **c** PyClone and **d** SciClone. Each stacked bar represents one sample and samples are  
1098 ordered based on the total number of SNVs identified by the pipeline using SomaticSniper and  
1099 TITAN. Color of the stacked bar reflects the clonality of the SNVs it represents (clonal green,  
1100 subclonal blue). Only samples with successful executions across all four pipelines using the  
1101 subclonal reconstruction algorithm are presented. DPCLust: n=281 biologically independent  
1102 samples; PhyloWGS n=274; PyClone n=200; SciClone n=86. **e** Jaccard index of pipeline-  
1103 identified clonal and subclonal SNVs. Each marker (delineated by shape and color) represents a  
1104 pipeline pair that is compared, and the *x*- and *y*- axis show subclonal and clonal mean SNV  
1105 Jaccard indices across samples shared between the pipeline pair, respectively, with error bars  
1106 indicating one standard deviation. Dashed diagonal line represents the  $y = x$  line. ST,  
1107 SomaticSniper-TITAN; MT, MuTect-TITAN; SB, SomaticSniper-Battenberg; MB, MuTect-  
1108 Battenberg. DPCLust ST *vs.* SB: n=291 independent observations; DPCLust ST *vs.* MT: n=283;  
1109 DPCLust ST *vs.* MB: n=288; DPCLust SB *vs.* MT: n=281; DPCLust SB *vs.* MB: n=288; DPCLust  
1110 MT *vs.* MB: n=281; PhyloWGS ST *vs.* SB: n=288; PhyloWGS ST *vs.* MT: n=290; PhyloWGS  
1111 ST *vs.* MB: n=283; PhyloWGS SB *vs.* MT: n=285; PhyloWGS SB *vs.* MB: n=281; PhyloWGS  
1112 MT *vs.* MB: n=283; PyClone ST *vs.* SB: n=216; PyClone ST *vs.* MT: n=209; PyClone ST *vs.*  
1113 MB: n=202; PyClone SB *vs.* MT: n=213; PyClone SB *vs.* MB: n=256; PyClone MT *vs.* MB:  
1114 n=212; SciClone ST *vs.* SB: n=88; SciClone ST *vs.* MT: n=96; SciClone ST *vs.* MB: n=92;  
1115 SciClone SB *vs.* MT: n=116; SciClone SB *vs.* MB: n=147; SciClone MT *vs.* MB: n=174. Source  
1116 data are provided as a Source Data file.

## 1117 **Figure 6 - Single- and Multi-Region Subclone Number Prediction**

1118 Number of subclones predicted for each tumour from multi-region reconstruction (brown  
1119 diamond) and reconstructions of each of the individual regions (circle), including the index  
1120 lesion (pink circle) by pipelines using **a** PhyloWGS and **b** PyClone. Missing values indicate a  
1121 failed reconstruction. Multi-region reconstruction SomaticSniper-TITAN-PhyloWGS: n=10  
1122 biologically independent samples; SomaticSniper-FACETS-PhyloWGS: n=8; SomaticSniper-  
1123 Battenberg-PhyloWGS: n=9; MuTect-TITAN-PhyloWGS: n=10; MuTect-FACETS-PhyloWGS:  
1124 n=8; MuTect-Battenberg-PhyloWGS: n=10; SomaticSniper-TITAN-PyClone: n=1;  
1125 SomaticSniper-FACETS-PyClone: n=6; SomaticSniper-Battenberg-PyClone: n=5; MuTect-

1126 TITAN-PyClone: n=5; MuTect-FACETS-PyClone: n=9; MuTect-Battenberg-PyClone: n=7.  
1127 Single-region reconstruction SomaticSniper-TITAN-PhyloWGS: n=30; SomaticSniper-  
1128 FACETS-PhyloWGS: n=26; SomaticSniper-Battenberg-PhyloWGS: n=30; MuTect-TITAN-  
1129 PhyloWGS: n=30; MuTect-FACETS-PhyloWGS: n=26; MuTect-Battenberg-PhyloWGS: n=28;  
1130 SomaticSniper-TITAN-PyClone: n=18; SomaticSniper-FACETS-PyClone: n=26;  
1131 SomaticSniper-Battenberg-PyClone: n=25; MuTect-TITAN-PyClone: n=25; MuTect-FACETS-  
1132 PyClone: n=25; MuTect-Battenberg-PyClone: n=28.

### 1133 **Figure 7 - Single- and Multi-Region SNV Clonality Prediction**

1134 Comparison of the clonality of SNVs identified by single-region and multi-region  
1135 reconstructions by pipelines using **a** PhyloWGS and **b** PyClone. Each stacked bar represents a  
1136 single-region and covariate bar color indicates the identity of the sample. Missing bars indicated  
1137 failed reconstructions, either single- or multi-region. SNVs were grouped into five categories by  
1138 color of stacked bar plot: ‘Match in Multi and Single’ if the SNV was predicted to be the same  
1139 clonality in single- and multi-region reconstructions, ‘Clonal in Multi-region’ if the SNV was  
1140 clonal in multi-region reconstruction but subclonal in single-region reconstruction, and  
1141 ‘Subclonal in Multi-region’ if *vice versa*. If a SNV was only analyzed in single-region  
1142 reconstruction, it was ‘Unique in Single-region’, while SNVs only analyzed in multi-region  
1143 reconstruction were ‘Unique in Multi-region’. SomaticSniper-TITAN-PhyloWGS: n=30  
1144 biologically independent samples; SomaticSniper-FACETS-PhyloWGS: n=24; SomaticSniper-  
1145 Battenberg-PhyloWGS: n=28; MuTect-TITAN-PhyloWGS: n=30; MuTect-FACETS-  
1146 PhyloWGS: n=24; MuTect-Battenberg-PhyloWGS: n=28. SomaticSniper-TITAN-PyClone: n=2;  
1147 SomaticSniper-FACETS-PyClone: n=18; SomaticSniper-Battenberg-PyClone: n=13; MuTect-  
1148 TITAN-PyClone: n=15; MuTect-FACETS-PyClone: n=25; MuTect-Battenberg-PyClone: n=19.  
1149 Source data are provided as a Source Data file.

1150

Figure 1

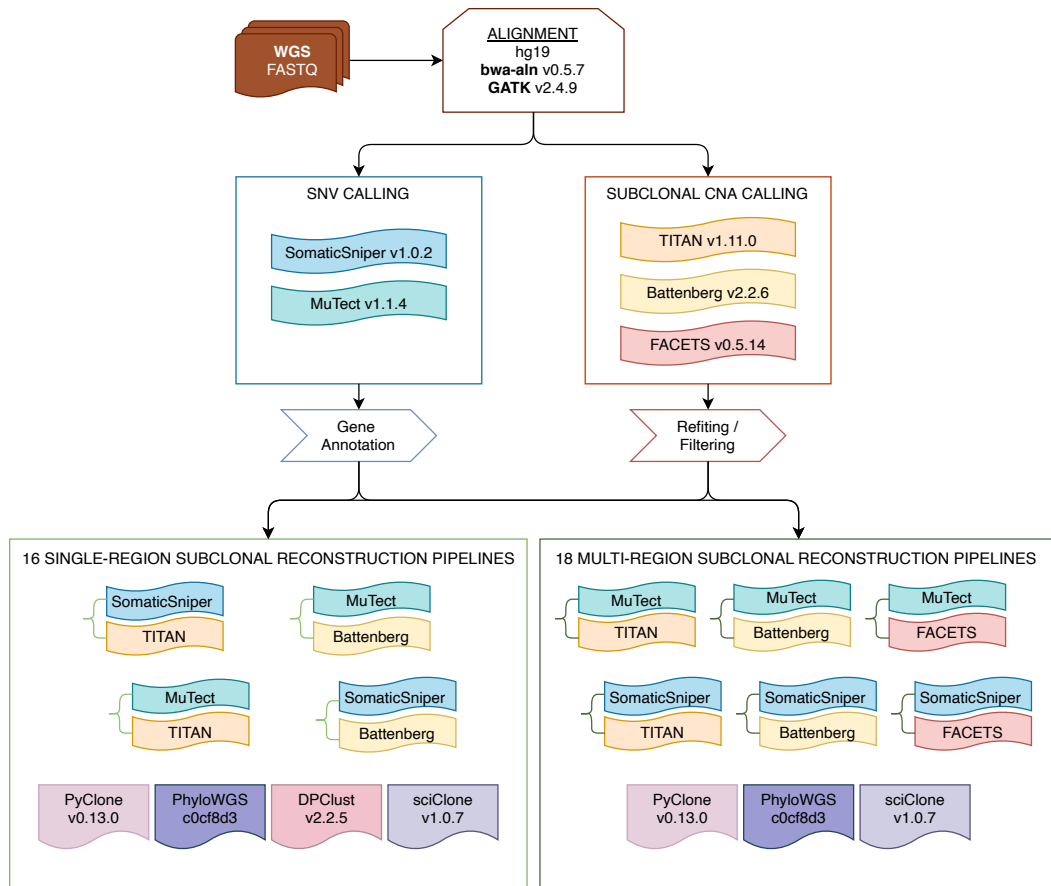

Figure 2

a

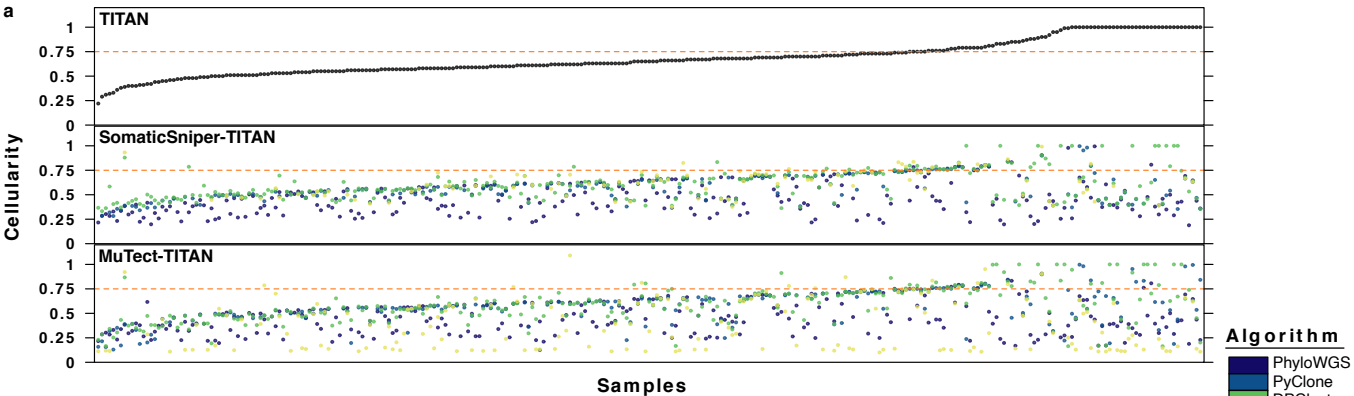

b

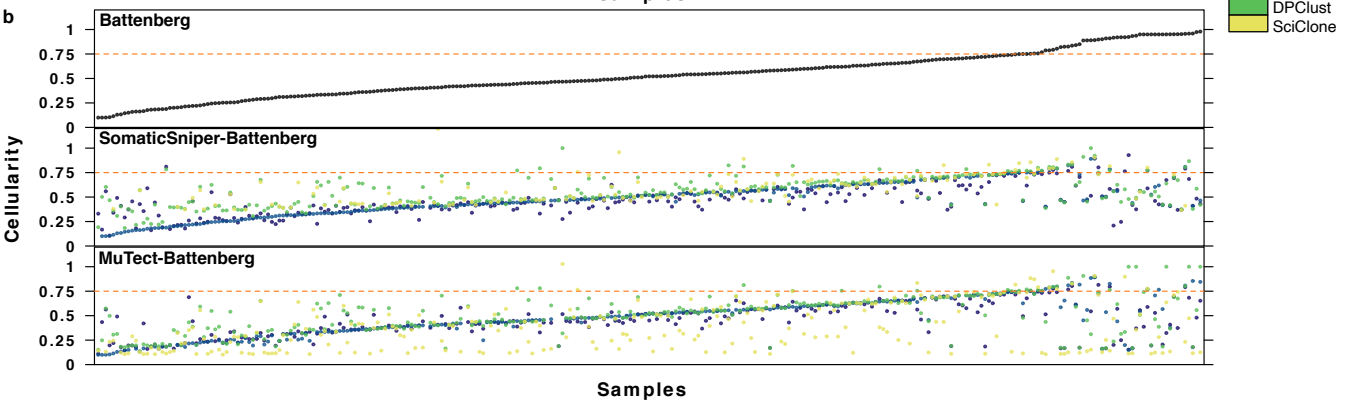

**Figure 3****a****SomaticSniper-Battenberg**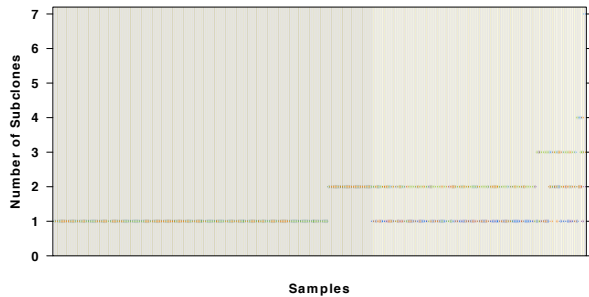**b****SomaticSniper-TITAN**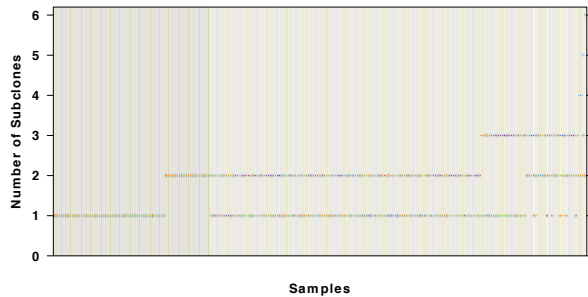**Algorithm**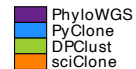**Number of Unique Predictions**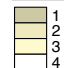**c****MuTect-Battenberg**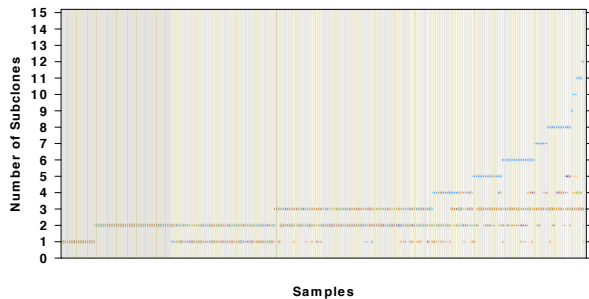**d****MuTect-TITAN**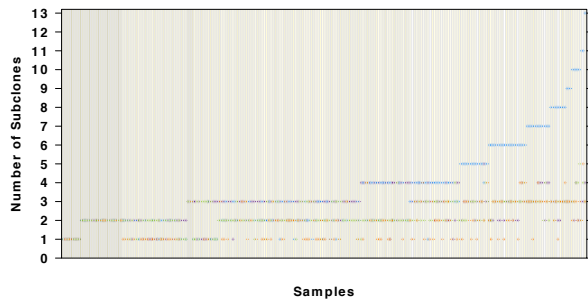

Figure 4

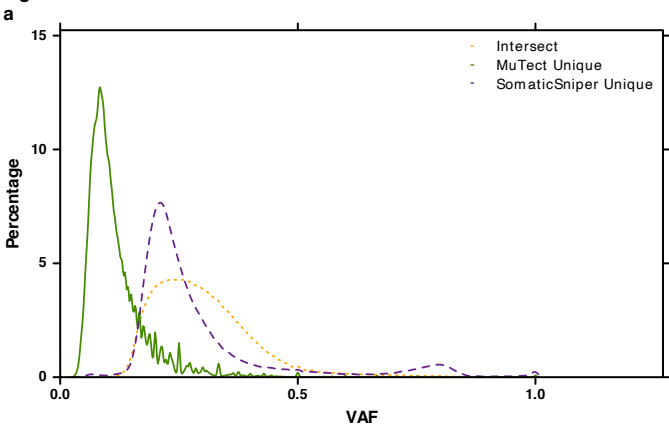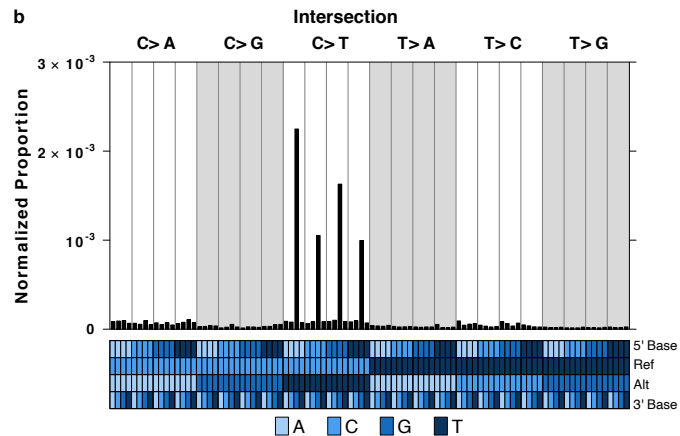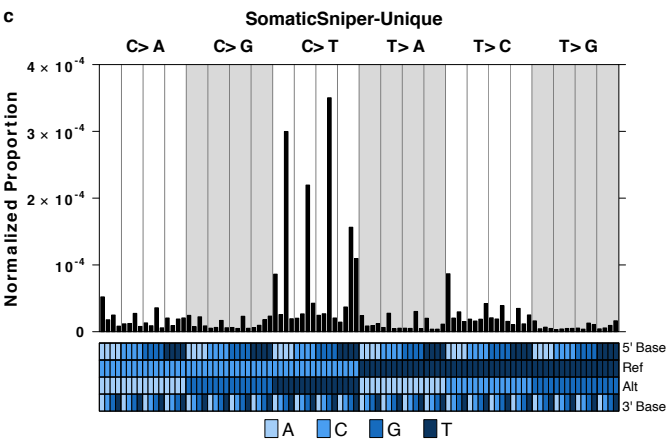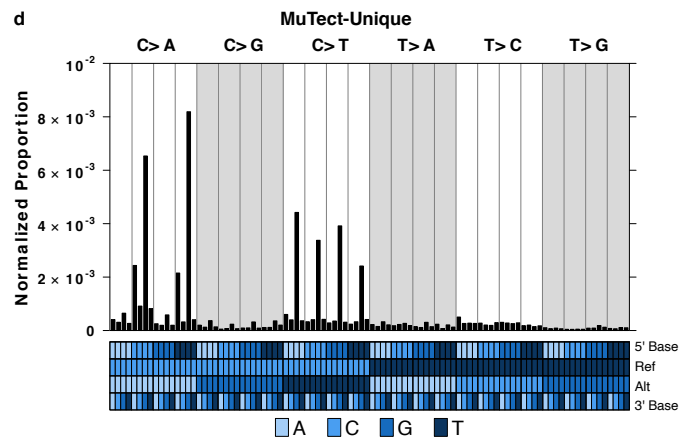

Figure 5

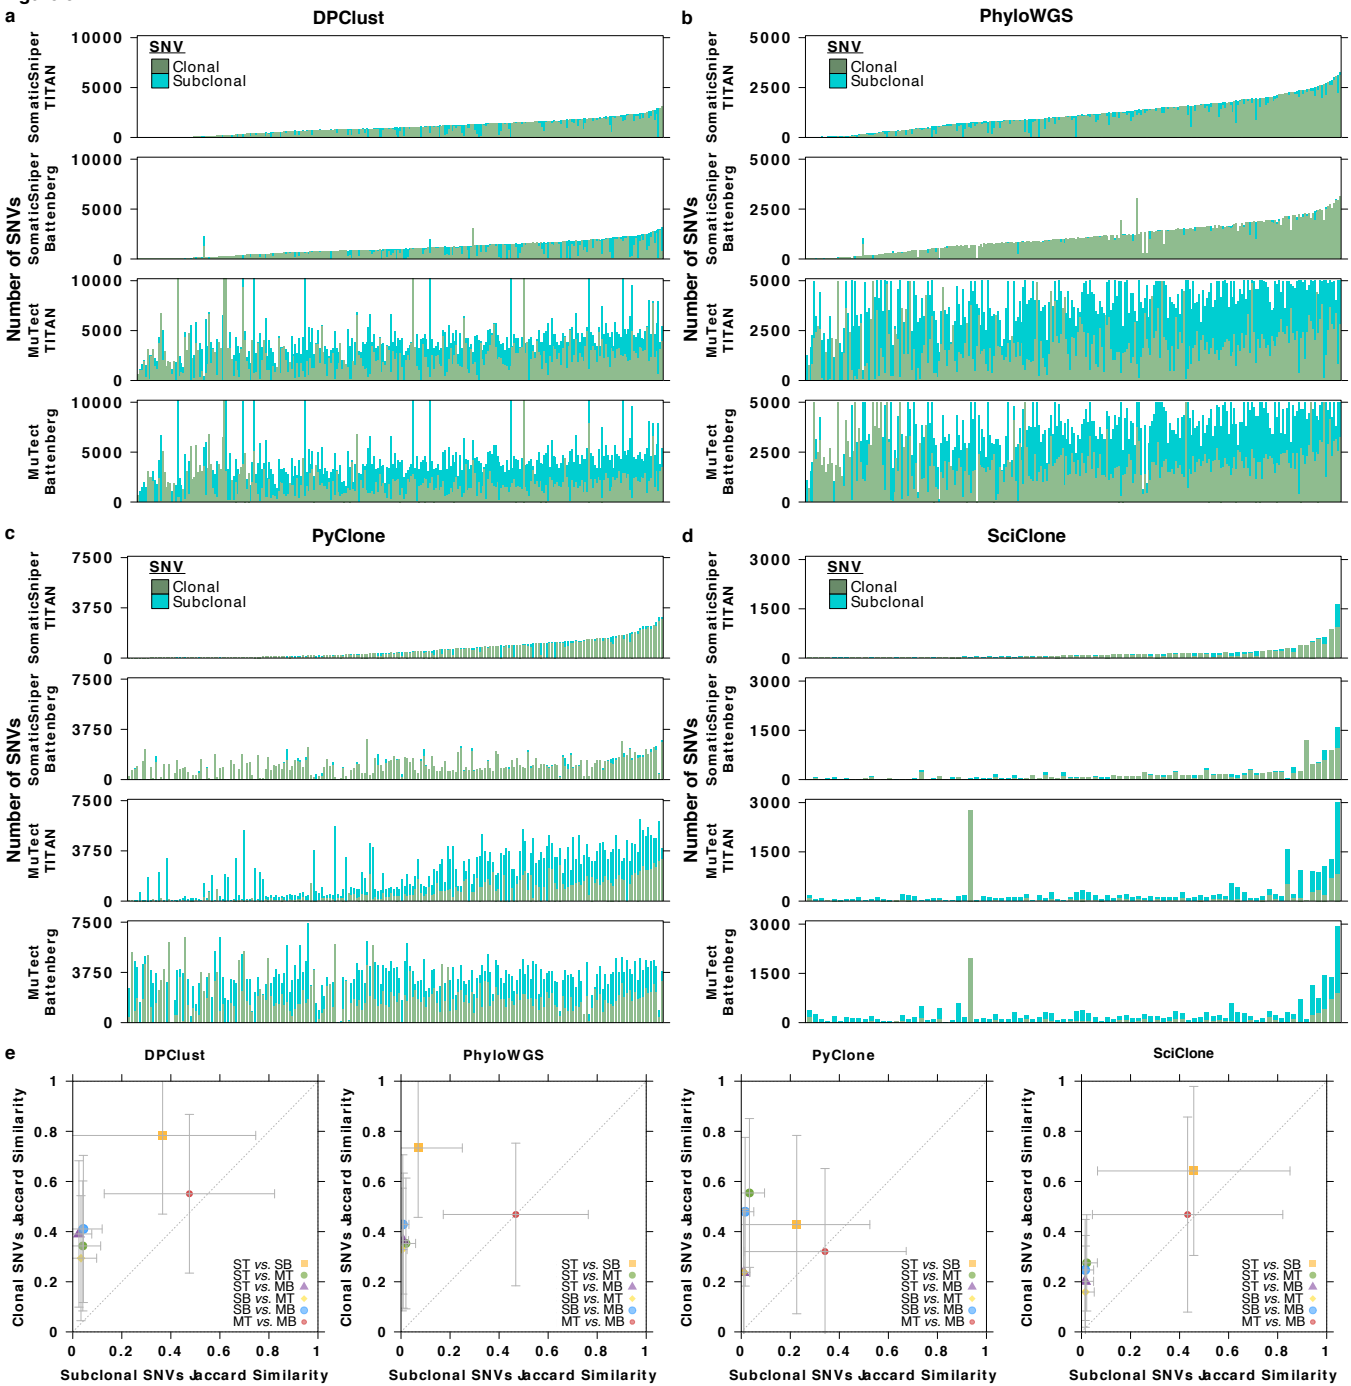

Figure 6

a

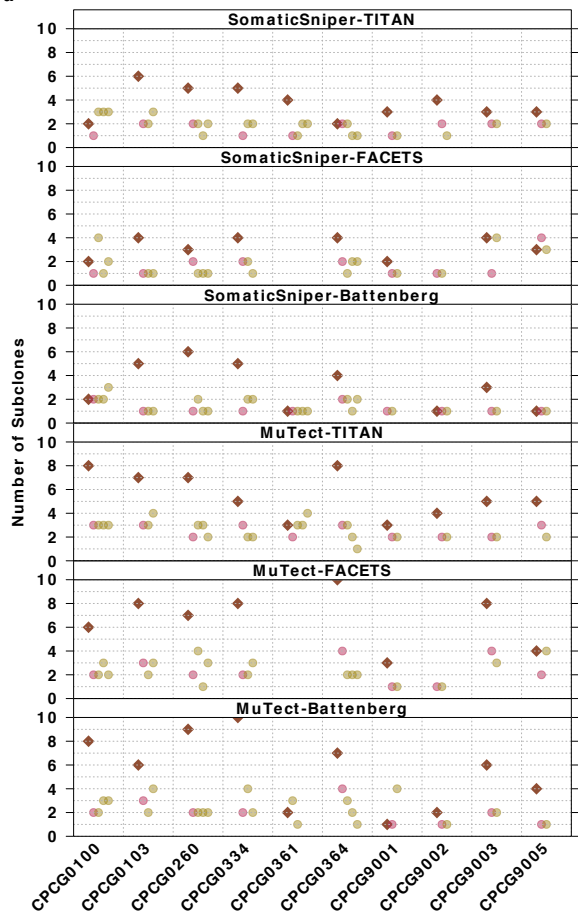

b

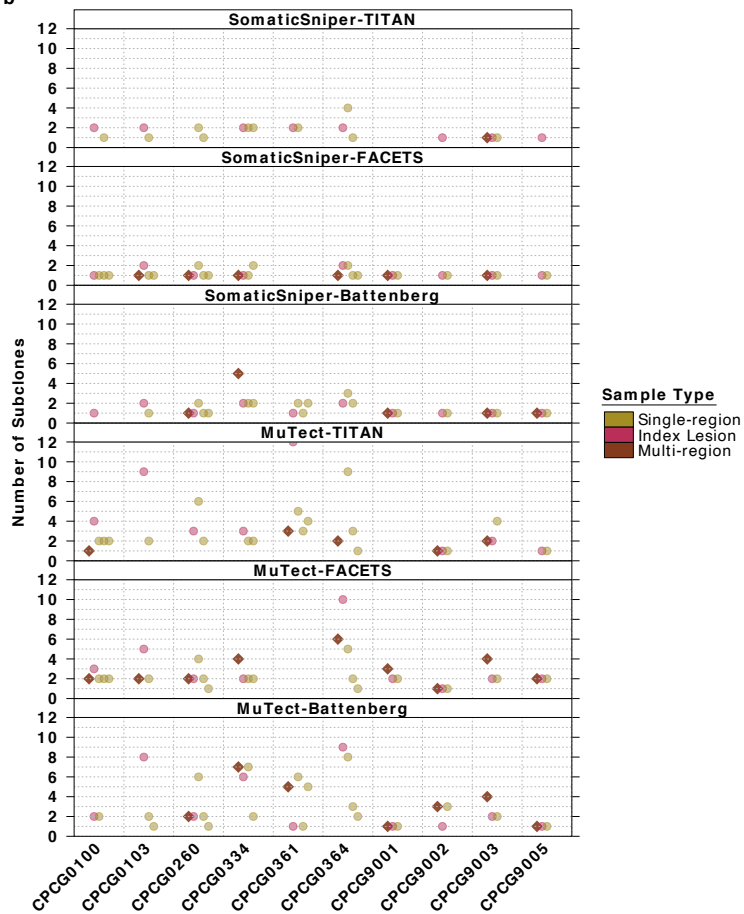



Figure 7

a

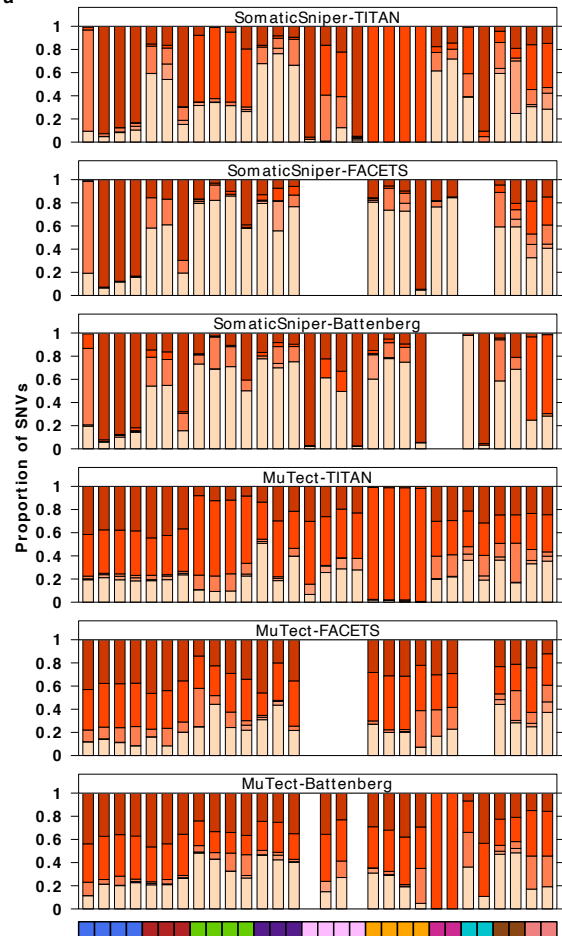

b

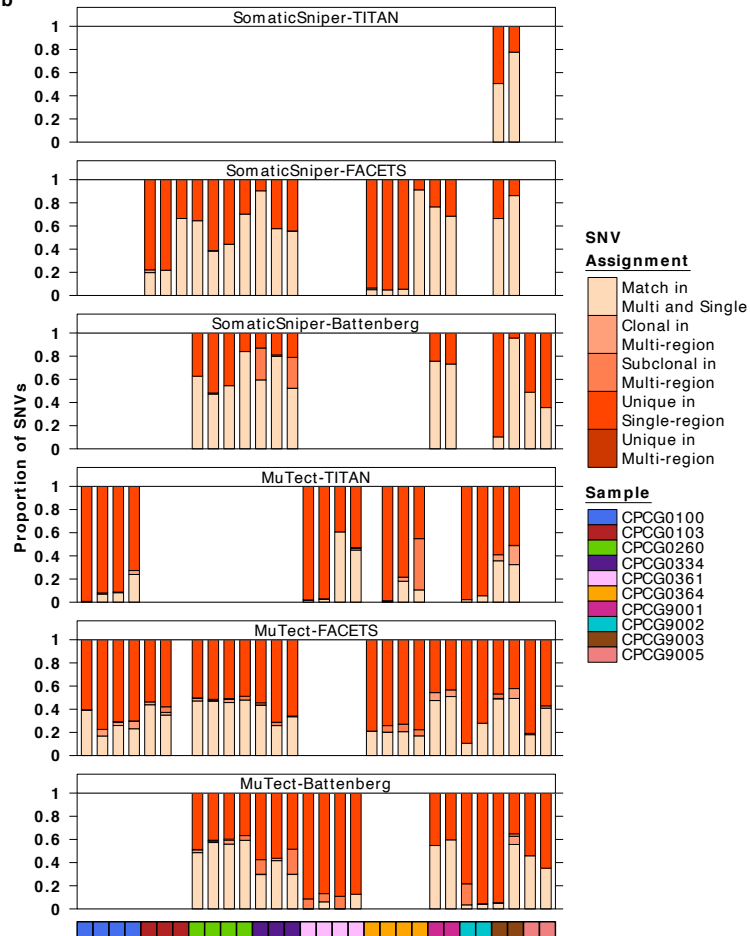

Source: https://www.biorxiv.org/content/10.1101/418780v5.full.pdf
