# Supplementary material for: Quantifying the Influence of Mutation Detection on Tumour Subclonal Reconstruction
Source: bioRxiv or medRxiv preprint supplement (doi:10.1101/418780), 2020-10-16

# Baca\_01-28\_T\_wgs

## SomaticSniper-Battenberg

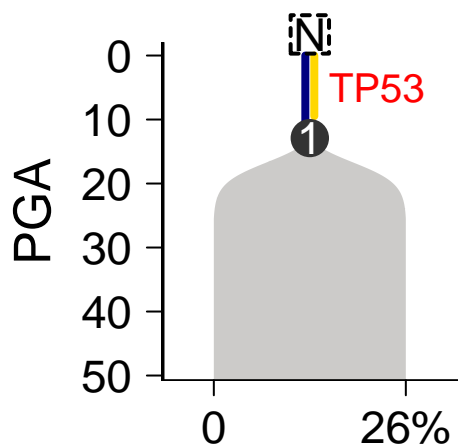

## SomaticSniper-TITAN

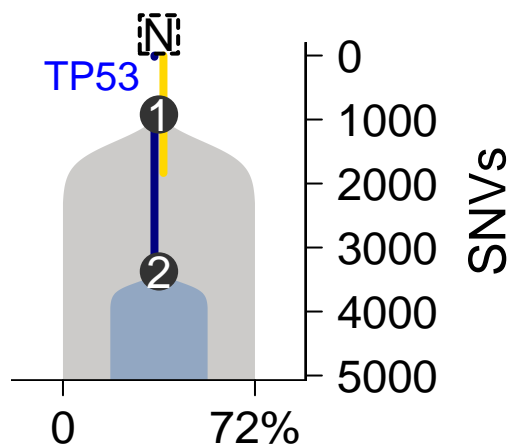

## MuTect-Battenberg

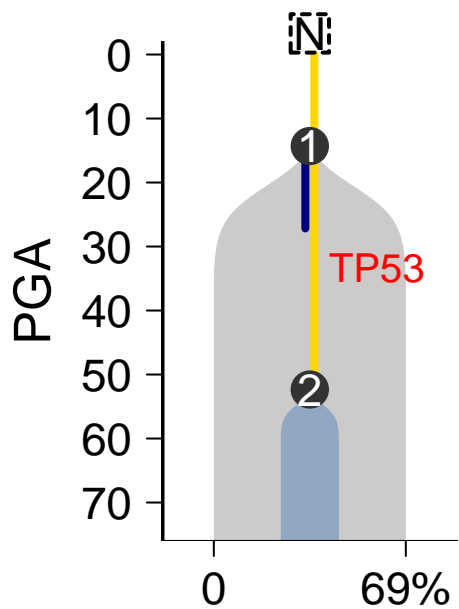

## MuTect-TITAN

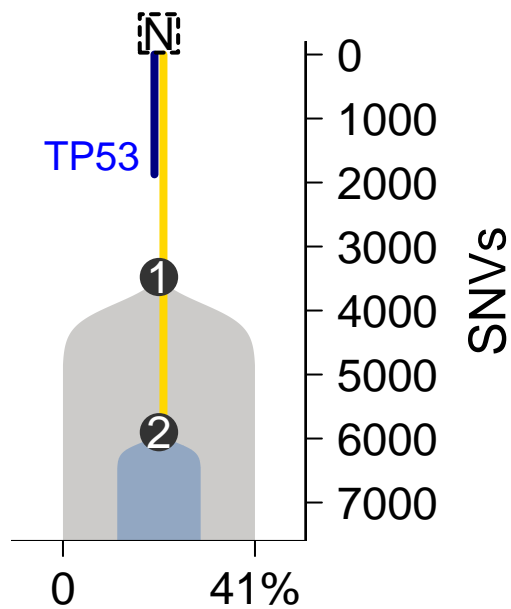

# Baca\_02-1431\_T\_wgs

## SomaticSniper-Battenberg

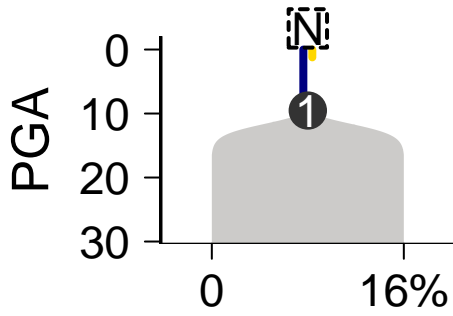

## SomaticSniper-TITAN

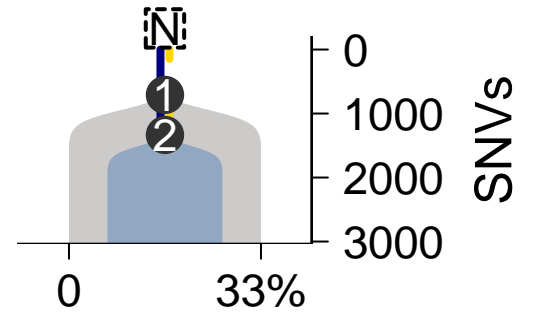

## MuTect-Battenberg

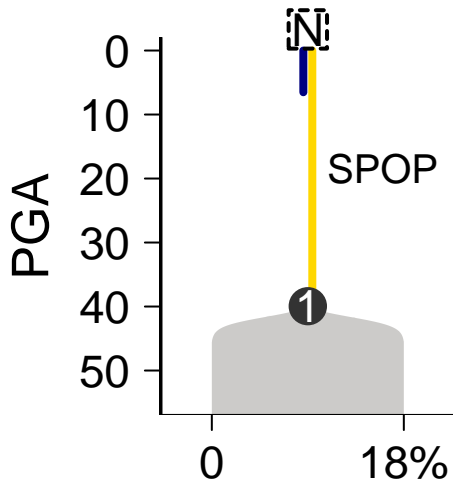

## MuTect-TITAN

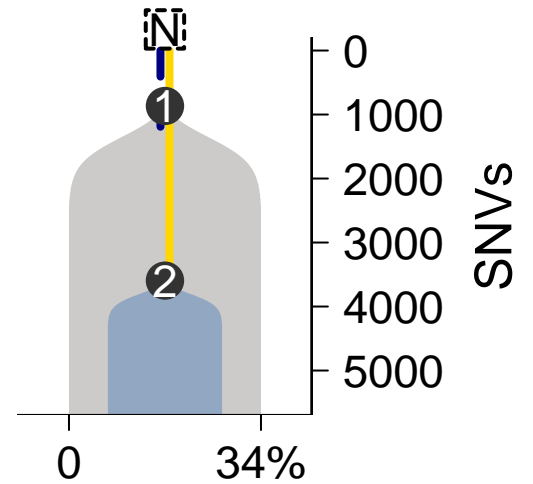

# Baca\_03-1426\_T\_wgs

## SomaticSniper-Battenberg

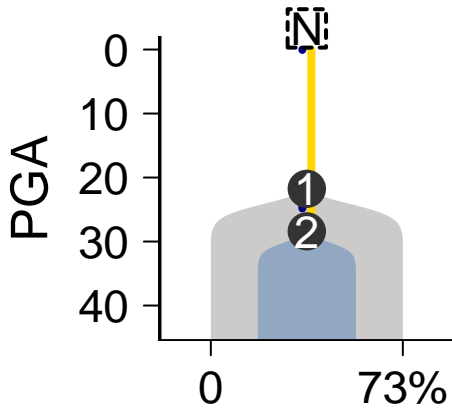

## SomaticSniper-TITAN

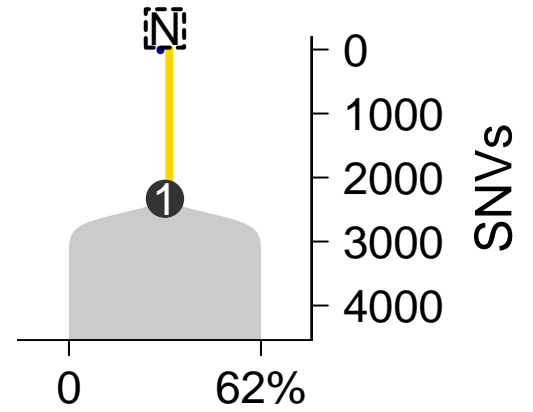

## MuTect-Battenberg

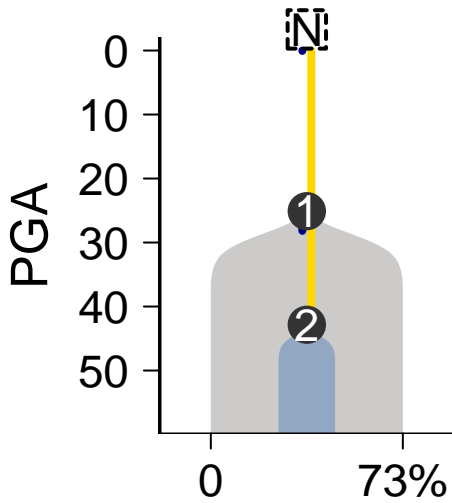

## MuTect-TITAN

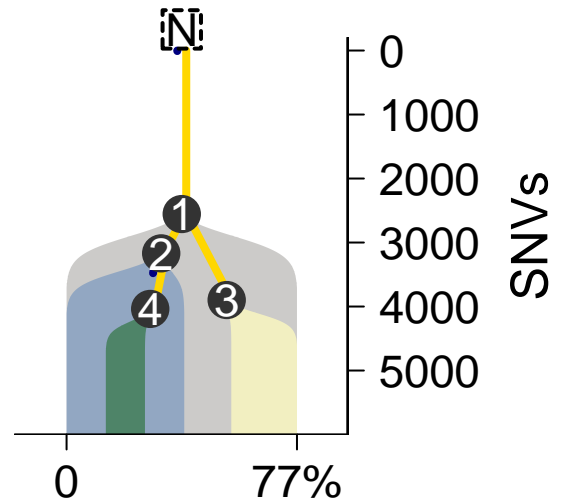

# Baca\_03-2345\_T\_wgs

## SomaticSniper-Battenberg

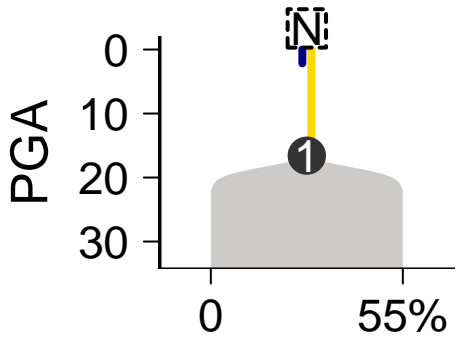

## SomaticSniper-TITAN

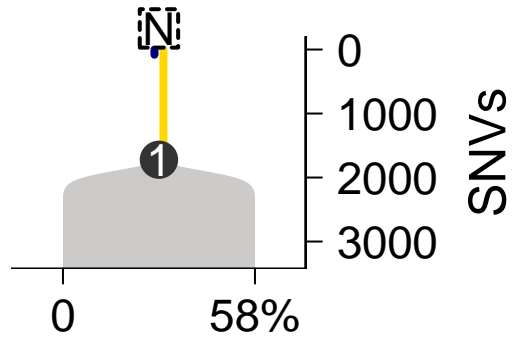

## MuTect-Battenberg

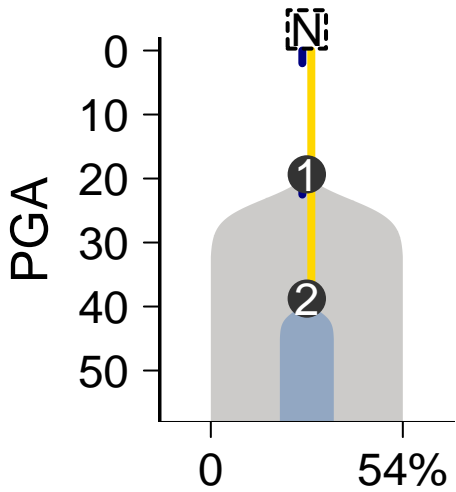

## MuTect-TITAN

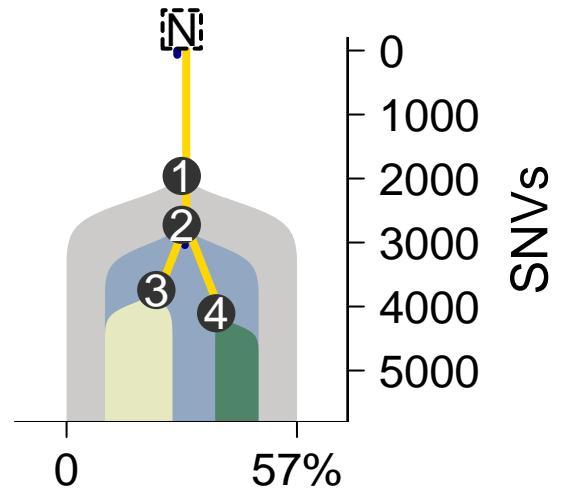

# Baca\_03-3125\_T\_wgs

## SomaticSniper-Battenberg

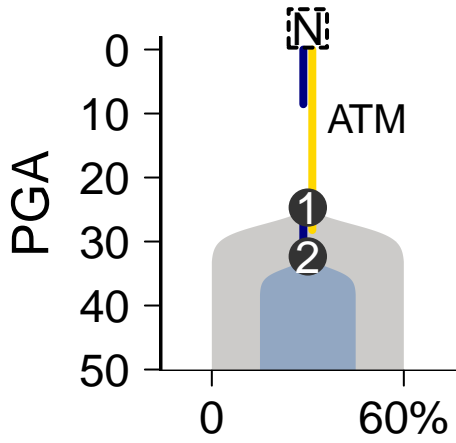

## SomaticSniper-TITAN

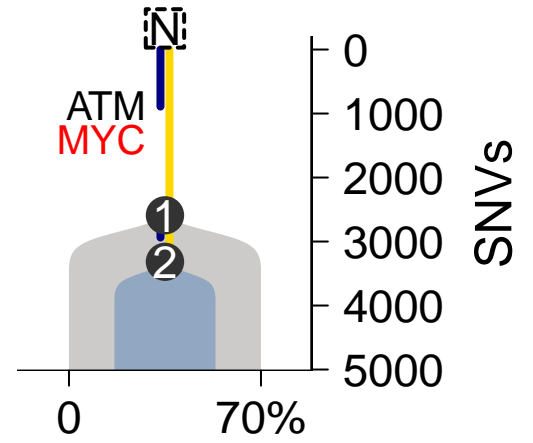

## MuTect-Battenberg

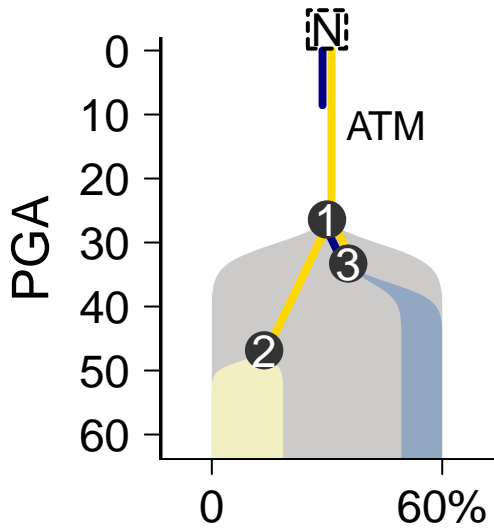

## MuTect-TITAN

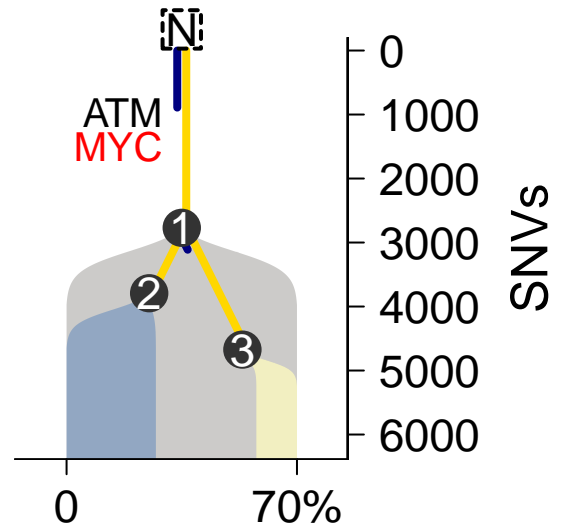

# Baca\_03-728\_T\_wgs

## SomaticSniper-Battenberg

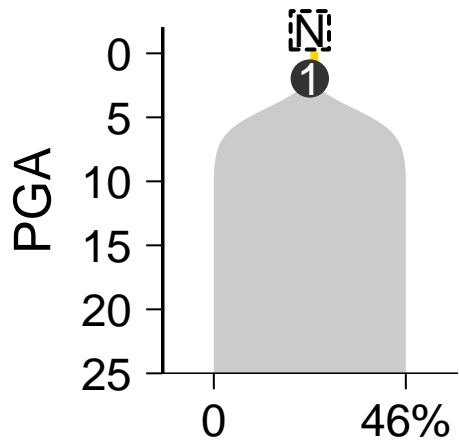

## SomaticSniper-TITAN

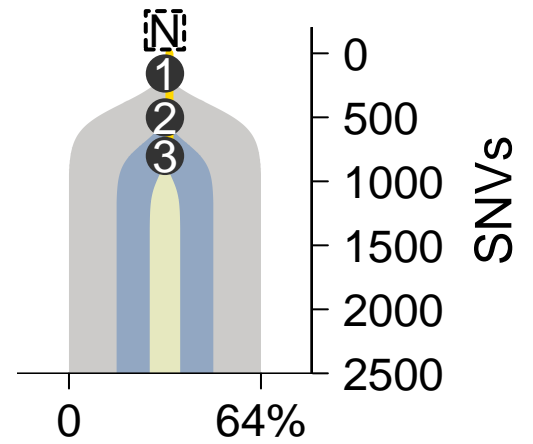

## MuTect-Battenberg

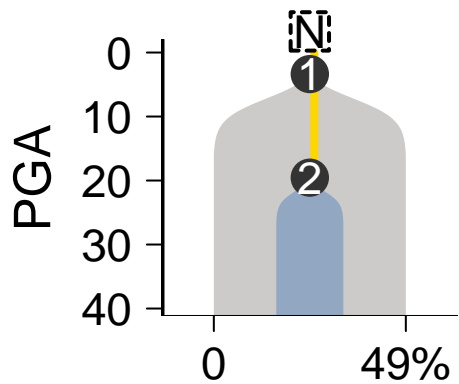

## MuTect-TITAN

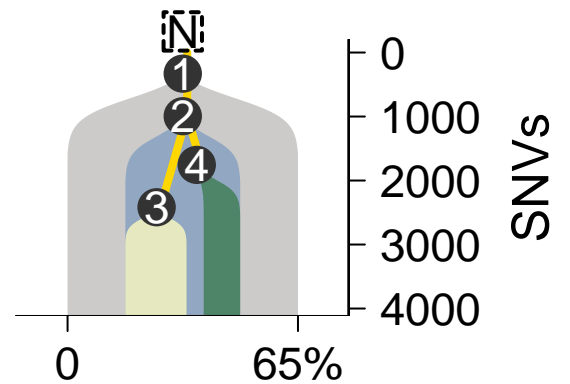

# Baca\_04-1084\_T\_wgs

## SomaticSniper-Battenberg

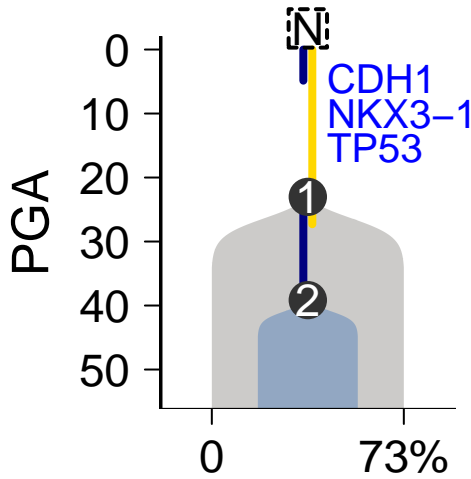

## SomaticSniper-TITAN

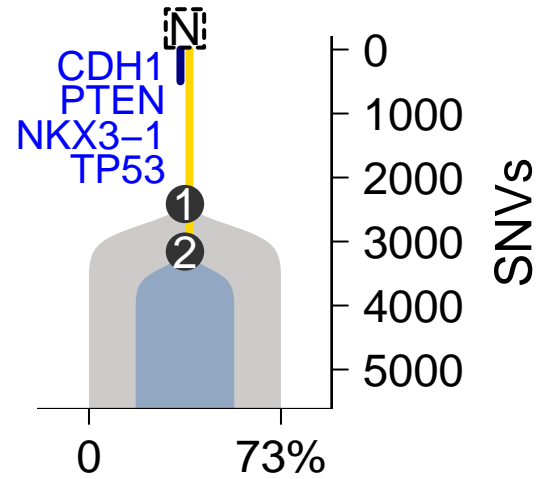

## MuTect-Battenberg

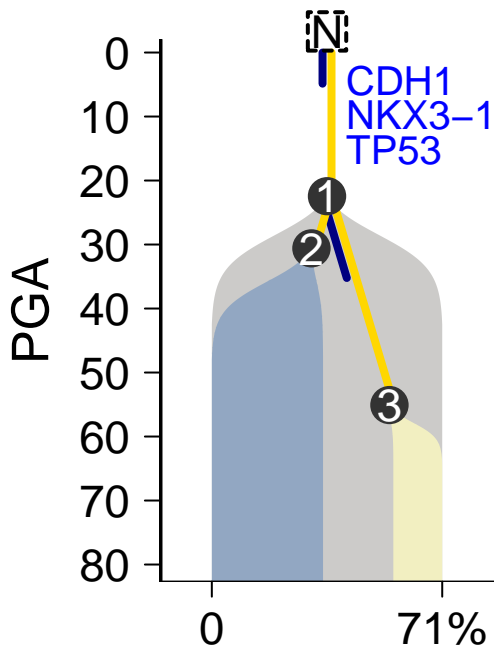

## MuTect-TITAN

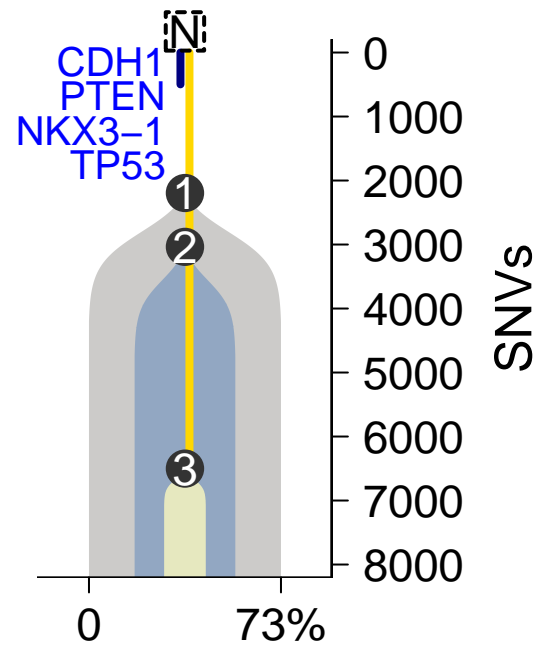

# Baca\_04-1243\_T\_wgs

## SomaticSniper-Battenberg

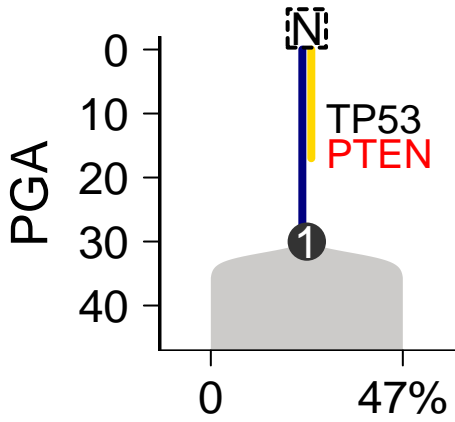

## SomaticSniper-TITAN

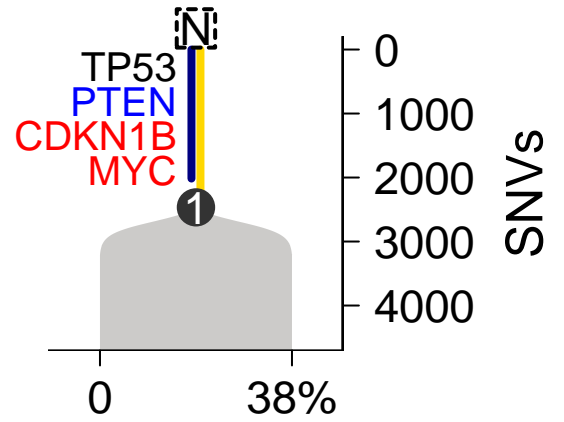

## MuTect-Battenberg

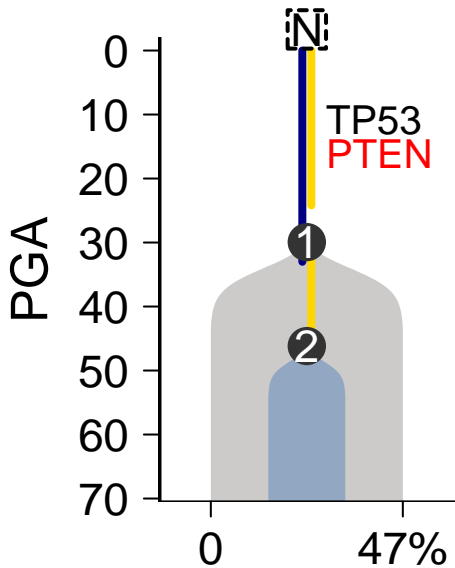

## MuTect-TITAN

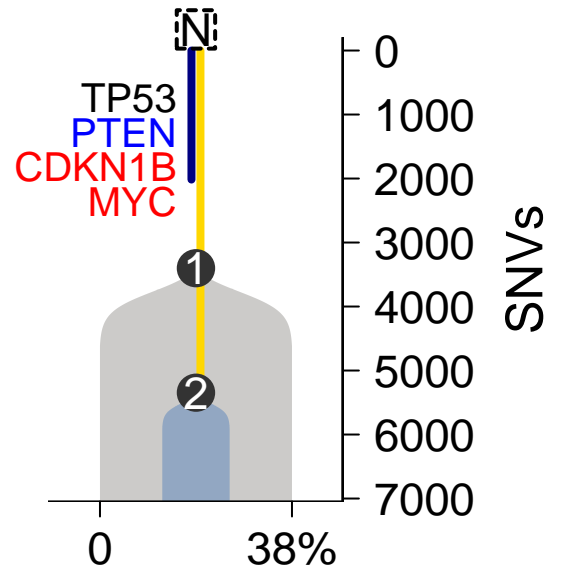



# Baca\_05-1657\_T\_wgs

## SomaticSniper-Battenberg

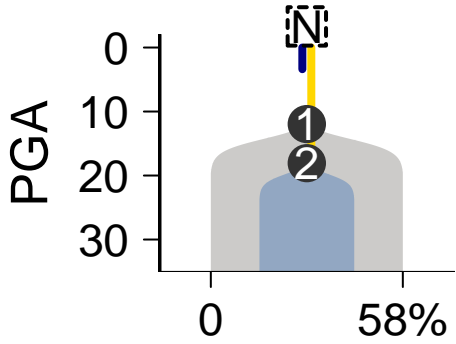

## SomaticSniper-TITAN

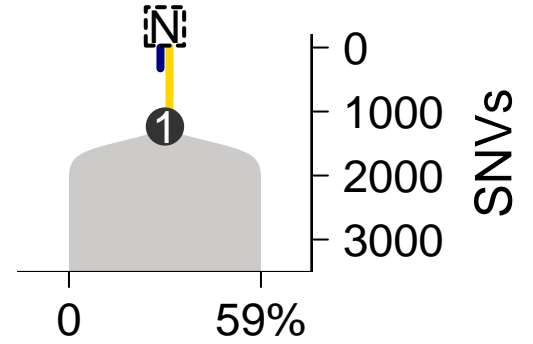

## MuTect-Battenberg

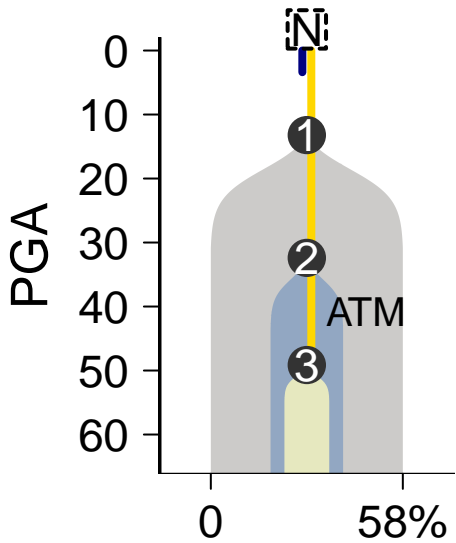

## MuTect-TITAN

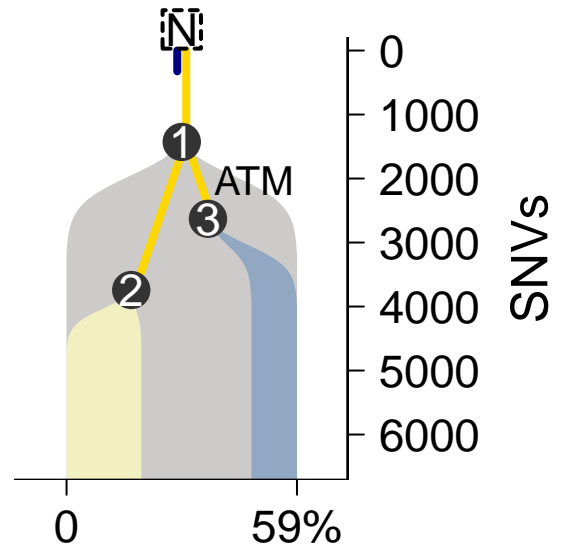

# Baca\_05-2709\_T\_wgs

## SomaticSniper-Battenberg

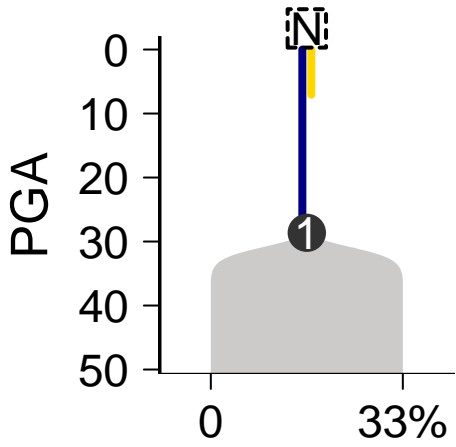

## SomaticSniper-TITAN

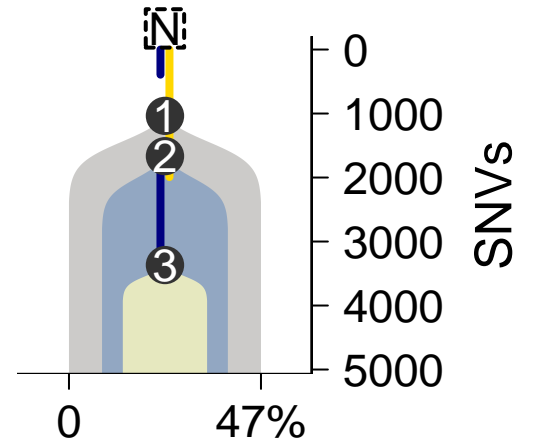

## MuTect-Battenberg

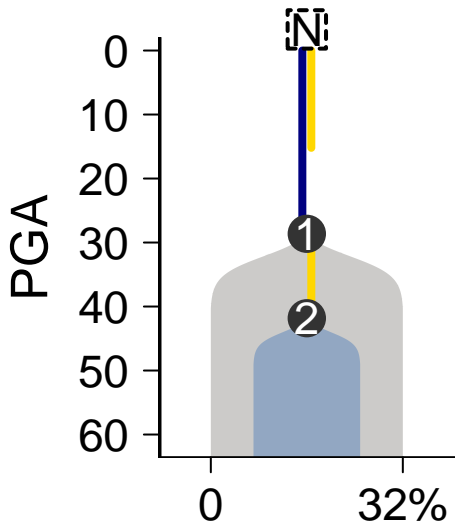

## MuTect-TITAN

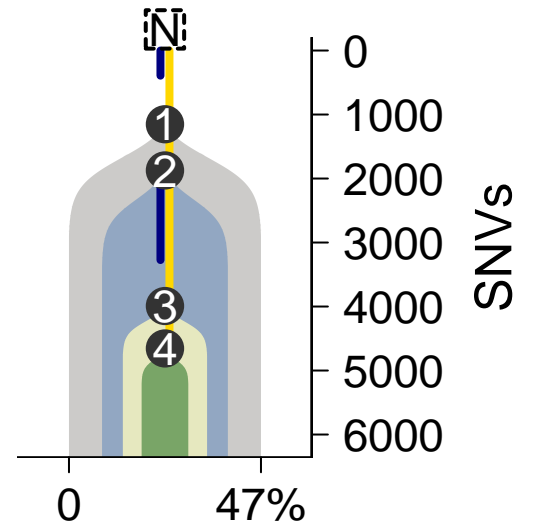

# Baca\_05-3595\_T\_wgs

## SomaticSniper-Battenberg

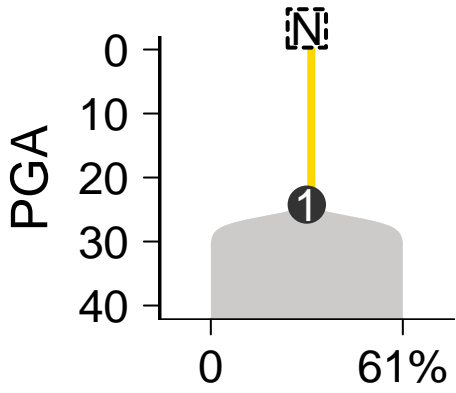

## SomaticSniper-TITAN

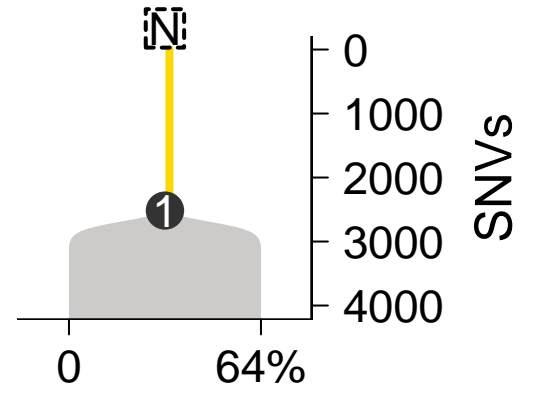

## MuTect-Battenberg

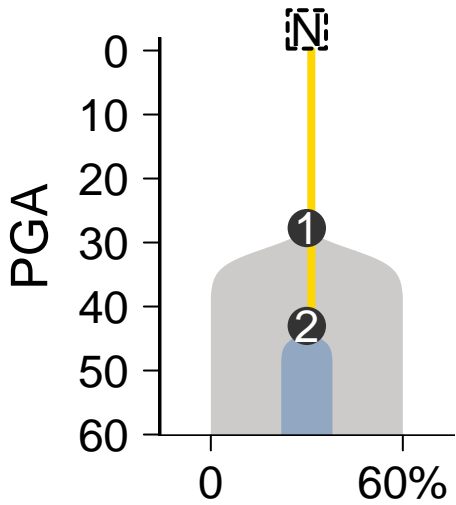

## MuTect-TITAN

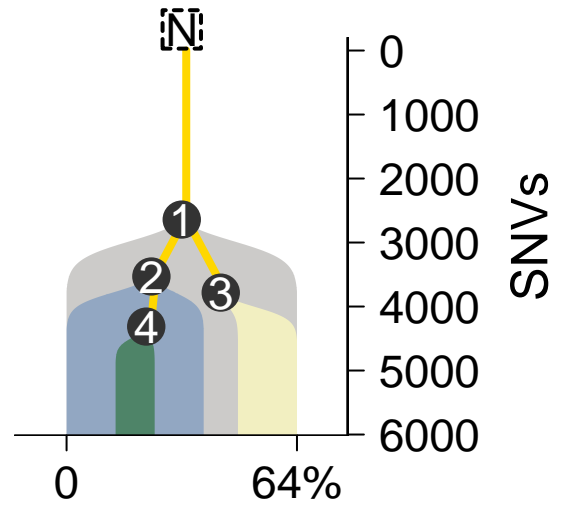

# Baca\_05-3852\_T\_wgs

## SomaticSniper-Battenberg

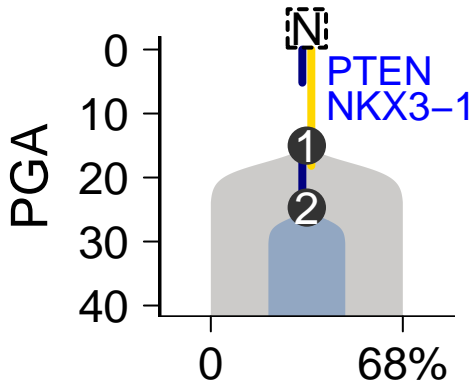

## SomaticSniper-TITAN

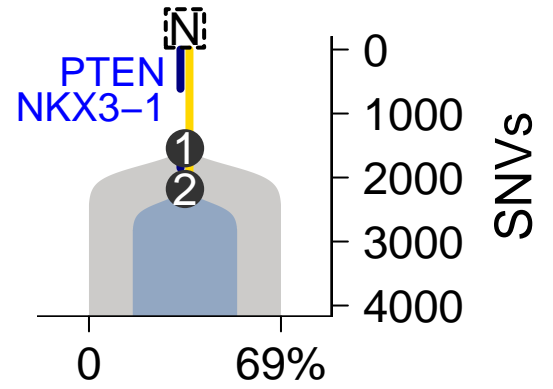

## MuTect-Battenberg

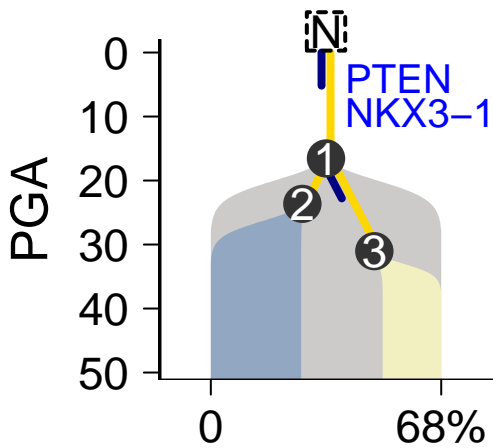

## MuTect-TITAN

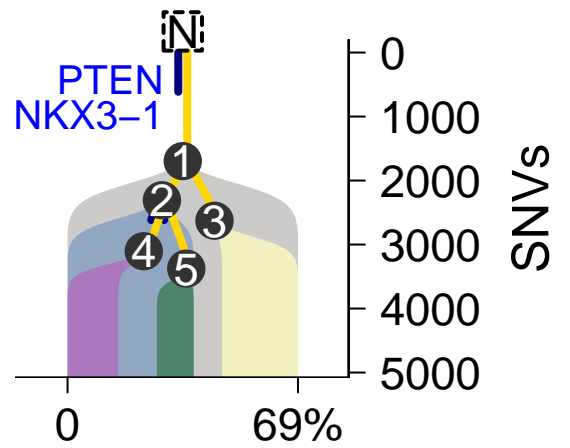

# Baca\_05-620\_T\_wgs

## SomaticSniper-Battenberg

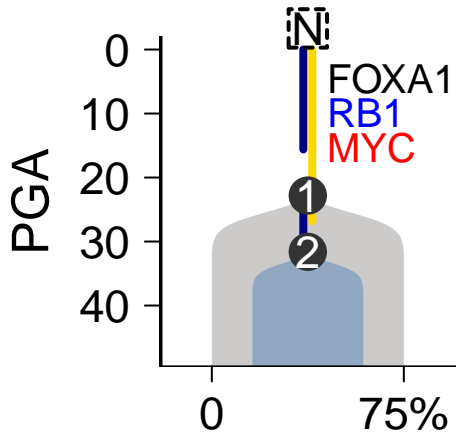

## SomaticSniper-TITAN

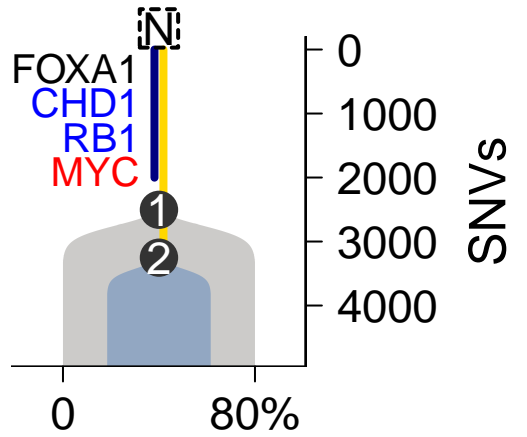

## MuTect-Battenberg

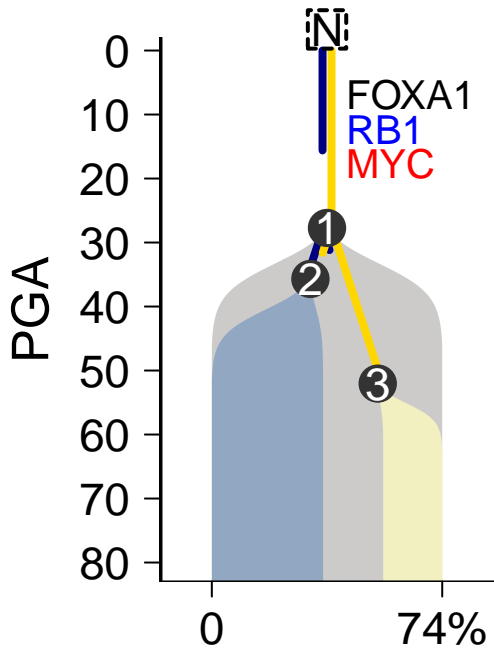

## MuTect-TITAN

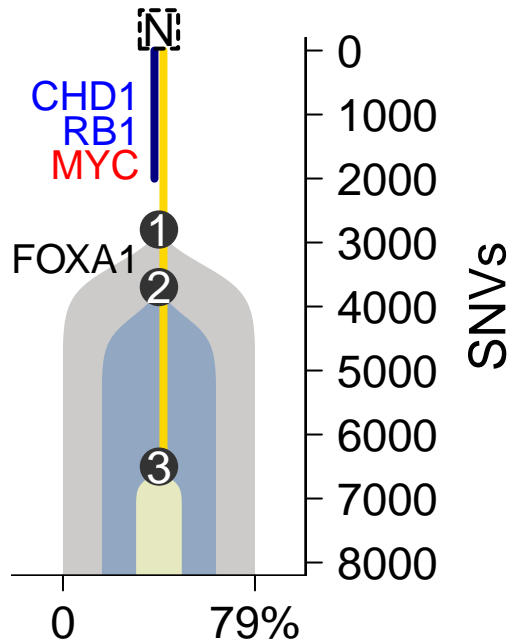

# Baca\_06-1749\_T\_wgs

## SomaticSniper-Battenberg

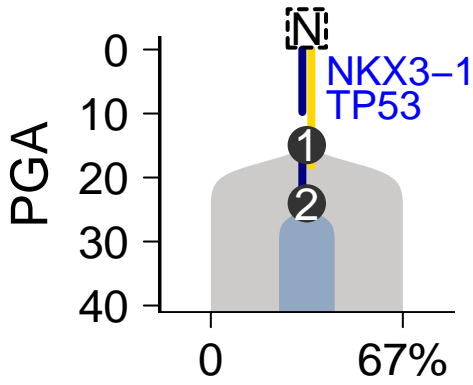

## SomaticSniper-TITAN

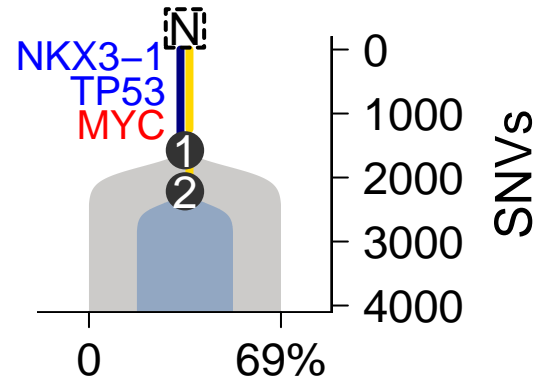

## MuTect-Battenberg

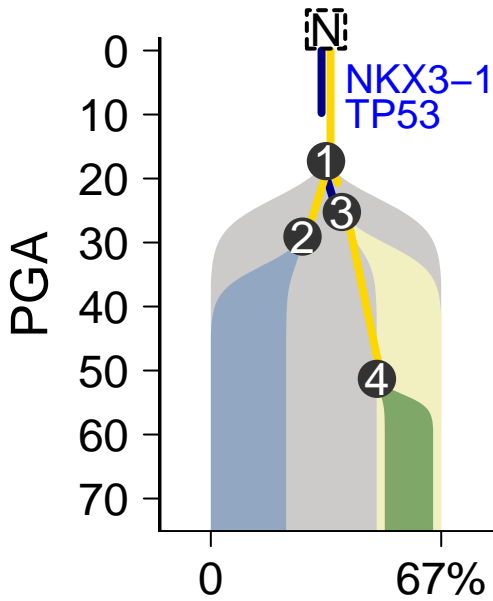

## MuTect-TITAN

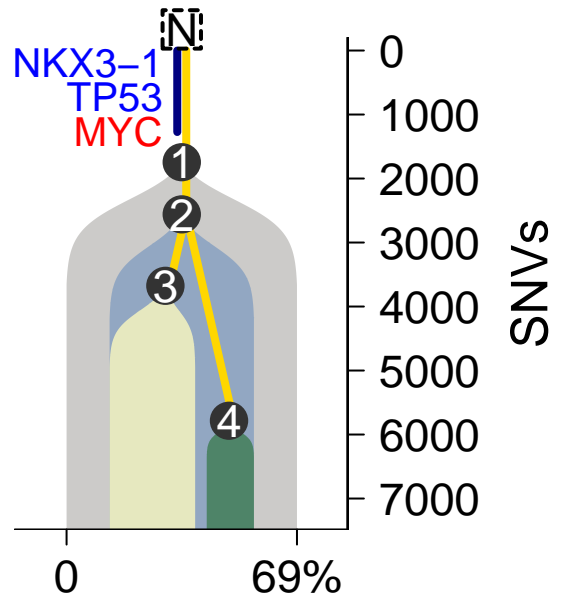

# Baca\_06-3199\_T\_wgs

## SomaticSniper-Battenberg

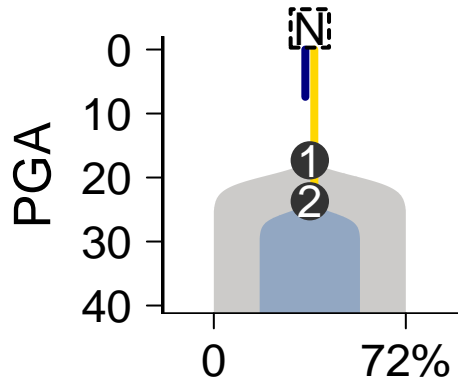

## SomaticSniper-TITAN

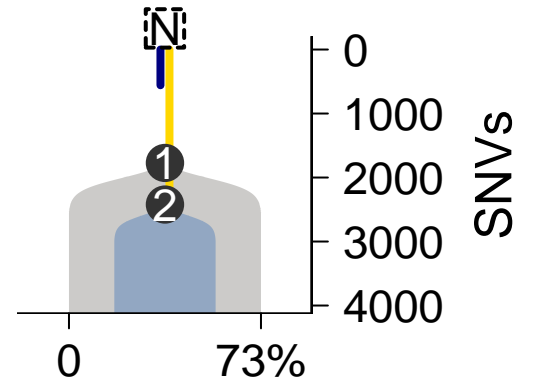

## MuTect-Battenberg

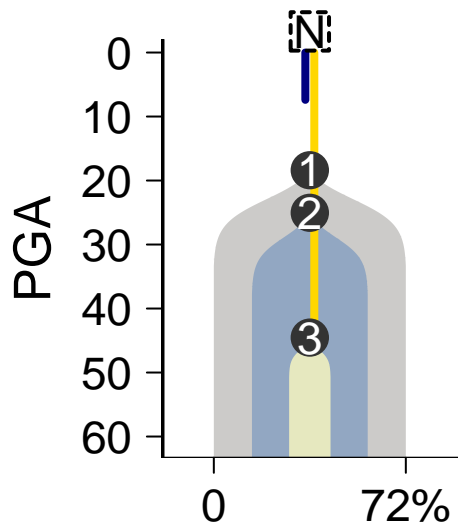

## MuTect-TITAN

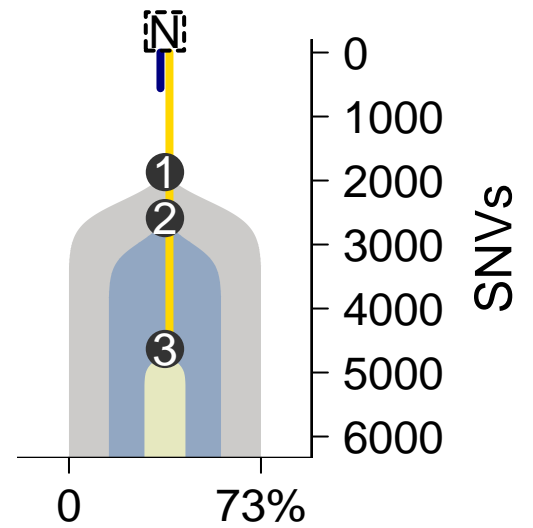

# Baca\_07-144\_T\_wgs

## SomaticSniper-Battenberg

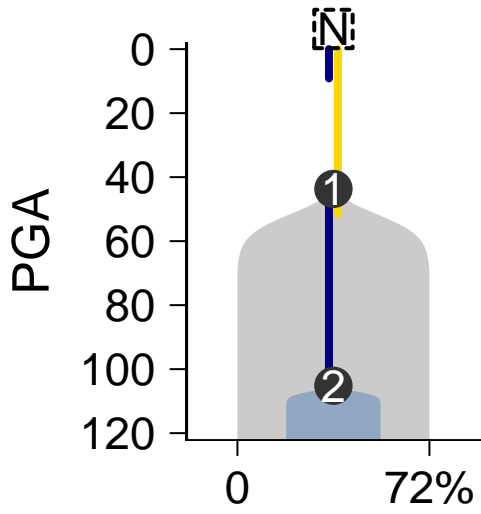

## SomaticSniper-TITAN

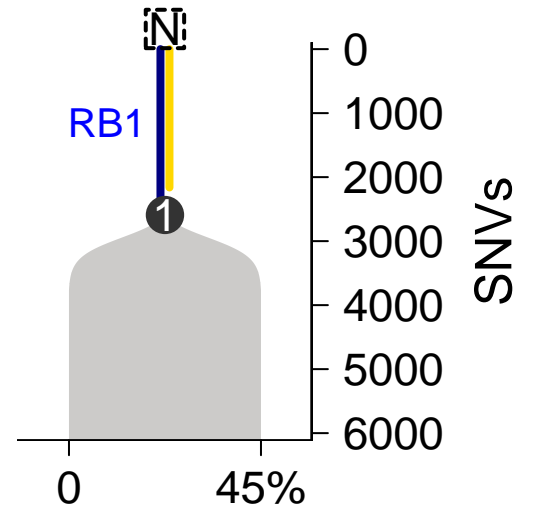

## MuTect-Battenberg

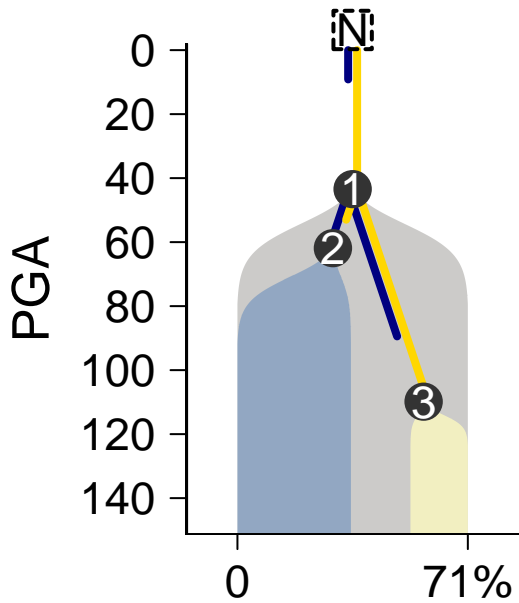

## MuTect-TITAN

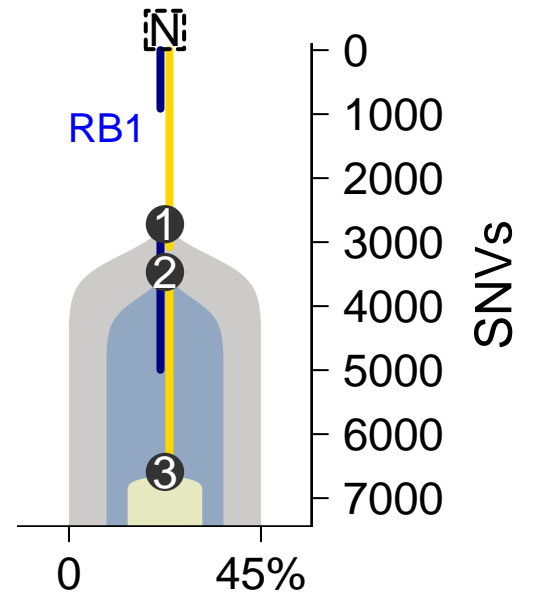



# Baca\_07-3258\_T\_wgs

## SomaticSniper-Battenberg

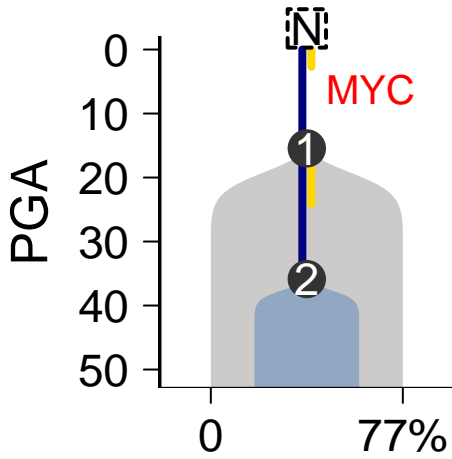

## SomaticSniper-TITAN

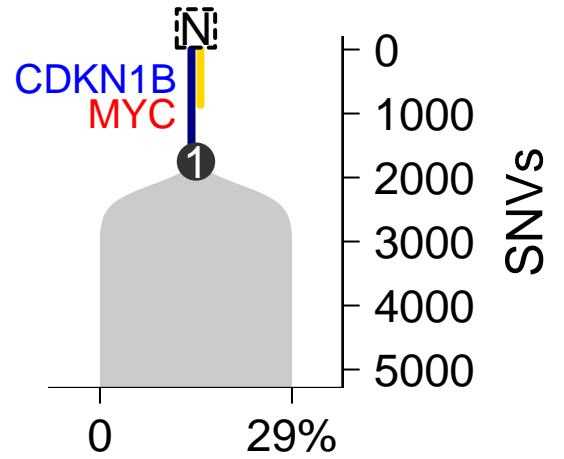

## MuTect-Battenberg

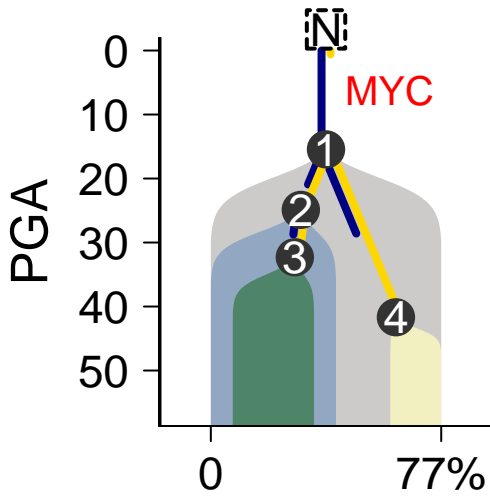

## MuTect-TITAN

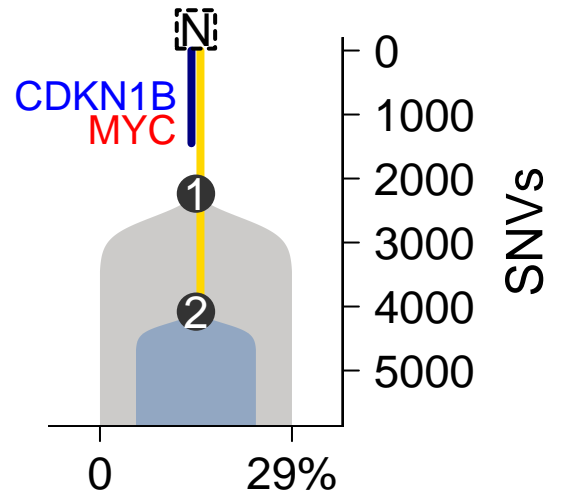

# Baca\_07-360\_T\_wgs

## SomaticSniper-Battenberg

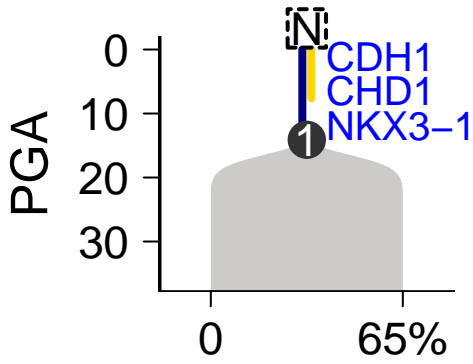

## SomaticSniper-TITAN

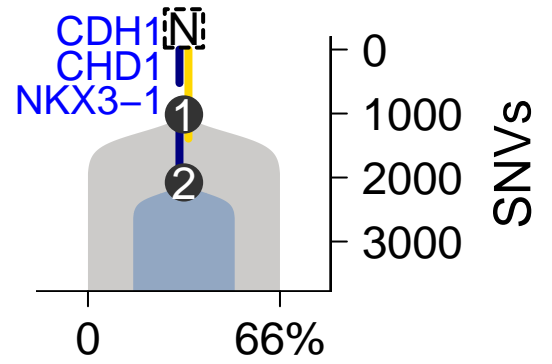

## MuTect-Battenberg

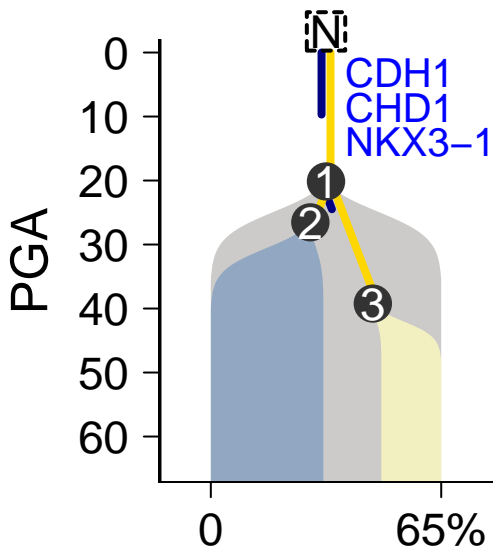

## MuTect-TITAN

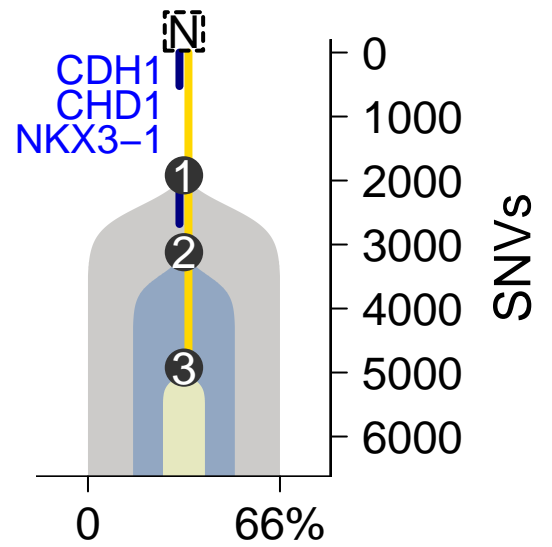

# Baca\_07-4610\_T\_wgs

## SomaticSniper-Battenberg

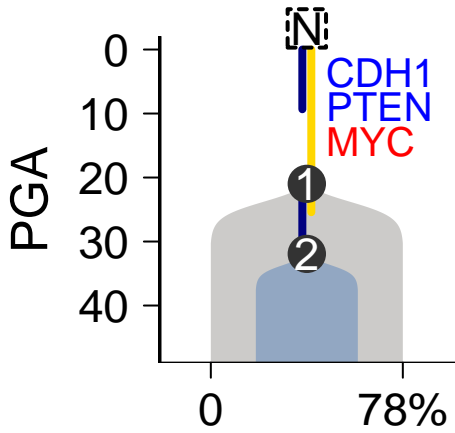

## SomaticSniper-TITAN

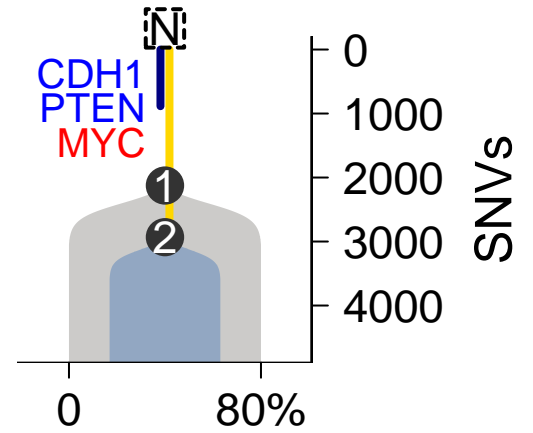

## MuTect-Battenberg

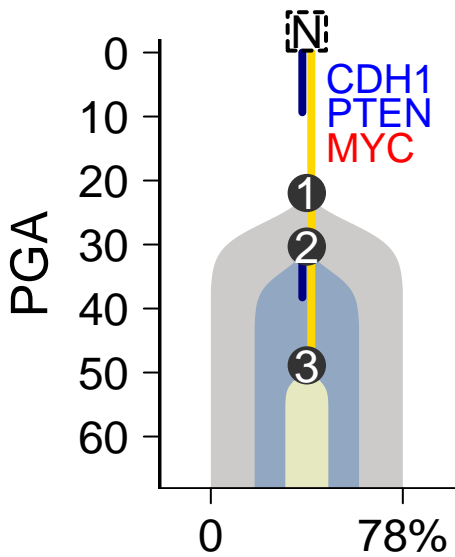

## MuTect-TITAN

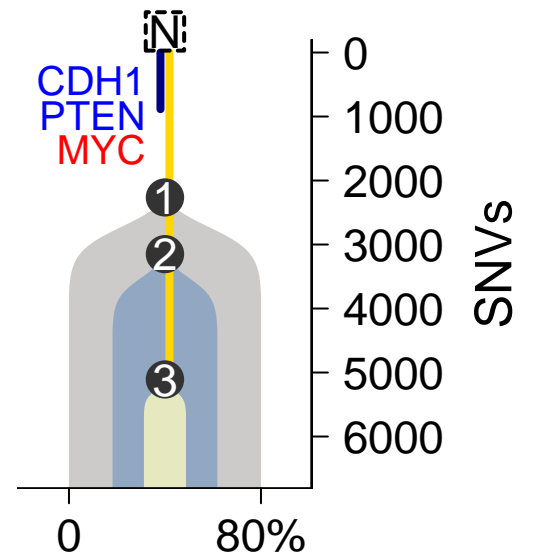

# Baca\_07-4814\_T\_wgs

## SomaticSniper-Battenberg

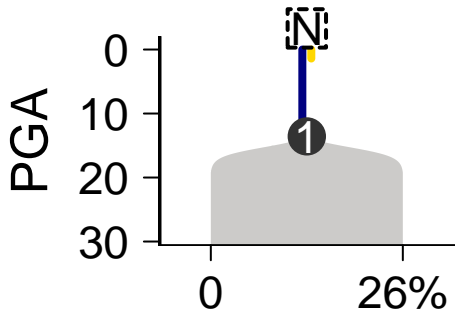

## SomaticSniper-TITAN

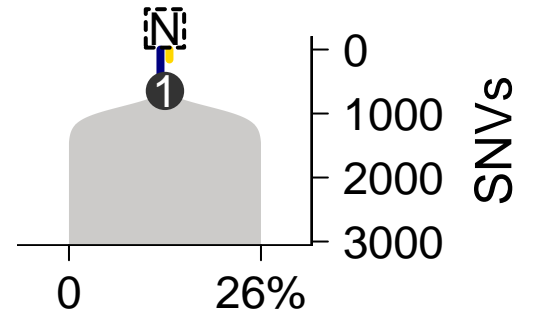

## MuTect-Battenberg

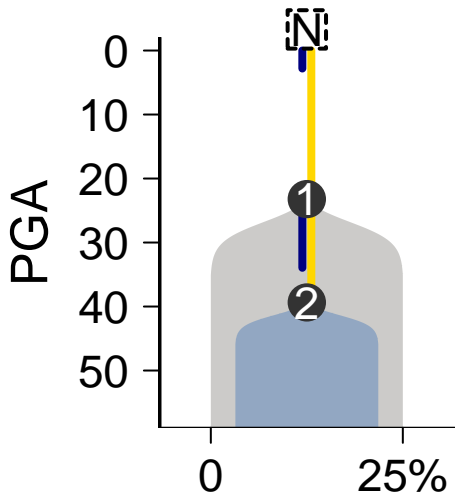

## MuTect-TITAN

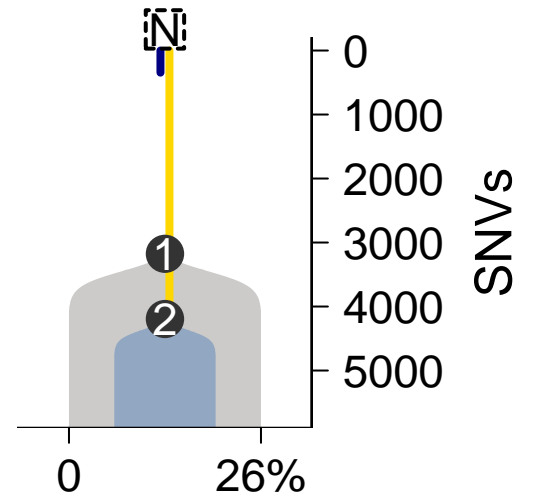

# Baca\_07-4941\_T\_wgs

## SomaticSniper-Battenberg

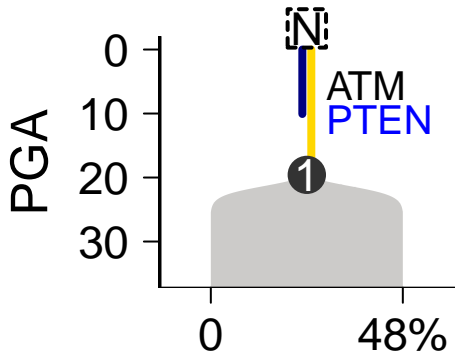

## SomaticSniper-TITAN

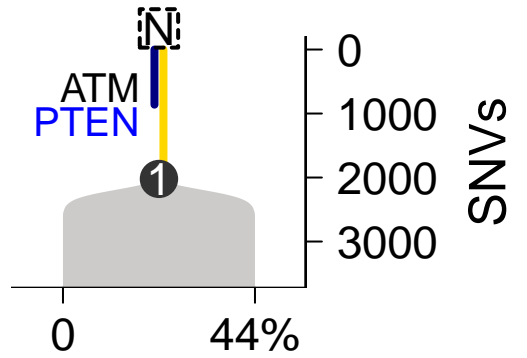

## MuTect-Battenberg

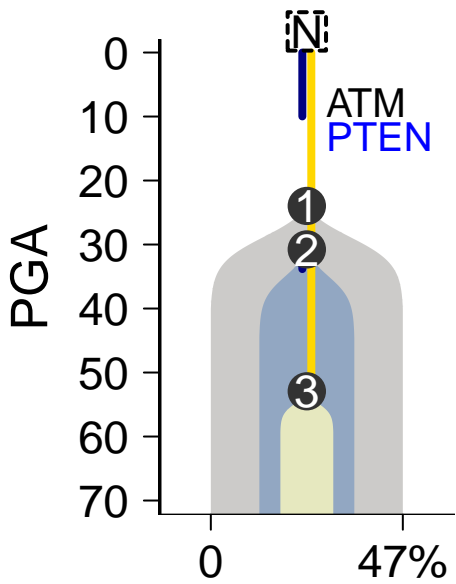

## MuTect-TITAN

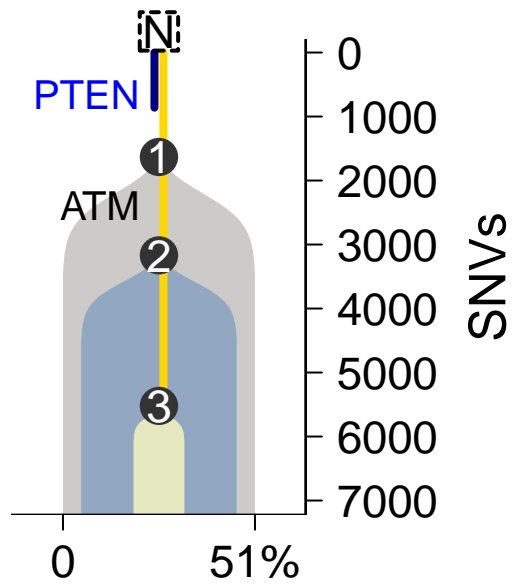

# Baca\_07-5021\_T\_wgs

## SomaticSniper-Battenberg

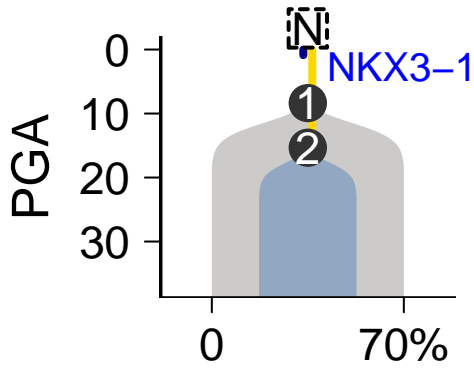

## SomaticSniper-TITAN

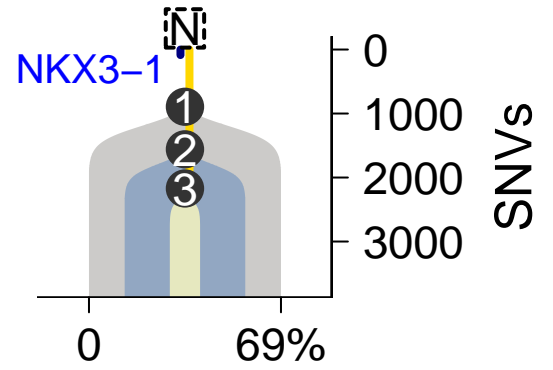

## MuTect-Battenberg

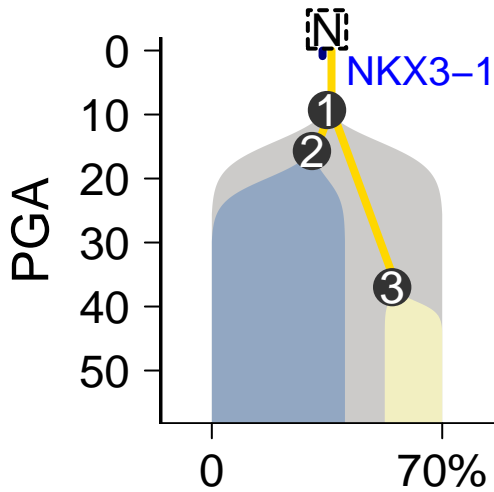

## MuTect-TITAN

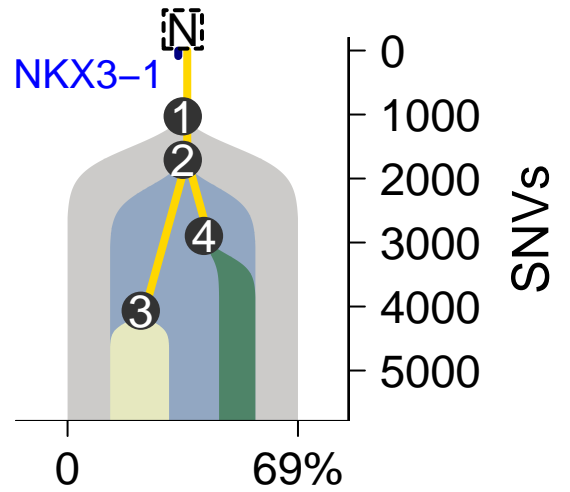

# Baca\_07-5037\_T\_wgs

## SomaticSniper-Battenberg

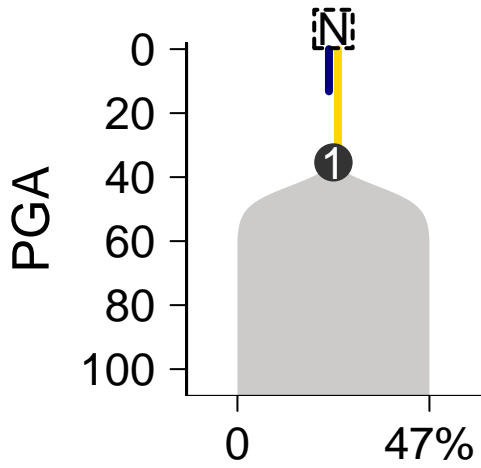

## SomaticSniper-TITAN

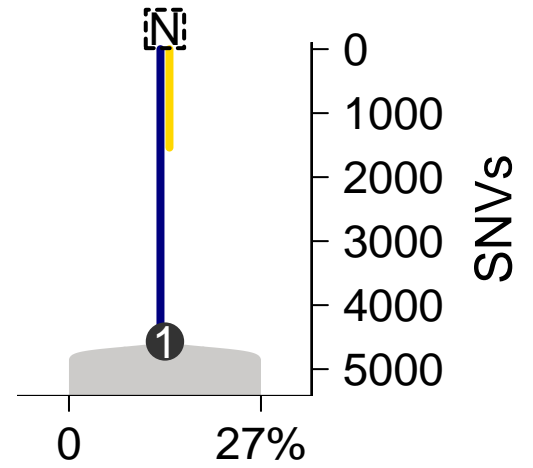

## MuTect-Battenberg

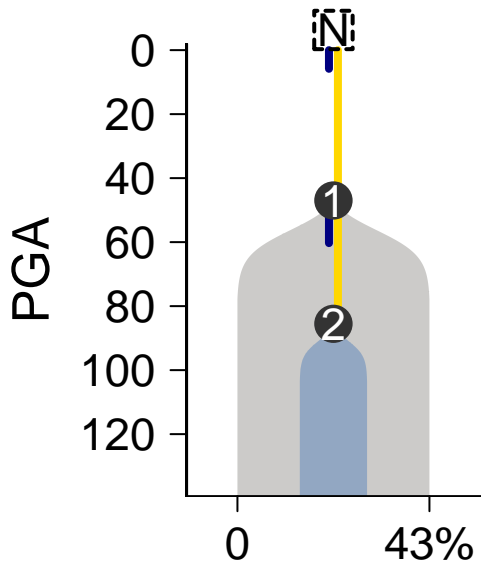

## MuTect-TITAN

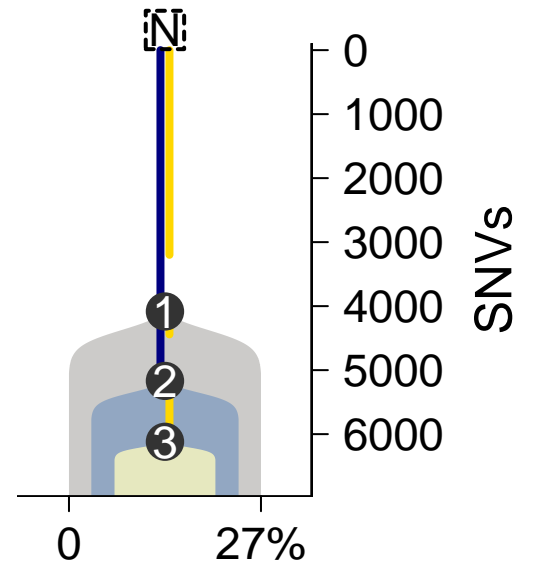

# Baca\_07-5318\_T\_wgs

## SomaticSniper-Battenberg

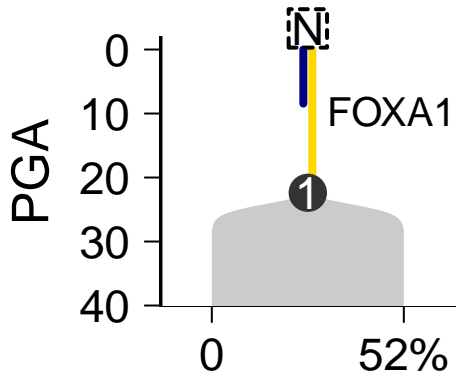

## SomaticSniper-TITAN

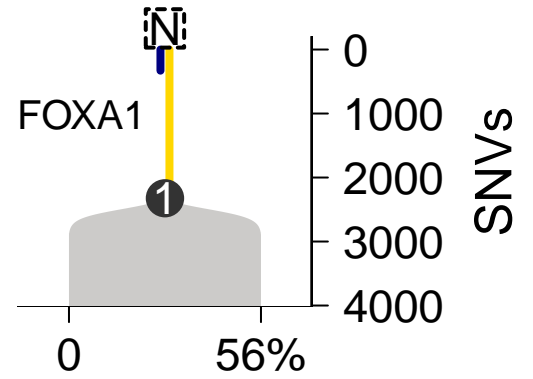

## MuTect-Battenberg

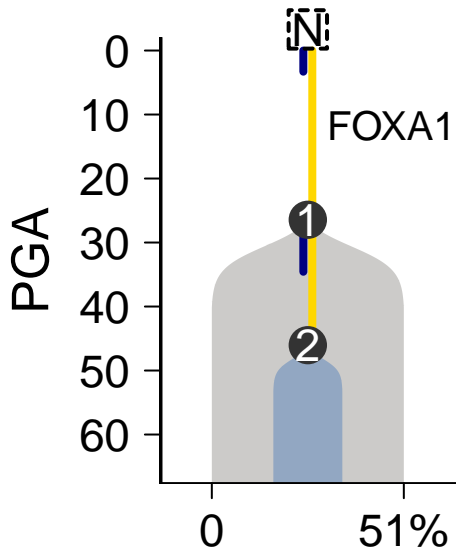

## MuTect-TITAN

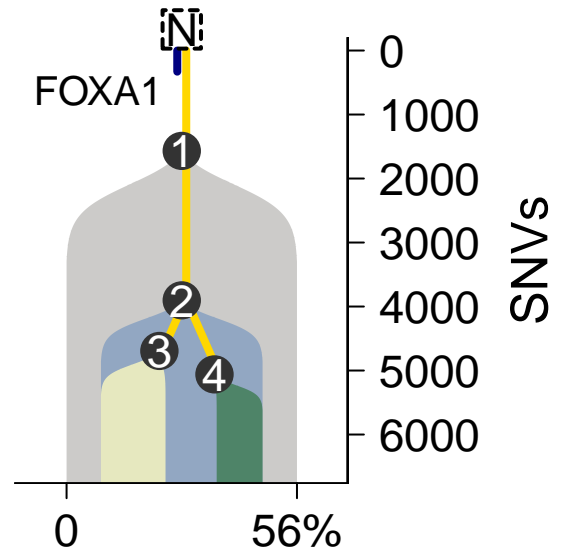



# Baca\_07-837\_T\_wgs

## SomaticSniper-Battenberg

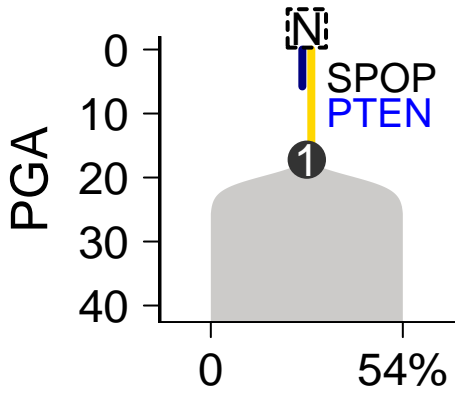

## SomaticSniper-TITAN

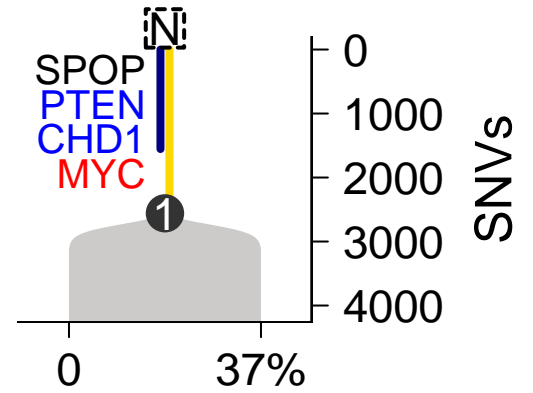

## MuTect-Battenberg

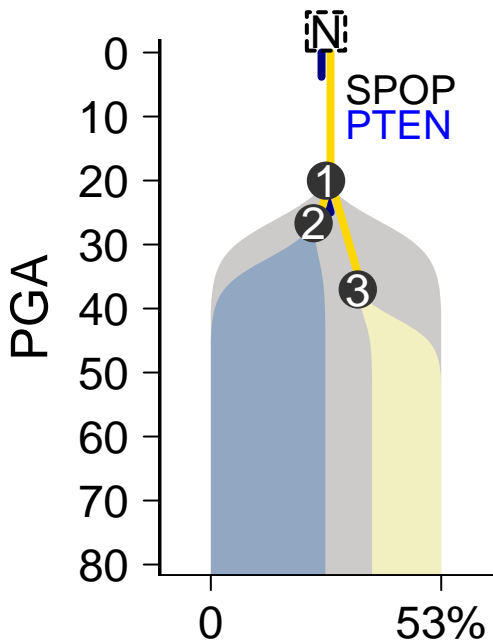

## MuTect-TITAN

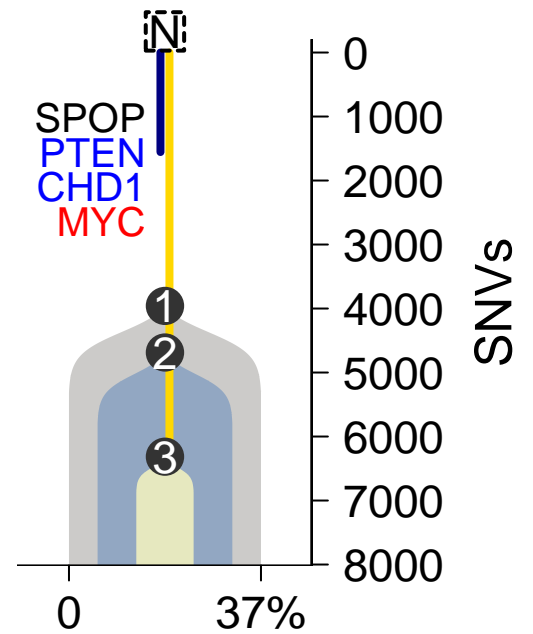

# Baca\_08-1042\_T\_wgs

## SomaticSniper-Battenberg

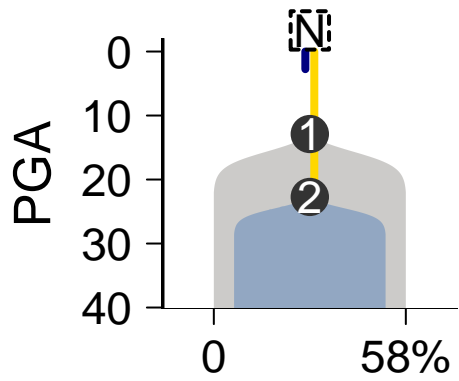

## SomaticSniper-TITAN

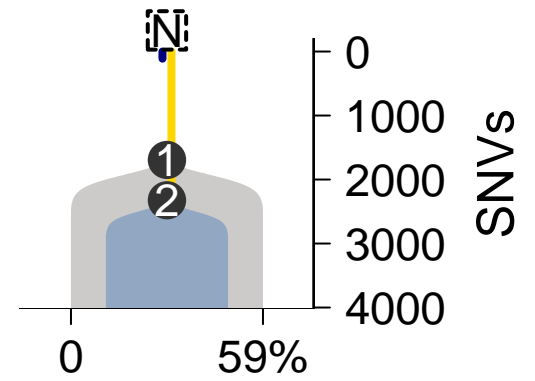

## MuTect-Battenberg

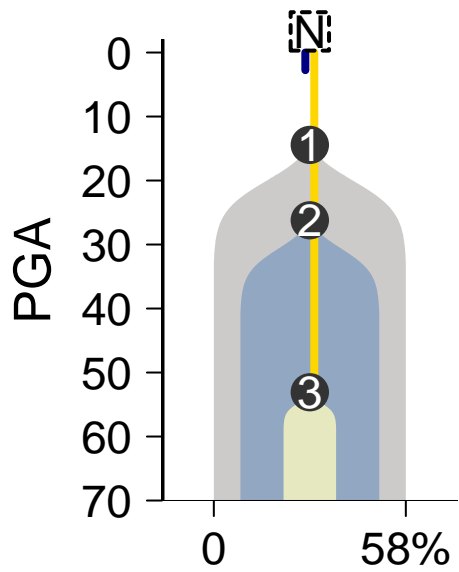

## MuTect-TITAN

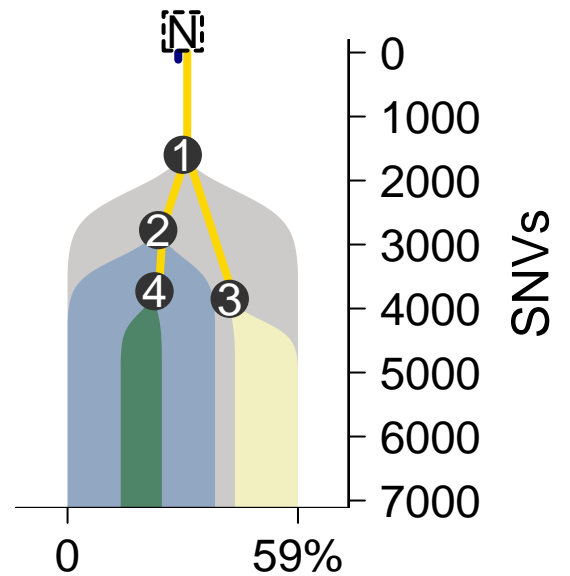

# Baca\_08-1541\_T\_wgs

## SomaticSniper-Battenberg

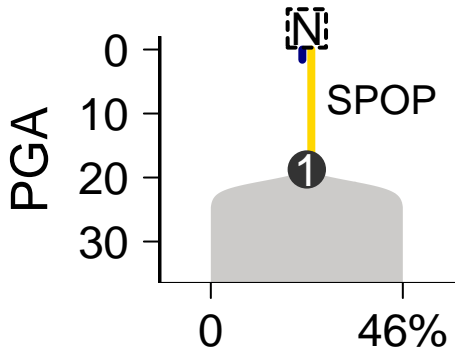

## SomaticSniper-TITAN

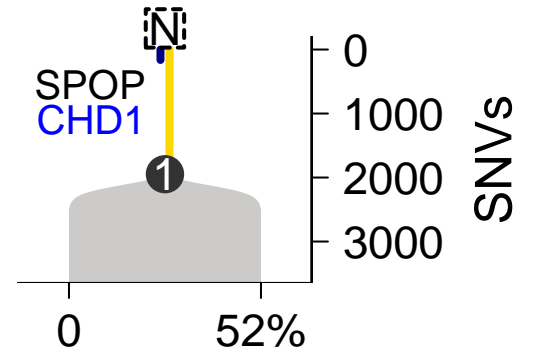

## MuTect-Battenberg

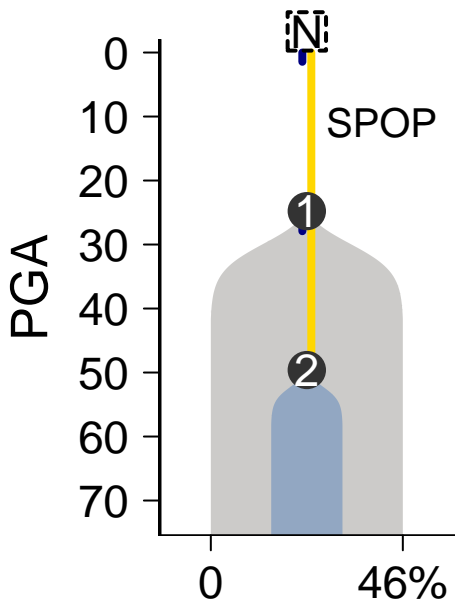

## MuTect-TITAN

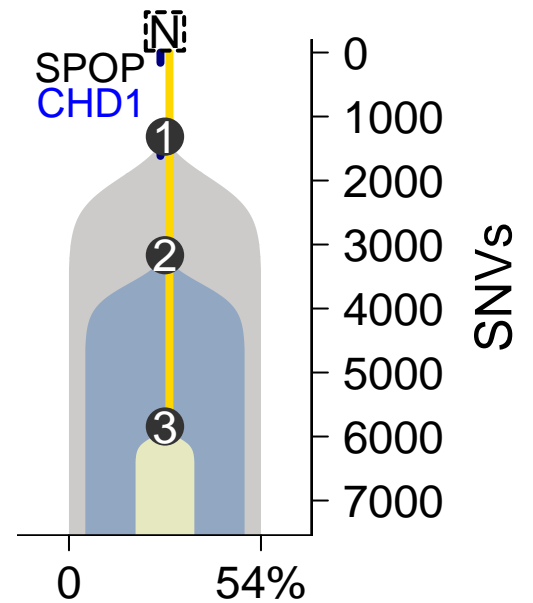

# Baca\_08-2153\_T\_wgs

## SomaticSniper-Battenberg

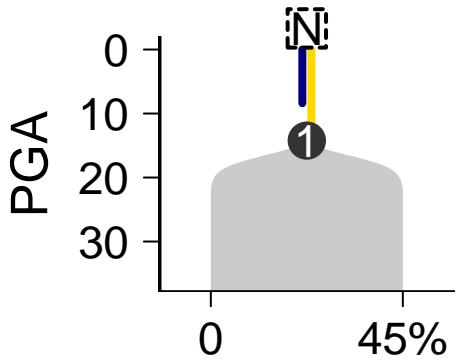

## SomaticSniper-TITAN

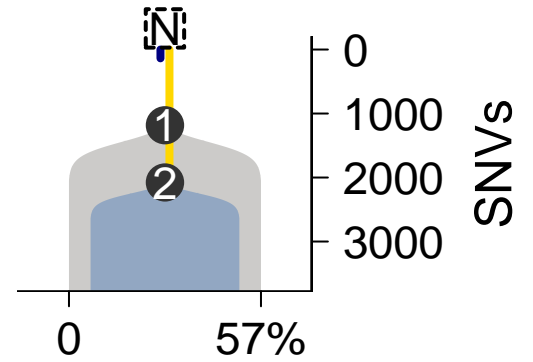

## MuTect-Battenberg

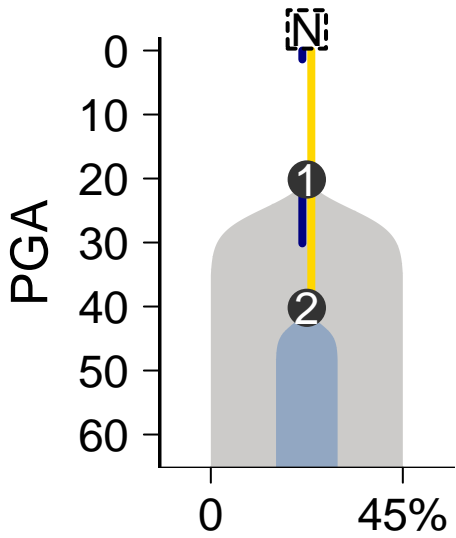

## MuTect-TITAN

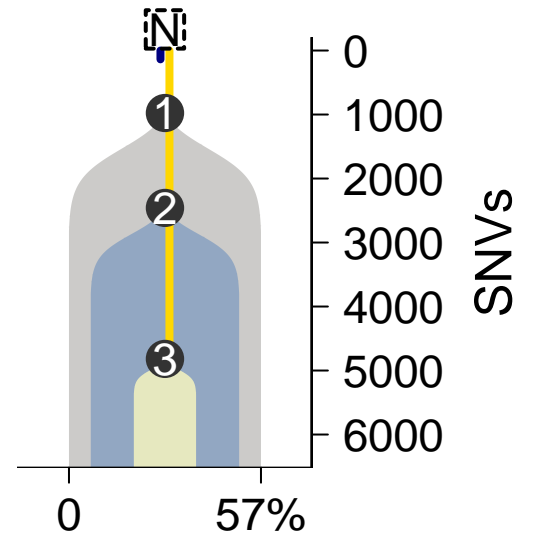

# Baca\_08-217\_T\_wgs

## SomaticSniper-Battenberg

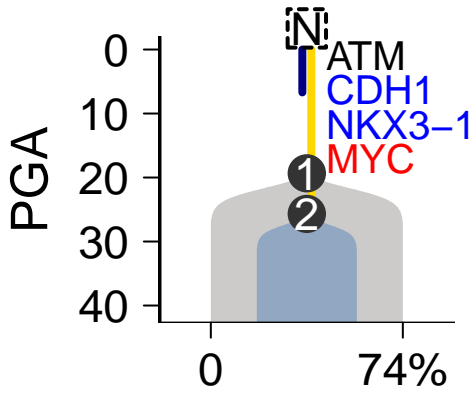

## SomaticSniper-TITAN

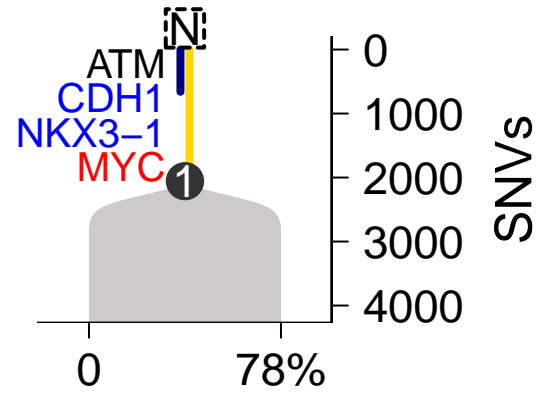

## MuTect-Battenberg

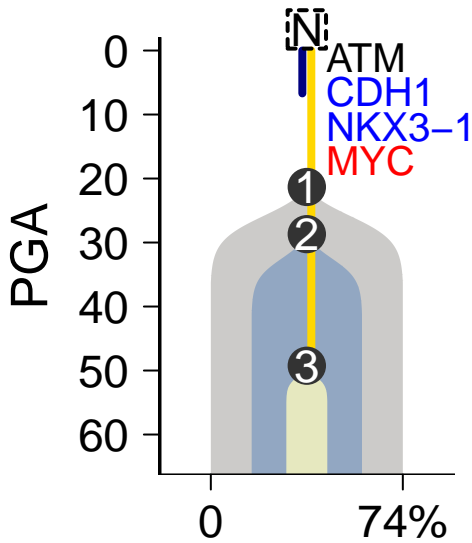

## MuTect-TITAN

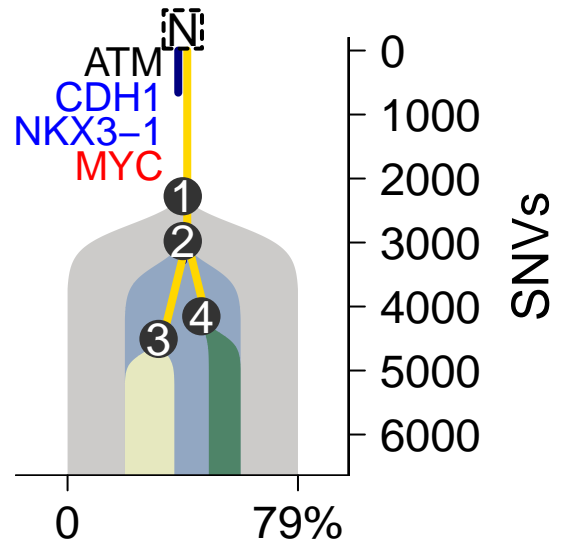

# Baca\_08-2455\_T\_wgs

## SomaticSniper-Battenberg

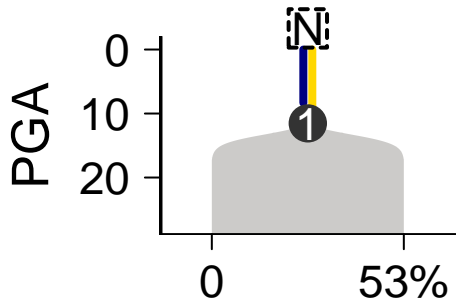

## SomaticSniper-TITAN

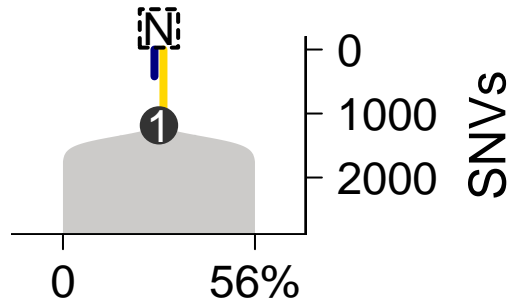

## MuTect-Battenberg

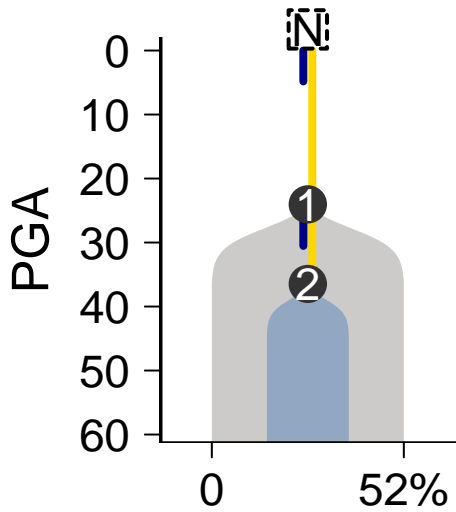

## MuTect-TITAN

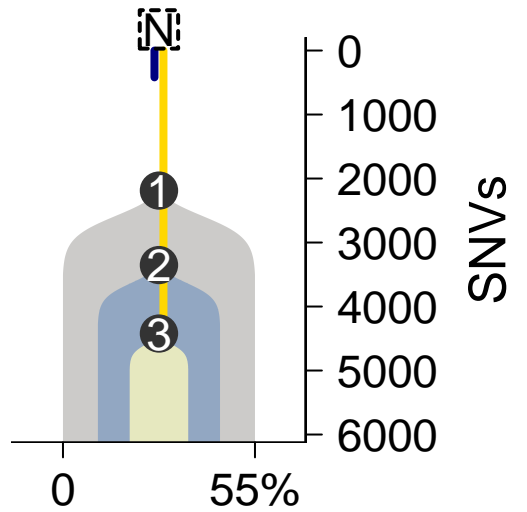

# Baca\_08-4154\_T\_wgs

## SomaticSniper-Battenberg

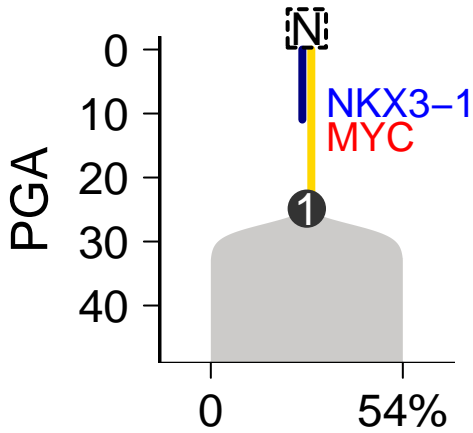

## SomaticSniper-TITAN

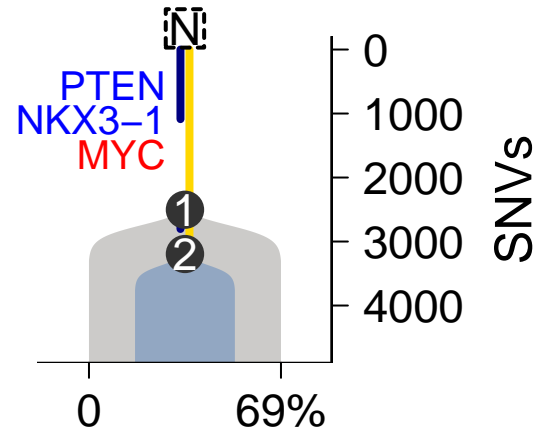

## MuTect-Battenberg

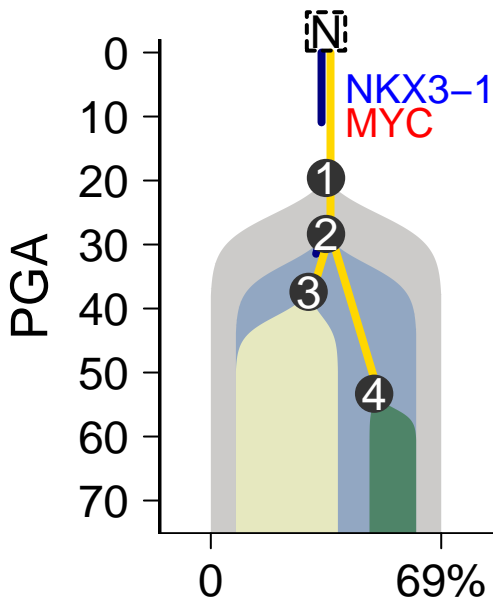

## MuTect-TITAN

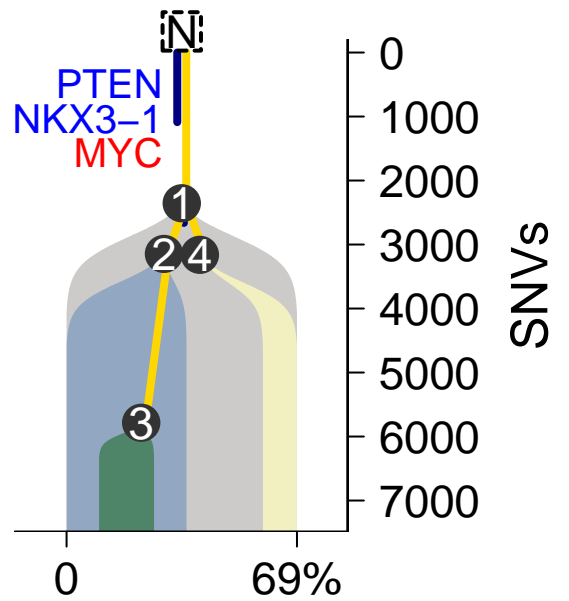

# Baca\_08-492\_T\_wgs

## SomaticSniper-Battenberg

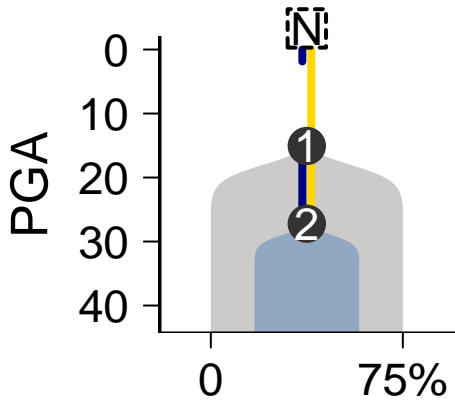

## SomaticSniper-TITAN

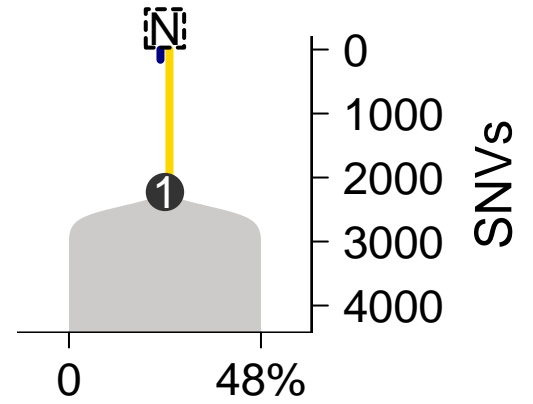

## MuTect-Battenberg

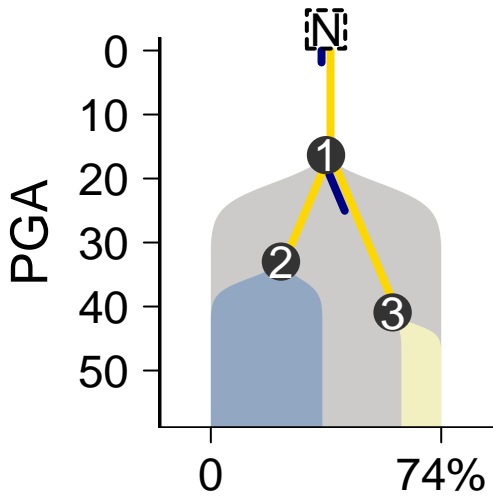

## MuTect-TITAN

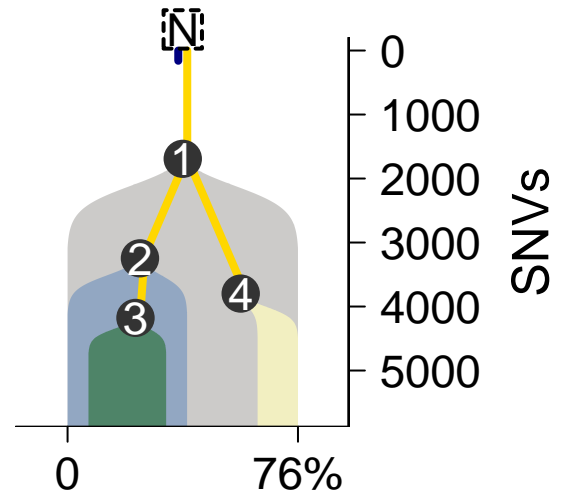



# Baca\_08-501\_T\_wgs

## SomaticSniper-Battenberg

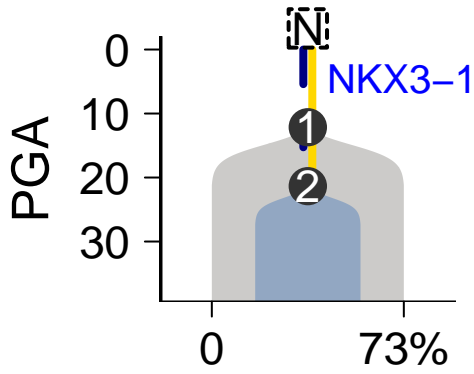

## SomaticSniper-TITAN

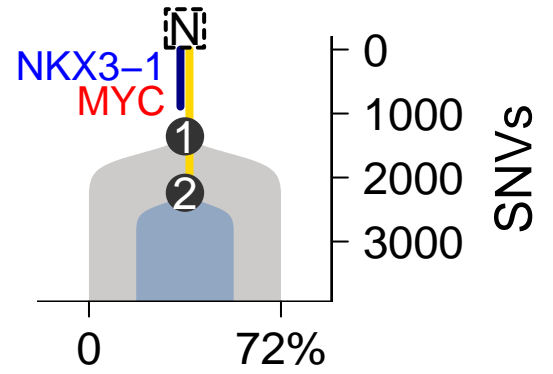

## MuTect-Battenberg

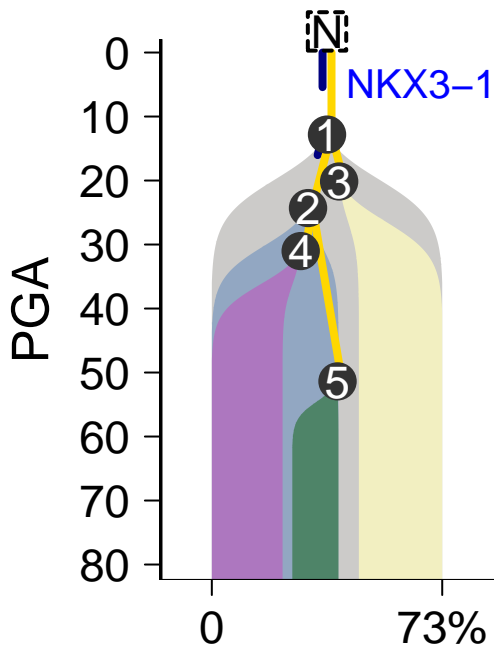

## MuTect-TITAN

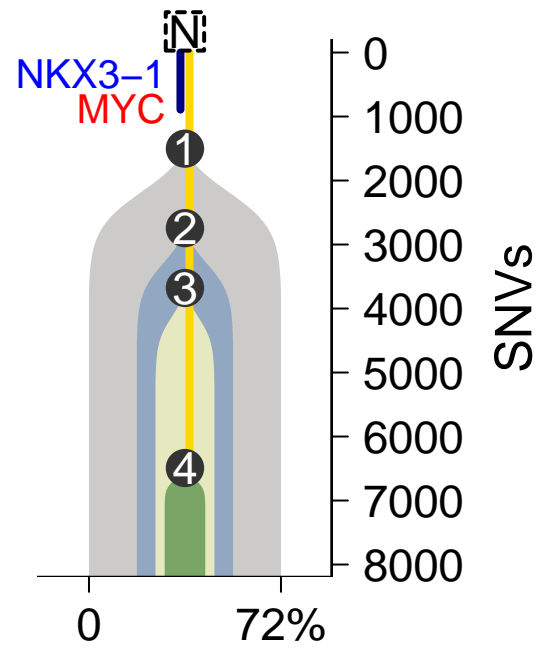

# Baca\_08-556\_T\_wgs

## SomaticSniper-Battenberg

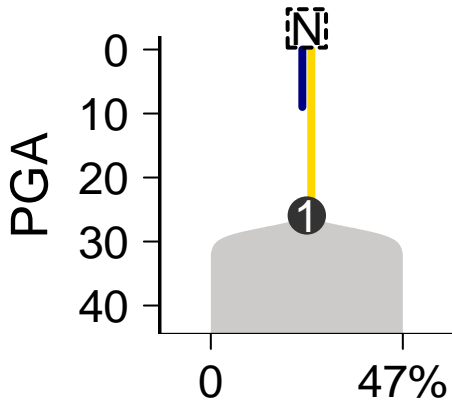

## SomaticSniper-TITAN

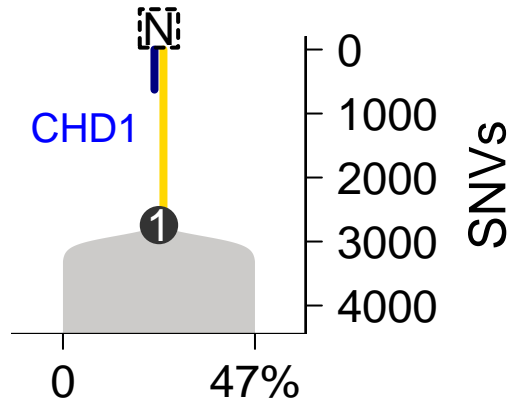

## MuTect-Battenberg

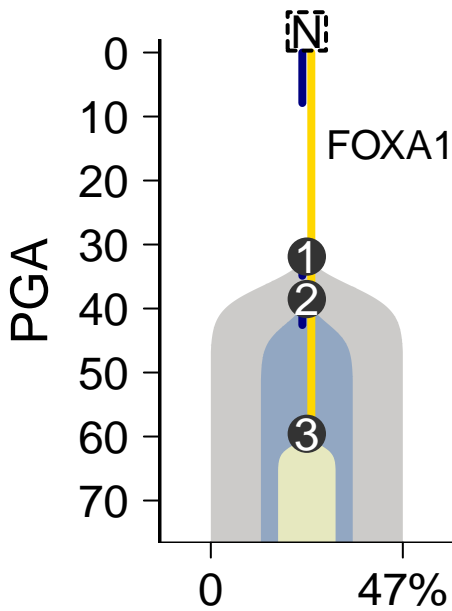

## MuTect-TITAN

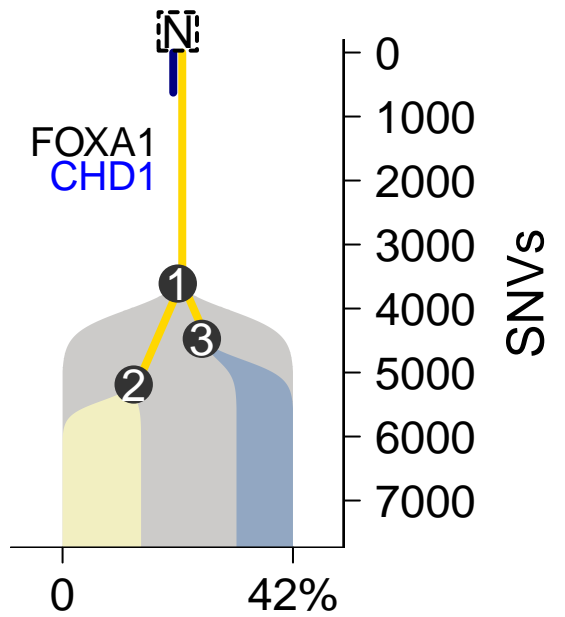

# Baca\_08-5852\_T\_wgs

## SomaticSniper-Battenberg

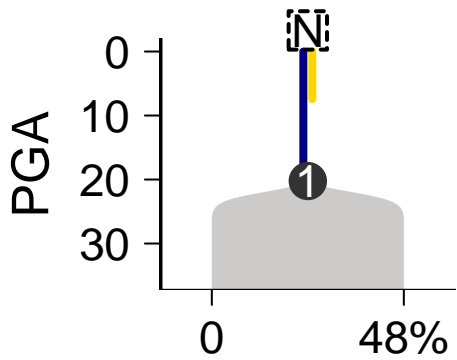

## SomaticSniper-TITAN

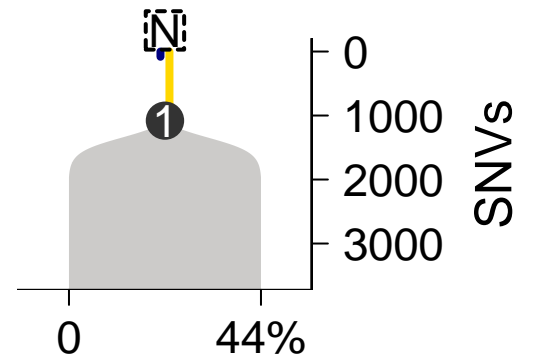

## MuTect-Battenberg

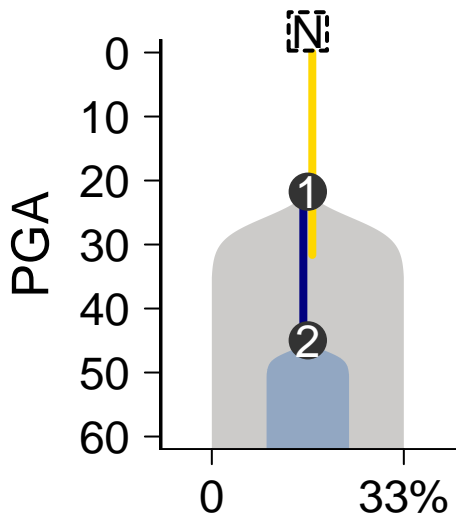

## MuTect-TITAN

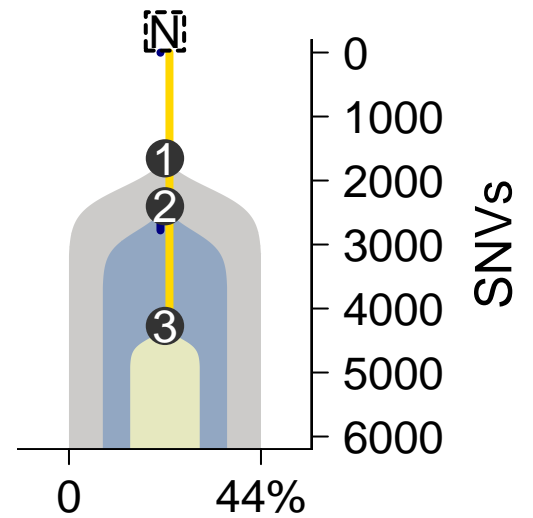

# Baca\_08-716\_T\_wgs

## SomaticSniper-Battenberg

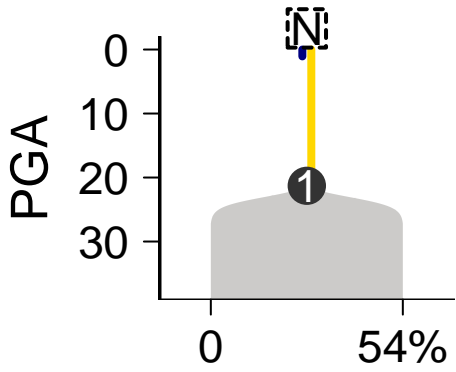

## SomaticSniper-TITAN

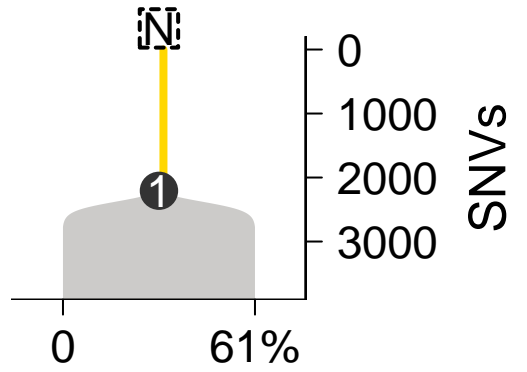

## MuTect-Battenberg

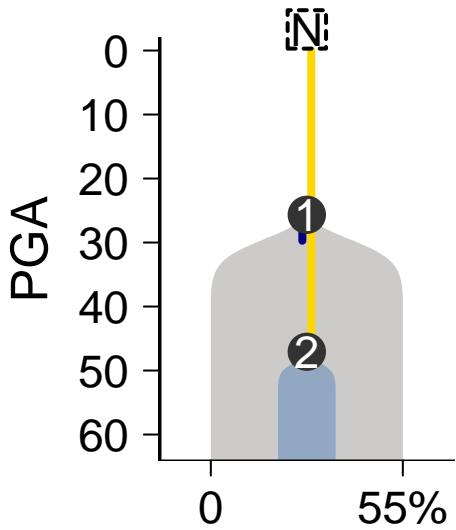

## MuTect-TITAN

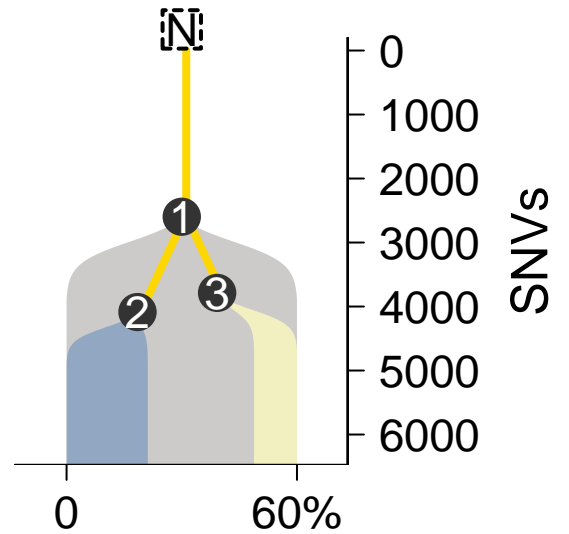

# Baca\_08-784\_T\_wgs

## SomaticSniper-Battenberg

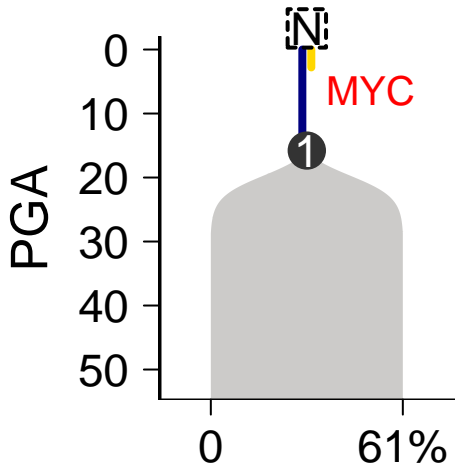

## SomaticSniper-TITAN

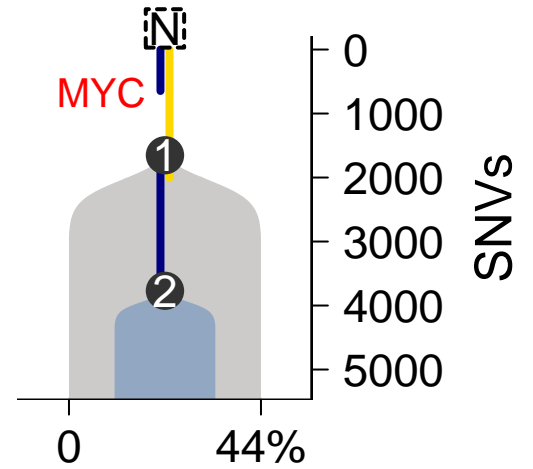

## MuTect-Battenberg

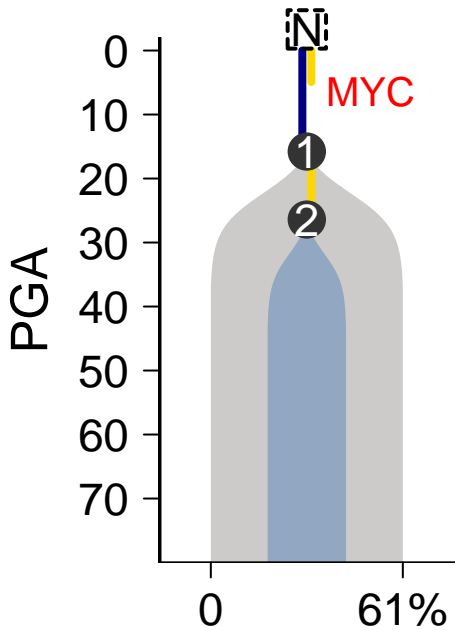

## MuTect-TITAN

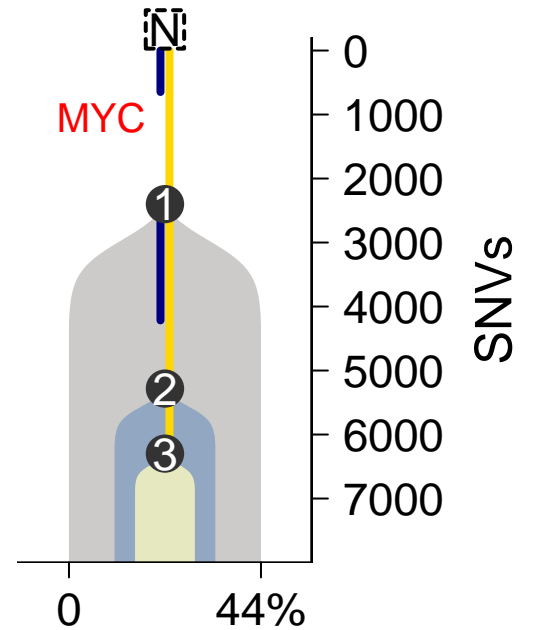

# Baca\_09-146\_T\_wgs

## SomaticSniper-Battenberg

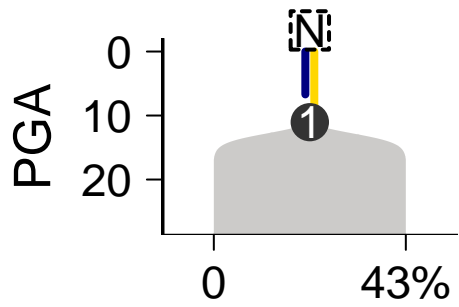

## SomaticSniper-TITAN

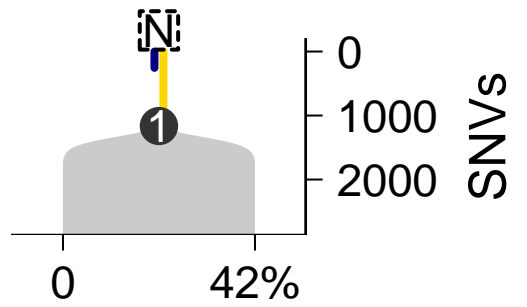

## MuTect-Battenberg

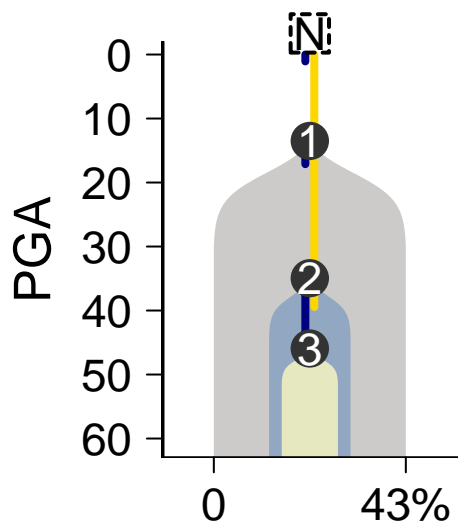

## MuTect-TITAN

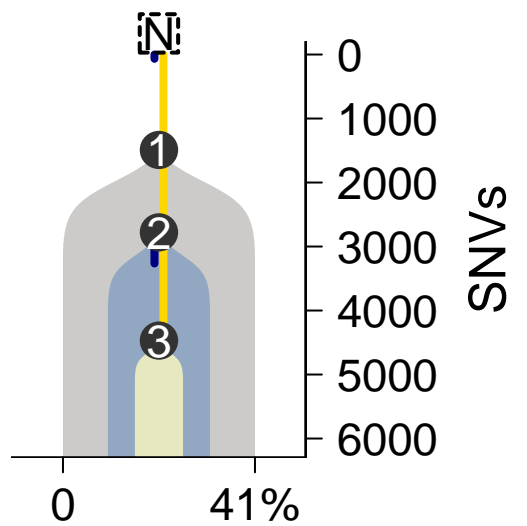

# Baca\_09-37\_T\_wgs

## SomaticSniper-Battenberg

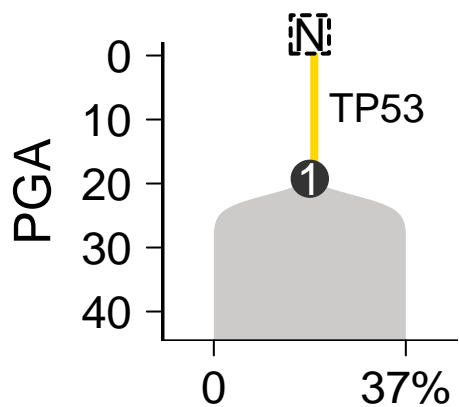

## SomaticSniper-TITAN

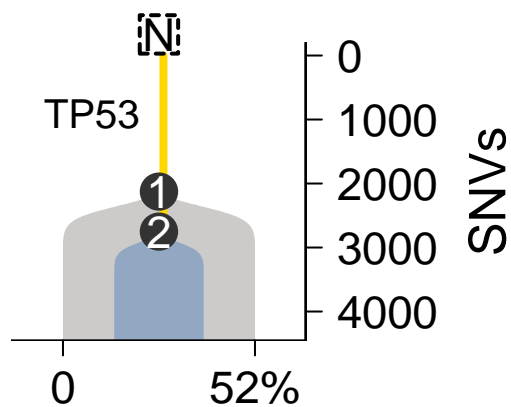

## MuTect-Battenberg

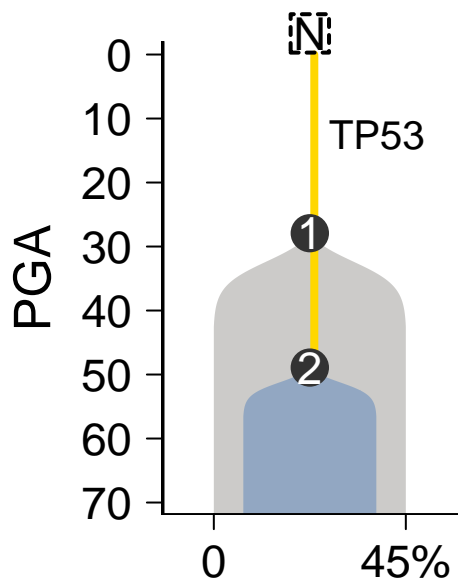

## MuTect-TITAN

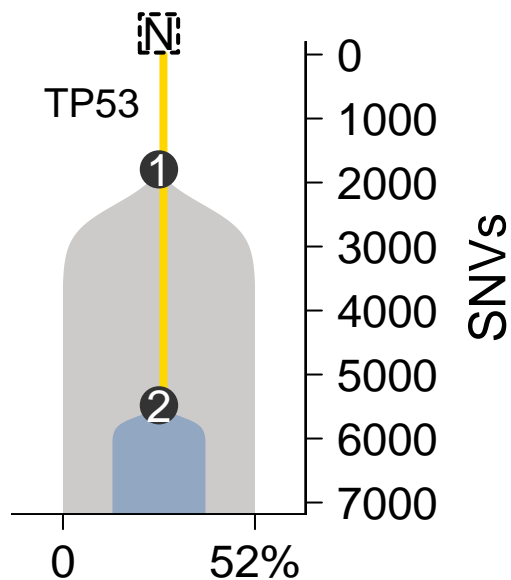

# Baca\_09-396\_T\_wgs

## SomaticSniper-Battenberg

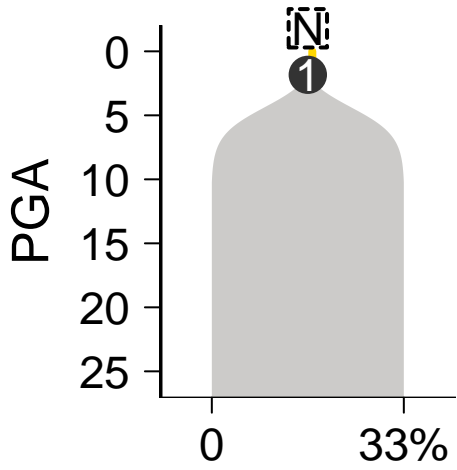

## SomaticSniper-TITAN

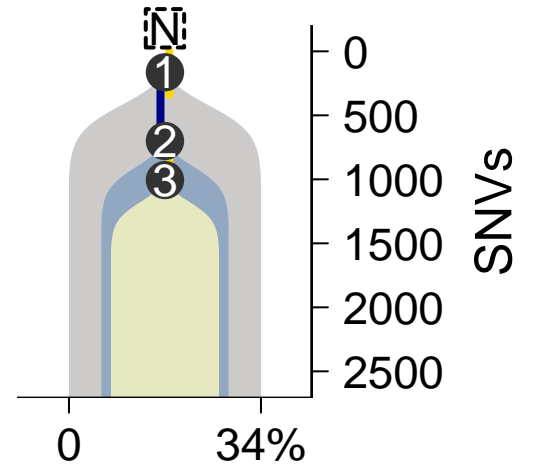

## MuTect-Battenberg

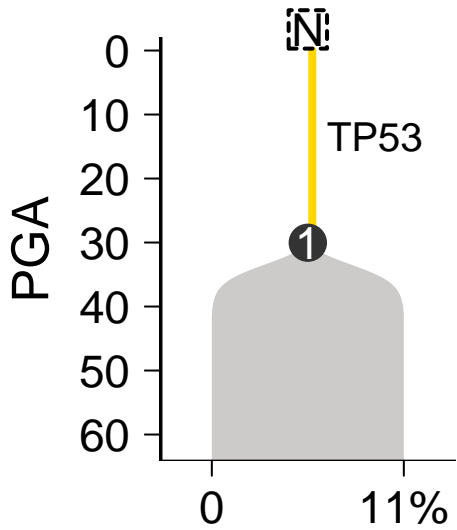

## MuTect-TITAN

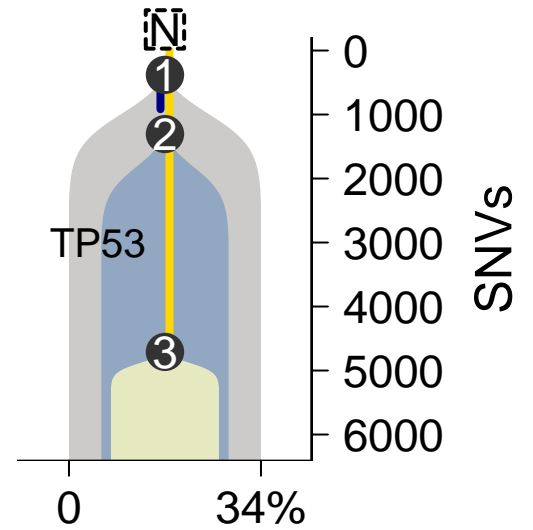



# Baca\_09-3983\_T\_wgs

## SomaticSniper-Battenberg

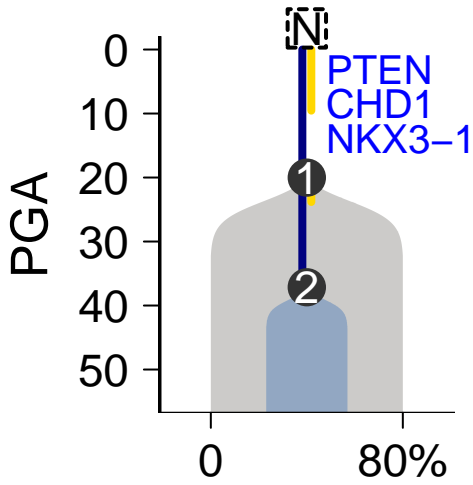

## SomaticSniper-TITAN

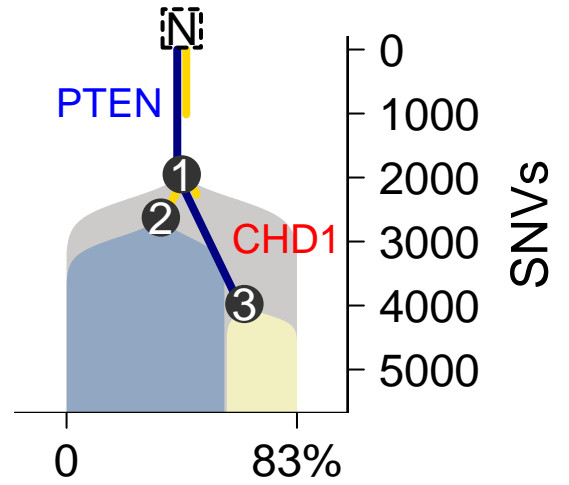

## MuTect-Battenberg

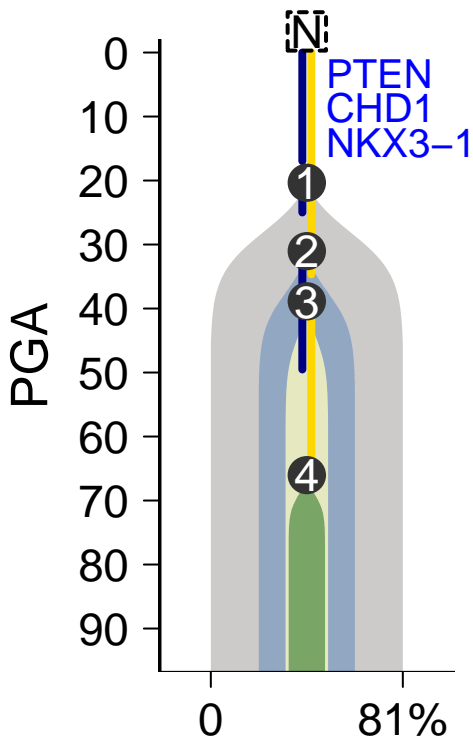

## MuTect-TITAN

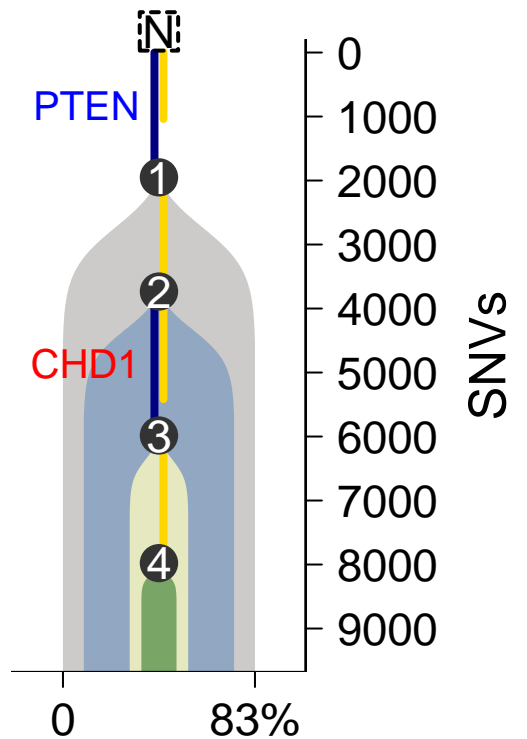

# Baca\_09-601\_T\_wgs

## SomaticSniper-Battenberg

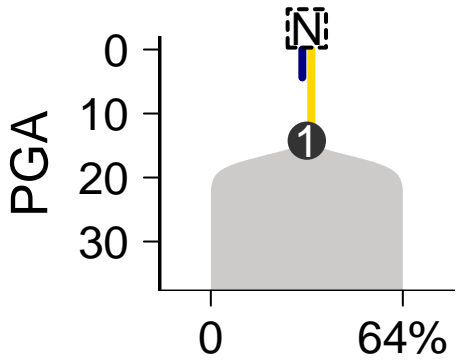

## SomaticSniper-TITAN

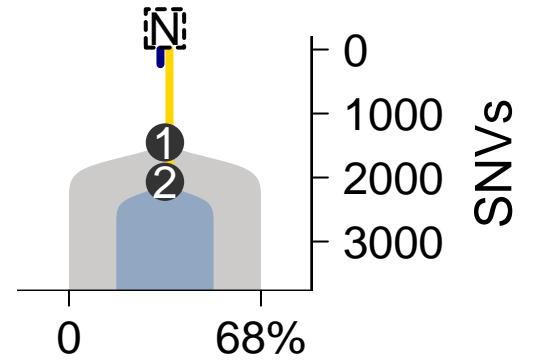

## MuTect-Battenberg

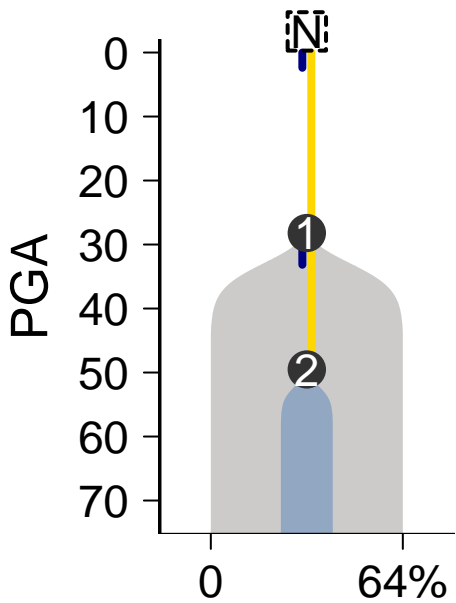

## MuTect-TITAN

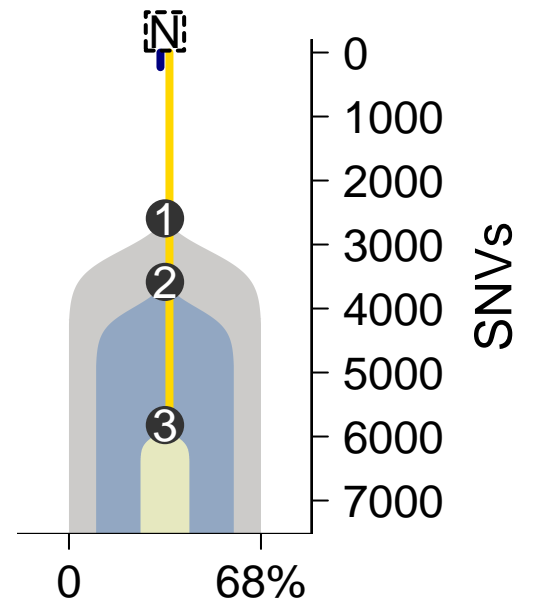

# Baca\_09-628\_T\_wgs

## SomaticSniper-Battenberg

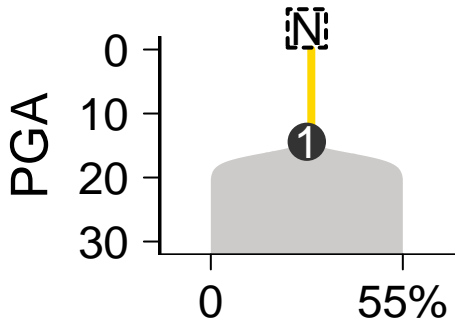

## SomaticSniper-TITAN

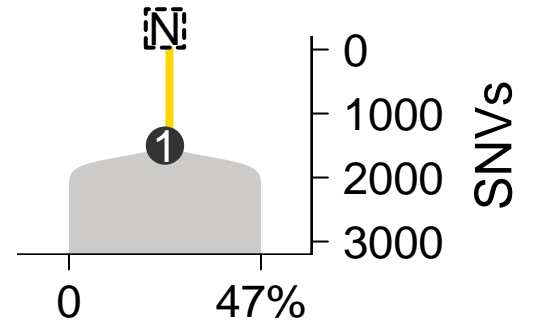

## MuTect-Battenberg

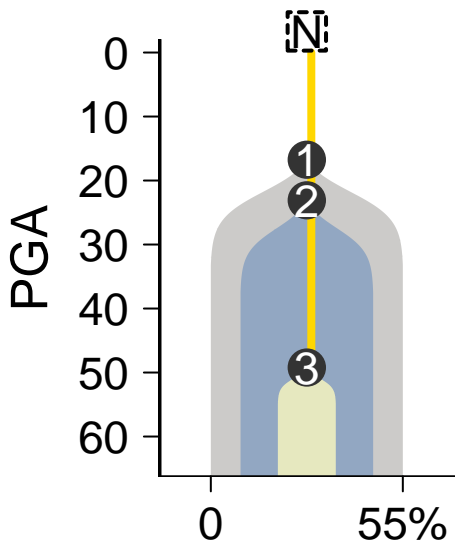

## MuTect-TITAN

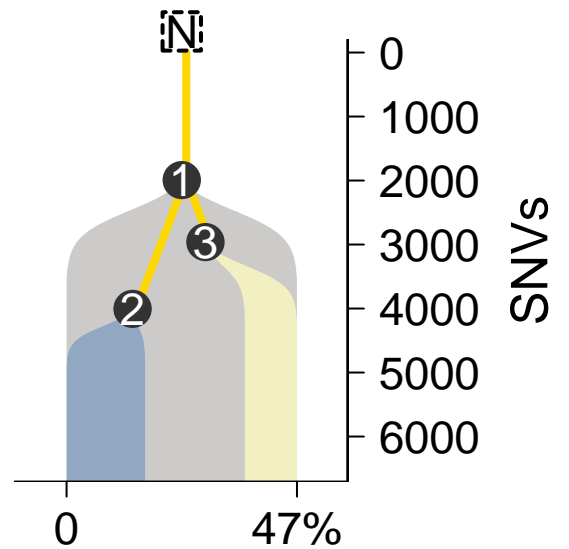

# Baca\_09-730\_T\_wgs

## SomaticSniper-Battenberg

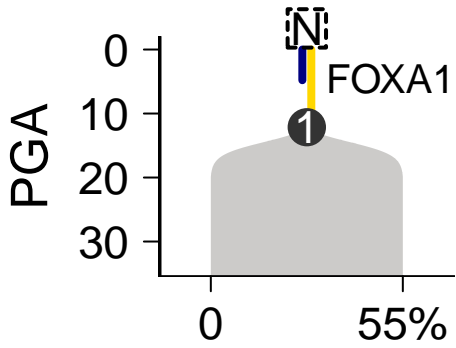

## SomaticSniper-TITAN

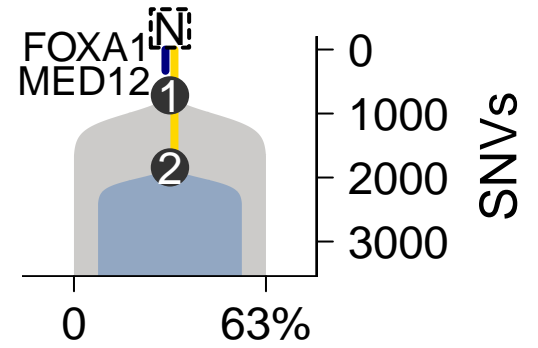

## MuTect-Battenberg

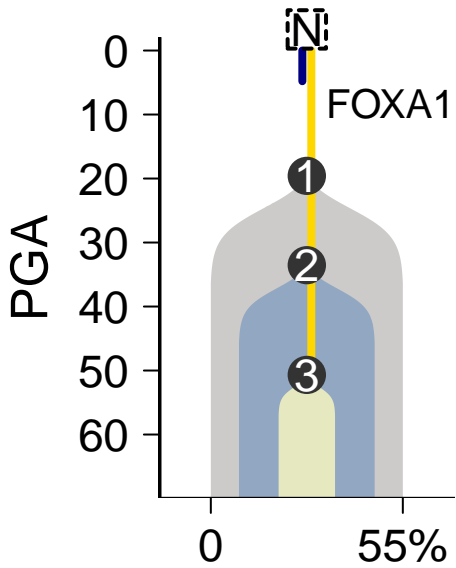

## MuTect-TITAN

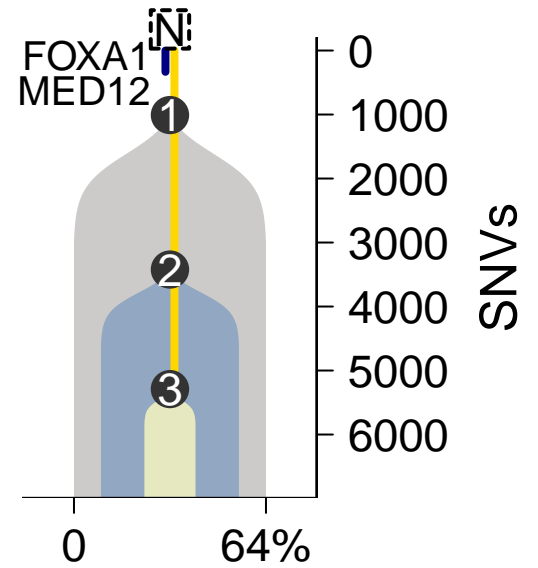

# Baca\_STID0000000410\_T\_wgs

## SomaticSniper-Battenberg

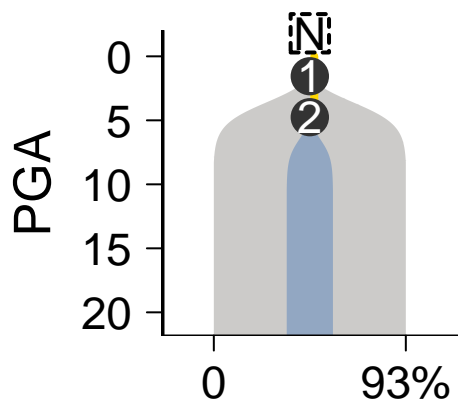

## SomaticSniper-TITAN

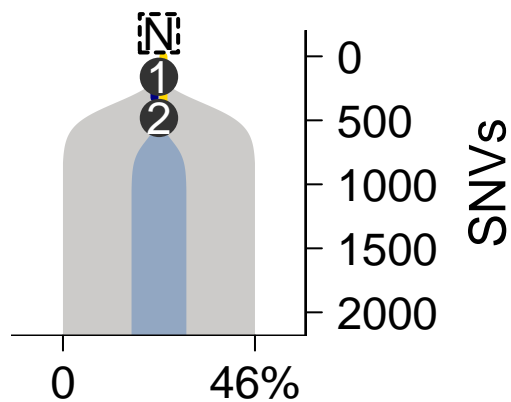

## MuTect-Battenberg

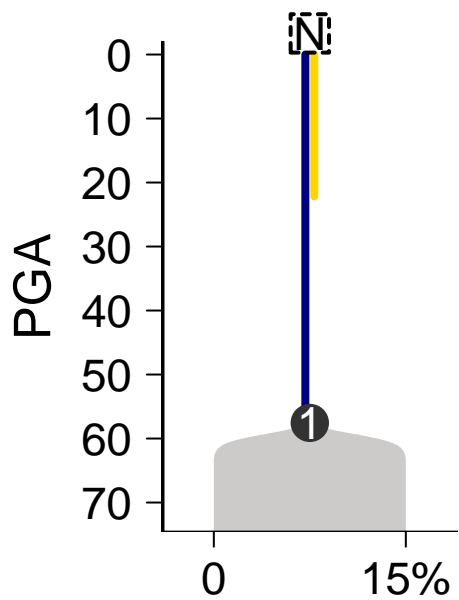

## MuTect-TITAN

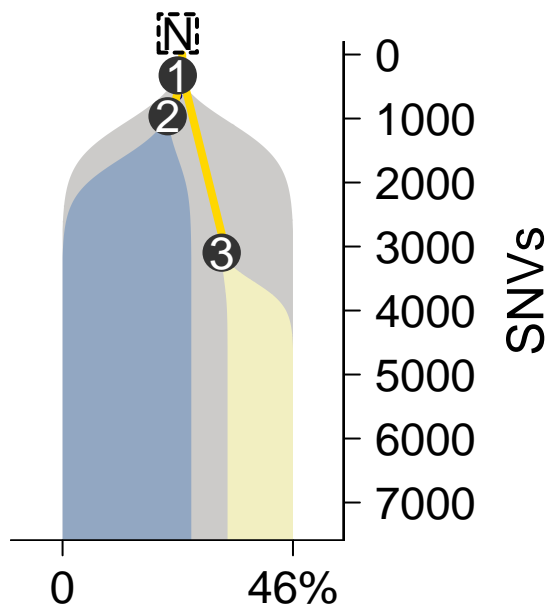

# Baca\_STID0000000415\_T\_wgs

## SomaticSniper-Battenberg

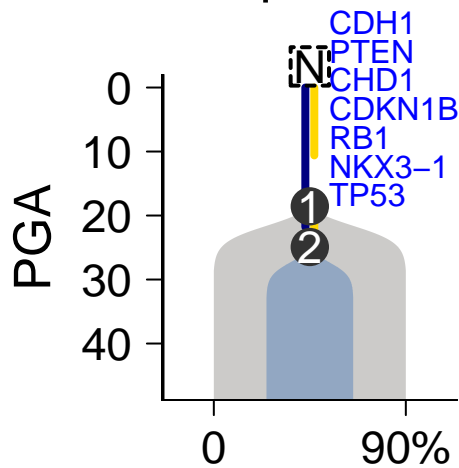

## SomaticSniper-TITAN

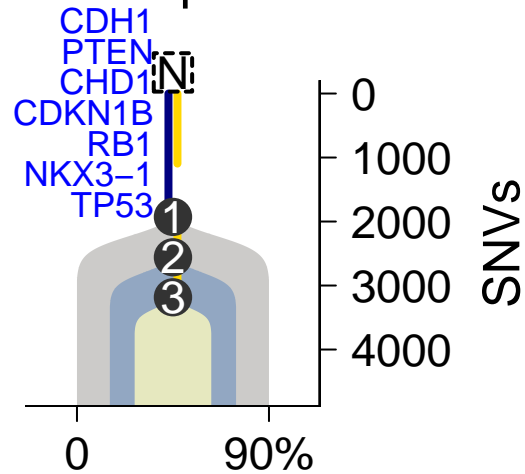

## MuTect-Battenberg

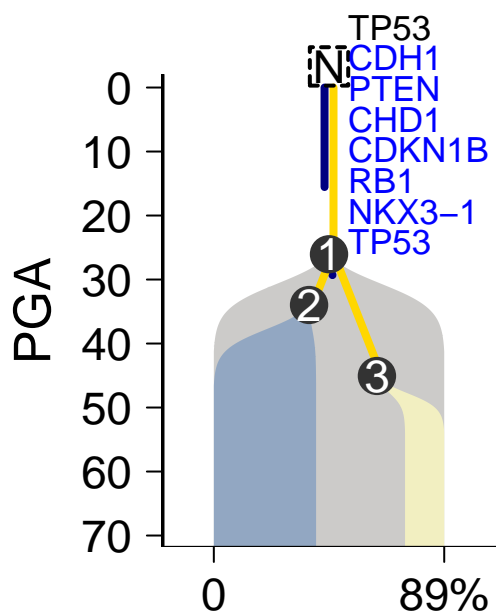

## MuTect-TITAN

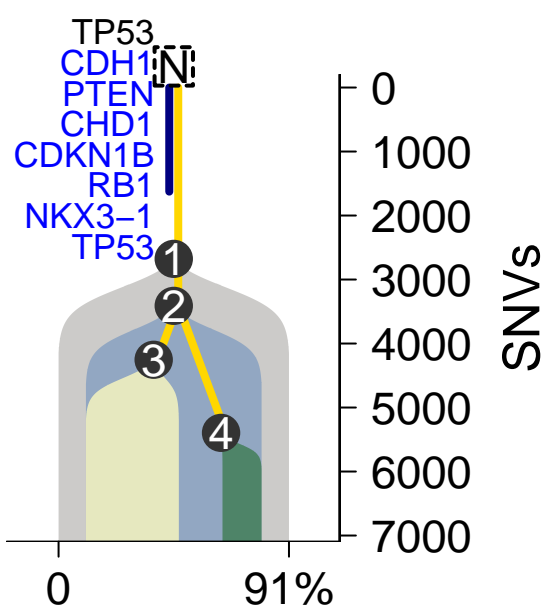

# Baca\_STID0000002525\_T\_wgs

## SomaticSniper-Battenberg

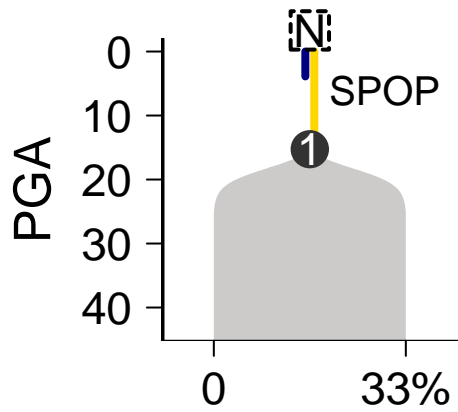

## SomaticSniper-TITAN

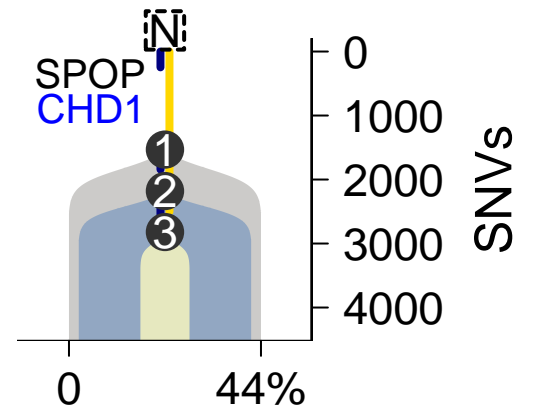

## MuTect-Battenberg

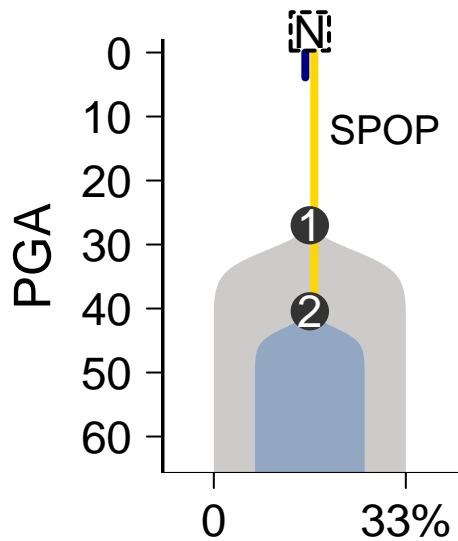

## MuTect-TITAN

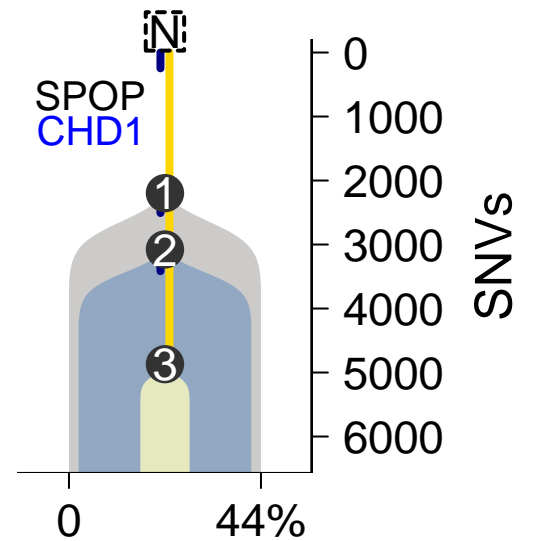

# Baca\_STID0000002621\_T\_wgs

## SomaticSniper-Battenberg

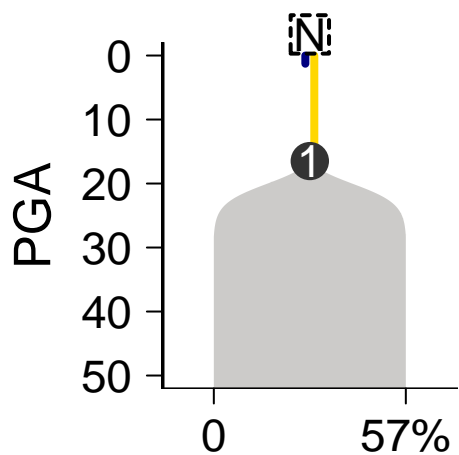

## SomaticSniper-TITAN

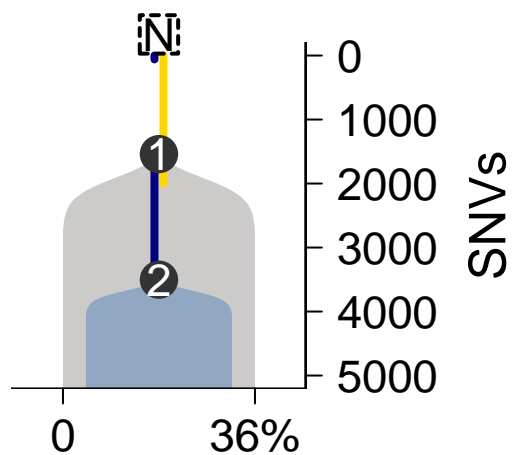

## MuTect-Battenberg

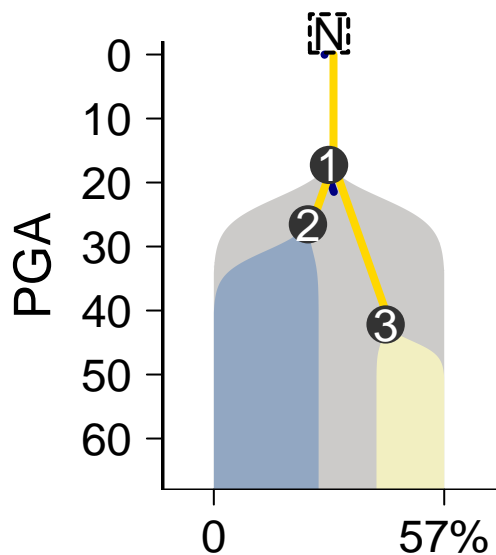

## MuTect-TITAN

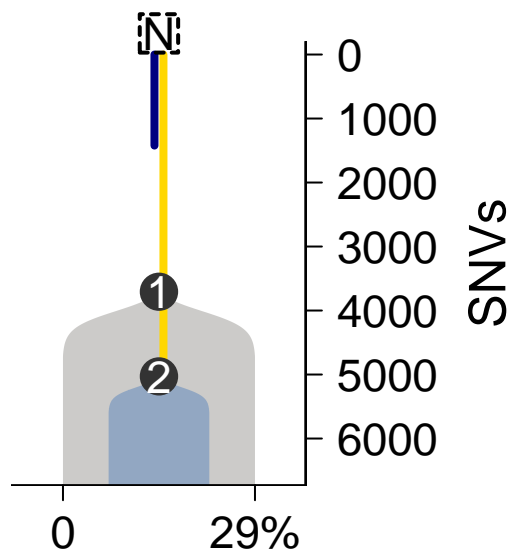



# Baca\_STID0000002682\_T\_wgs

## SomaticSniper-Battenberg

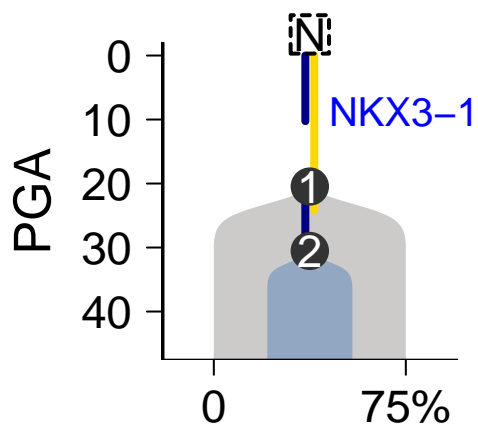

## SomaticSniper-TITAN

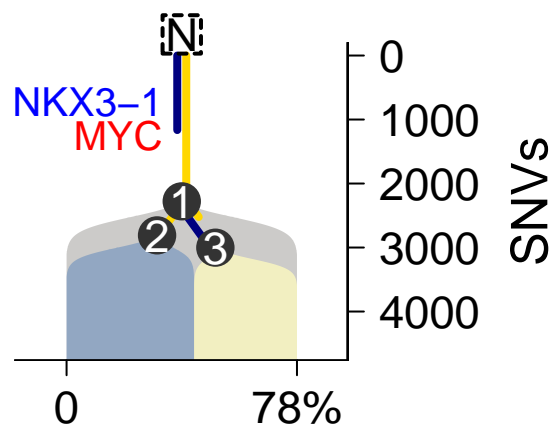

## MuTect-Battenberg

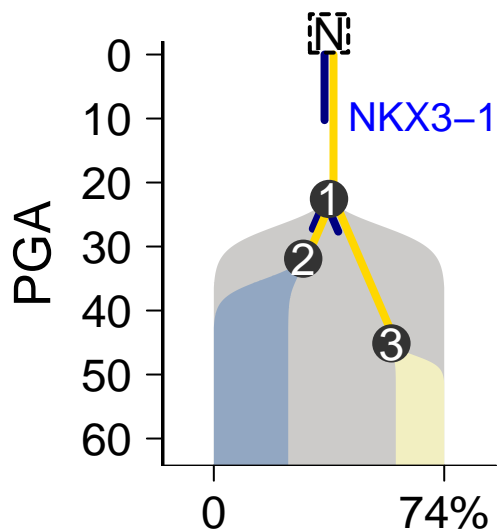

## MuTect-TITAN

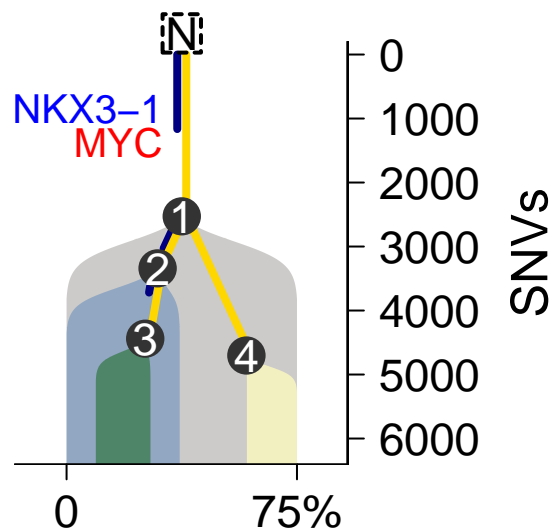

# Baca\_STID0000002741\_T\_wgs

## SomaticSniper-Battenberg

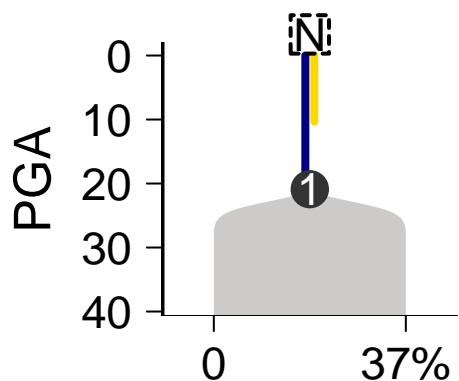

## SomaticSniper-TITAN

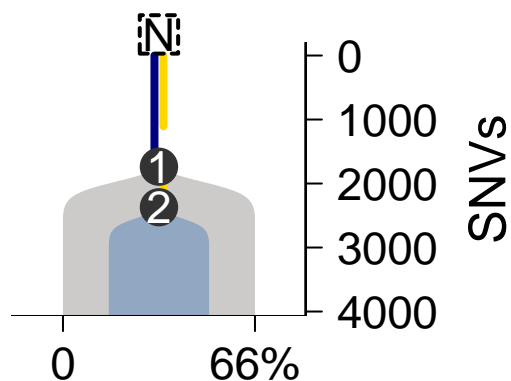

## MuTect-Battenberg

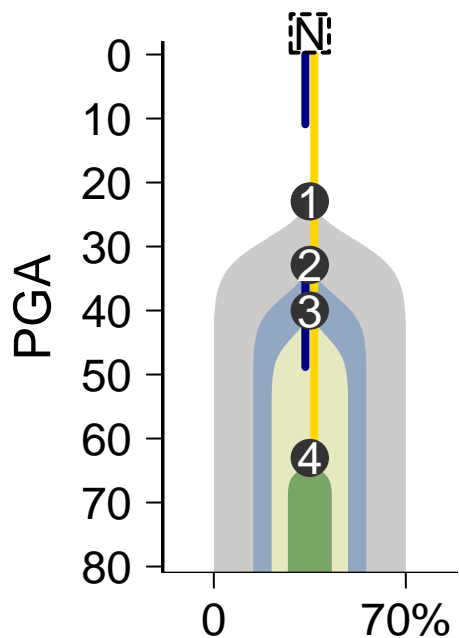

## MuTect-TITAN

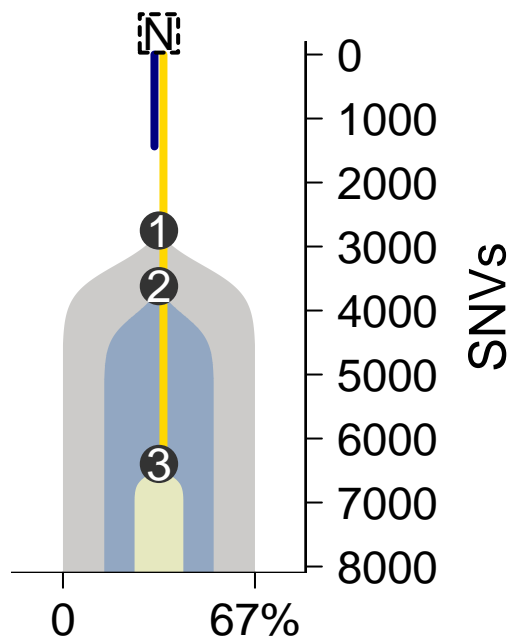

# Baca\_STID0000002872\_T\_wgs

## SomaticSniper-Battenberg

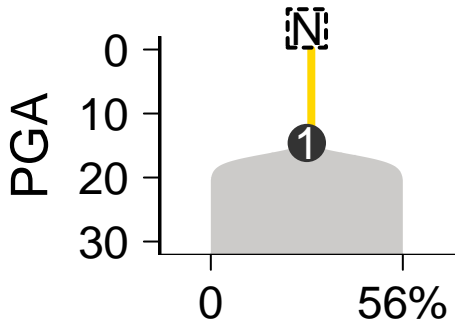

## SomaticSniper-TITAN

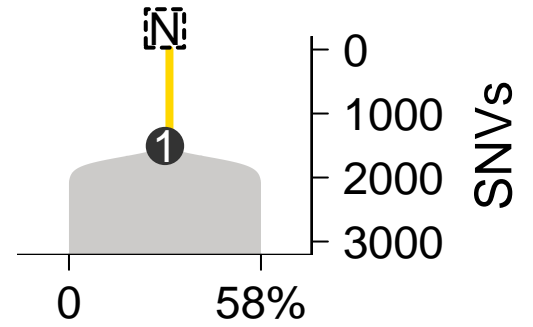

## MuTect-Battenberg

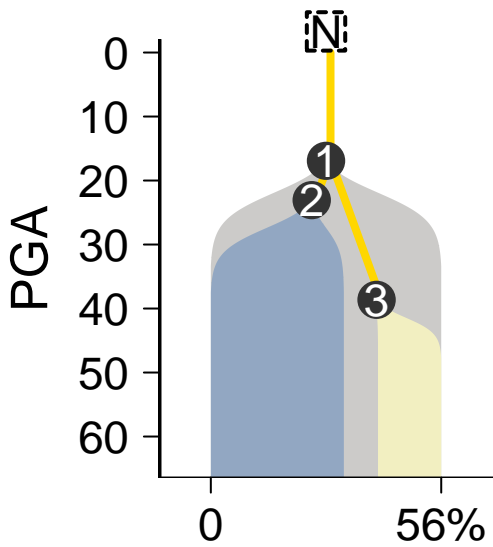

## MuTect-TITAN

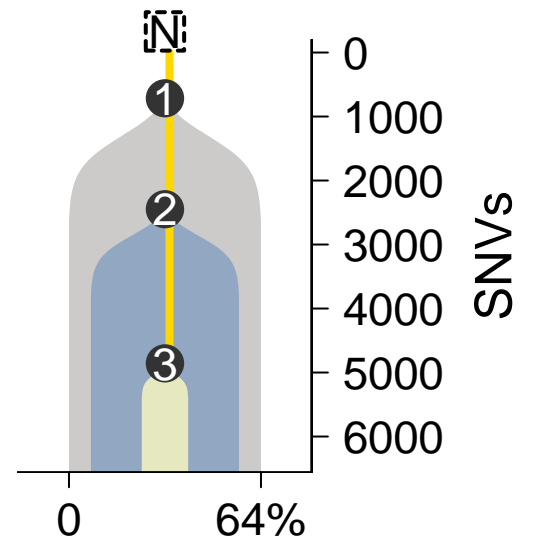

# Baca\_STID0000003042\_T\_wgs

## SomaticSniper-Battenberg

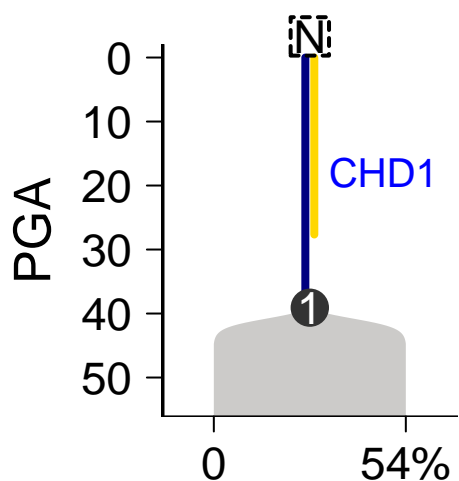

## SomaticSniper-TITAN

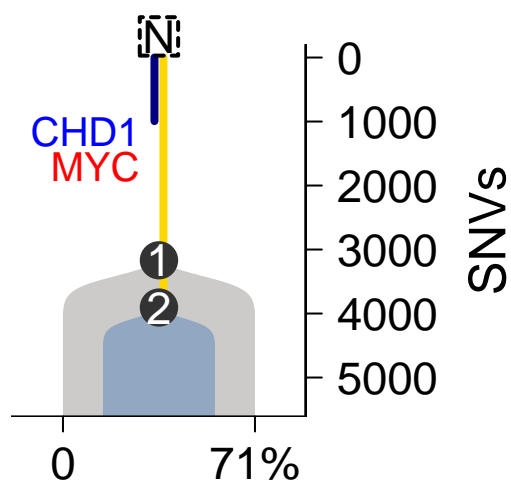

## MuTect-Battenberg

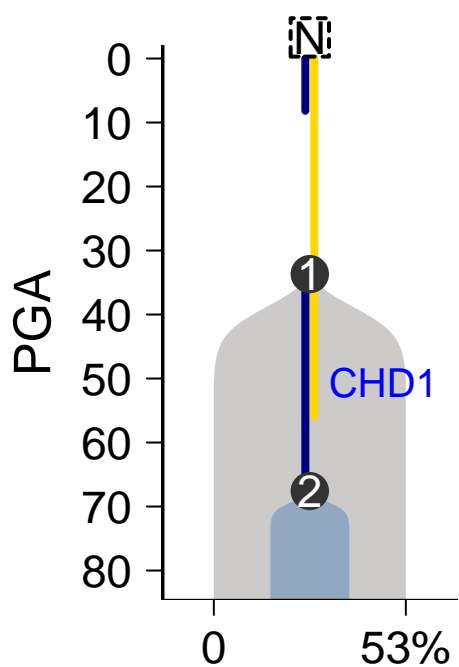

## MuTect-TITAN

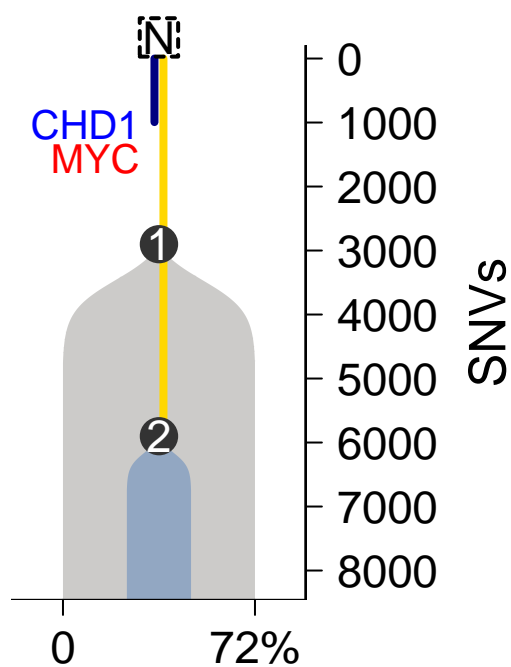

# Baca\_STID0000003127\_T\_wgs

## SomaticSniper-Battenberg

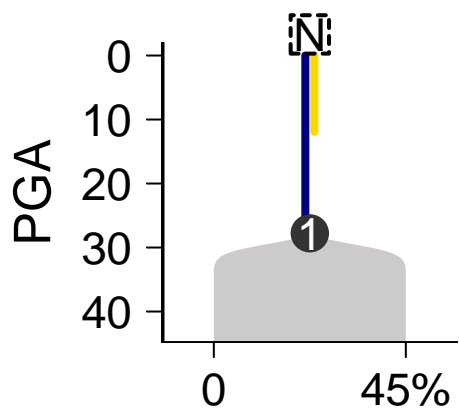

## SomaticSniper-TITAN

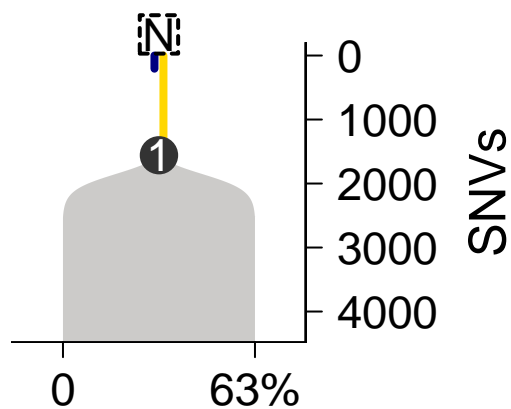

## MuTect-Battenberg

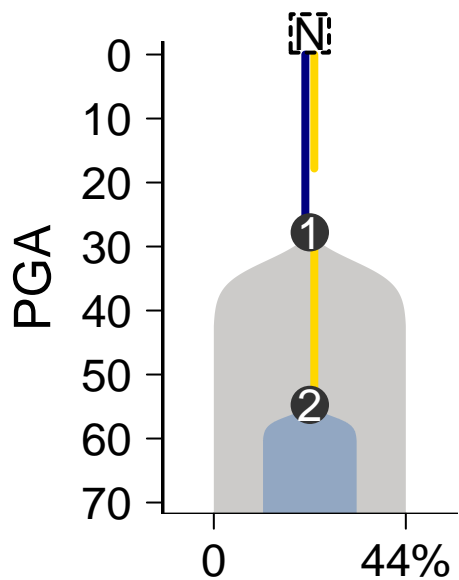

## MuTect-TITAN

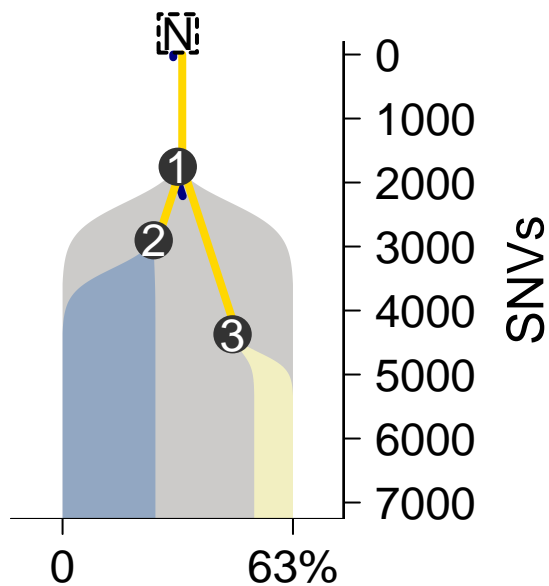

# Berger\_0508\_T\_wgs

## SomaticSniper-Battenberg

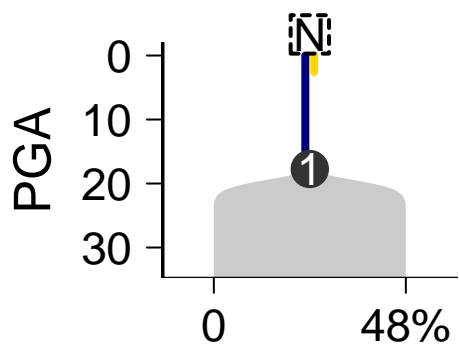

## SomaticSniper-TITAN

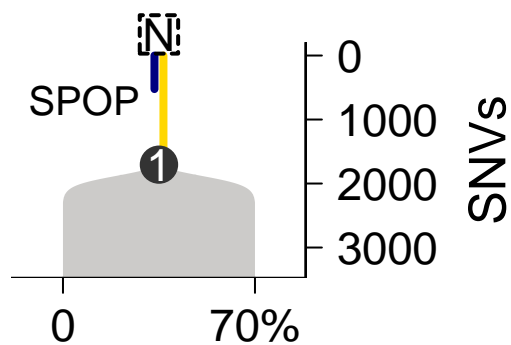

## MuTect-Battenberg

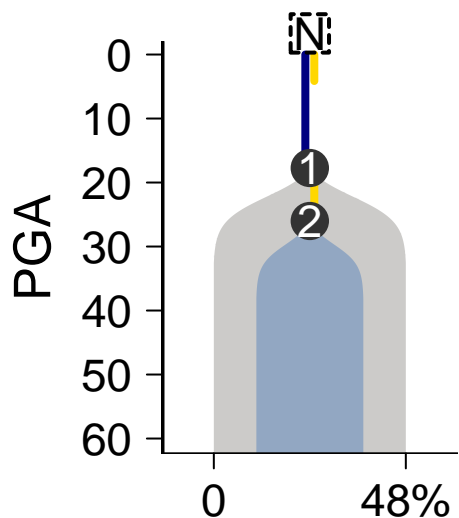

## MuTect-TITAN

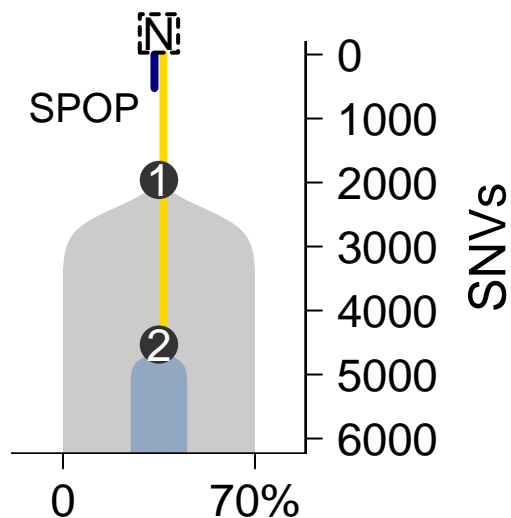

# Berger\_0581\_T\_wgs

## SomaticSniper-Battenberg

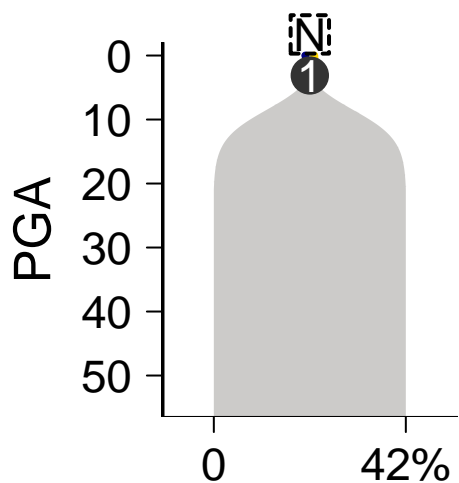

## SomaticSniper-TITAN

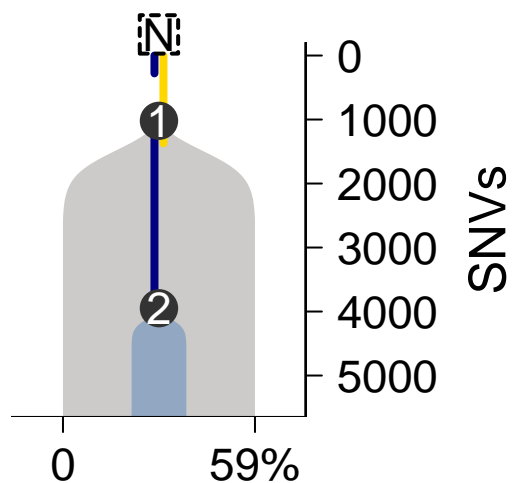

## MuTect-Battenberg

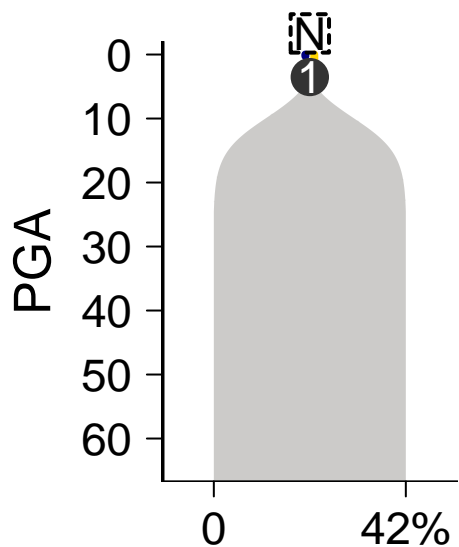

## MuTect-TITAN

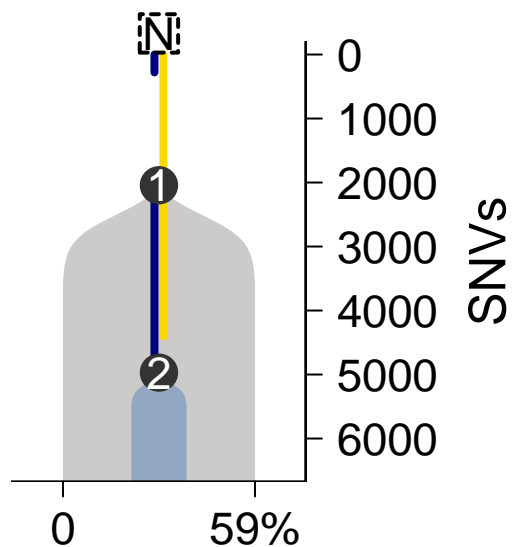

# Berger\_1701\_T\_wgs

## SomaticSniper-Battenberg

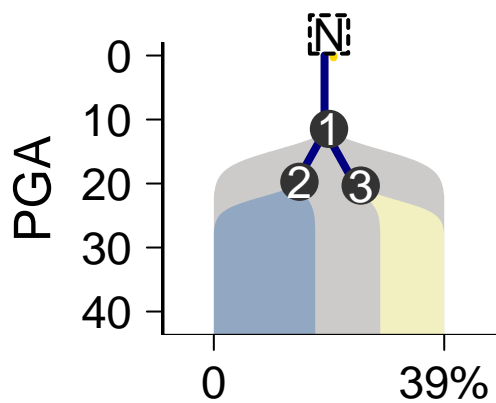

## SomaticSniper-TITAN

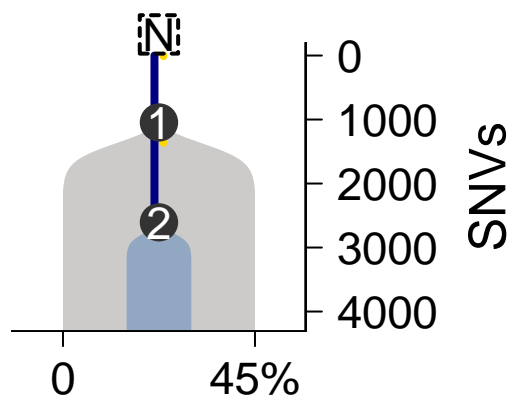

## MuTect-Battenberg

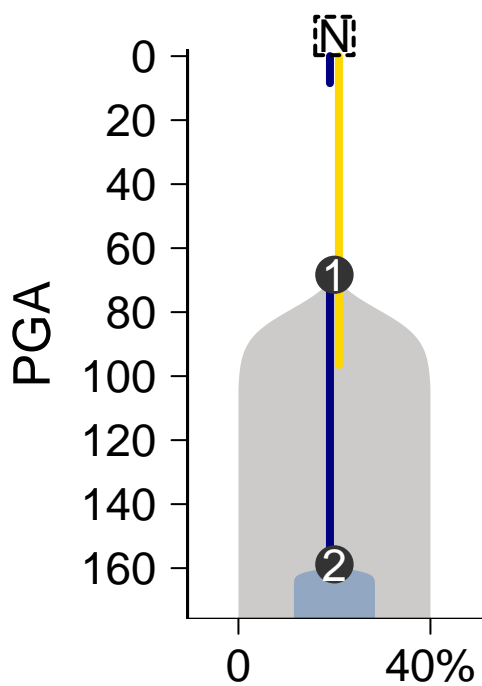

## MuTect-TITAN

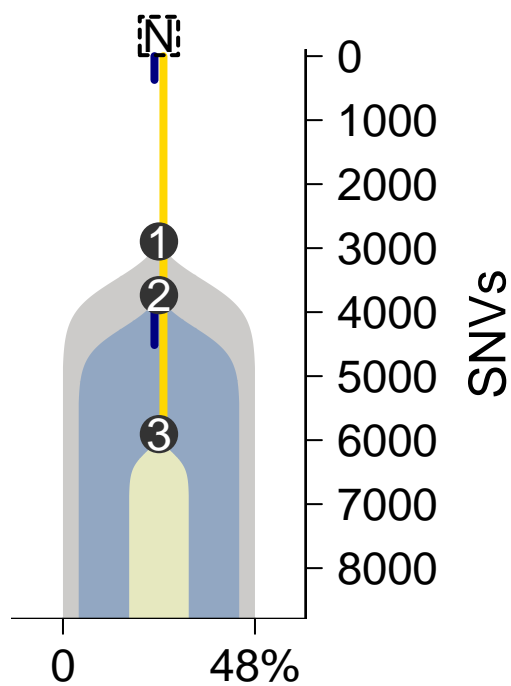



# Berger\_1783\_T\_wgs

## SomaticSniper-Battenberg

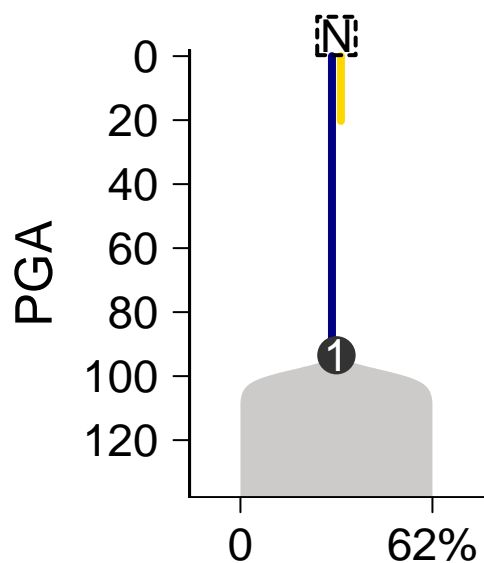

## SomaticSniper-TITAN

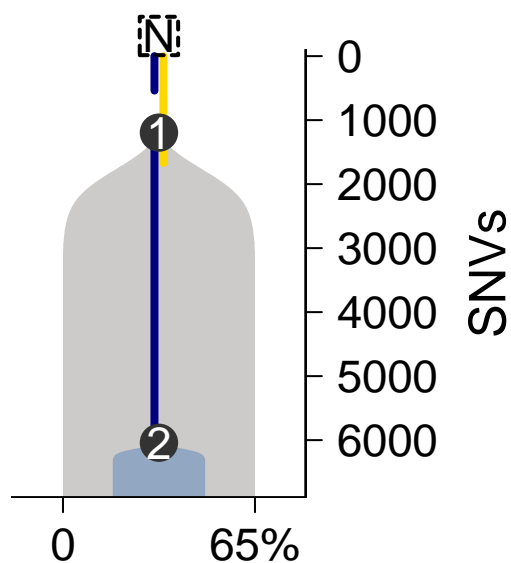

## MuTect-Battenberg

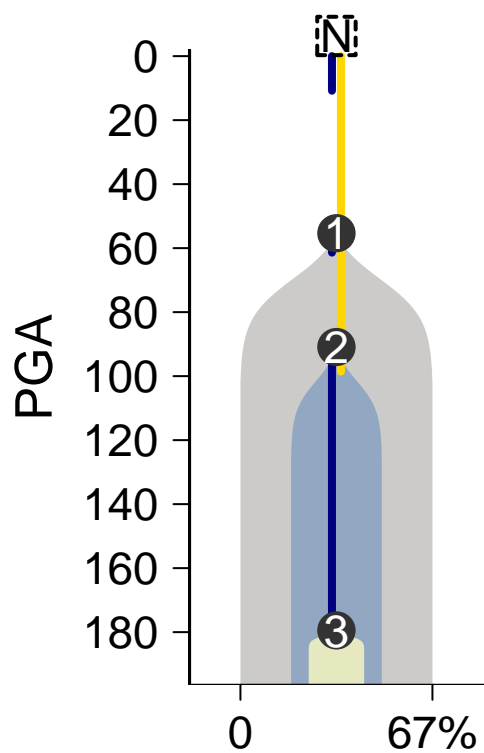

## MuTect-TITAN

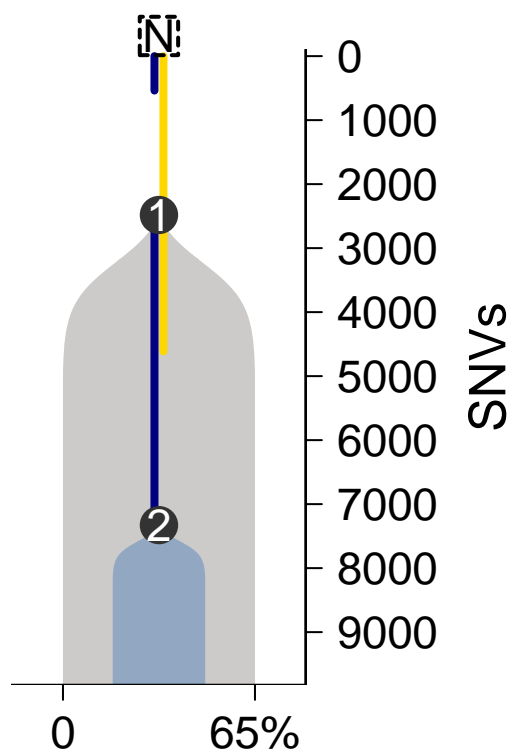

# Berger\_2832\_T\_wgs

## SomaticSniper-Battenberg

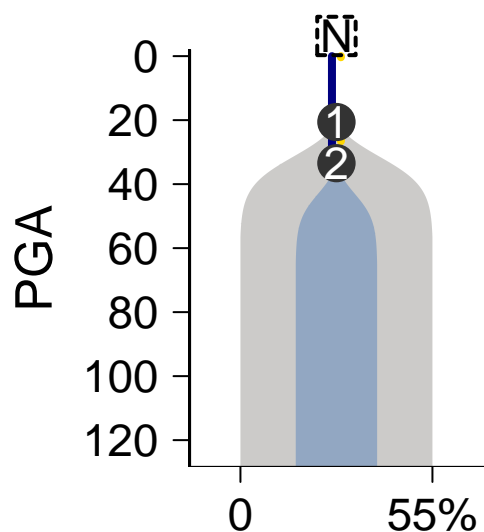

## SomaticSniper-TITAN

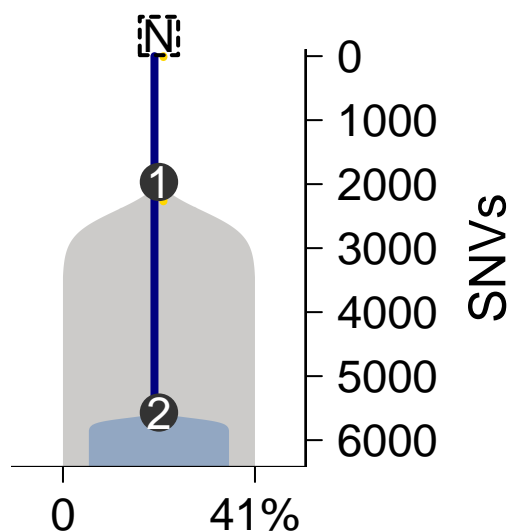

## MuTect-Battenberg

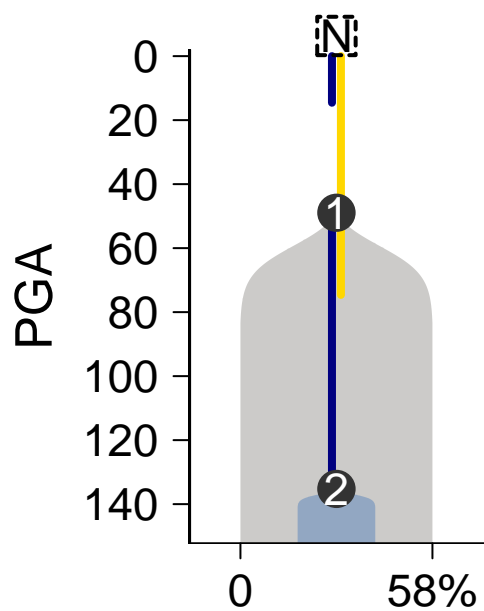

## MuTect-TITAN

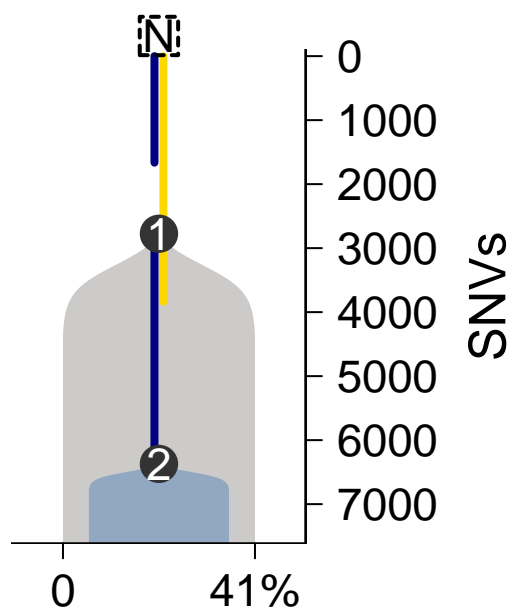

# Berger\_3027\_T\_wgs

## SomaticSniper-Battenberg

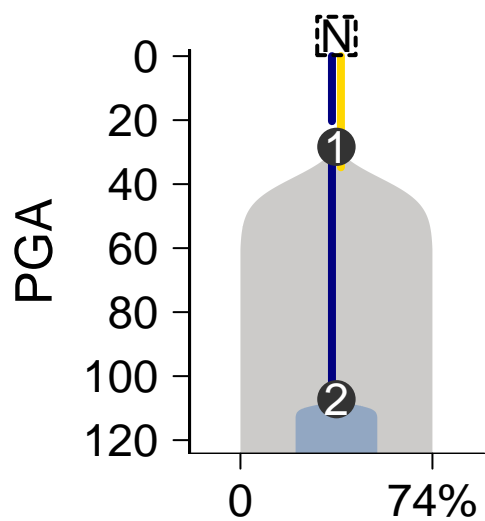

## SomaticSniper-TITAN

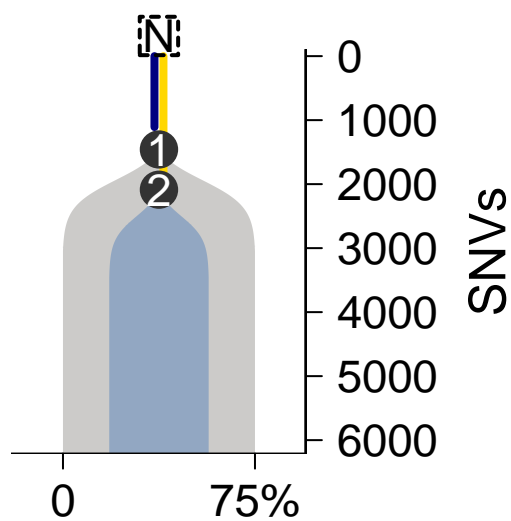

## MuTect-Battenberg

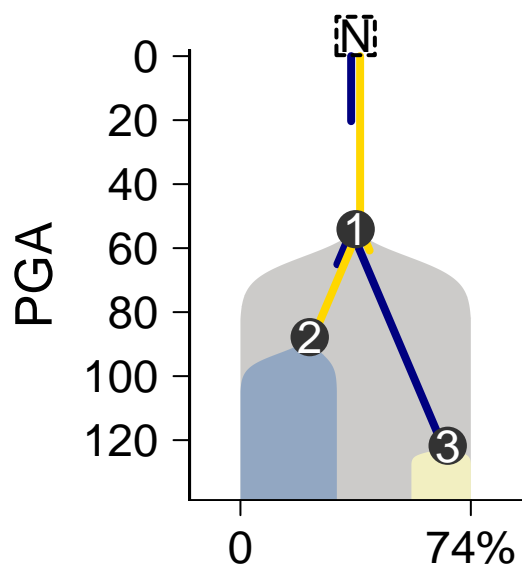

## MuTect-TITAN

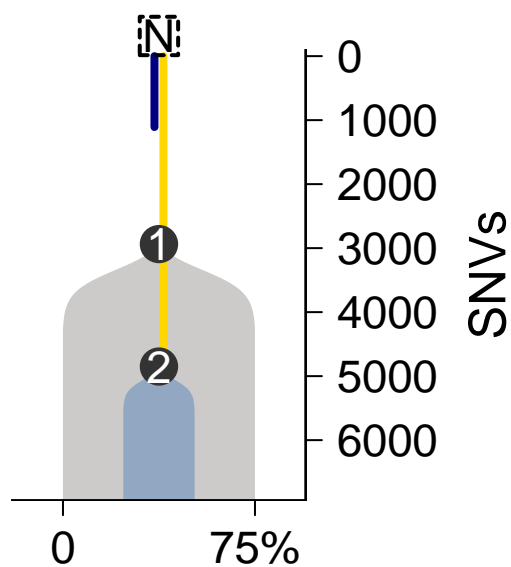

# Berger\_3043\_T\_wgs

## SomaticSniper-Battenberg

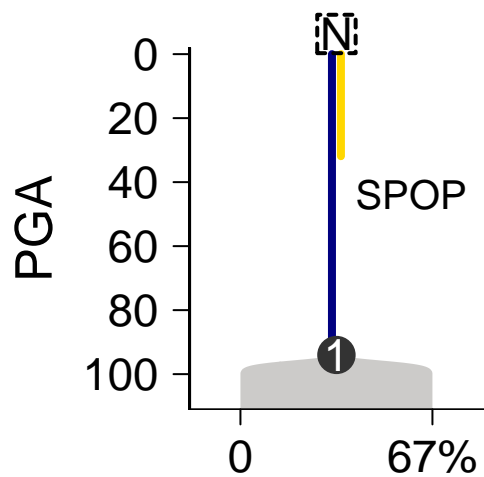

## SomaticSniper-TITAN

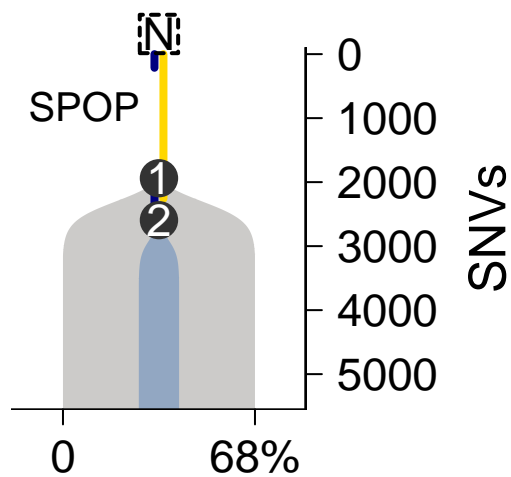

## MuTect-Battenberg

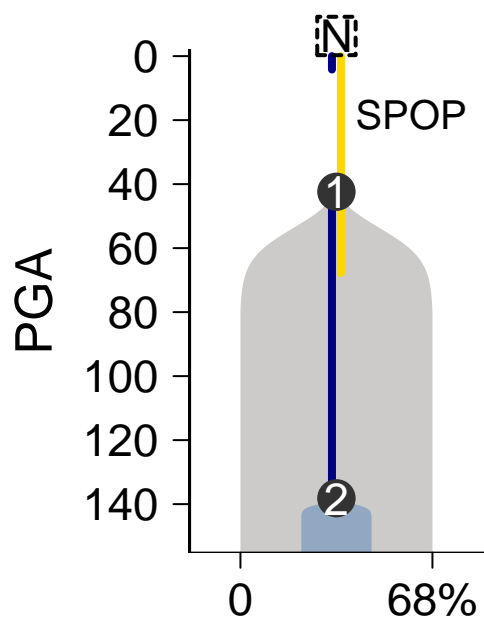

## MuTect-TITAN

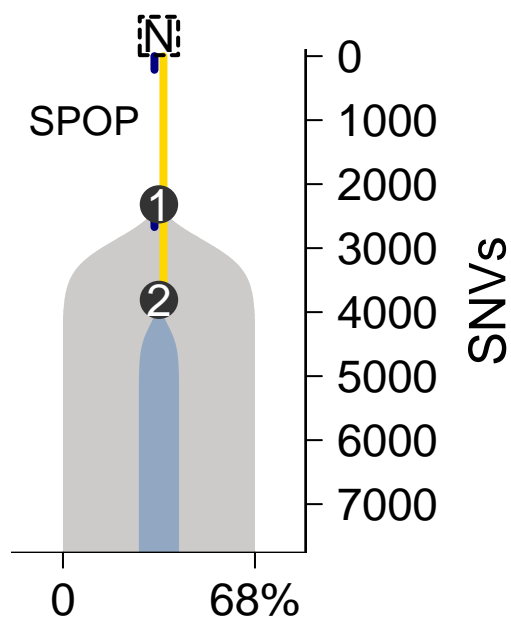

# CPCG0001

## SomaticSniper-Battenberg

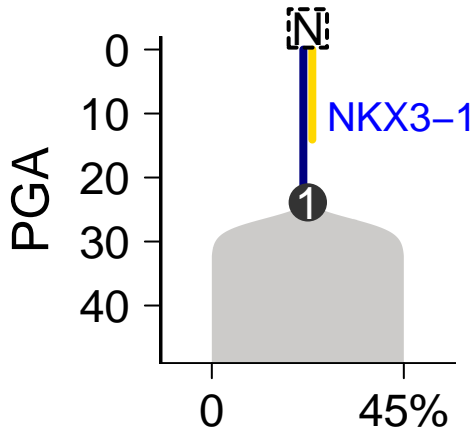

## SomaticSniper-TITAN

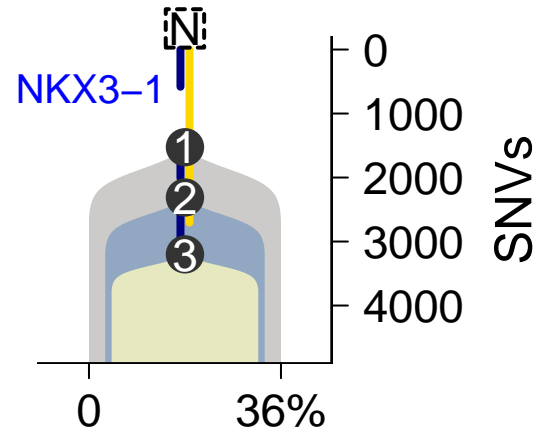

## MuTect-Battenberg

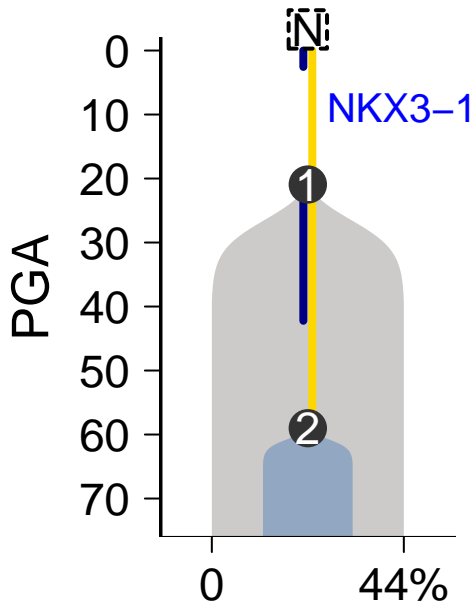

## MuTect-TITAN

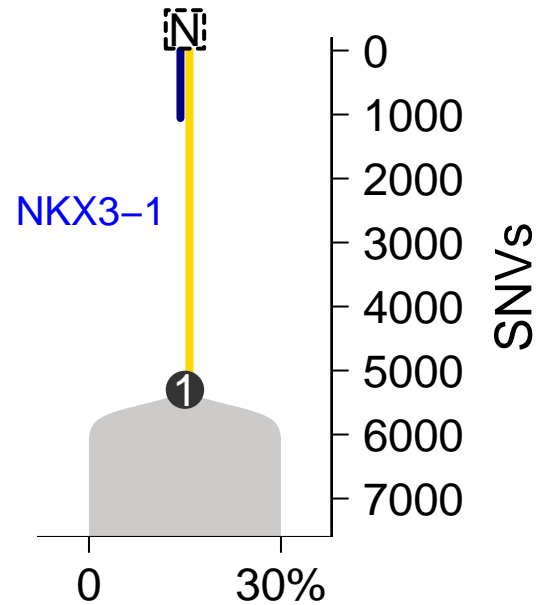

# CPCG0003

## SomaticSniper-Battenberg

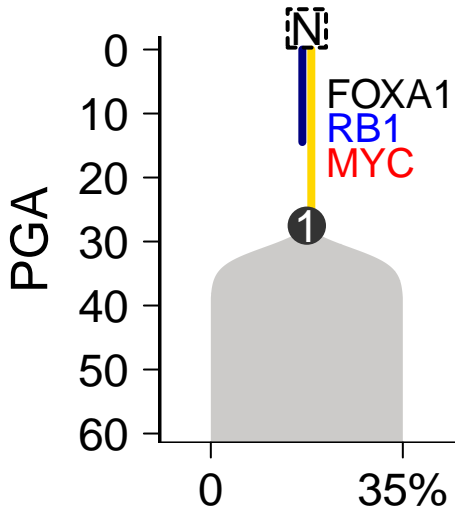

## SomaticSniper-TITAN

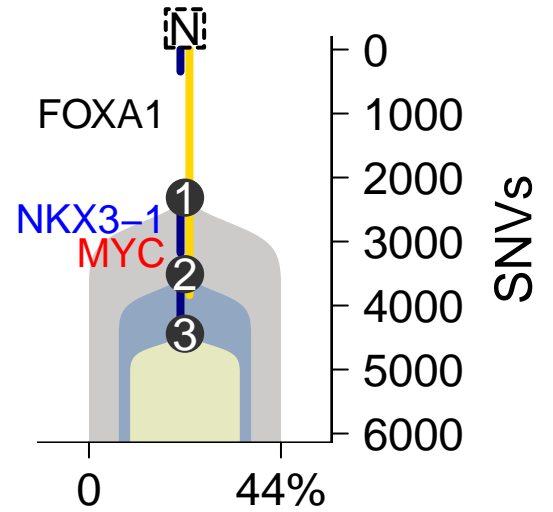

## MuTect-Battenberg

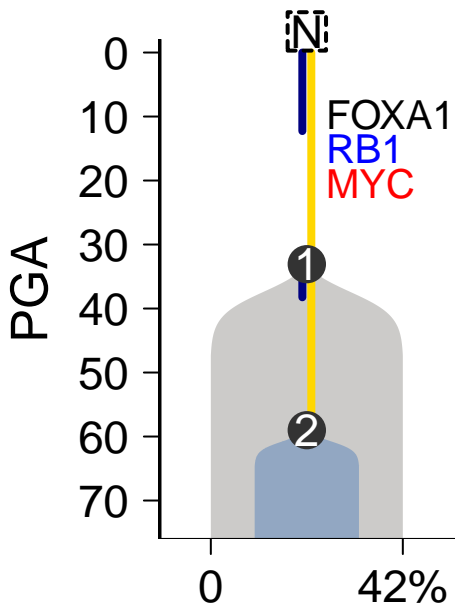

## MuTect-TITAN

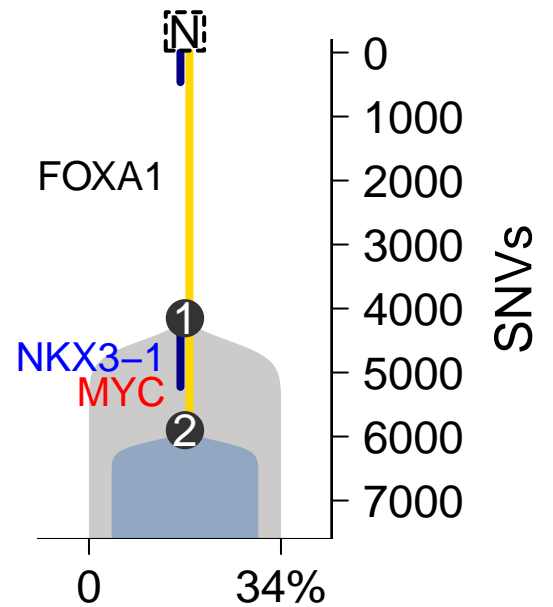

# CPCG0004

## SomaticSniper-Battenberg

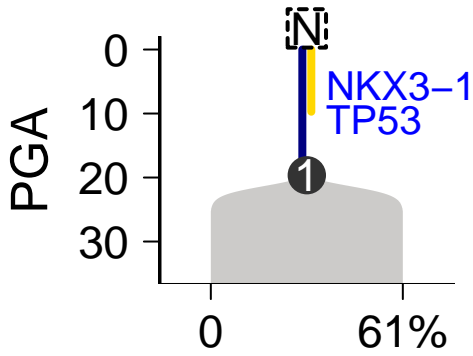

## SomaticSniper-TITAN

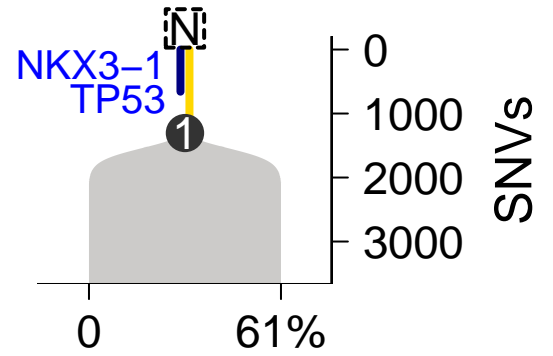

## MuTect-Battenberg

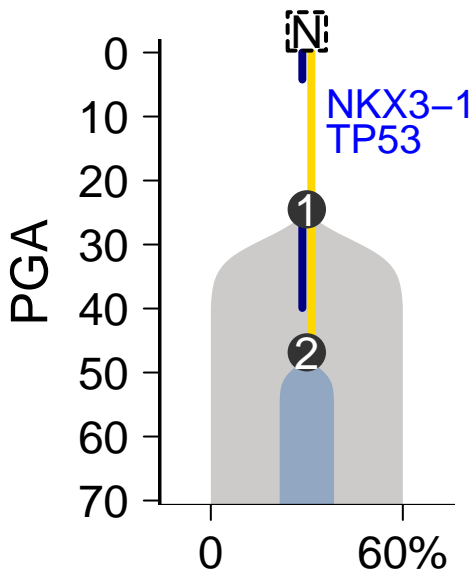

## MuTect-TITAN

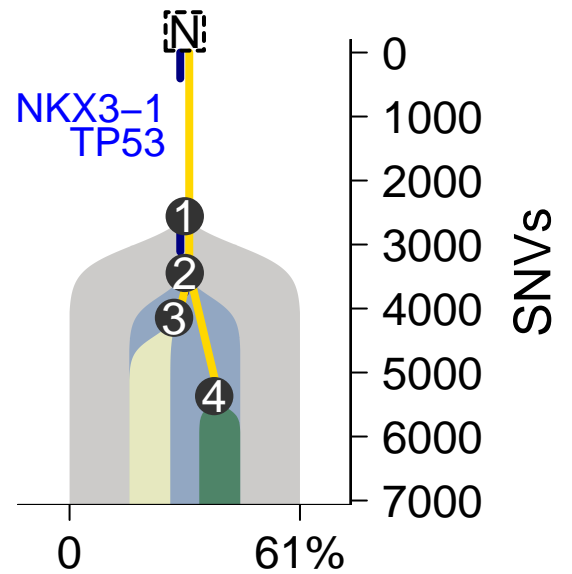

# CPCG0006

## SomaticSniper-Battenberg

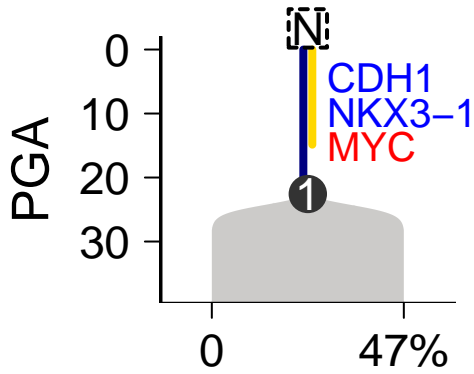

## SomaticSniper-TITAN

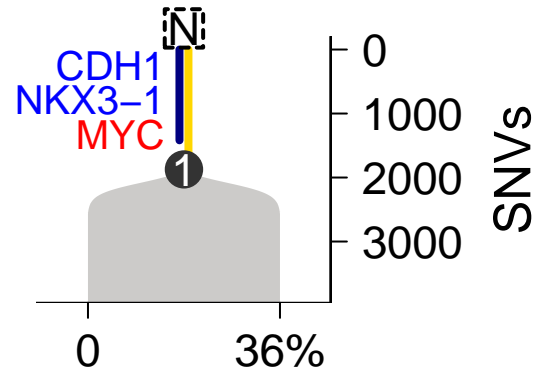

## MuTect-Battenberg

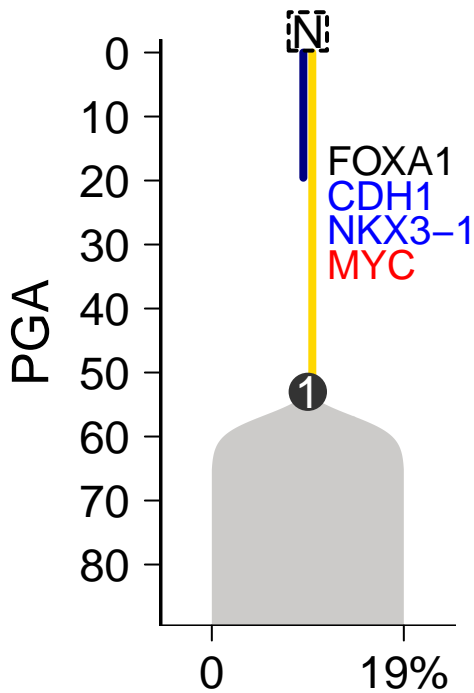

## MuTect-TITAN

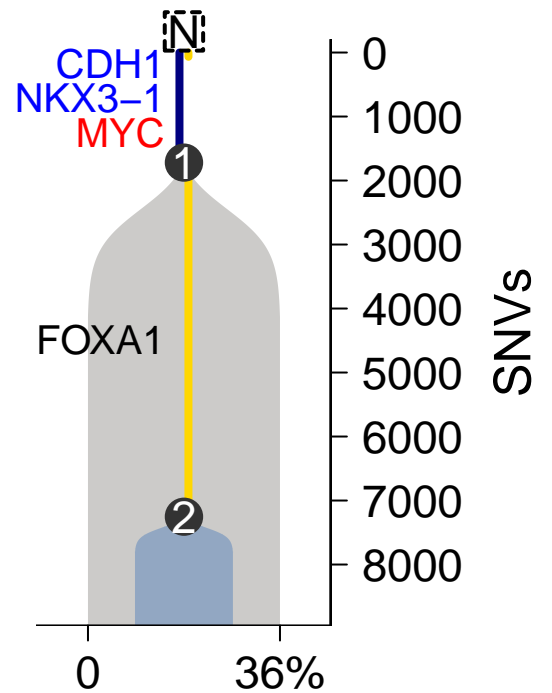



# CPCG0007

## SomaticSniper-Battenberg

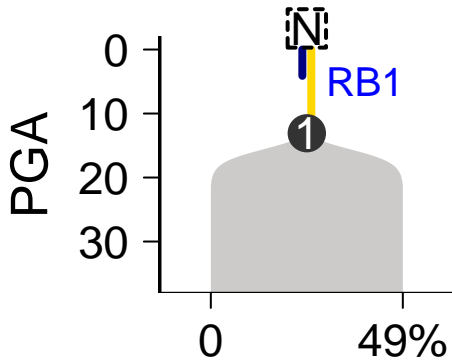

## SomaticSniper-TITAN

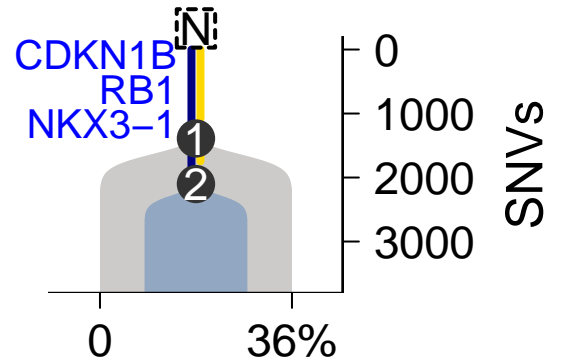

## MuTect-Battenberg

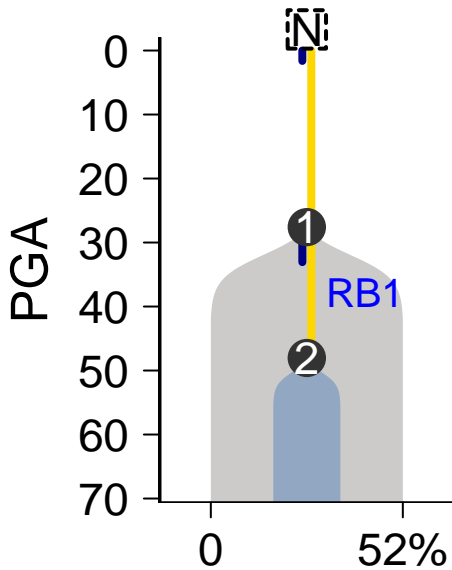

## MuTect-TITAN

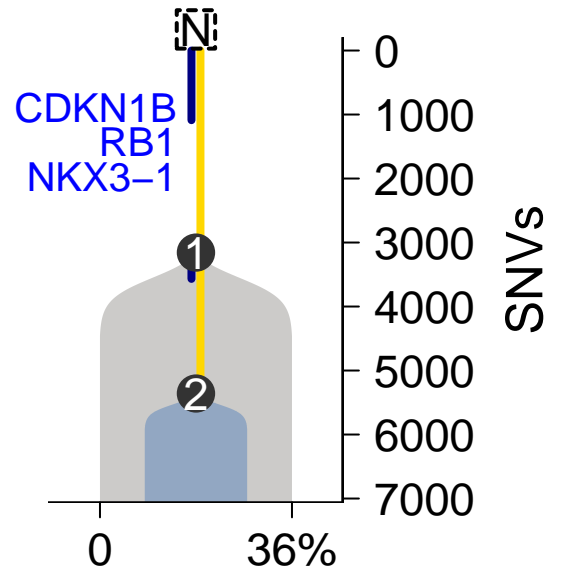

# CPCG0015

## SomaticSniper–Battenberg

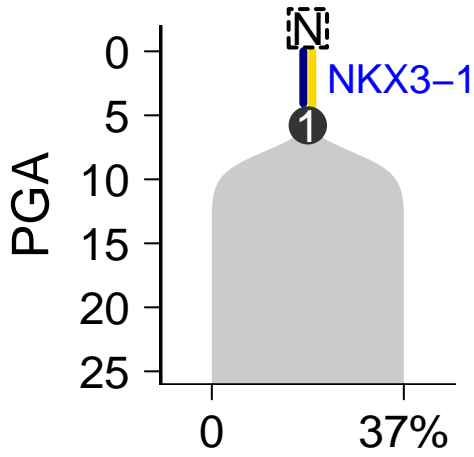

## SomaticSniper–TITAN

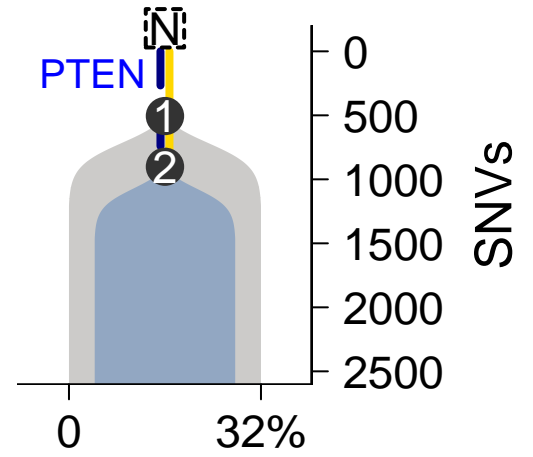

## MuTect–Battenberg

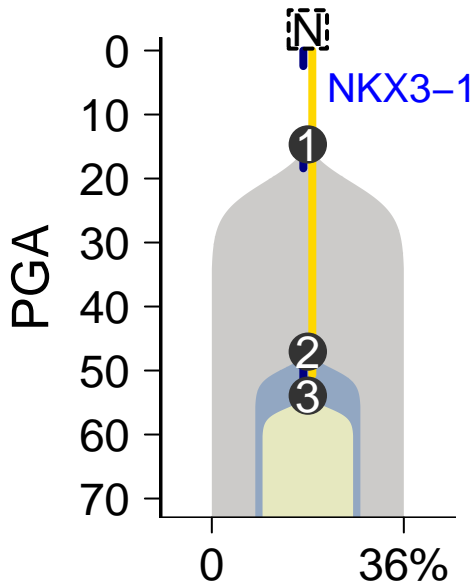

## MuTect–TITAN

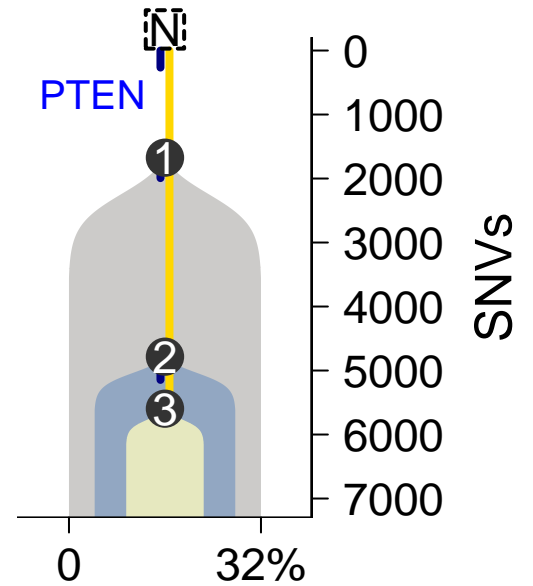

# CPCG0019

## SomaticSniper–Battenberg

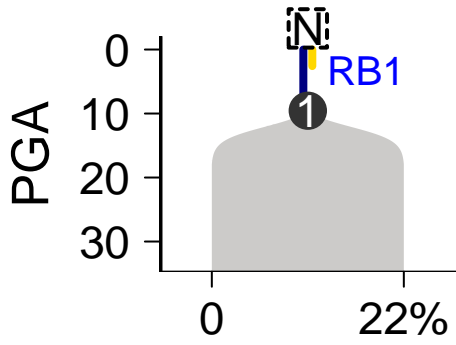

## SomaticSniper–TITAN

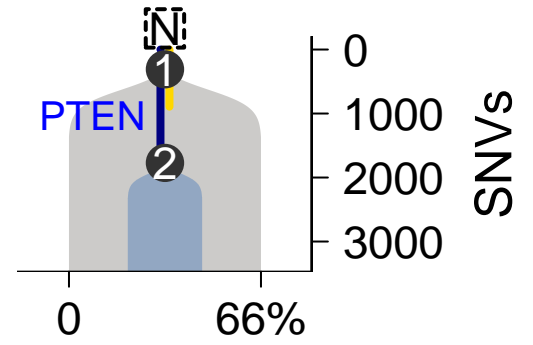

## MuTect–Battenberg

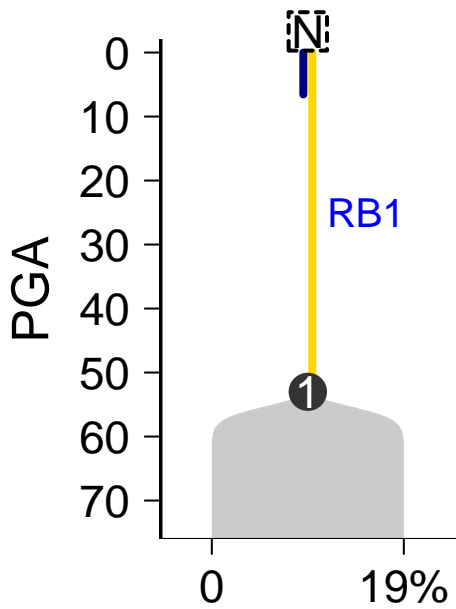

## MuTect–TITAN

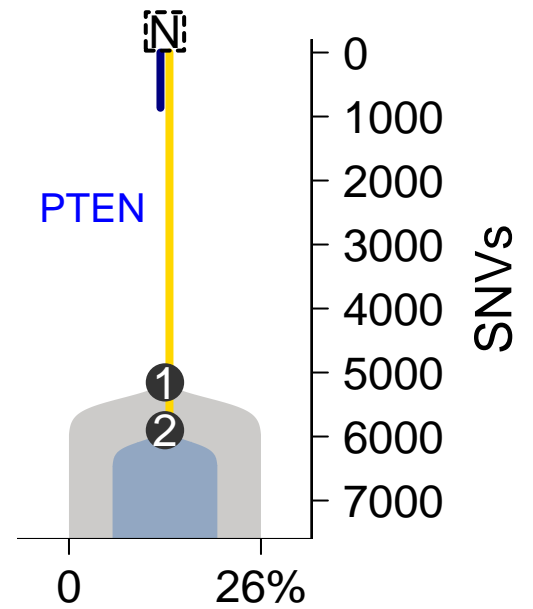

# CPCG0020

## SomaticSniper-Battenberg

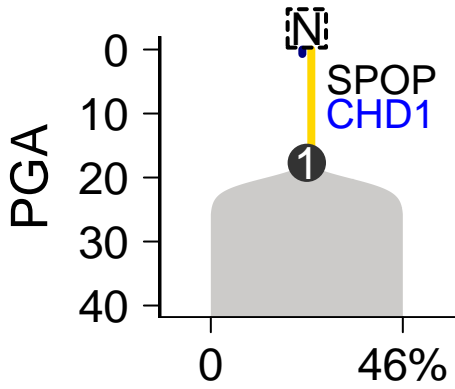

## SomaticSniper-TITAN

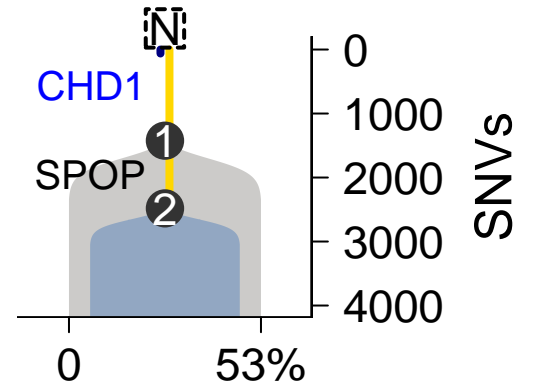

## MuTect-Battenberg

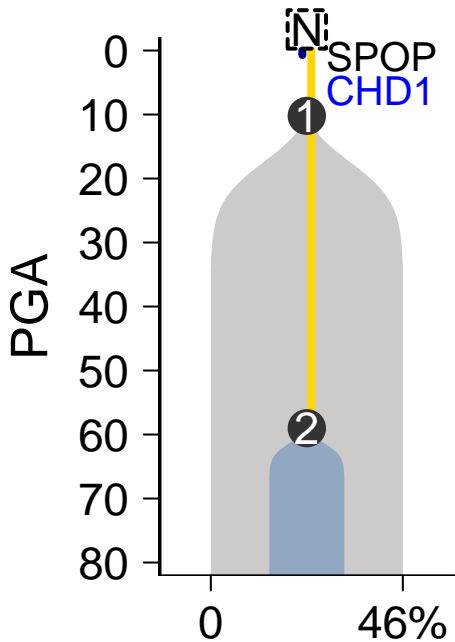

## MuTect-TITAN

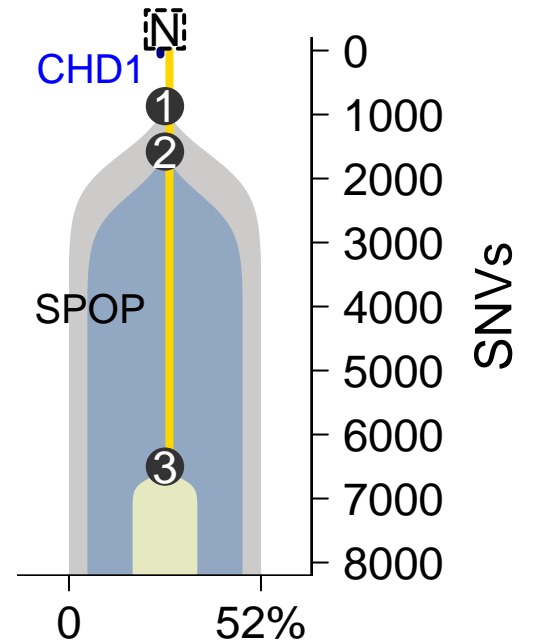

# CPCG0022

## SomaticSniper–Battenberg

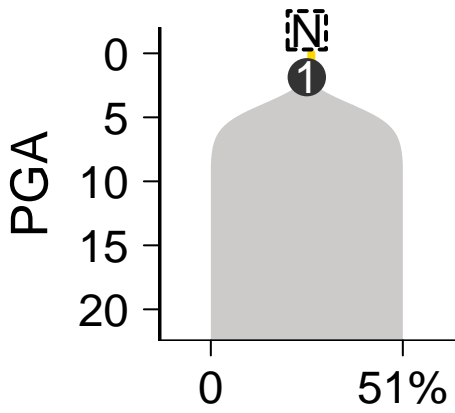

## SomaticSniper–TITAN

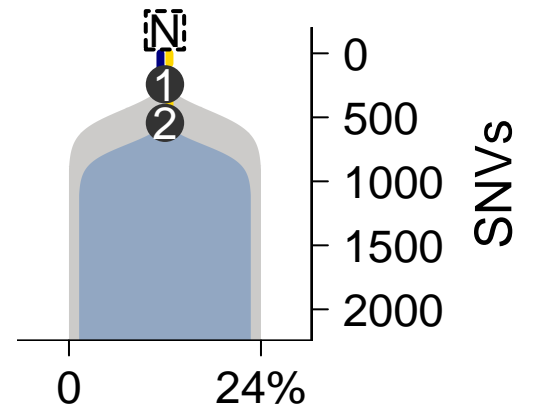

## MuTect–Battenberg

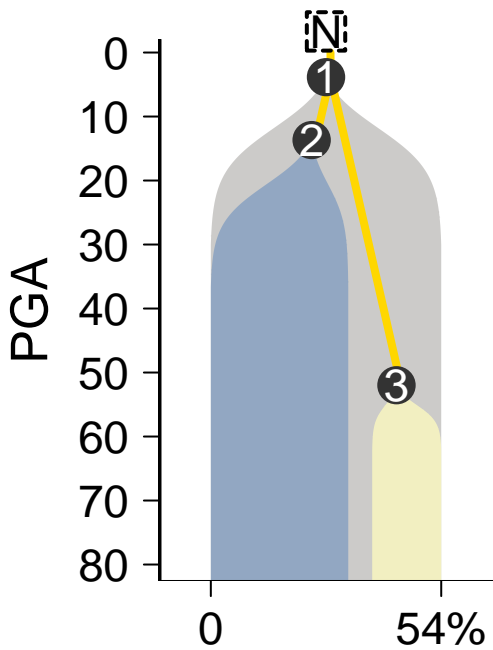

## MuTect–TITAN

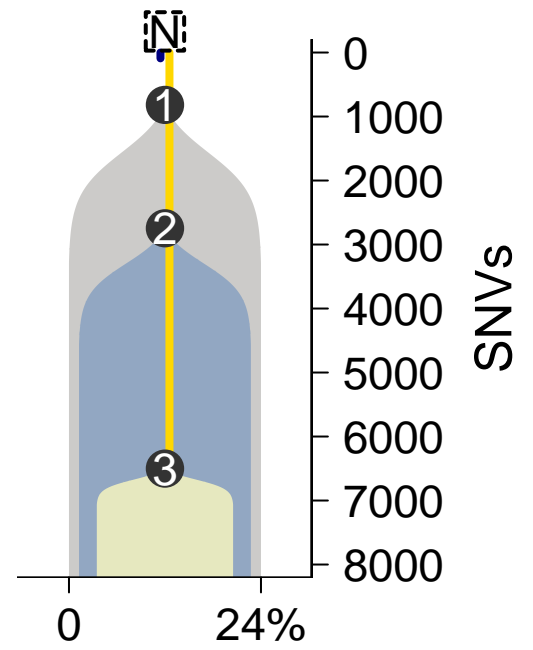

# CPCG0027

## SomaticSniper-Battenberg

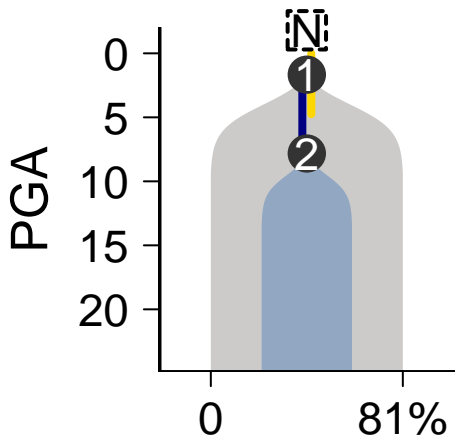

## SomaticSniper-TITAN

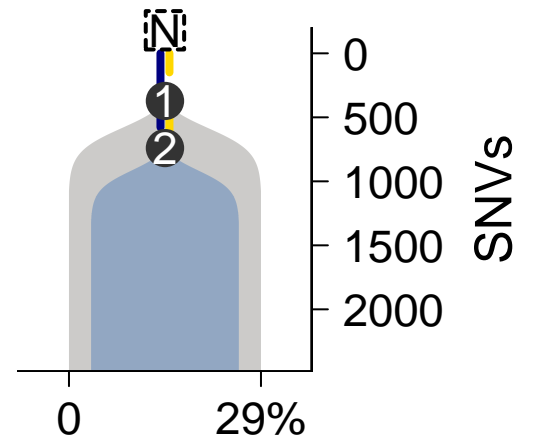

## MuTect-Battenberg

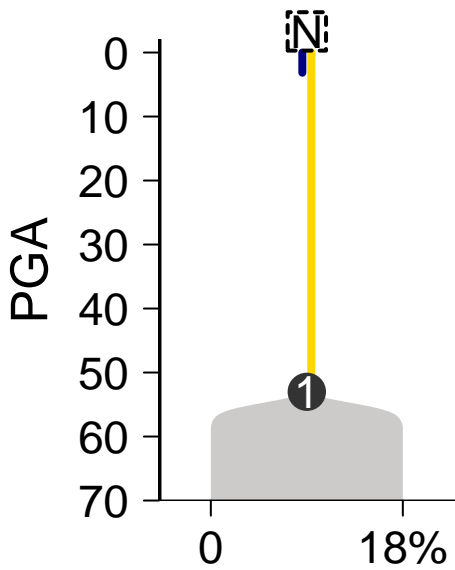

## MuTect-TITAN

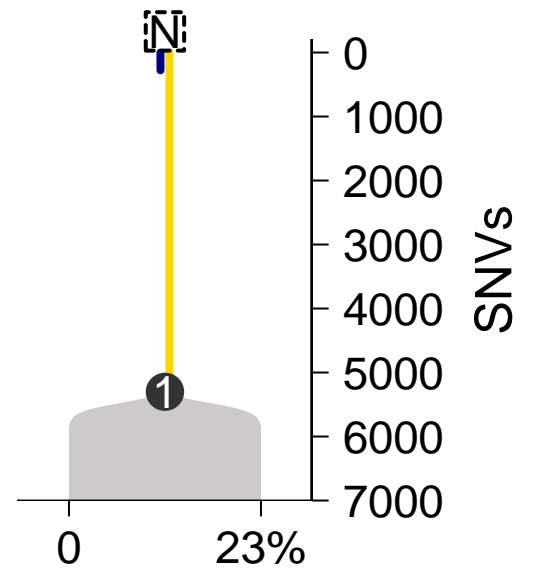

# CPCG0030

## SomaticSniper-Battenberg

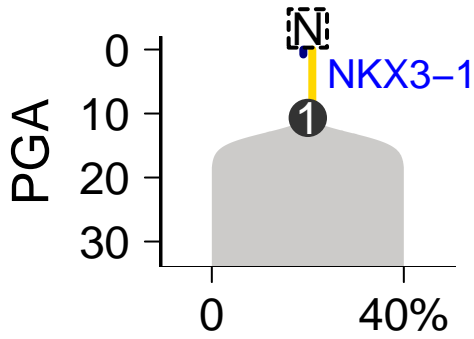

## SomaticSniper-TITAN

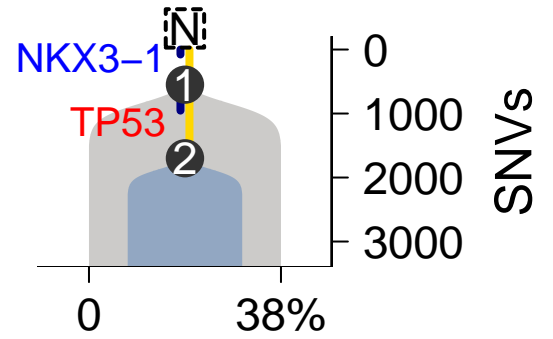

## MuTect-Battenberg

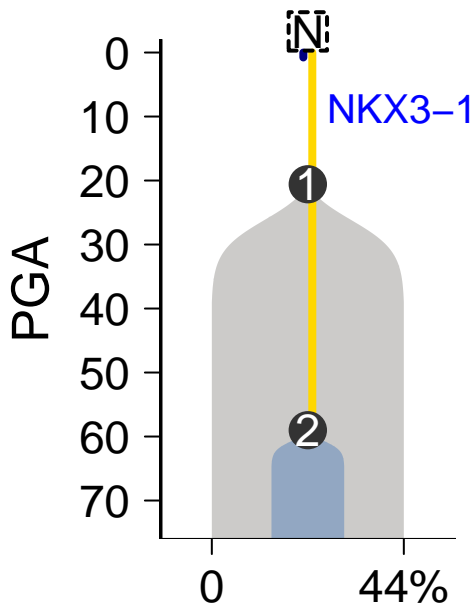

## MuTect-TITAN

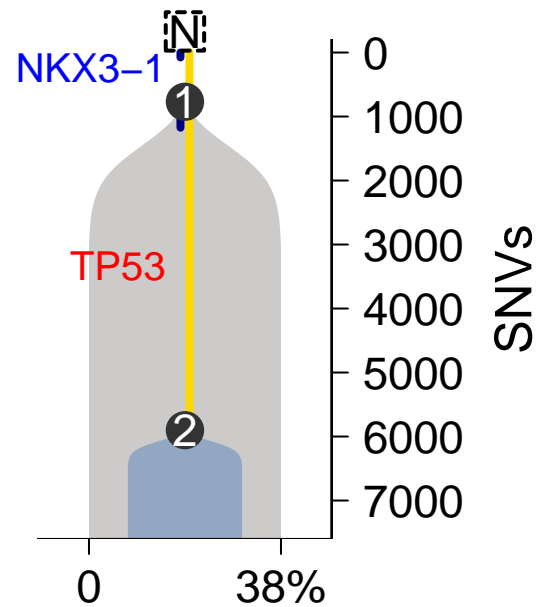

# CPCG0040

## SomaticSniper-Battenberg

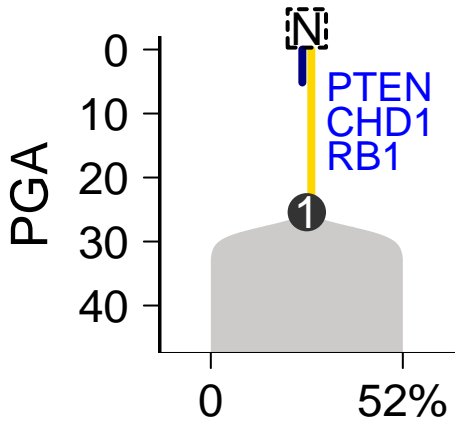

## SomaticSniper-TITAN

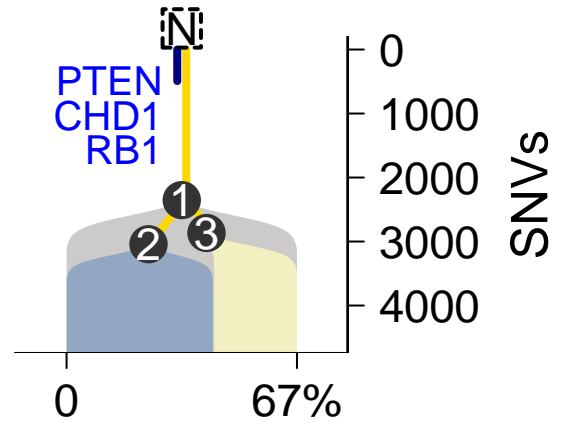

## MuTect-Battenberg

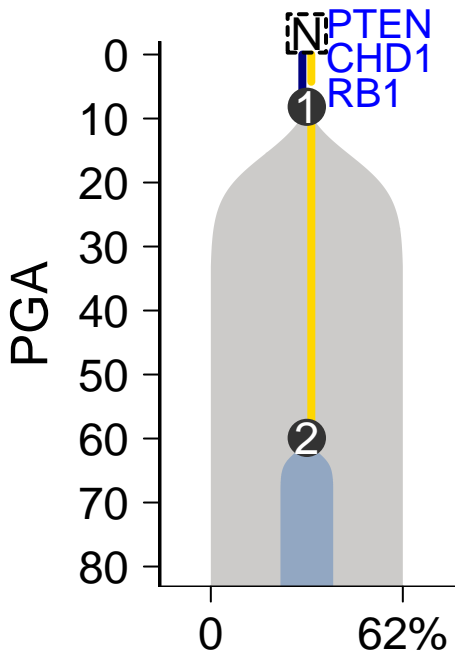

## MuTect-TITAN

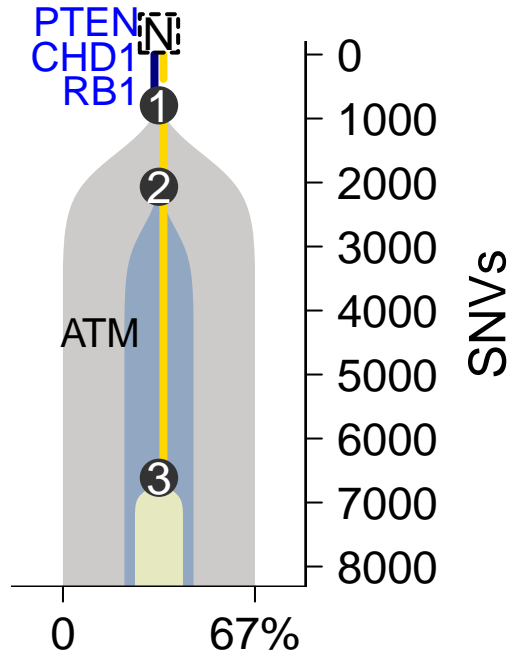



# CPCG0046

## SomaticSniper-Battenberg

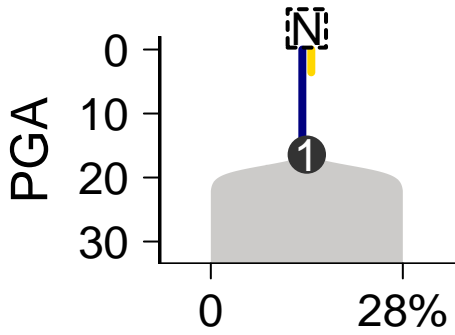

## SomaticSniper-TITAN

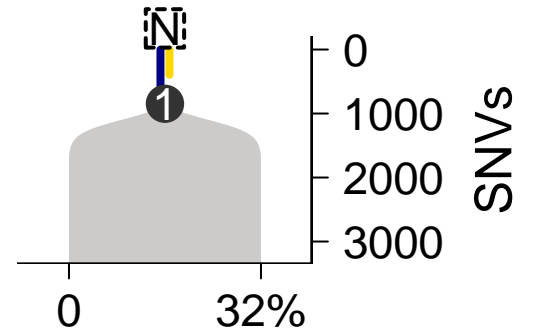

## MuTect-Battenberg

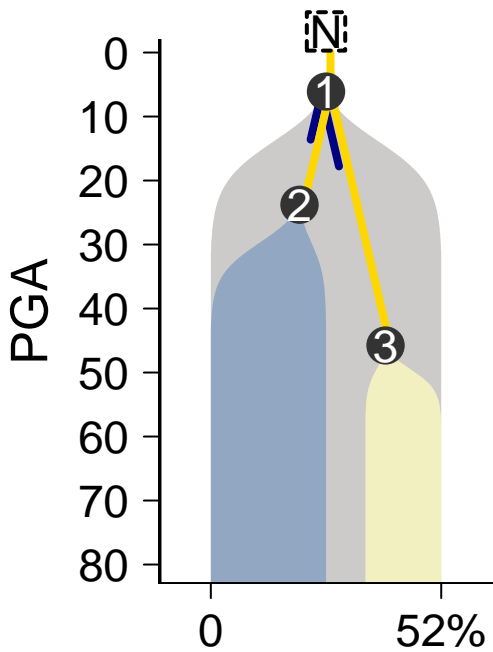

## MuTect-TITAN

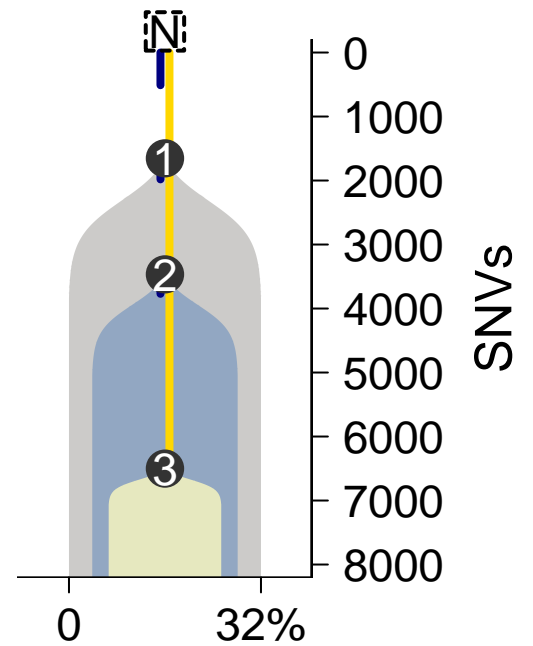

# CPCG0047

## SomaticSniper-Battenberg

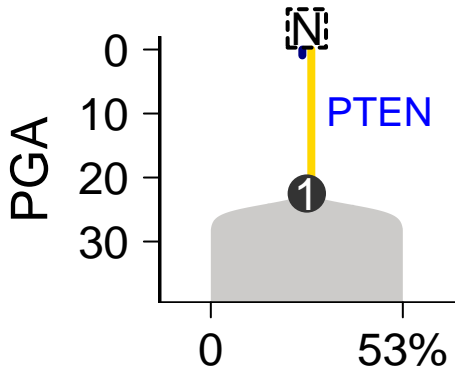

## SomaticSniper-TITAN

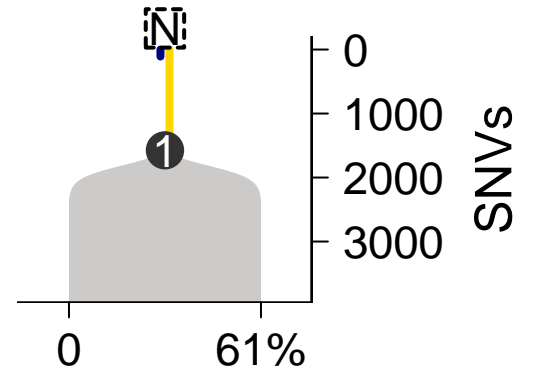

## MuTect-Battenberg

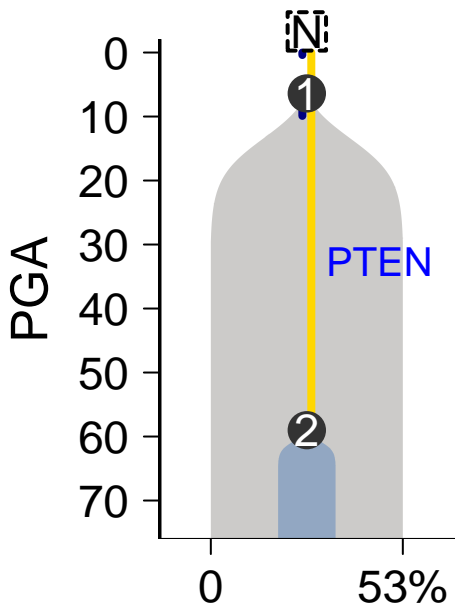

## MuTect-TITAN

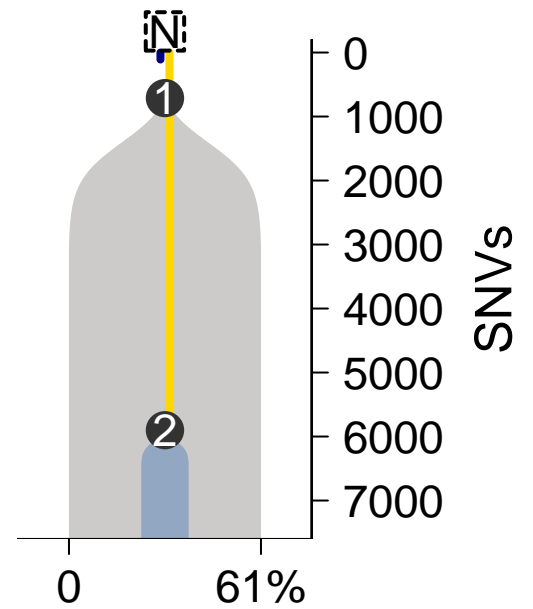

# CPCG0048

## SomaticSniper-Battenberg

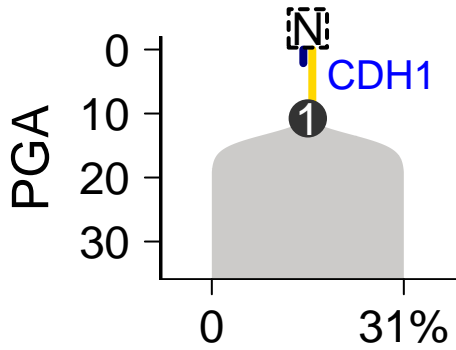

## SomaticSniper-TITAN

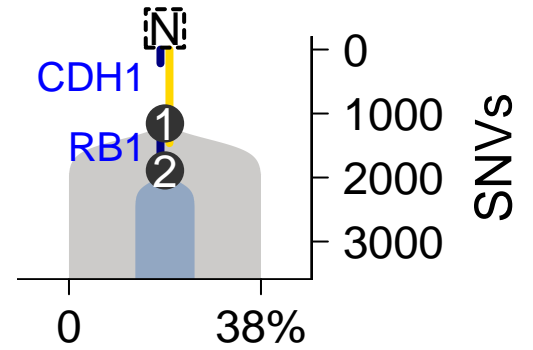

## MuTect-Battenberg

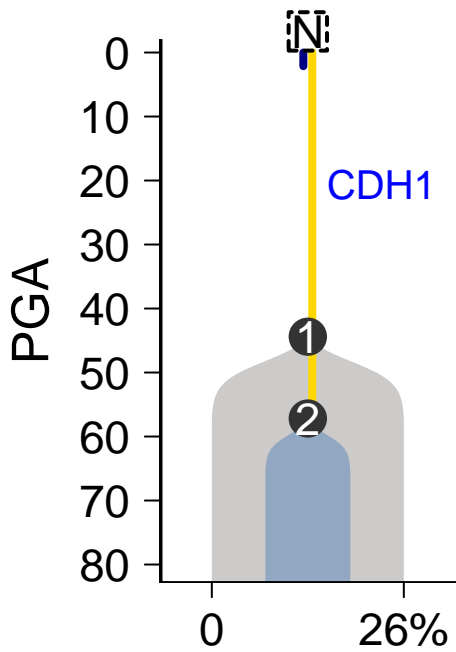

## MuTect-TITAN

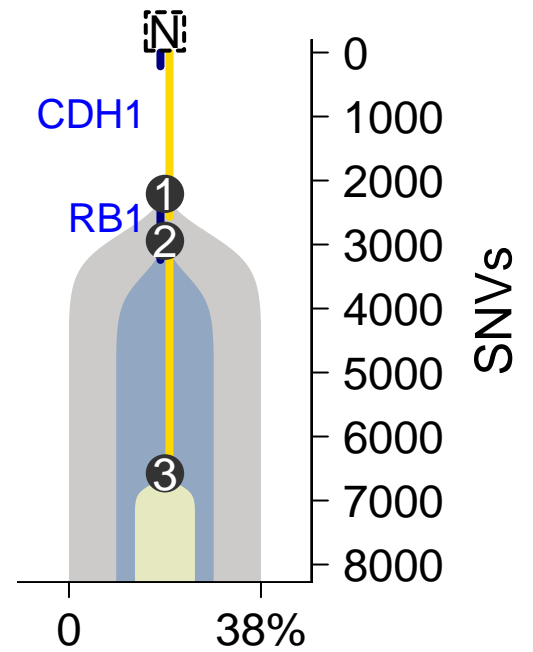

# CPCG0050

## SomaticSniper-Battenberg

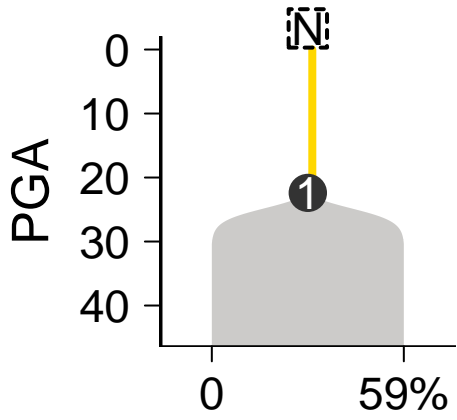

## SomaticSniper-TITAN

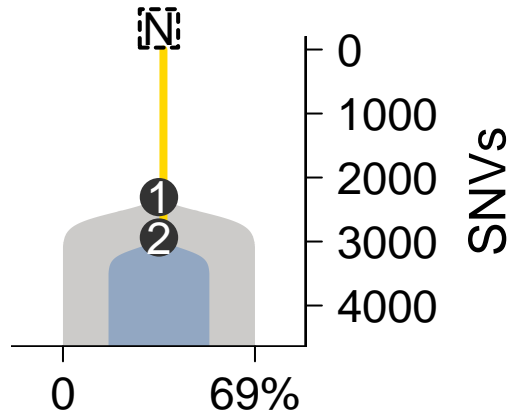

# CPCG0057

## SomaticSniper-Battenberg

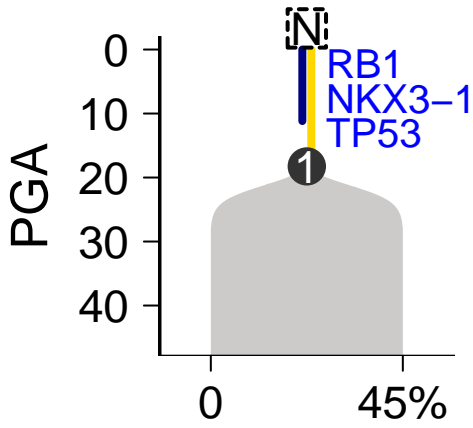

## SomaticSniper-TITAN

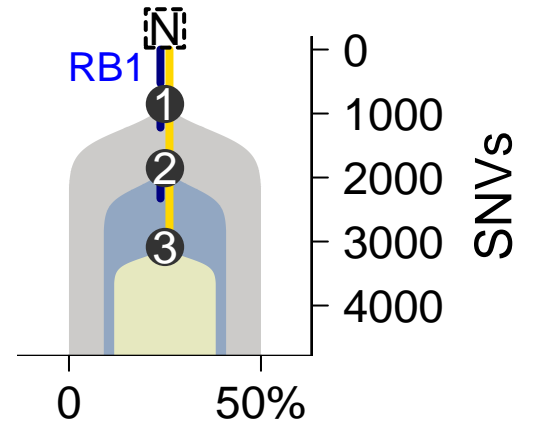

## MuTect-Battenberg

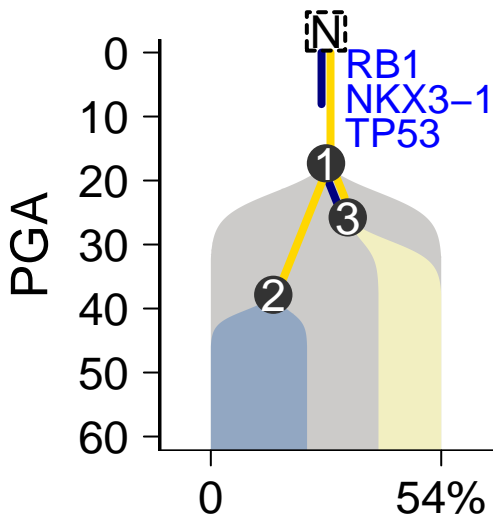

## MuTect-TITAN

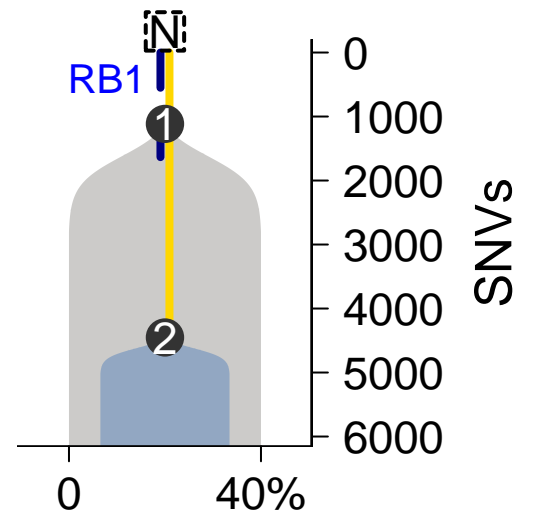

# CPCG0063

## SomaticSniper-Battenberg

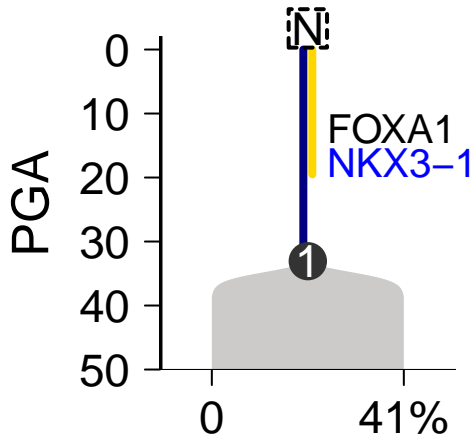

## SomaticSniper-TITAN

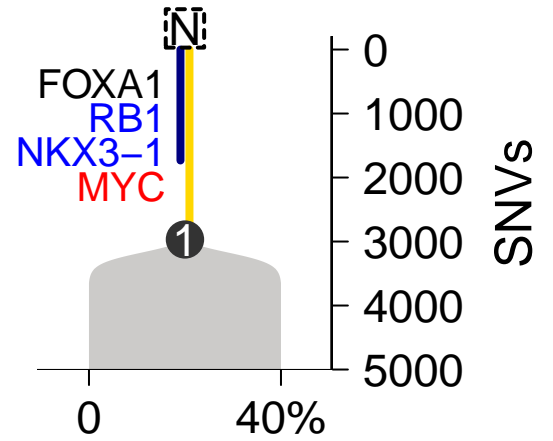

## MuTect-Battenberg

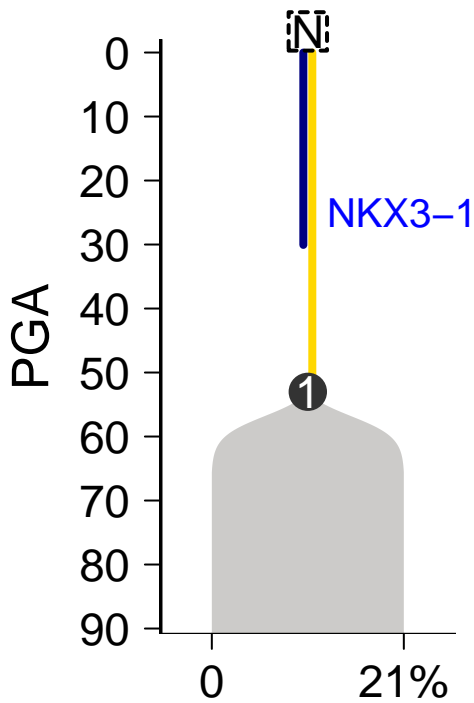

## MuTect-TITAN

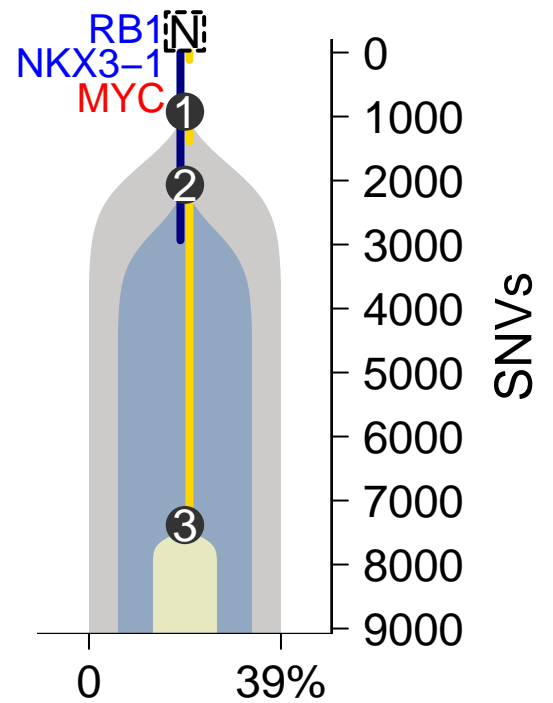

# CPCG0072

## SomaticSniper-Battenberg

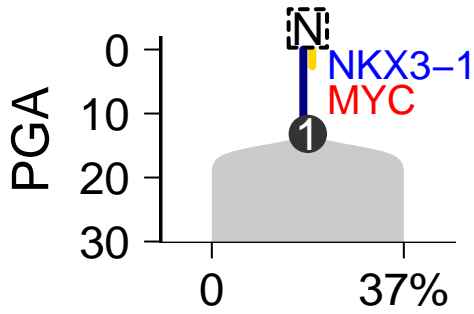

## SomaticSniper-TITAN

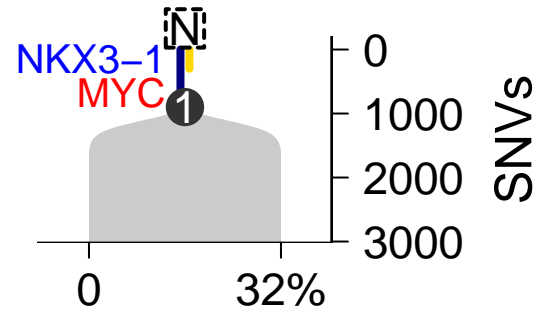

## MuTect-Battenberg

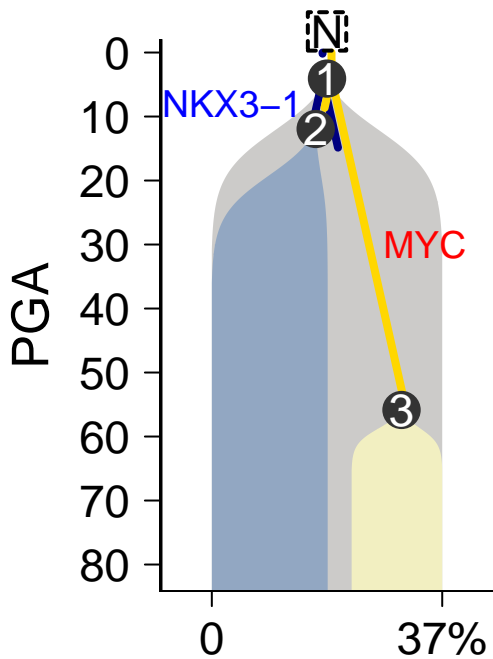

## MuTect-TITAN

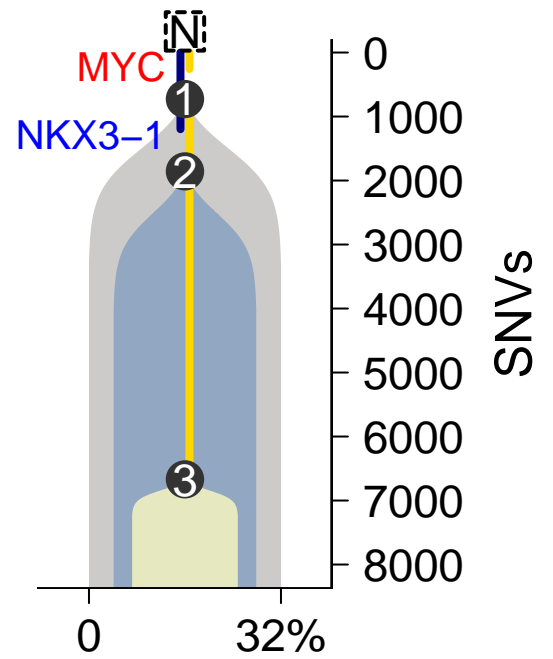

# CPCG0073

## SomaticSniper-Battenberg

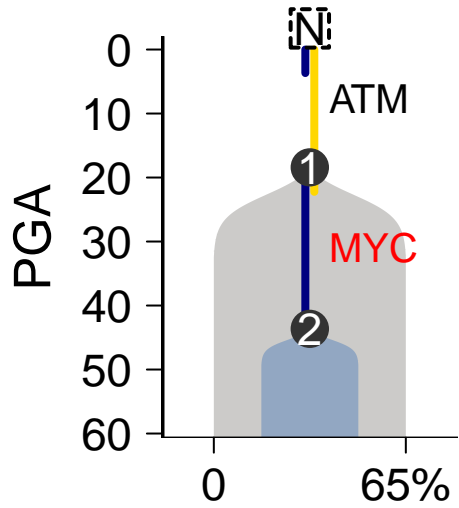

## SomaticSniper-TITAN

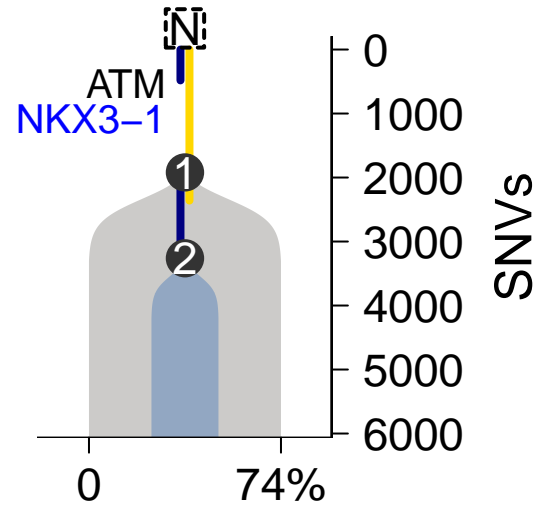

## MuTect-Battenberg

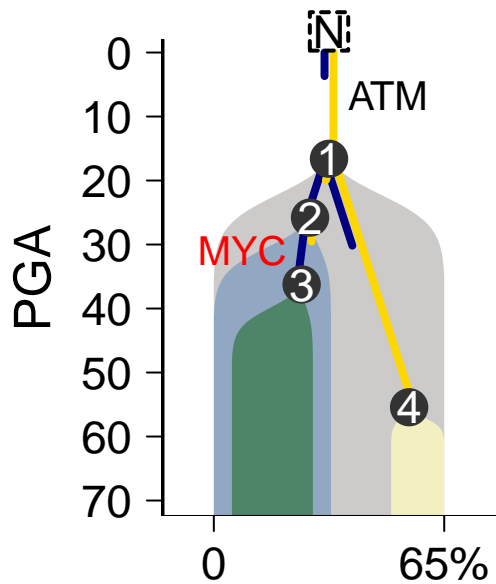

## MuTect-TITAN

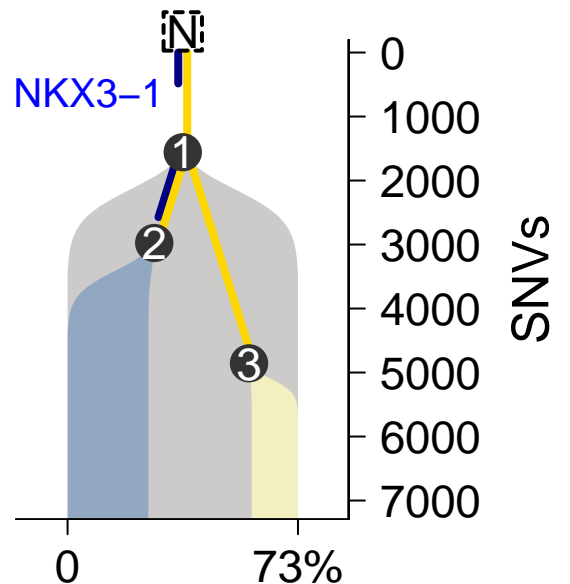



# CPCG0074

SomaticSniper-Battenberg

SomaticSniper-TITAN

Poly-tumour

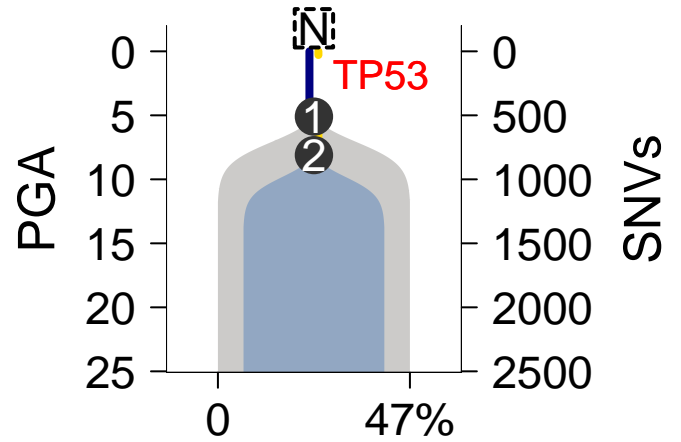

MuTect-Battenberg

MuTect-TITAN

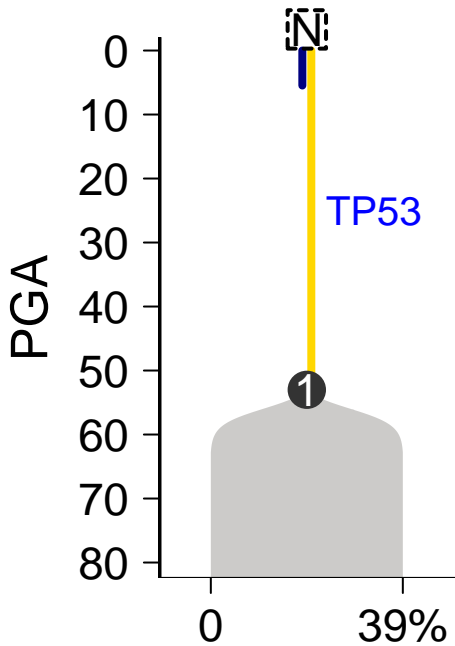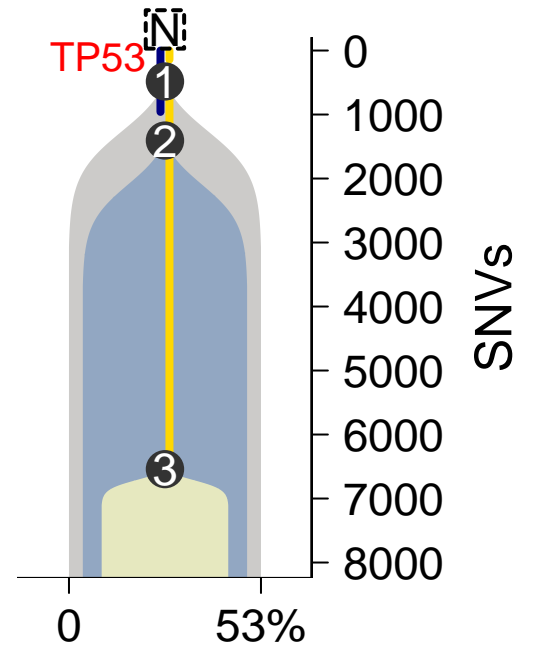

# CPCG0075

## SomaticSniper–Battenberg

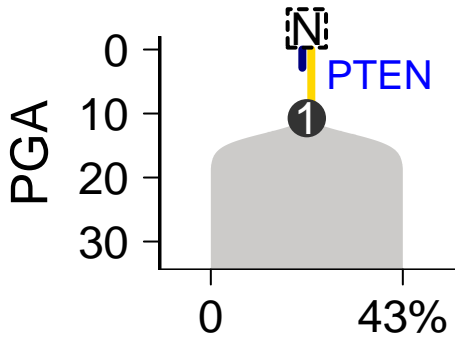

## SomaticSniper–TITAN

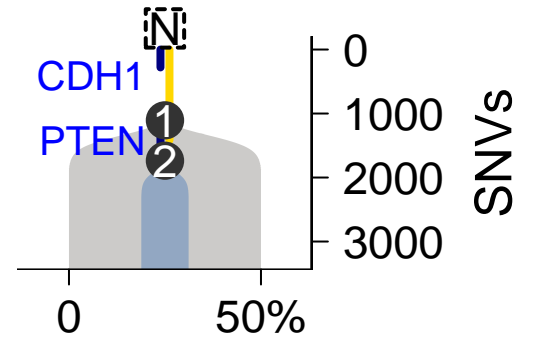

## MuTect–Battenberg

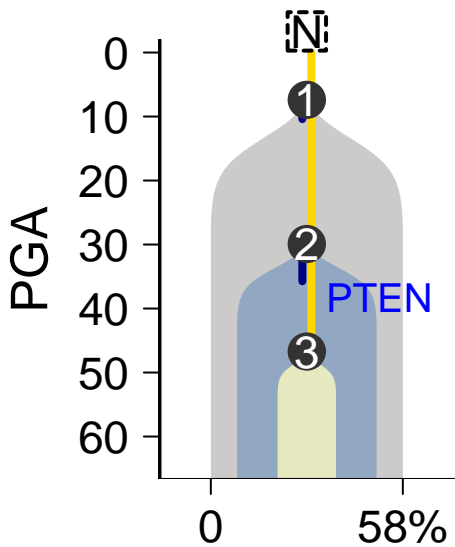

## MuTect–TITAN

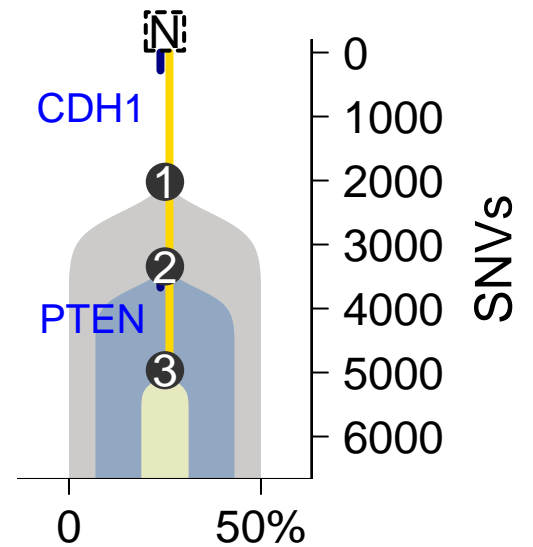

# CPCG0078

## SomaticSniper–Battenberg

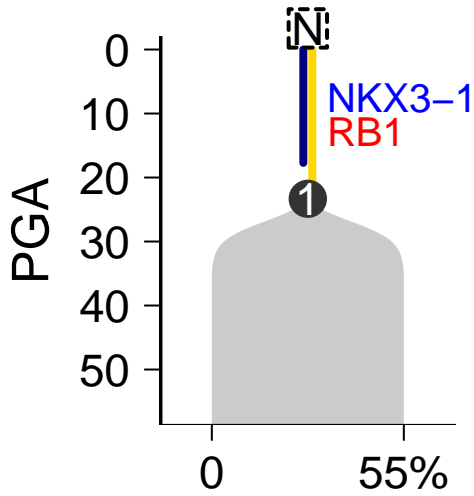

## SomaticSniper–TITAN

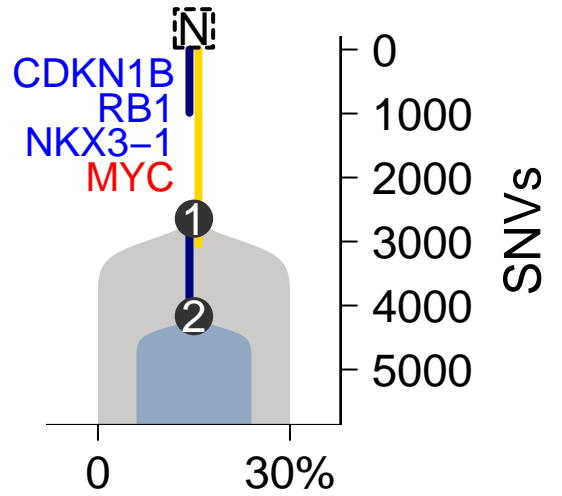

## MuTect–Battenberg

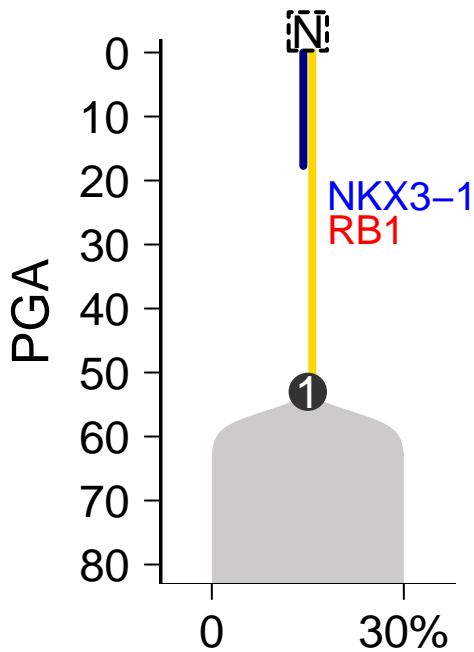

## MuTect–TITAN

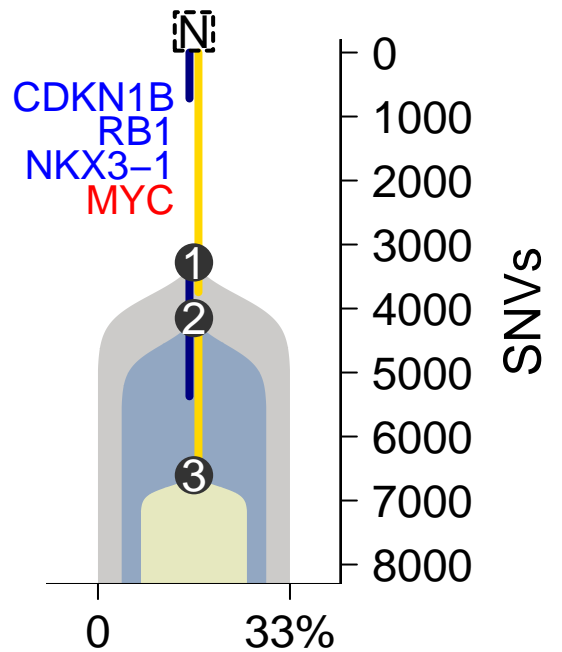

# CPCG0081

## SomaticSniper-Battenberg

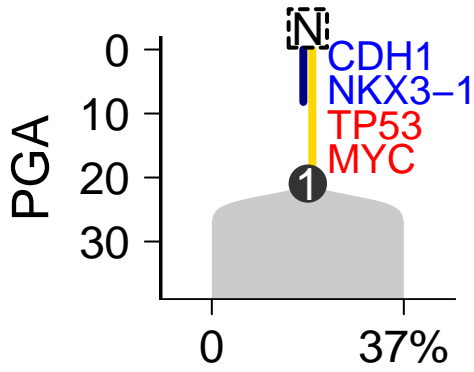

## SomaticSniper-TITAN

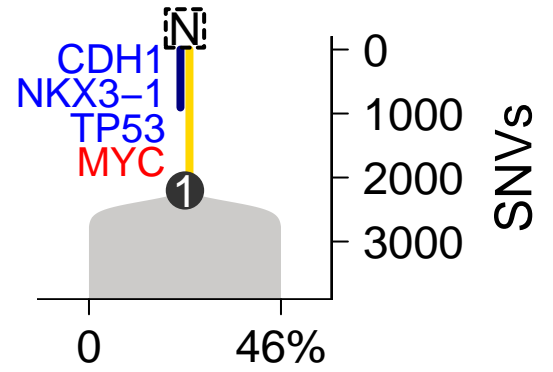

## MuTect-Battenberg

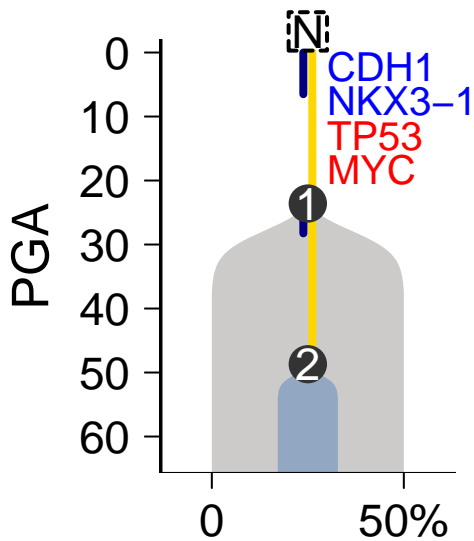

## MuTect-TITAN

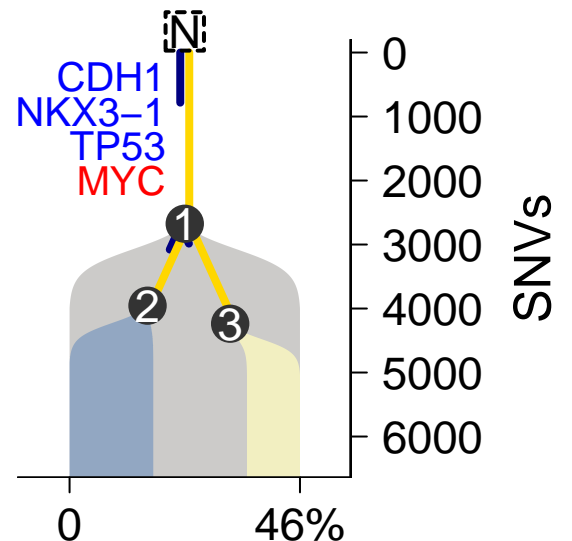

# CPCG0083

## SomaticSniper–Battenberg

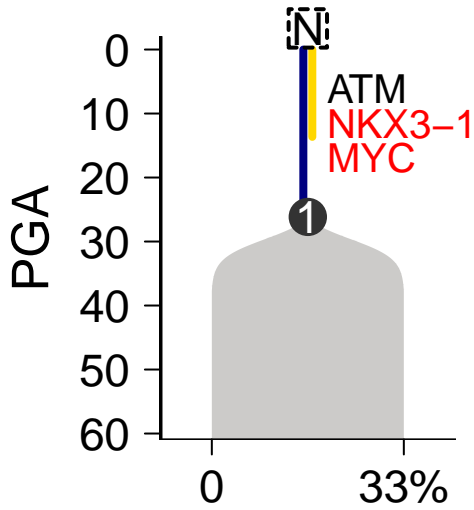

## SomaticSniper–TITAN

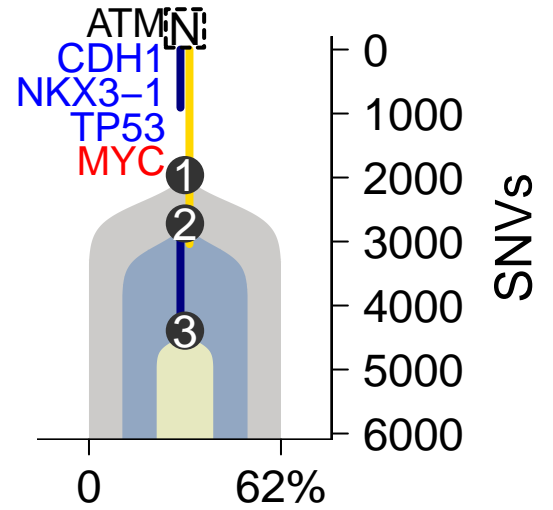

## MuTect–Battenberg

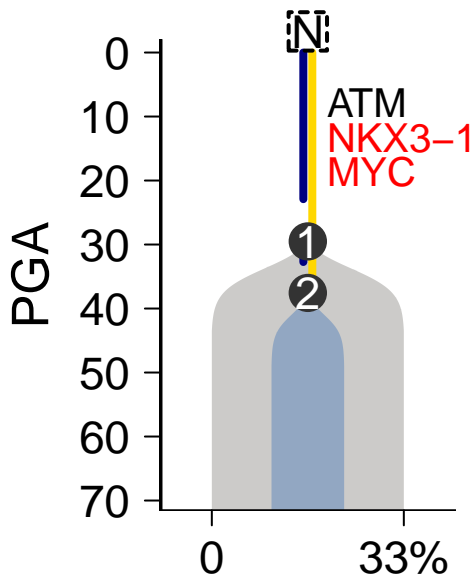

## MuTect–TITAN

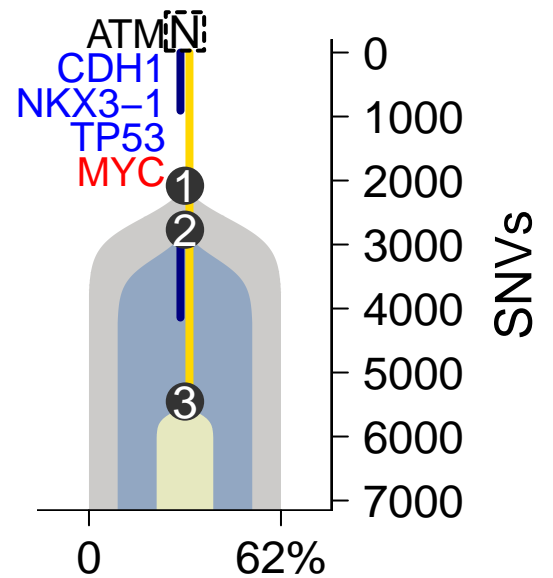

# CPCG0084

## SomaticSniper–Battenberg

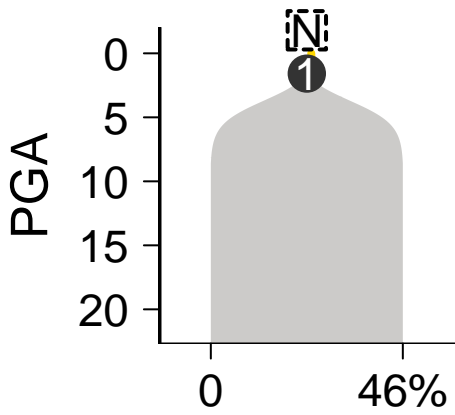

## SomaticSniper–TITAN

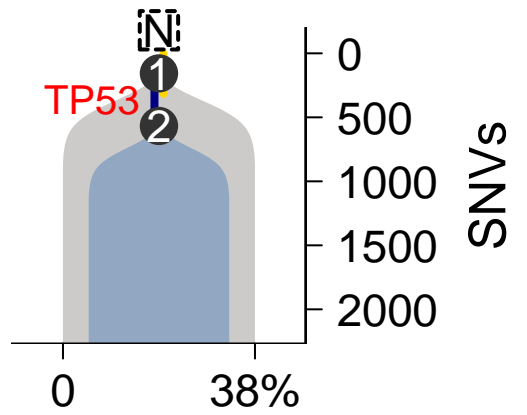

## MuTect–Battenberg

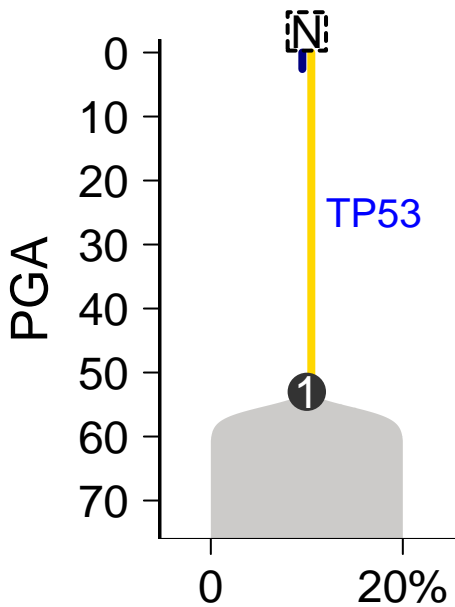

## MuTect–TITAN

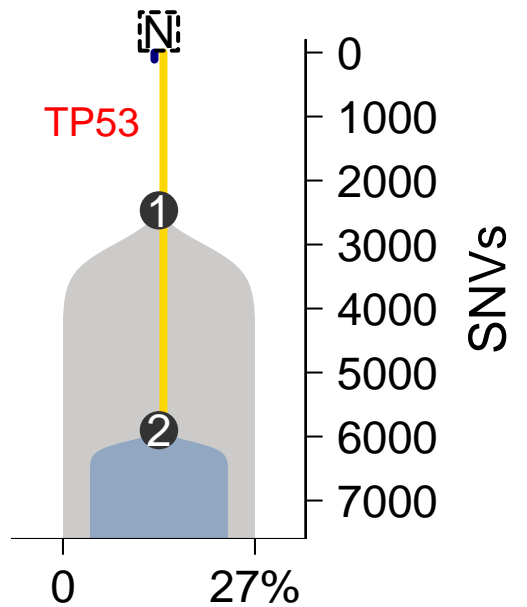

# CPCG0087

## SomaticSniper-Battenberg

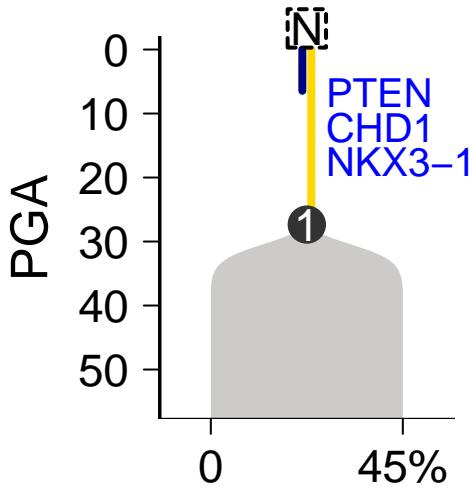

## SomaticSniper-TITAN

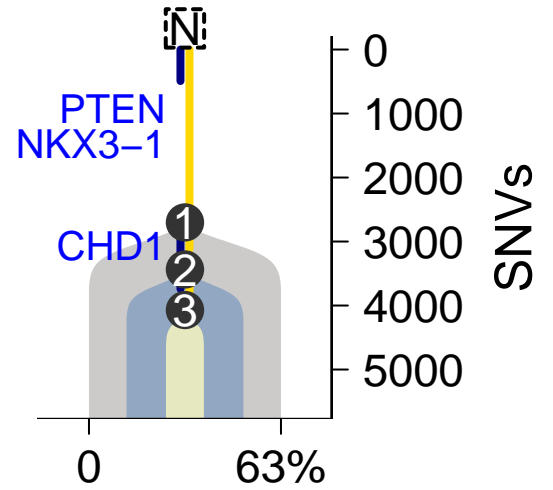

## MuTect-Battenberg

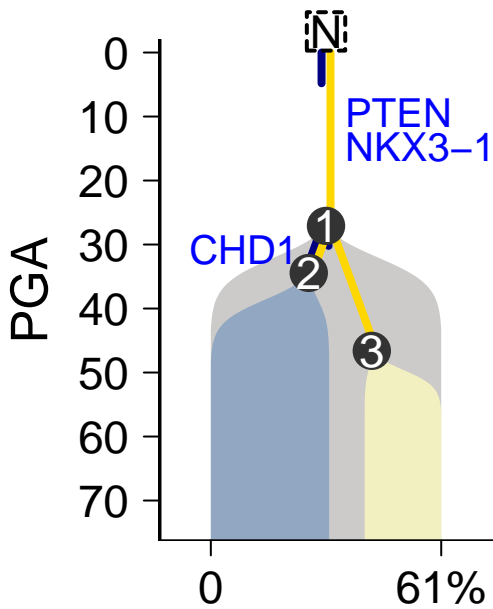

## MuTect-TITAN

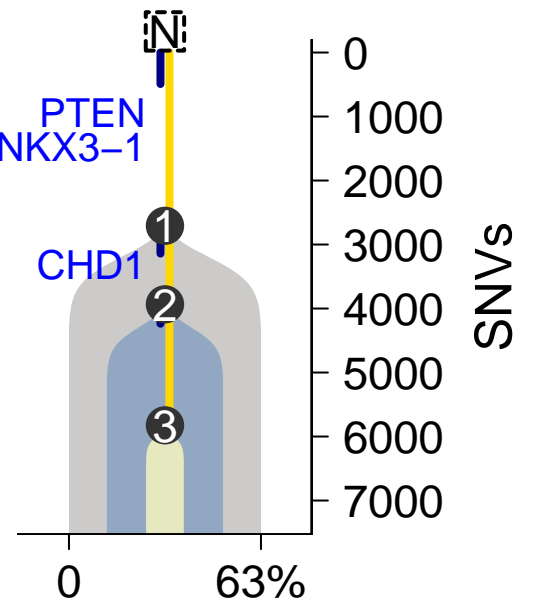

# CPCG0089

## SomaticSniper-Battenberg

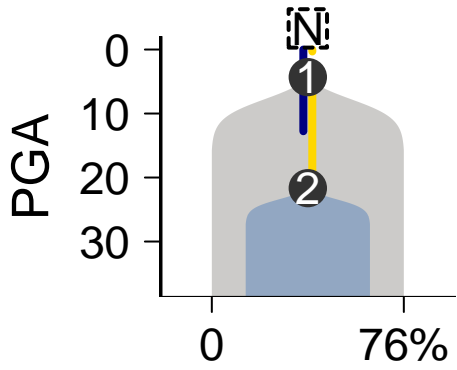

## SomaticSniper-TITAN

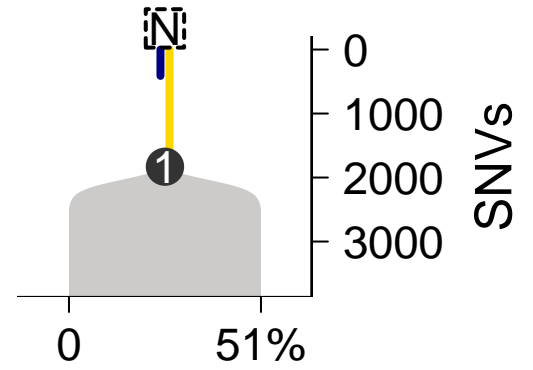

## MuTect-TITAN

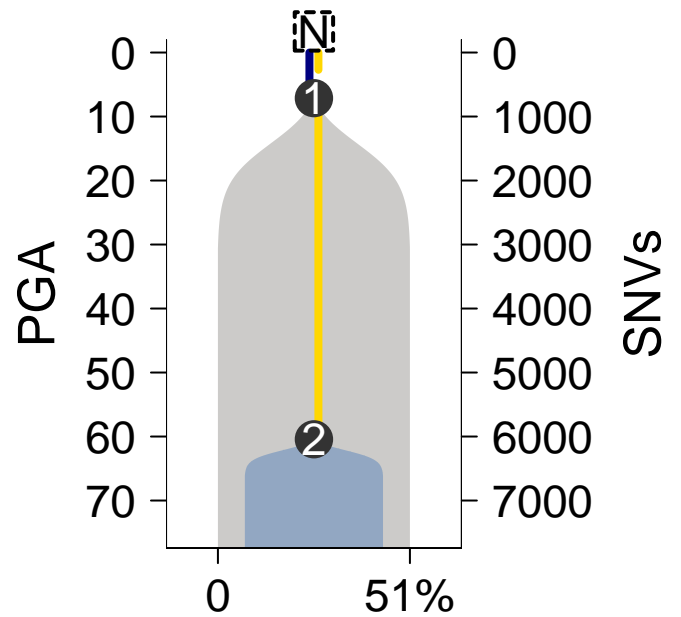



# CPCG0090

## SomaticSniper-Battenberg

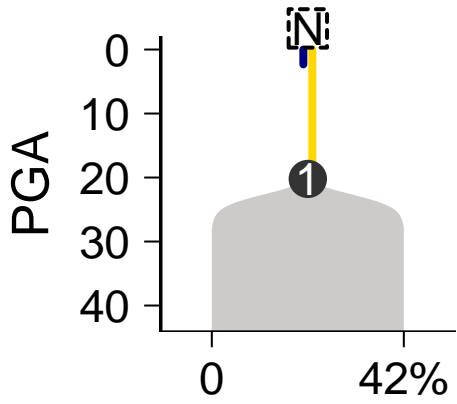

## SomaticSniper-TITAN

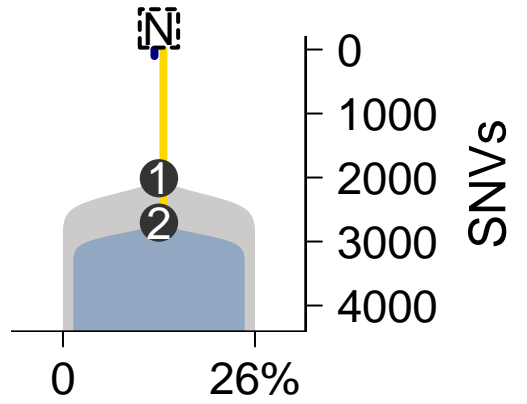

# CPCG0094

## SomaticSniper-Battenberg

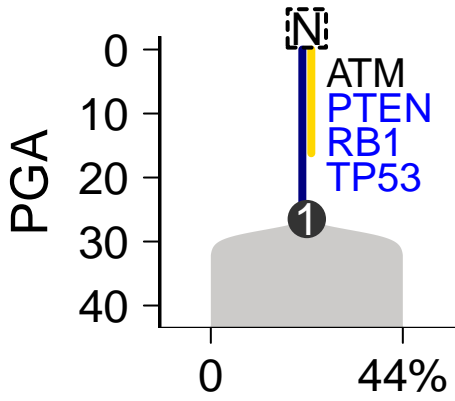

## SomaticSniper-TITAN

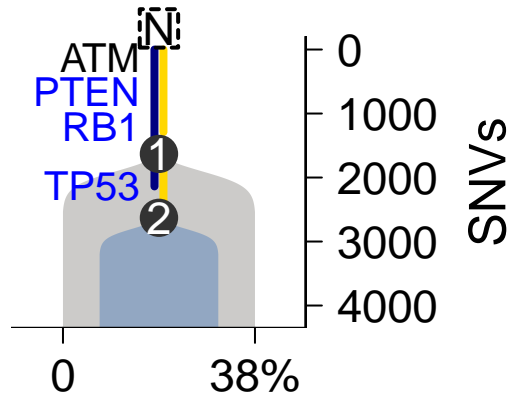

## MuTect-Battenberg

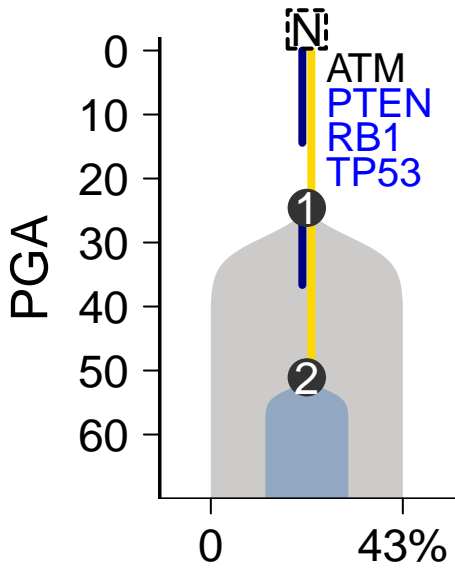

## MuTect-TITAN

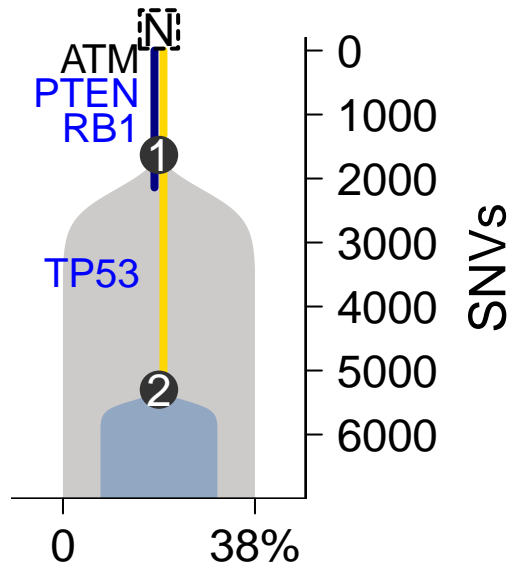

# CPCG0095

## SomaticSniper-Battenberg

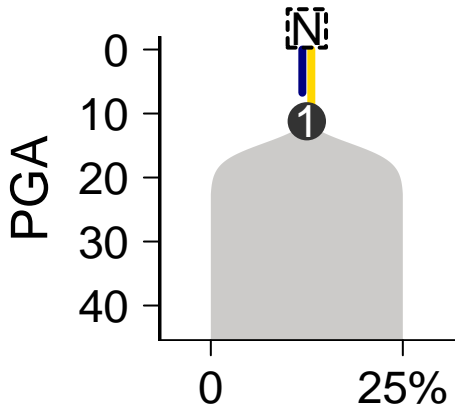

## SomaticSniper-TITAN

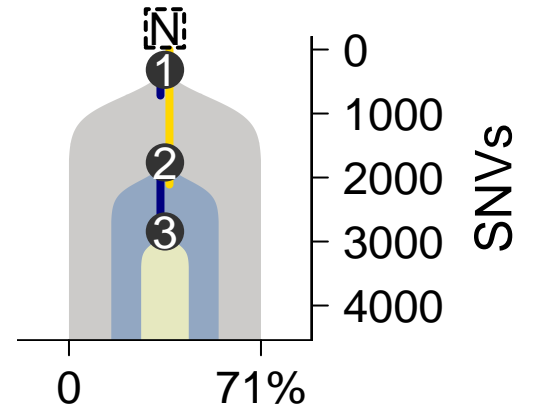

## MuTect-Battenberg

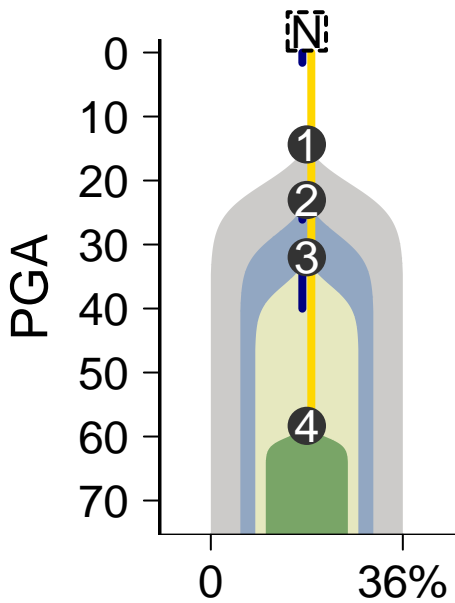

## MuTect-TITAN

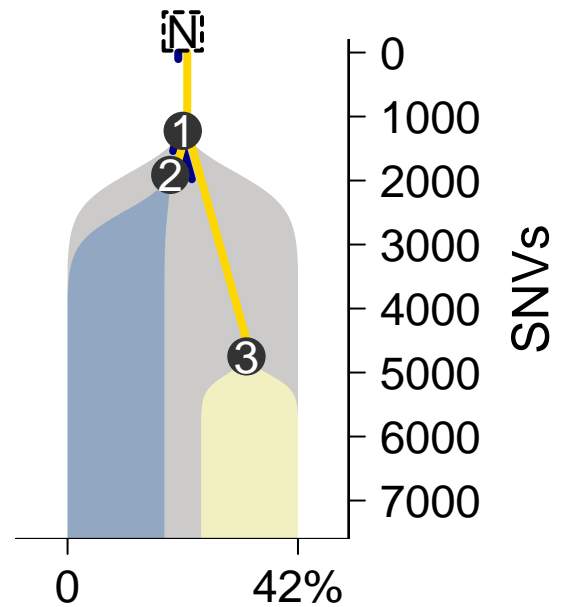

# CPCG0098

## SomaticSniper–Battenberg

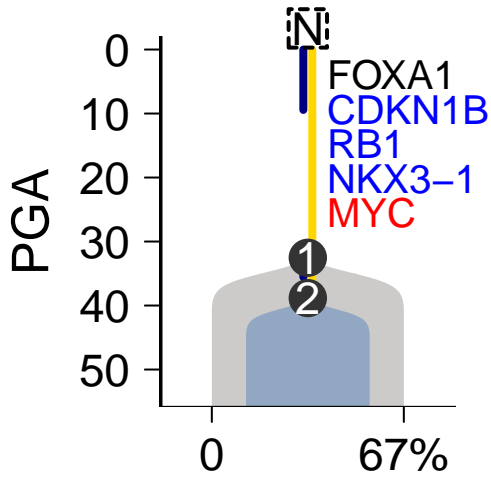

## SomaticSniper–TITAN

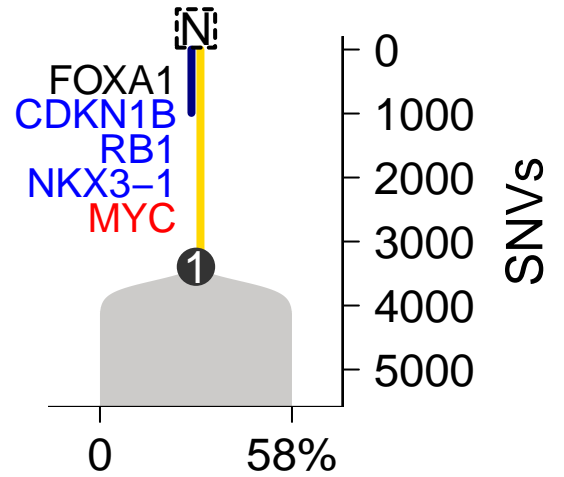

## MuTect–Battenberg

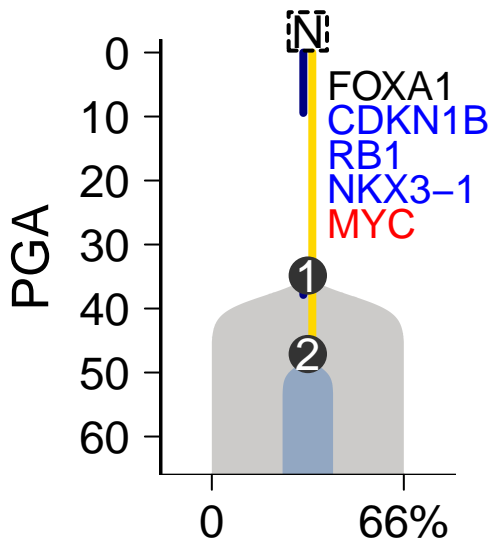

## MuTect–TITAN

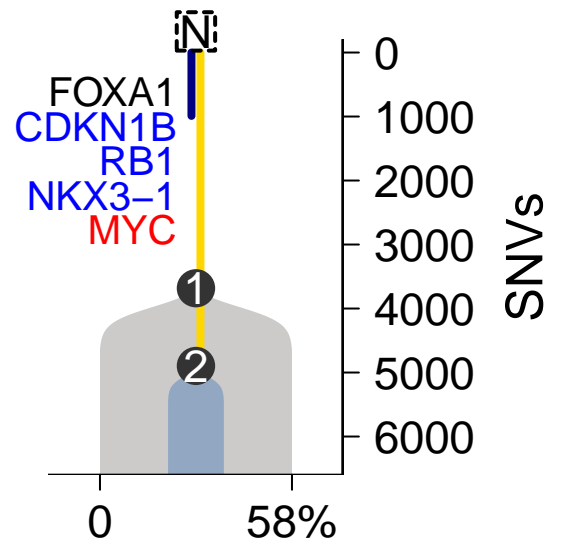

# CPCG0099

## SomaticSniper-Battenberg

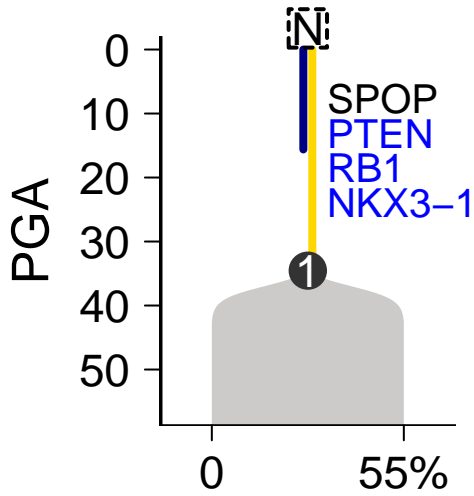

## SomaticSniper-TITAN

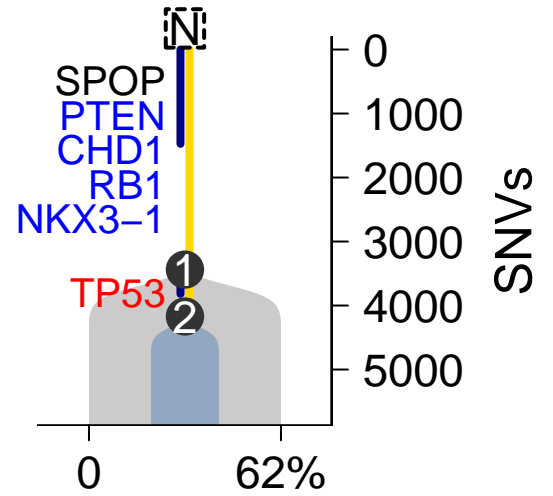

## MuTect-Battenberg

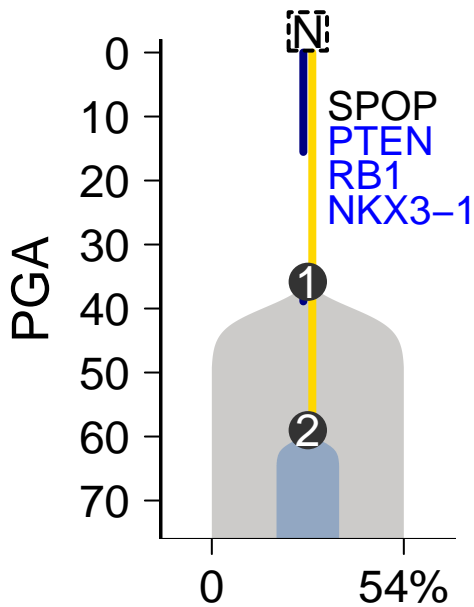

## MuTect-TITAN

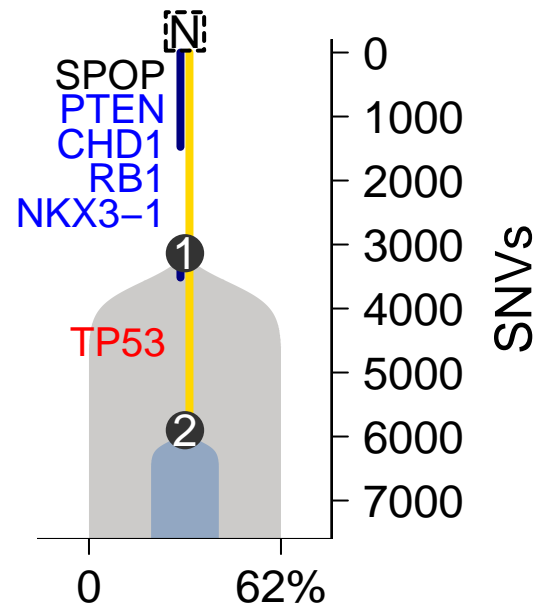

# CPCG0100

## SomaticSniper–Battenberg

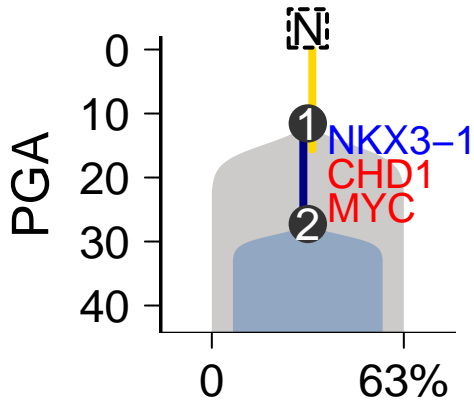

## SomaticSniper–TITAN

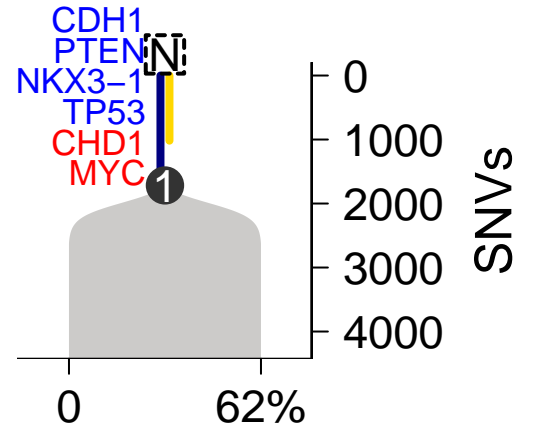

## MuTect–Battenberg

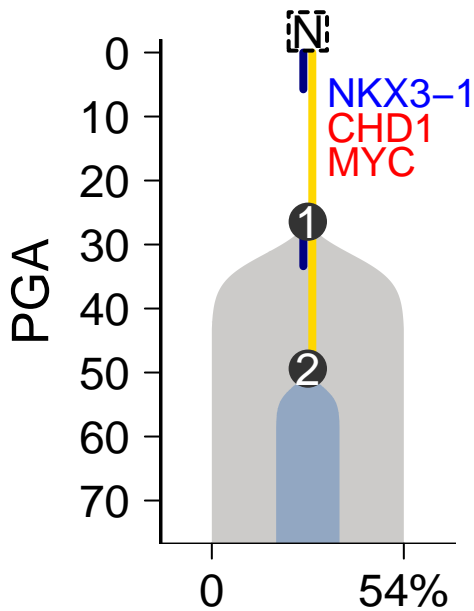

## MuTect–TITAN

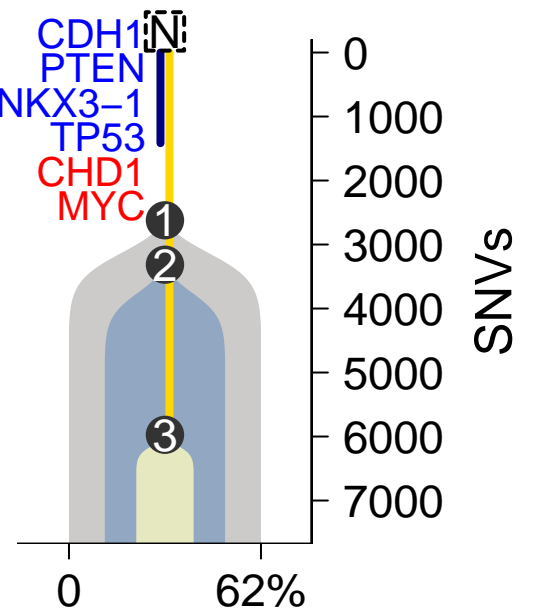

# CPCG0102

## SomaticSniper-Battenberg

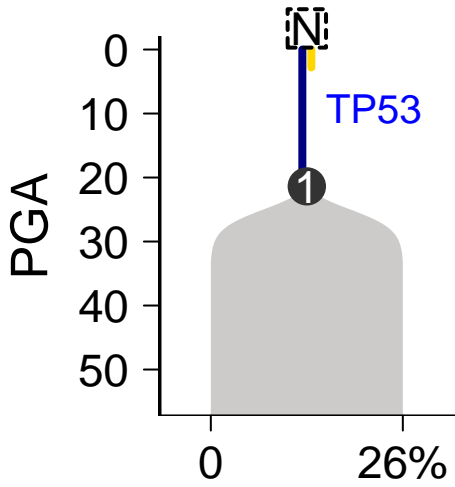

## SomaticSniper-TITAN

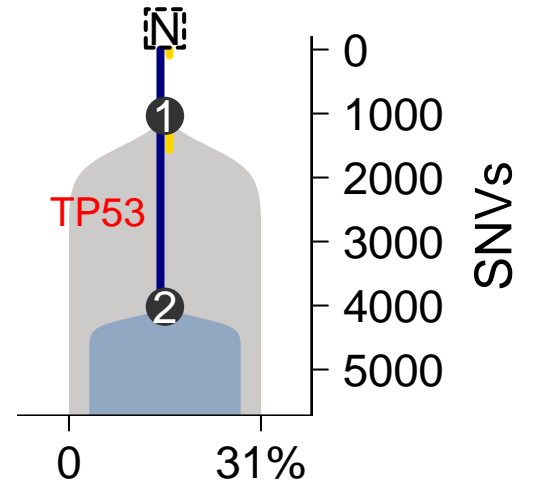

## MuTect-Battenberg

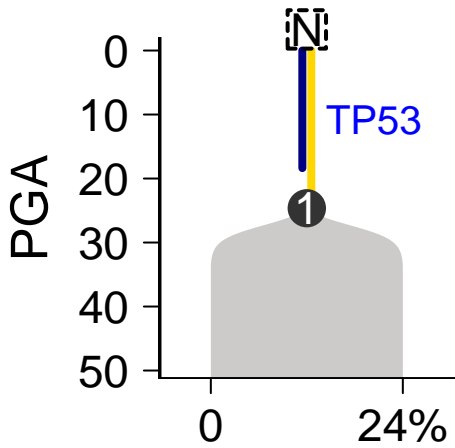

## MuTect-TITAN

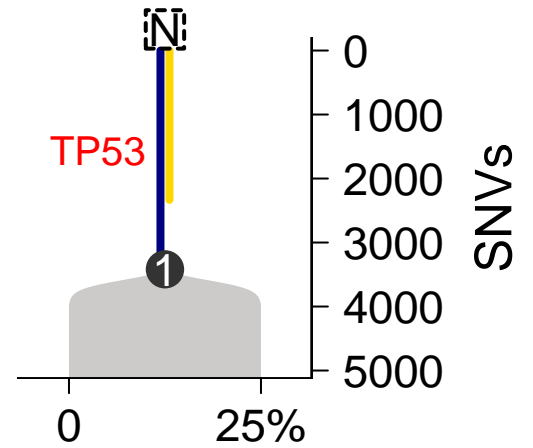

# CPCG0114

## SomaticSniper-Battenberg

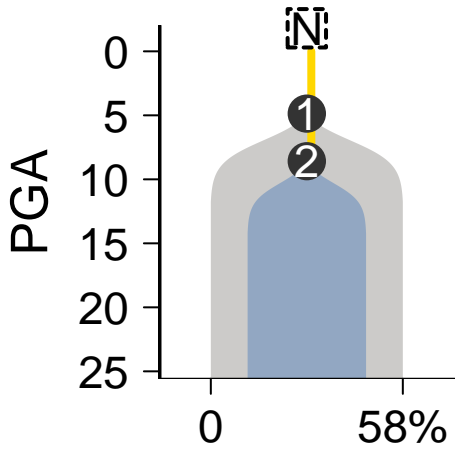

## SomaticSniper-TITAN

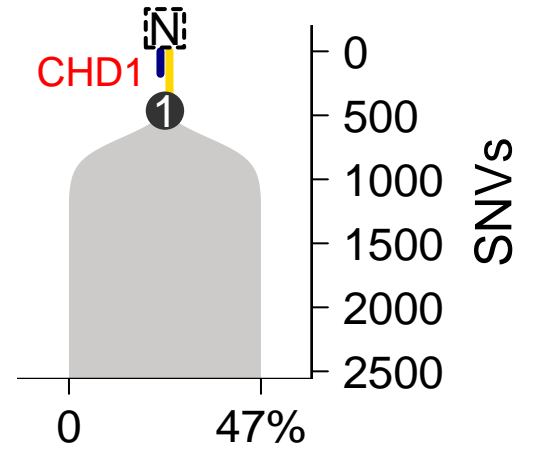

## MuTect-Battenberg

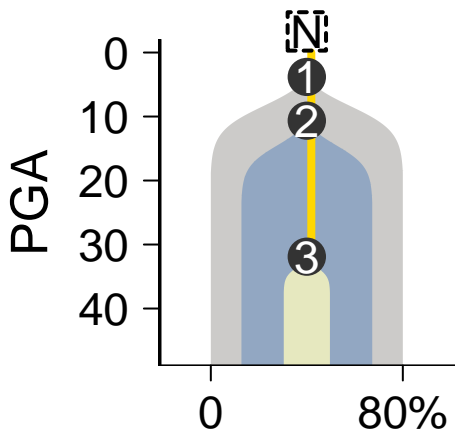

## MuTect-TITAN

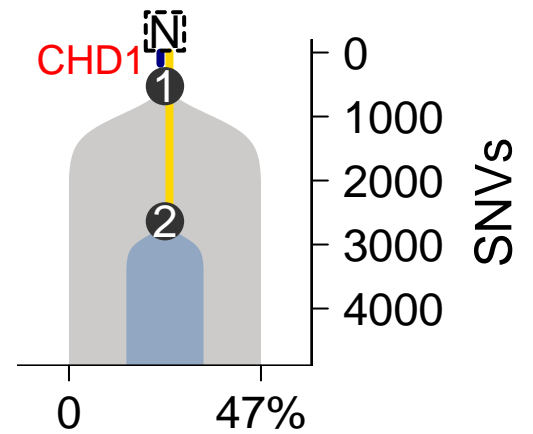



# CPCG0117

## SomaticSniper-TITAN

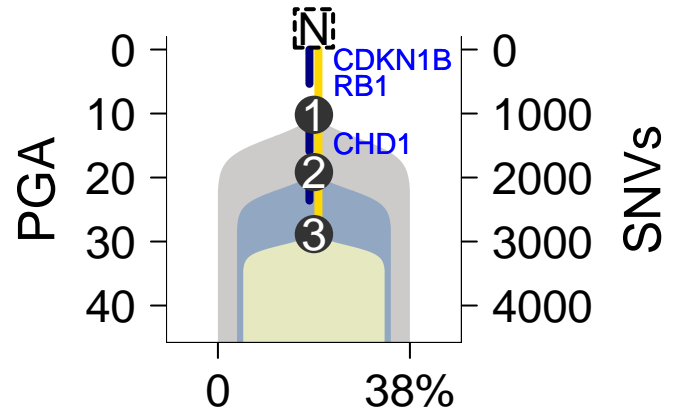

## MuTect-TITAN

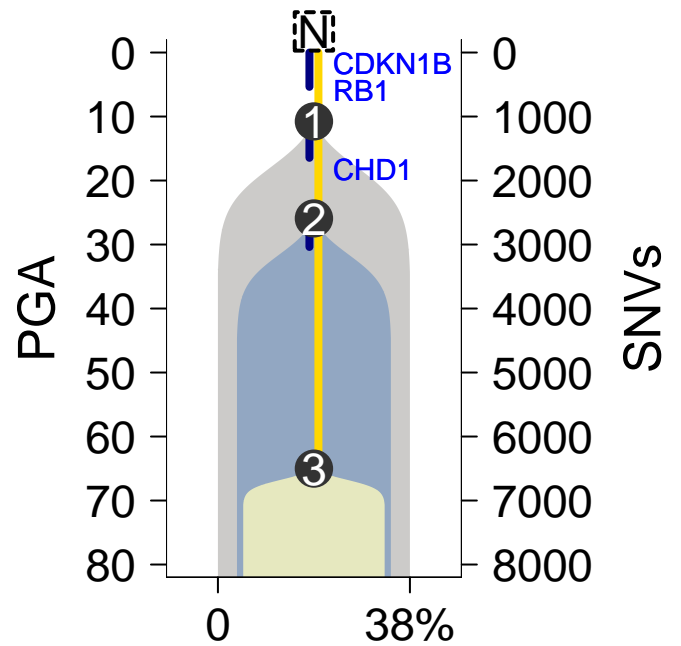

# CPCG0120

## SomaticSniper–Battenberg

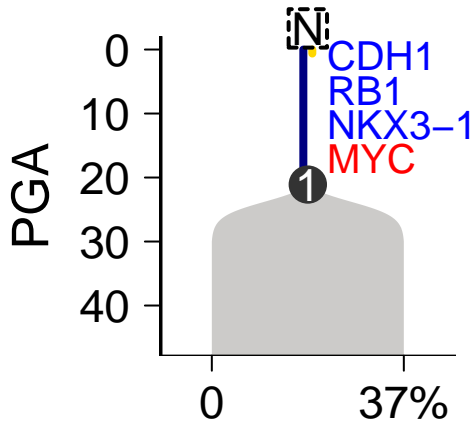

## SomaticSniper–TITAN

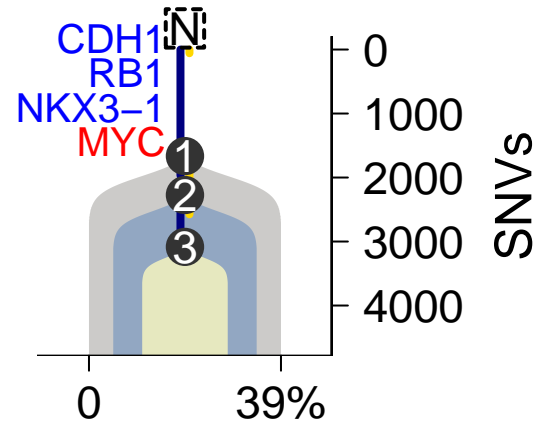

## MuTect–Battenberg

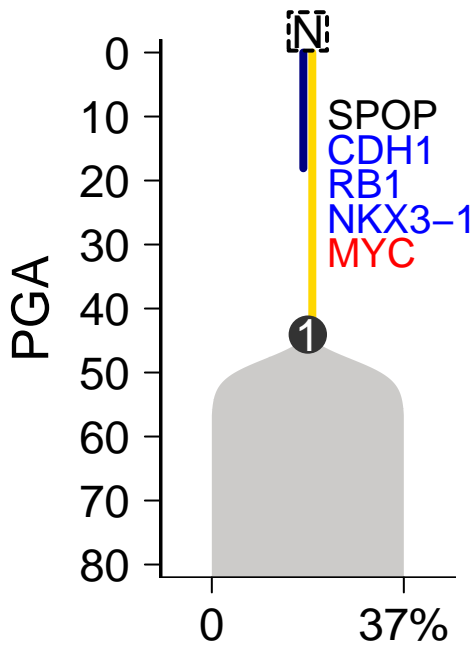

## MuTect–TITAN

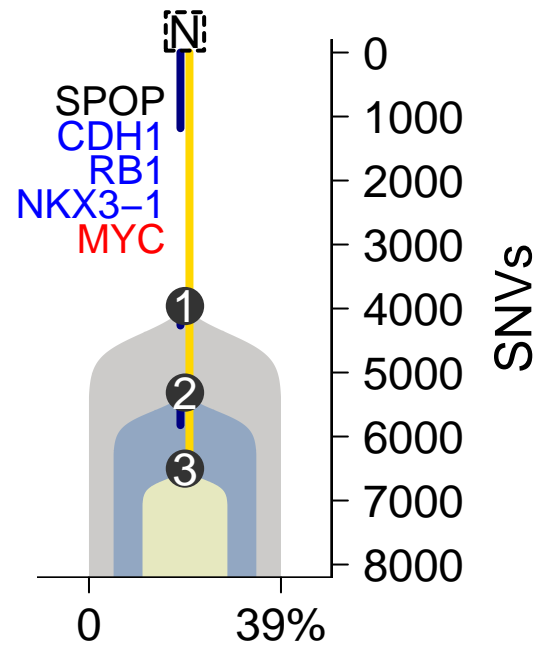

# CPCG0121

## SomaticSniper–Battenberg

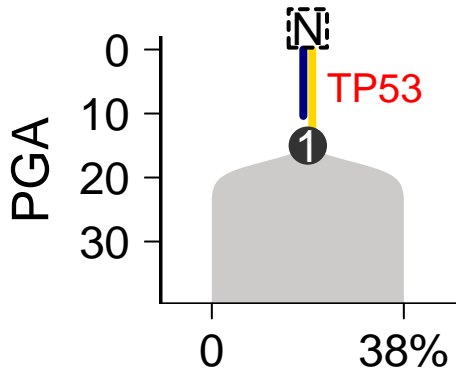

## SomaticSniper–TITAN

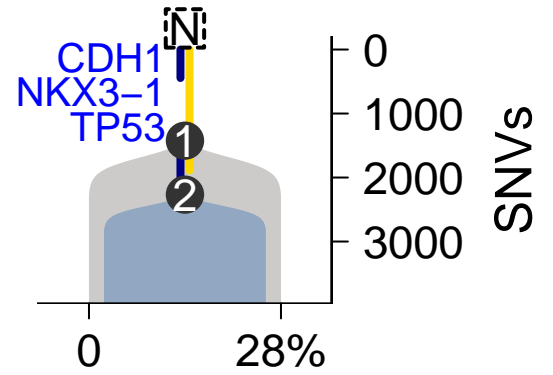

## MuTect–Battenberg

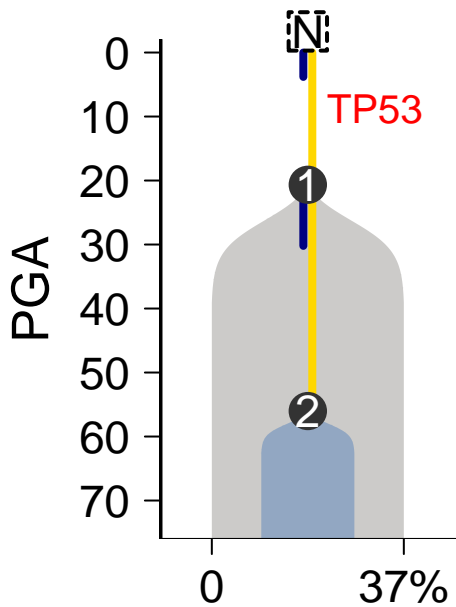

## MuTect–TITAN

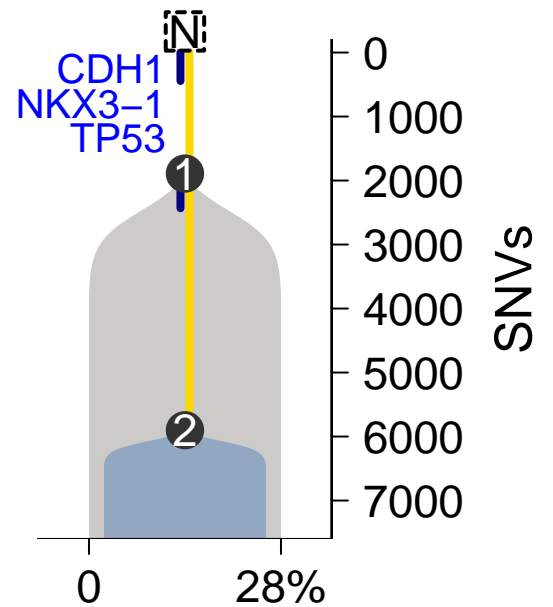

# CPCG0122

## SomaticSniper-Battenberg

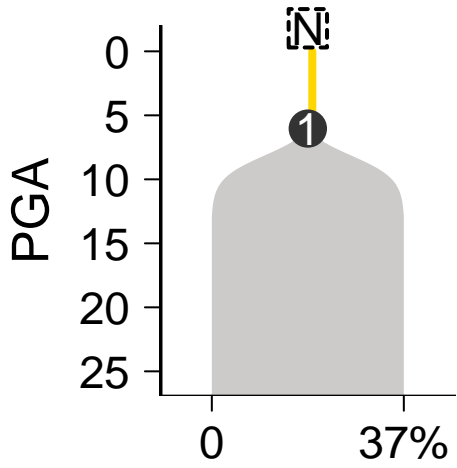

## SomaticSniper-TITAN

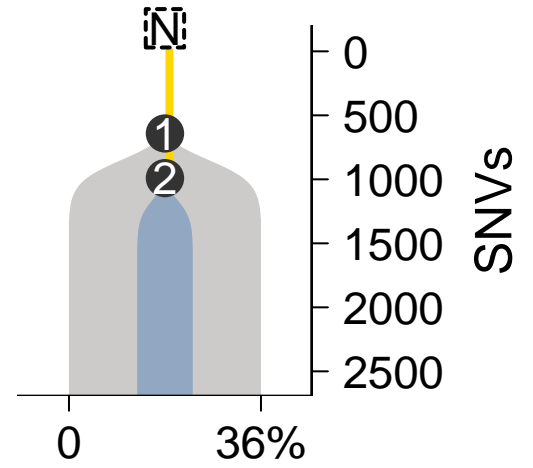

# CPCG0123

## SomaticSniper-Battenberg

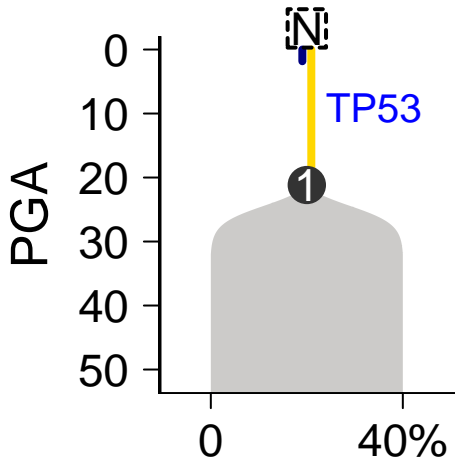

## SomaticSniper-TITAN

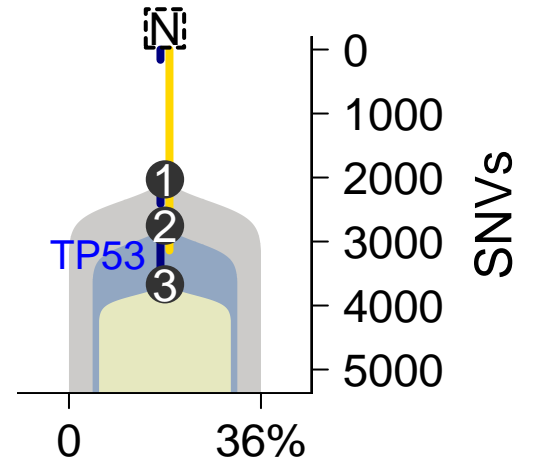

## MuTect-Battenberg

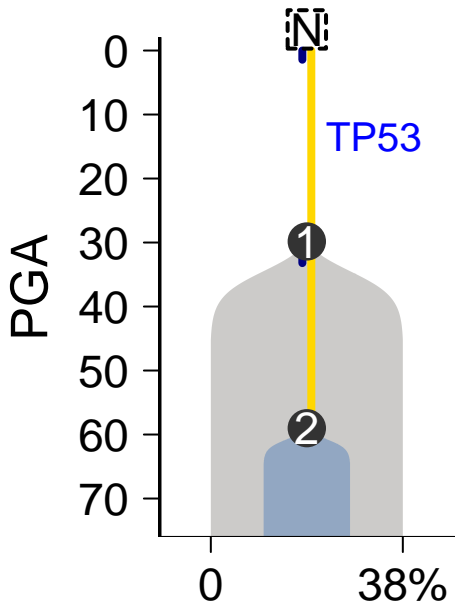

## MuTect-TITAN

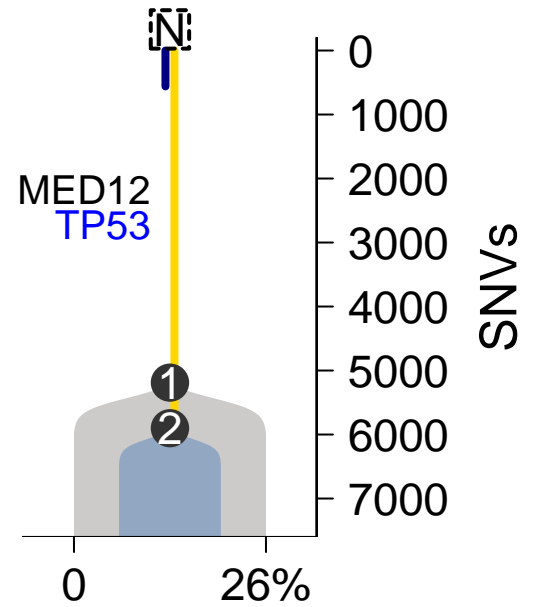

# CPCG0124

## SomaticSniper-TITAN

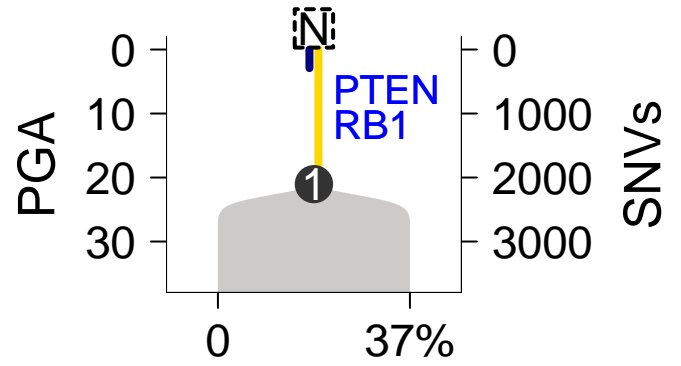

## MuTect-TITAN

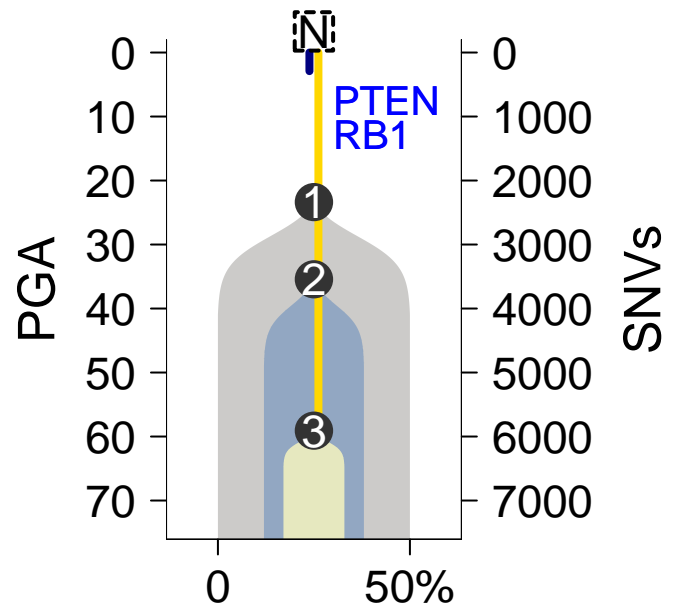

# CPCG0127

## SomaticSniper-Battenberg

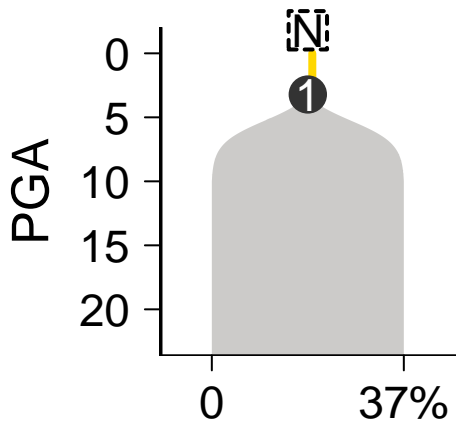

## SomaticSniper-TITAN

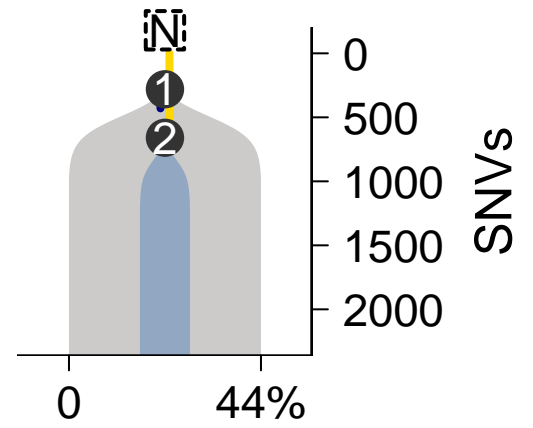

## MuTect-Battenberg

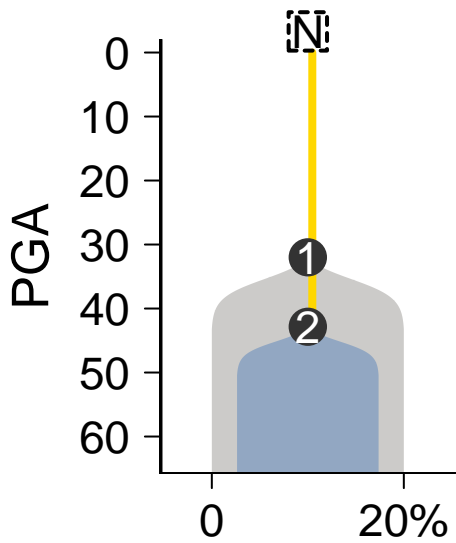

## MuTect-TITAN

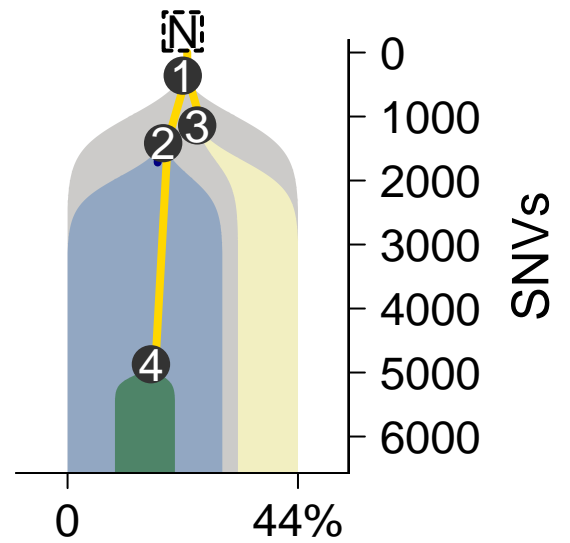

# CPCG0128

## SomaticSniper-Battenberg

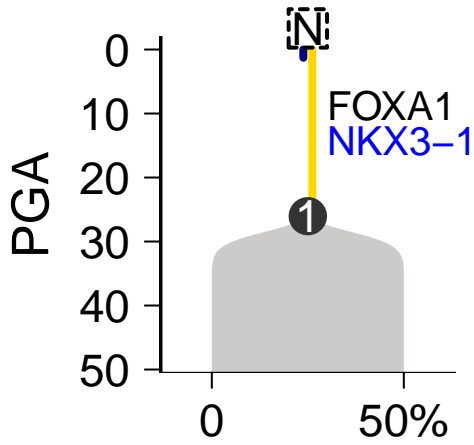

## SomaticSniper-TITAN

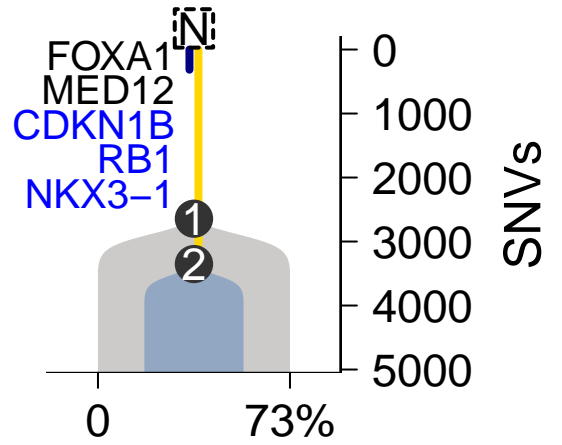

## MuTect-Battenberg

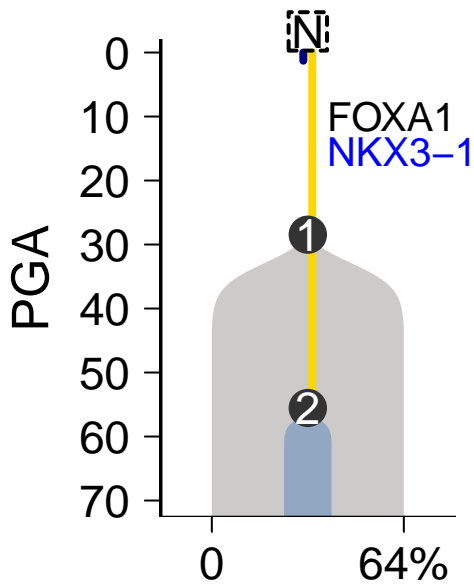

## MuTect-TITAN

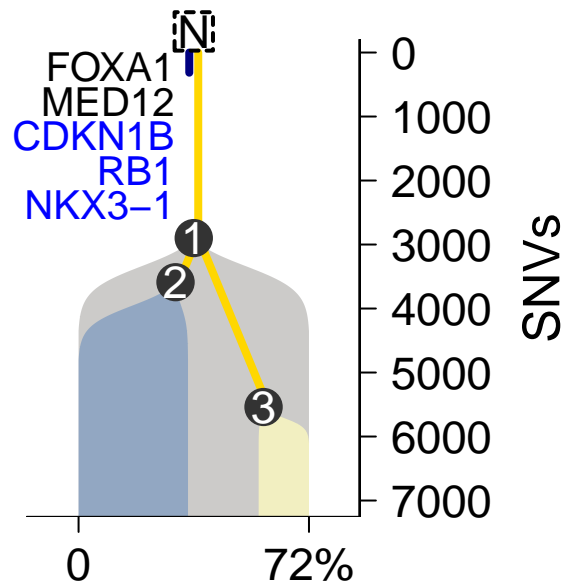



# CPCG0154

## SomaticSniper-Battenberg

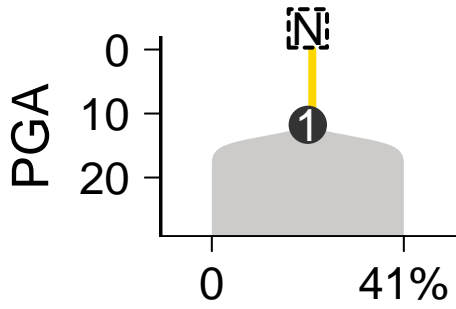

## SomaticSniper-TITAN

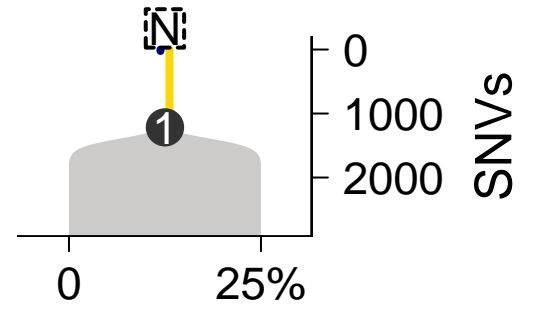

## MuTect-Battenberg

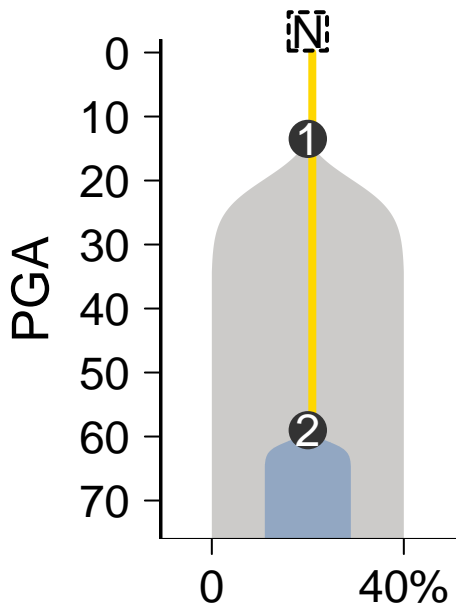

## MuTect-TITAN

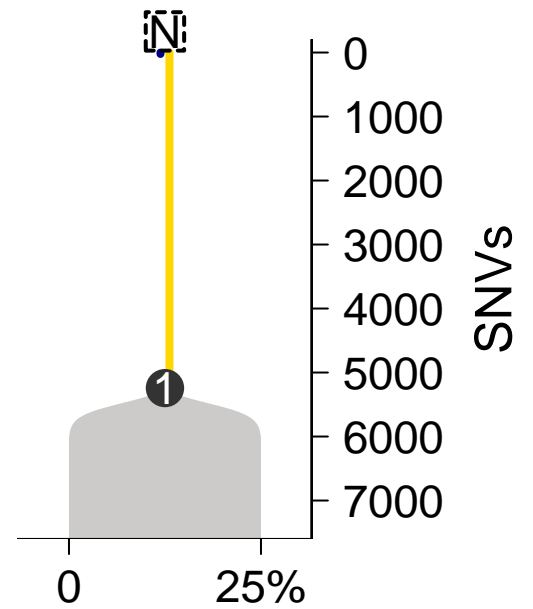

# CPCG0158

## SomaticSniper–Battenberg

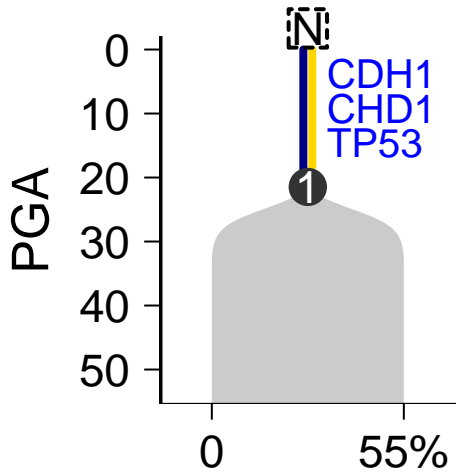

## SomaticSniper–TITAN

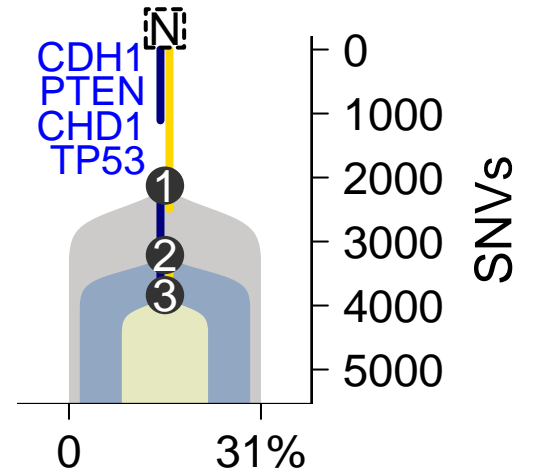

## MuTect–Battenberg

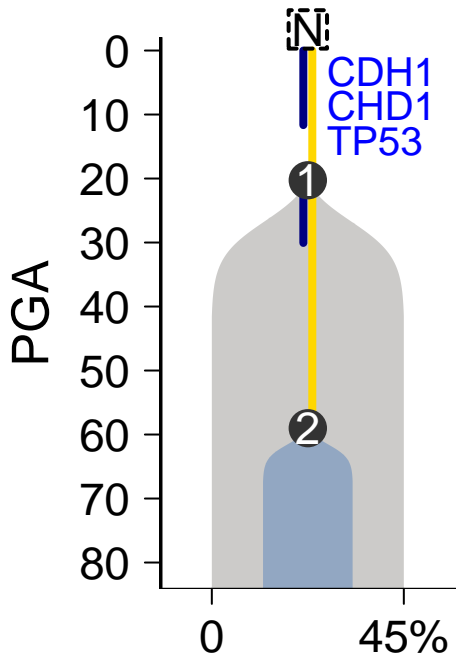

## MuTect–TITAN

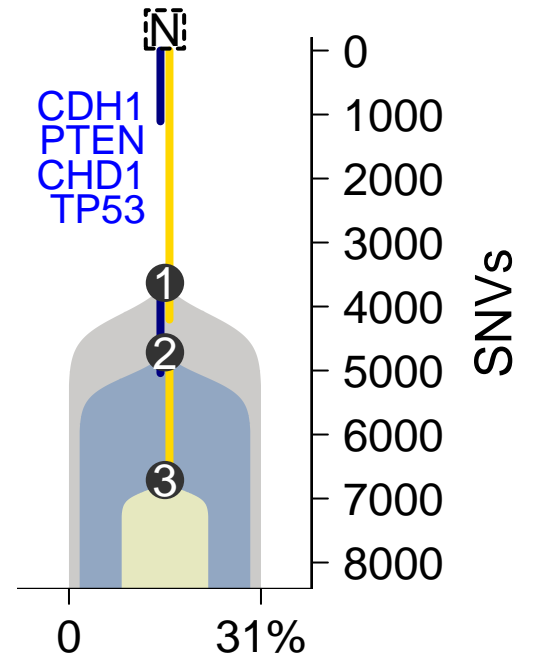

# CPCG0166

SomaticSniper-Battenberg

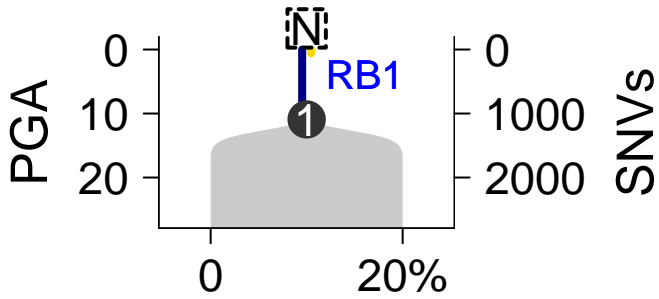

SomaticSniper-TITAN

Poly-tumour

MuTect-Battenberg

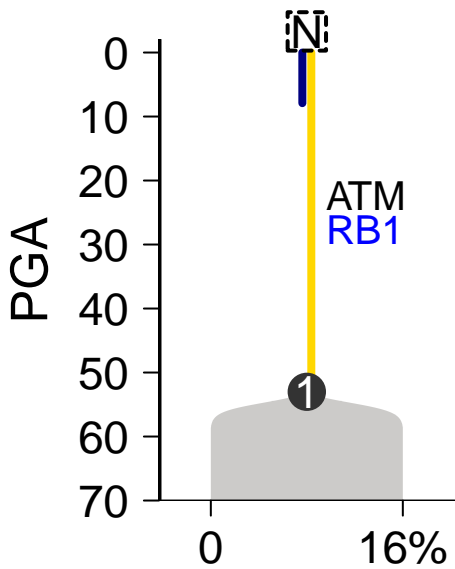

MuTect-TITAN

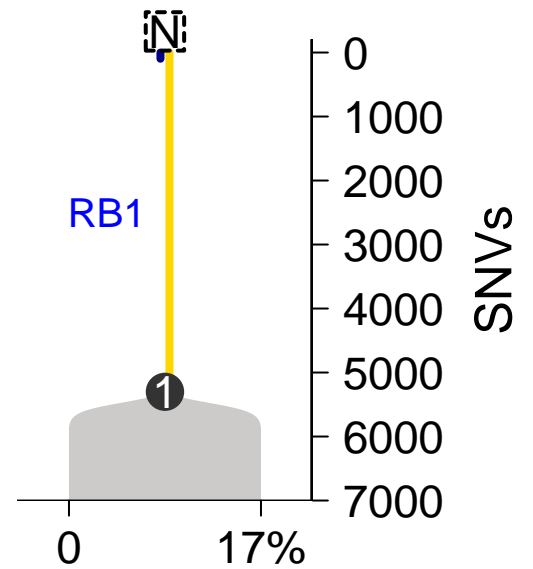

# CPCG0182

## SomaticSniper-Battenberg

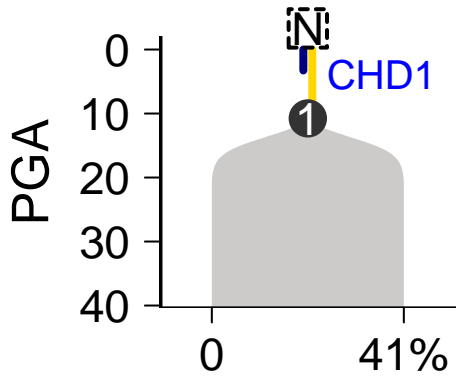

## SomaticSniper-TITAN

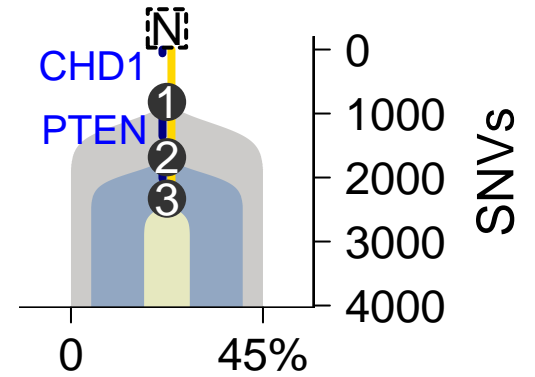

## MuTect-Battenberg

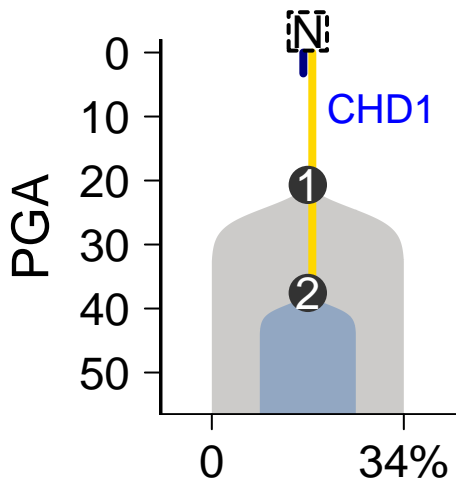

## MuTect-TITAN

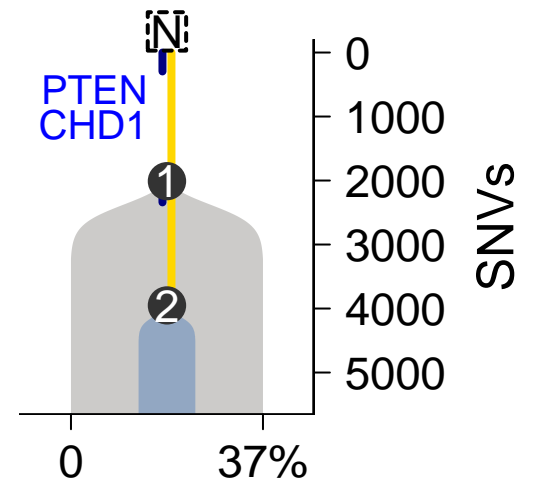

# CPCG0183

## SomaticSniper-Battenberg

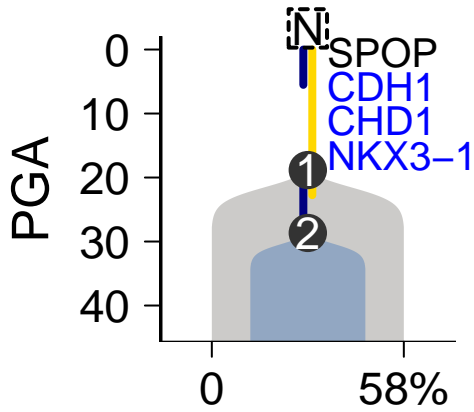

## SomaticSniper-TITAN

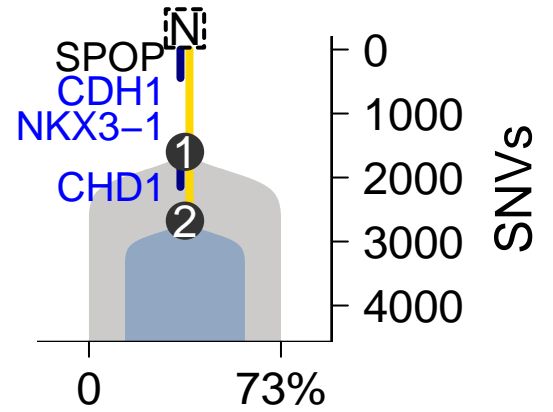

## MuTect-Battenberg

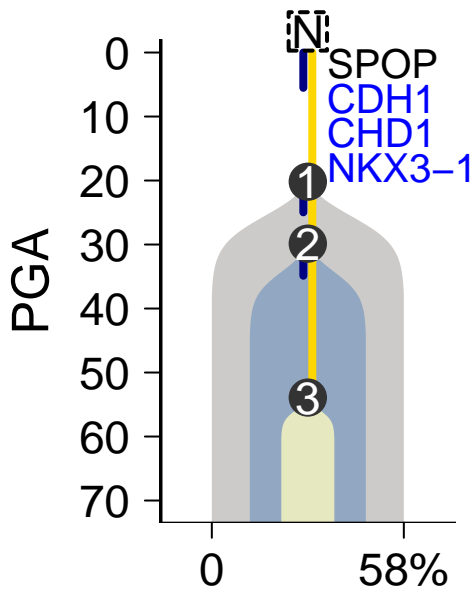

## MuTect-TITAN

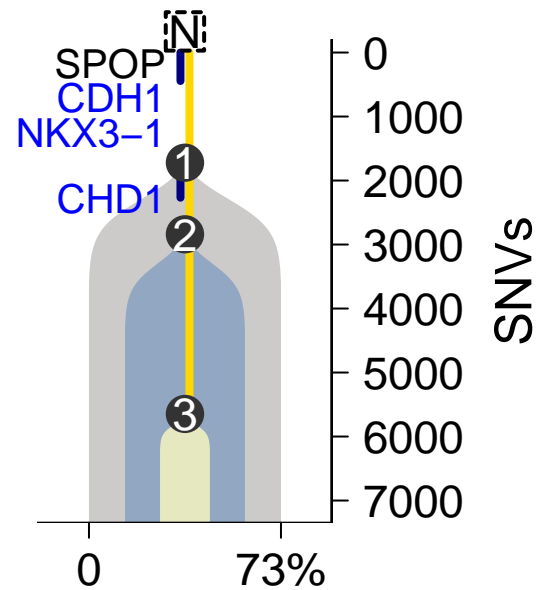

# CPCG0184

## SomaticSniper-Battenberg

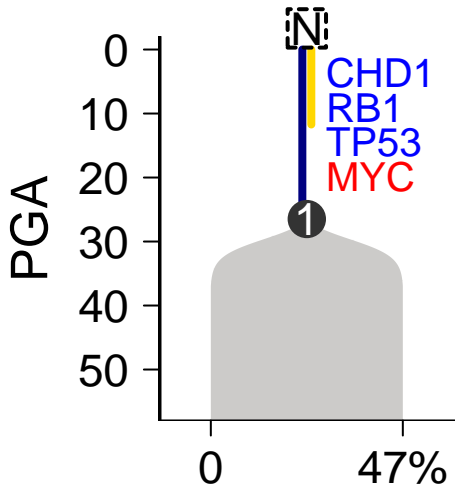

## SomaticSniper-TITAN

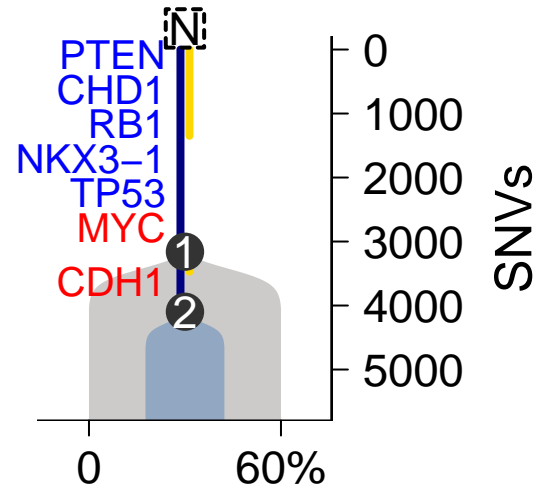

## MuTect-Battenberg

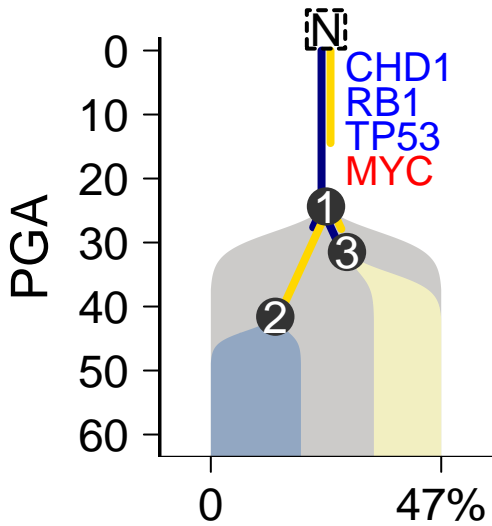

## MuTect-TITAN

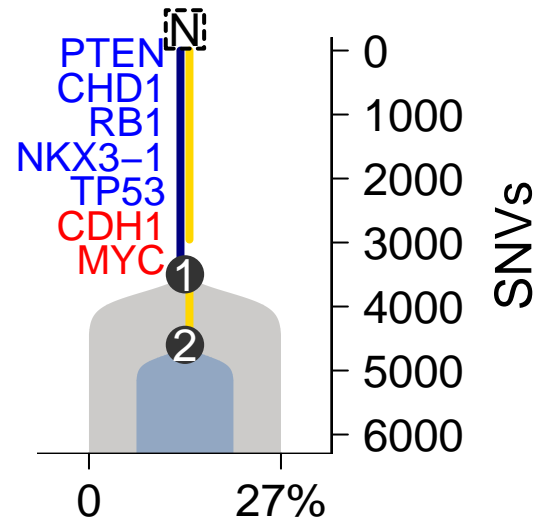

# CPCG0185

## SomaticSniper-Battenberg

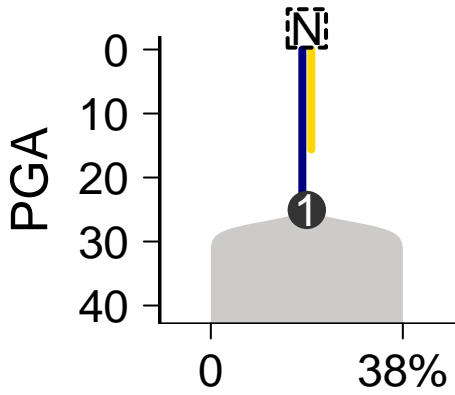

## SomaticSniper-TITAN

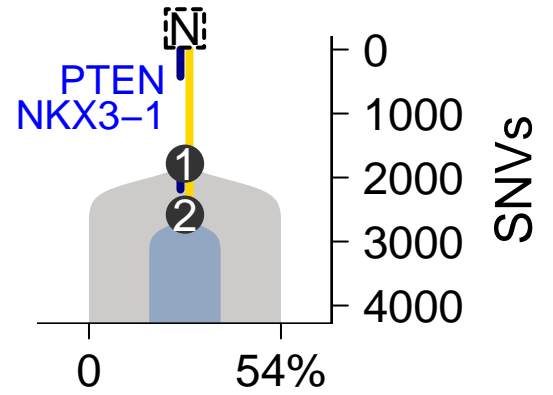

## MuTect-Battenberg

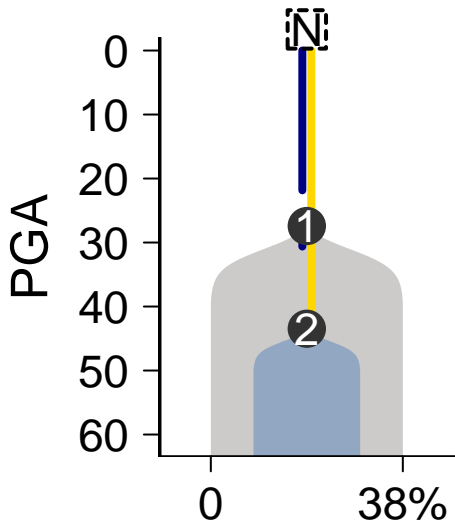

## MuTect-TITAN

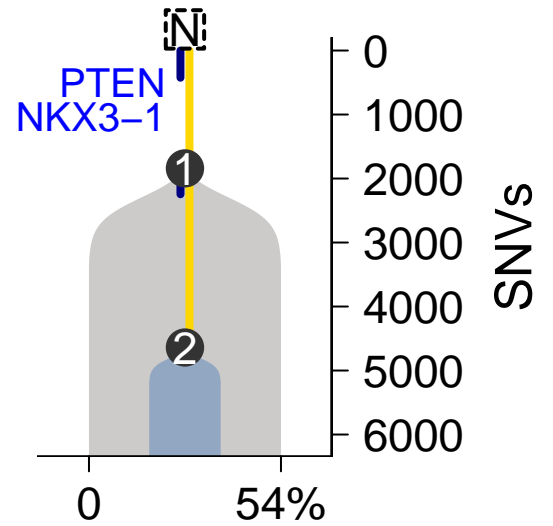

# CPCG0188

## SomaticSniper-Battenberg

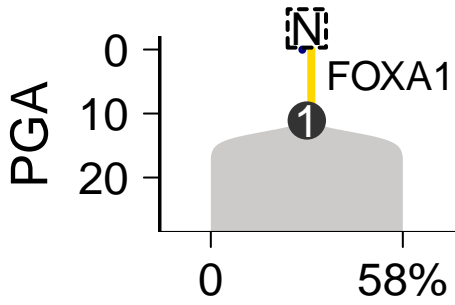

## SomaticSniper-TITAN

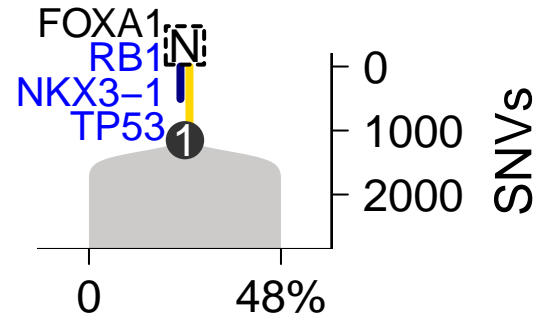

## MuTect-Battenberg

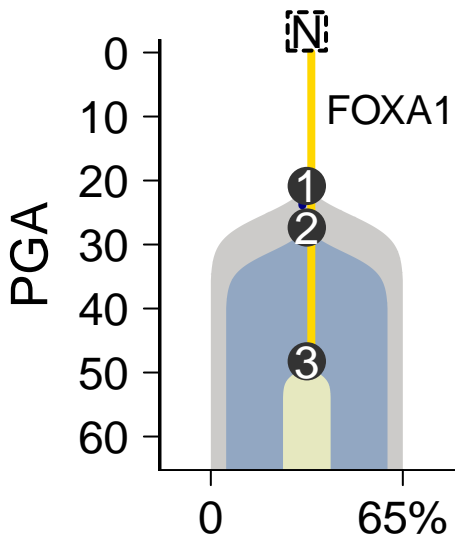

## MuTect-TITAN

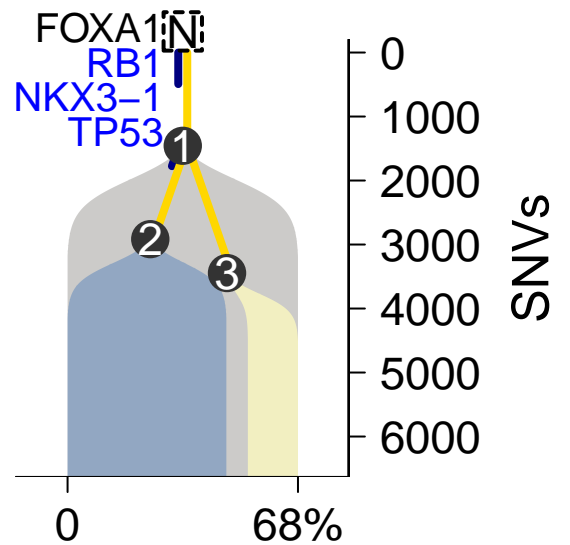



# CPCG0189

## SomaticSniper–Battenberg

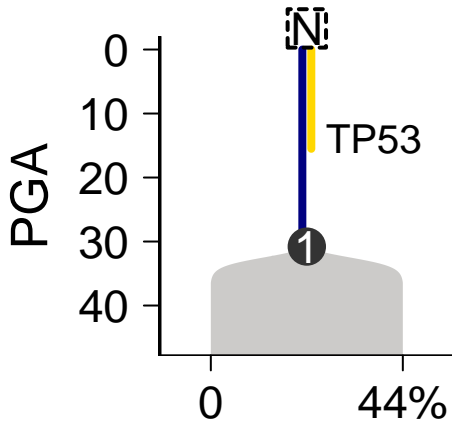

## SomaticSniper–TITAN

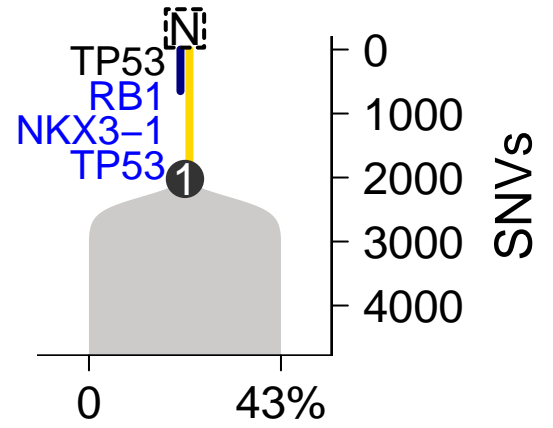

## MuTect–Battenberg

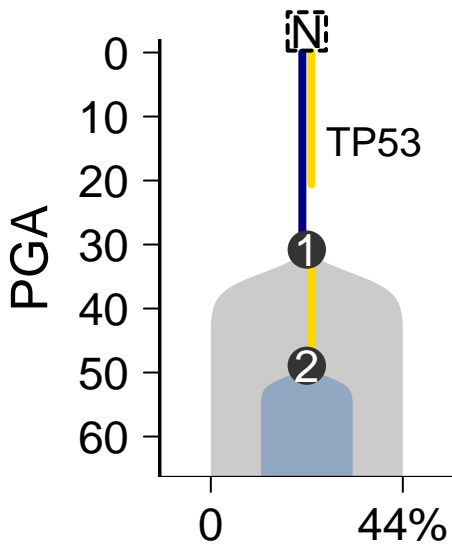

## MuTect–TITAN

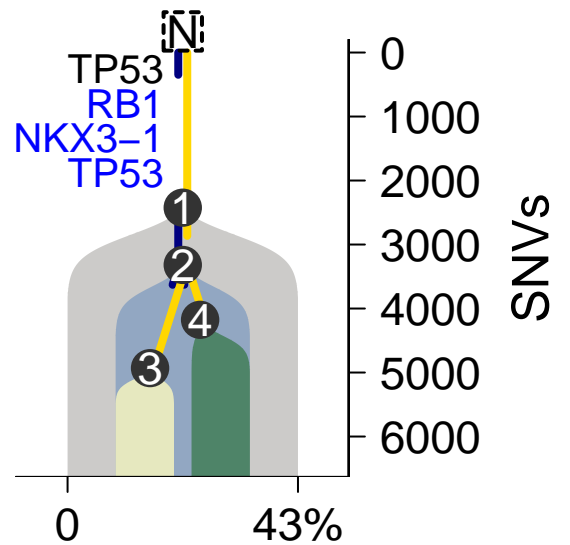

# CPCG0190

## SomaticSniper-Battenberg

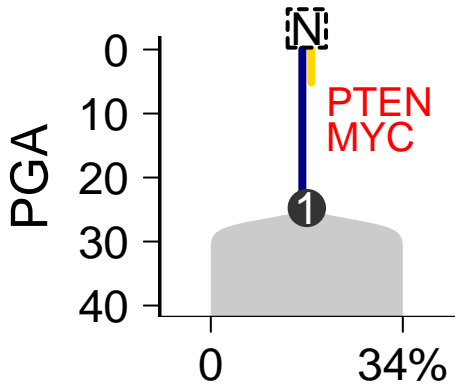

## SomaticSniper-TITAN

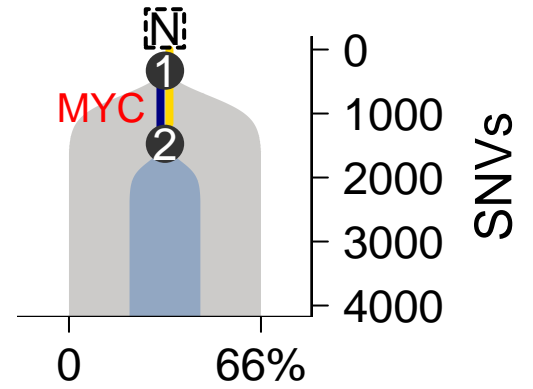

## MuTect-Battenberg

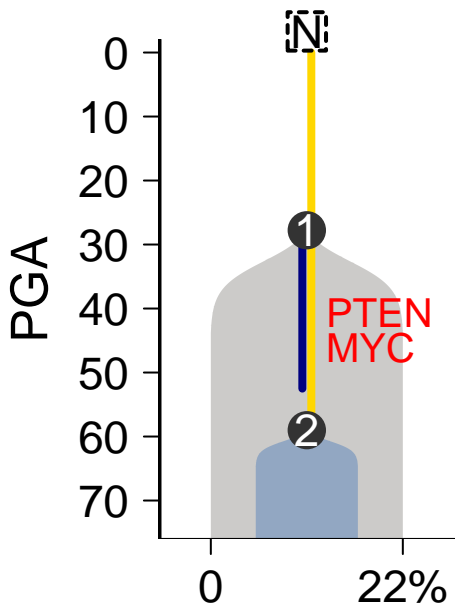

## MuTect-TITAN

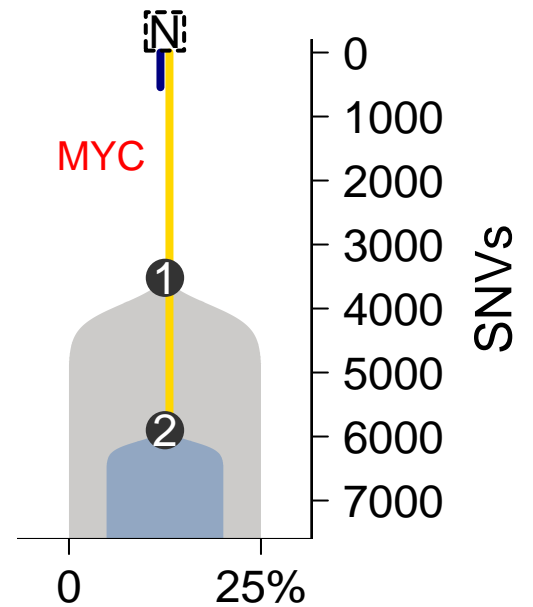

# CPCG0191

## SomaticSniper-Battenberg

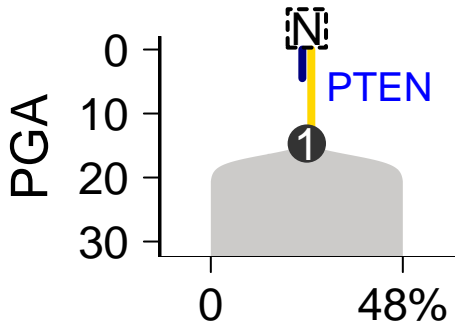

## SomaticSniper-TITAN

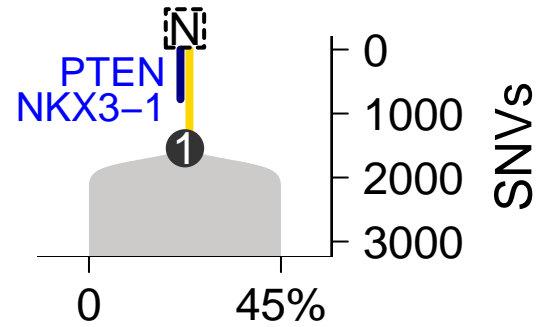

## MuTect-Battenberg

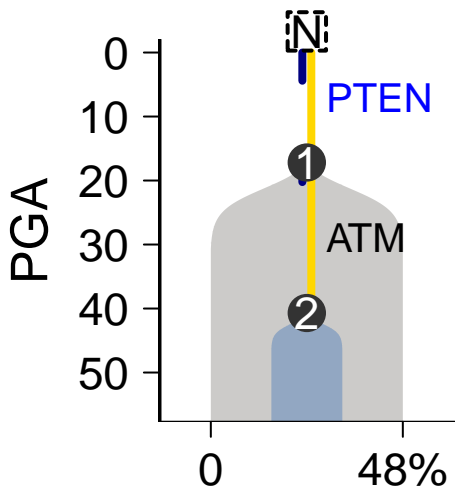

## MuTect-TITAN

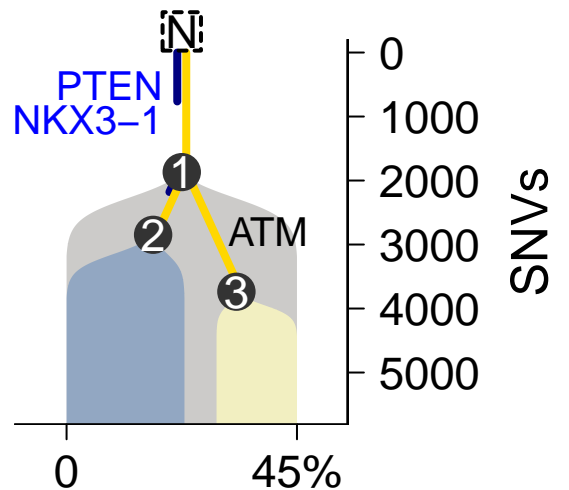

# CPCG0192

## SomaticSniper-Battenberg

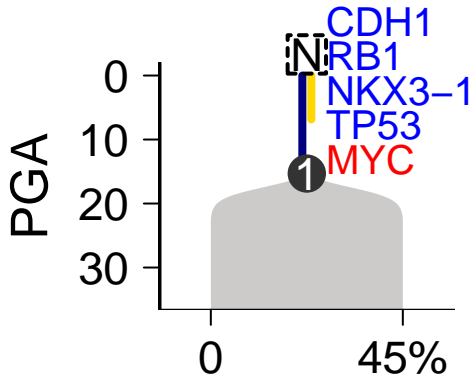

## SomaticSniper-TITAN

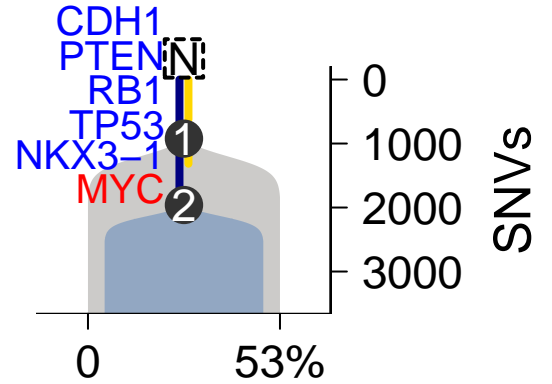

## MuTect-Battenberg

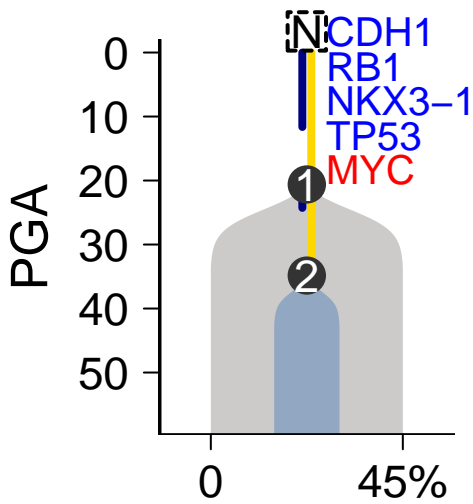

## MuTect-TITAN

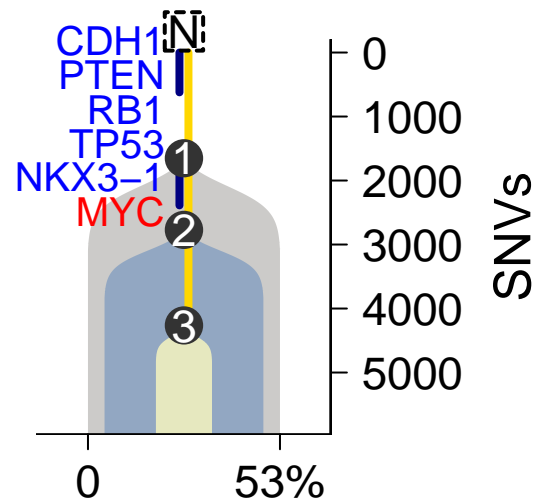

# CPCG0194

## SomaticSniper–Battenberg

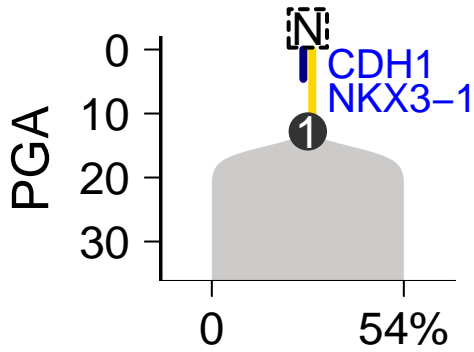

## SomaticSniper–TITAN

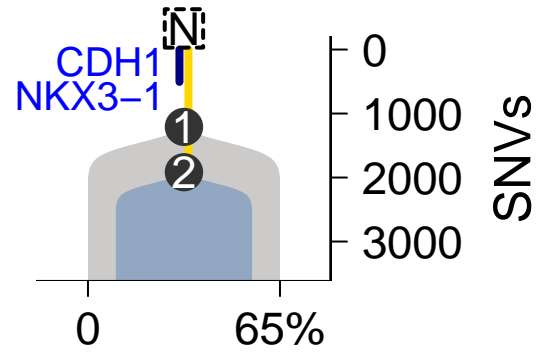

## MuTect–Battenberg

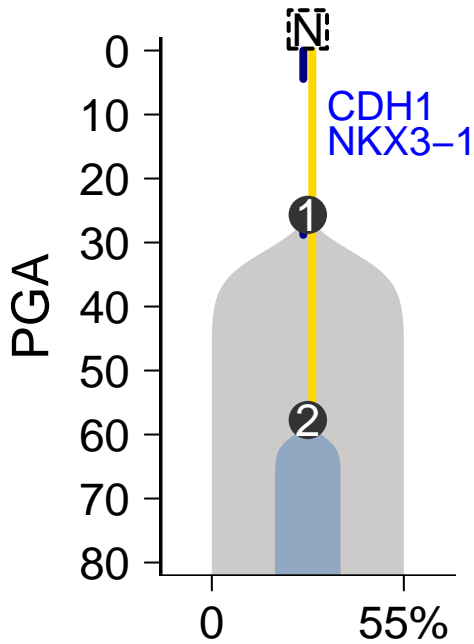

## MuTect–TITAN

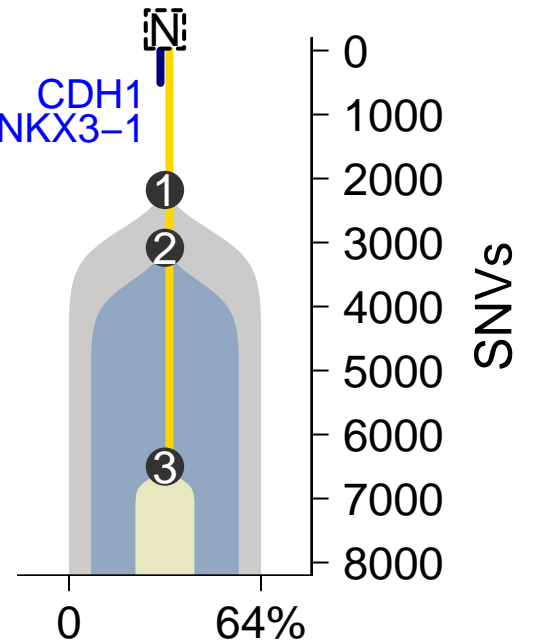

# CPCG0196

## SomaticSniper-Battenberg

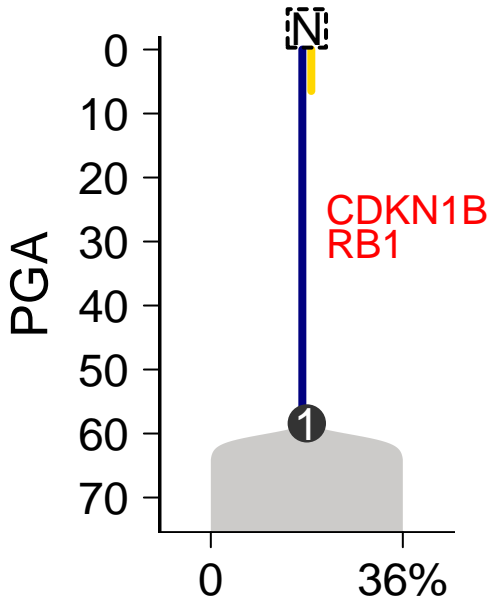

## SomaticSniper-TITAN

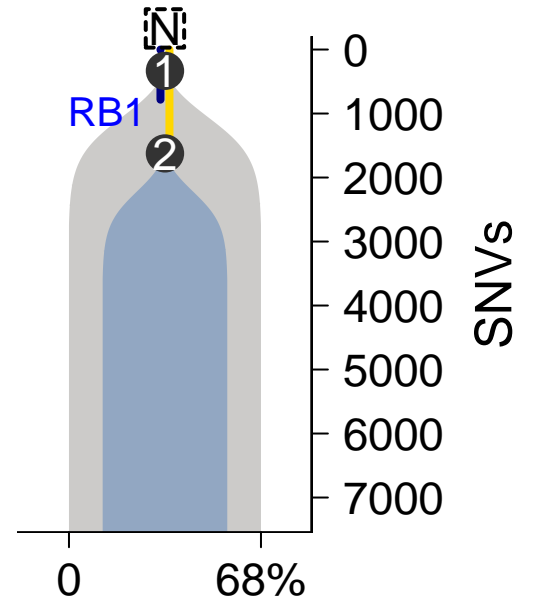

## MuTect-Battenberg

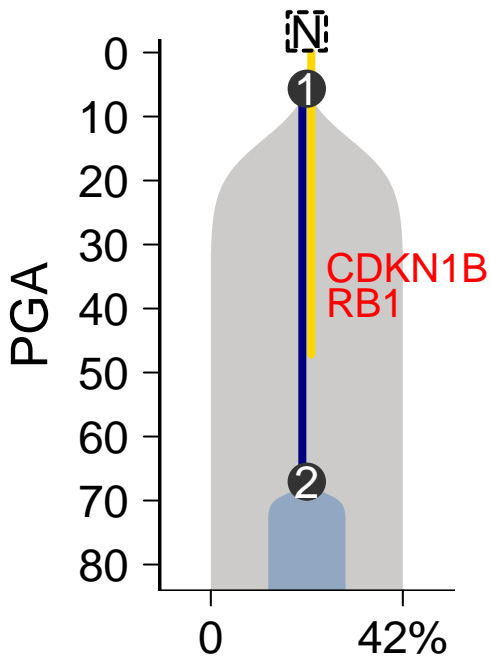

## MuTect-TITAN

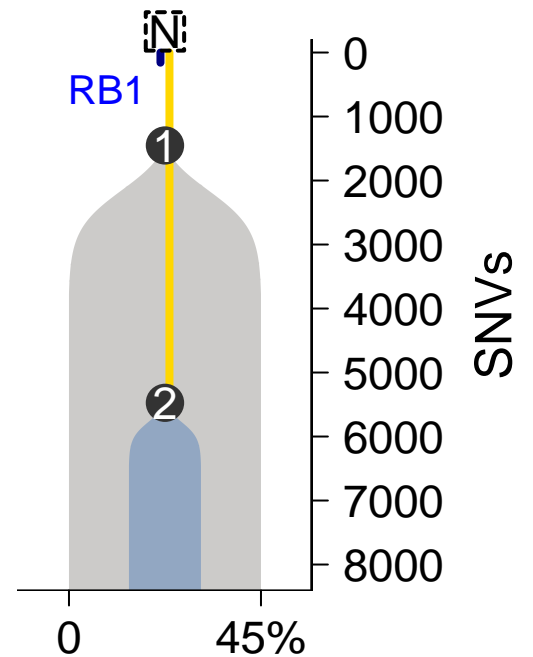

# CPCG0198

## SomaticSniper–Battenberg

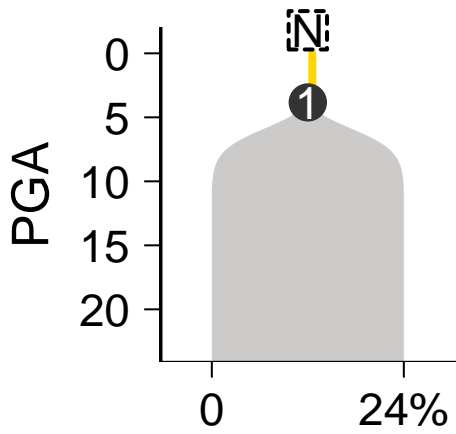

## SomaticSniper–TITAN

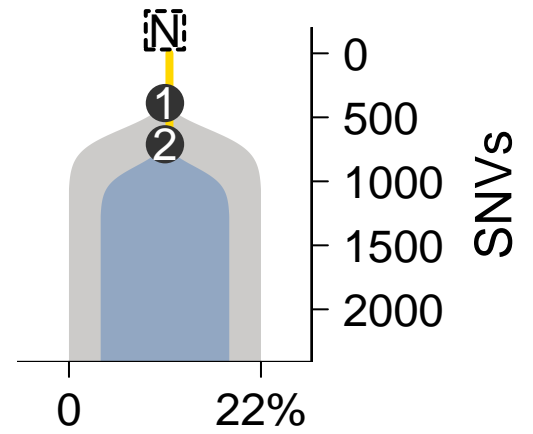

## MuTect–Battenberg

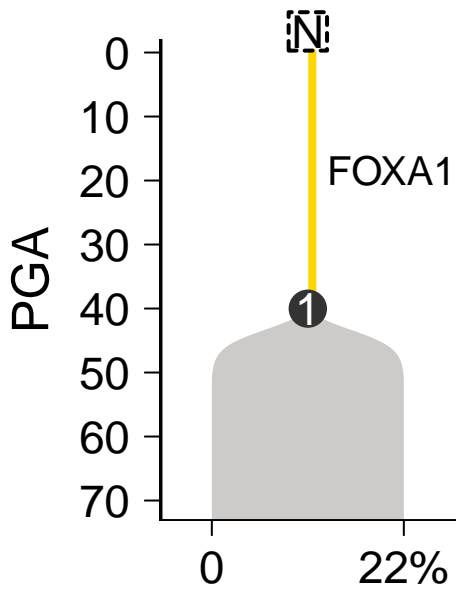

## MuTect–TITAN

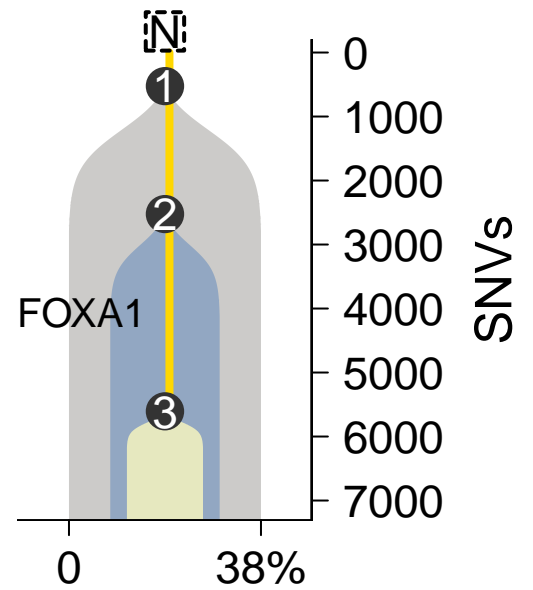

# CPCG0199

## SomaticSniper-Battenberg

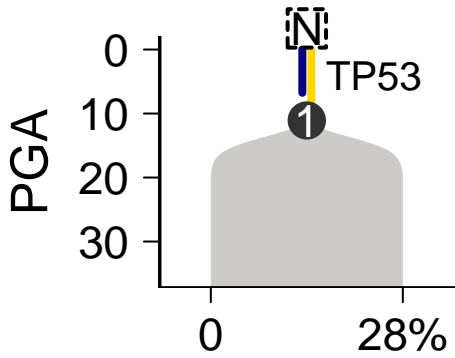

## SomaticSniper-TITAN

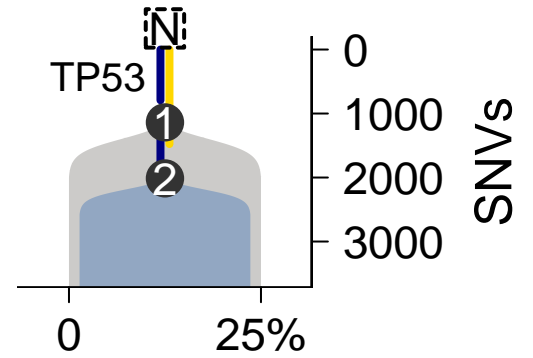

## MuTect-Battenberg

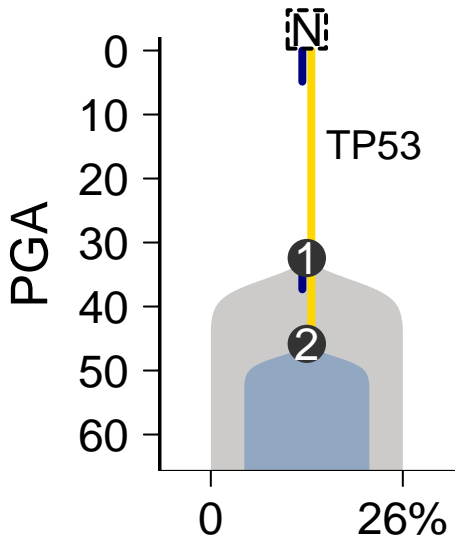

## MuTect-TITAN

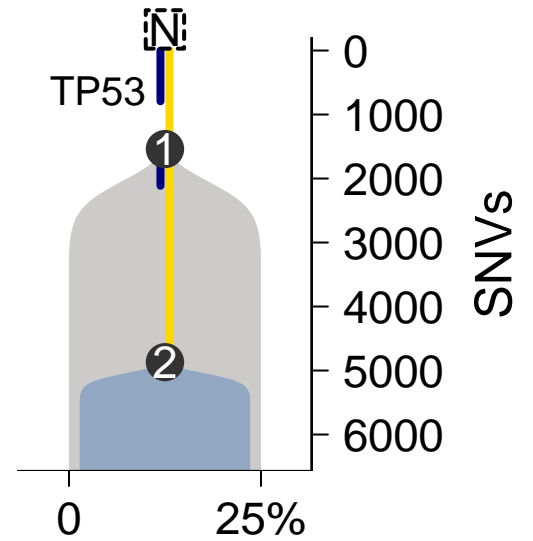



# CPCG0201

## SomaticSniper-Battenberg

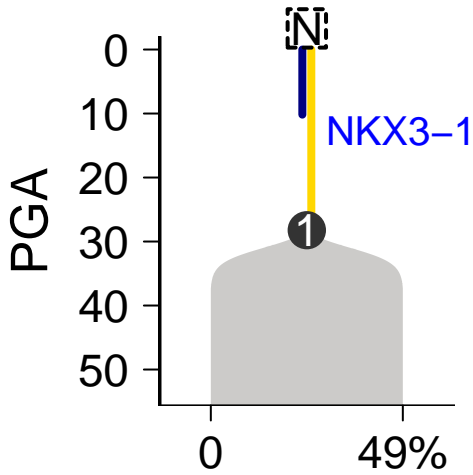

## SomaticSniper-TITAN

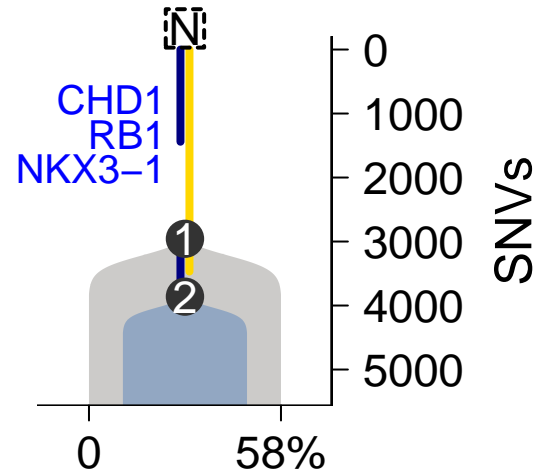

## MuTect-Battenberg

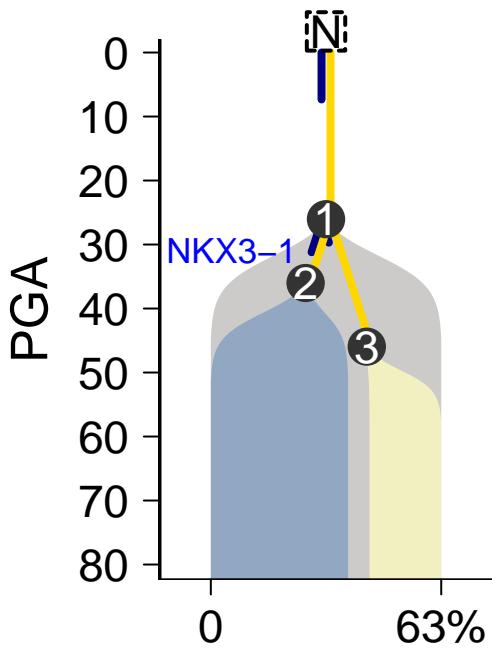

## MuTect-TITAN

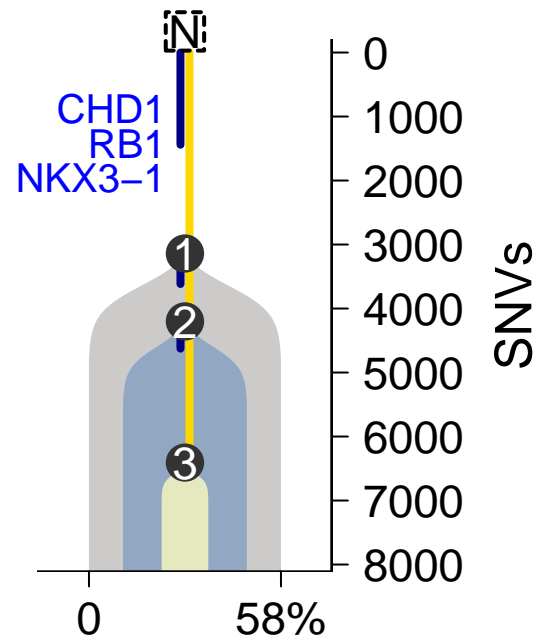

# CPCG0205

## SomaticSniper-TITAN

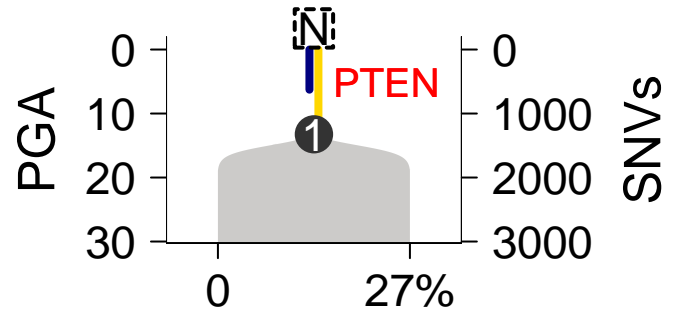

## MuTect-TITAN

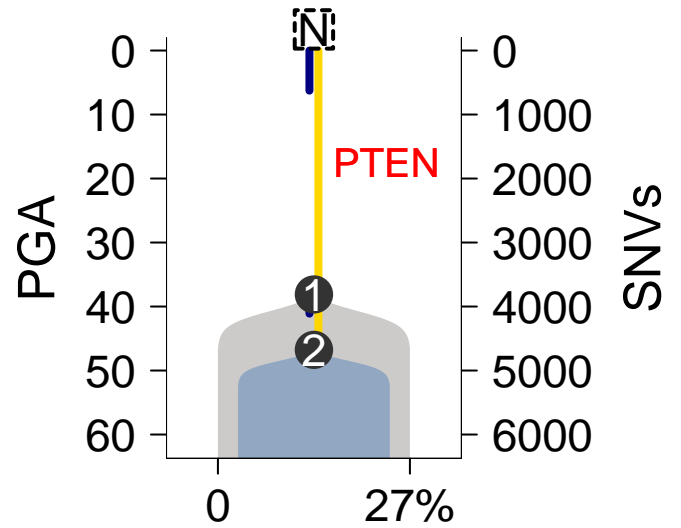

# CPCG0206

## SomaticSniper-Battenberg

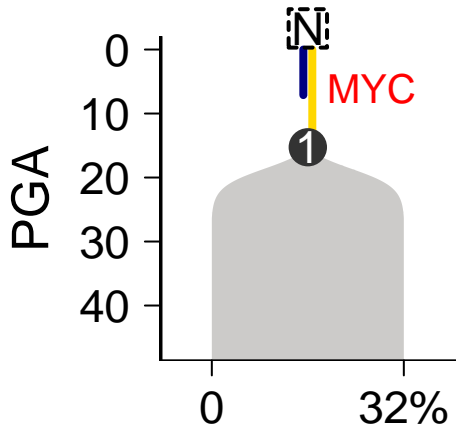

## SomaticSniper-TITAN

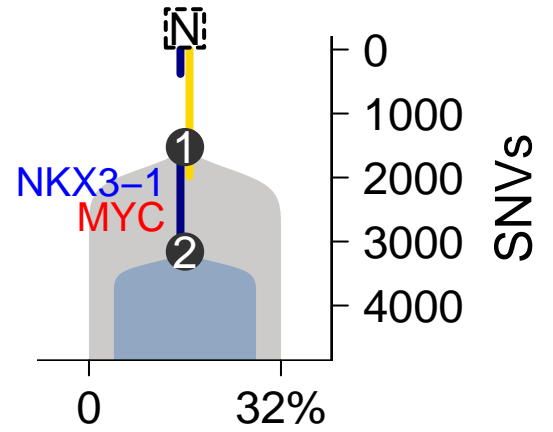

## MuTect-Battenberg

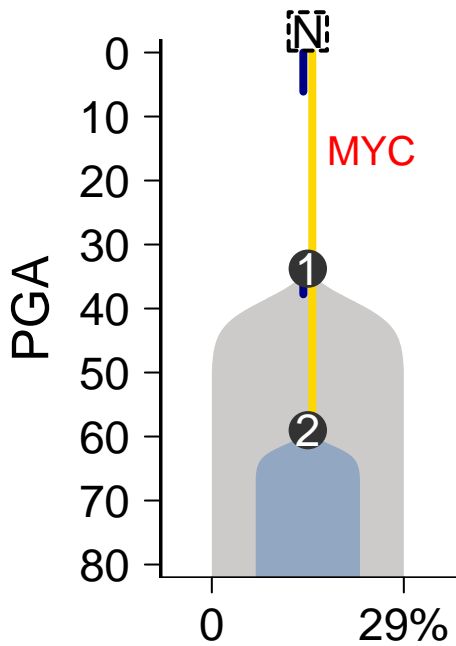

## MuTect-TITAN

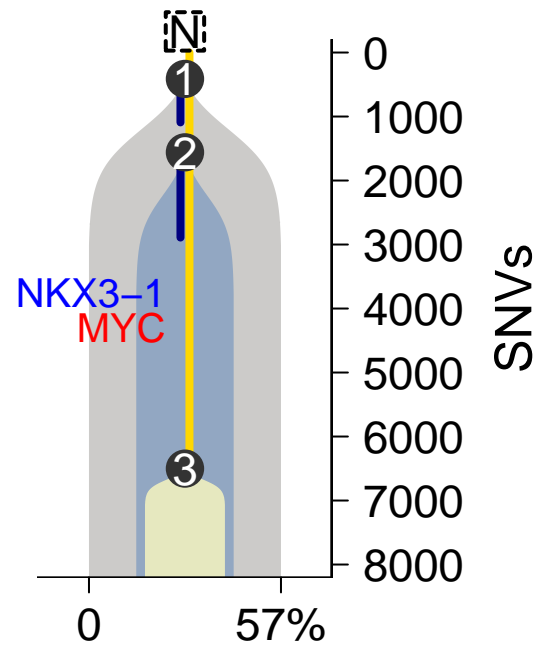

# CPCG0208

## SomaticSniper-Battenberg

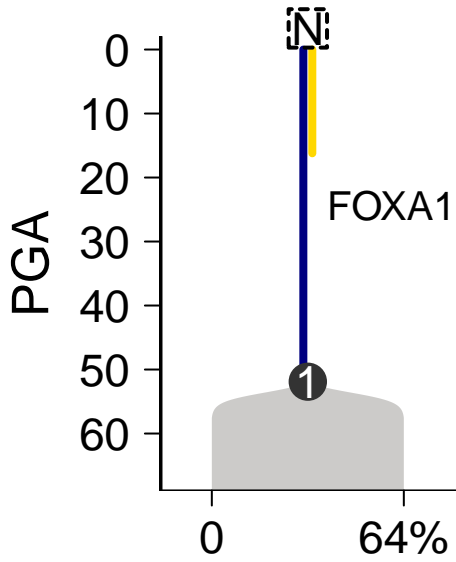

## SomaticSniper-TITAN

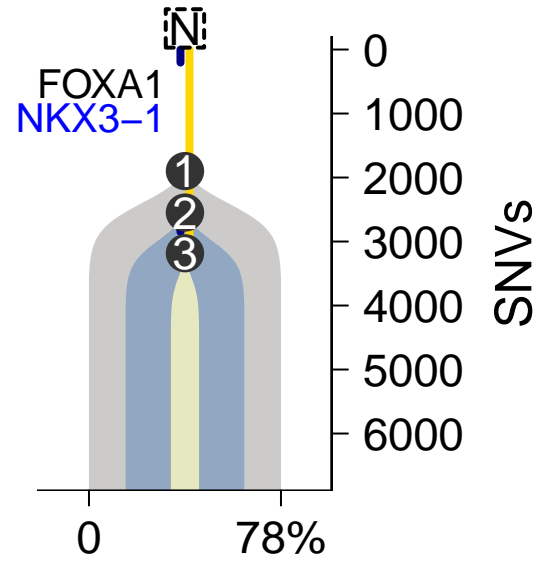

## MuTect-Battenberg

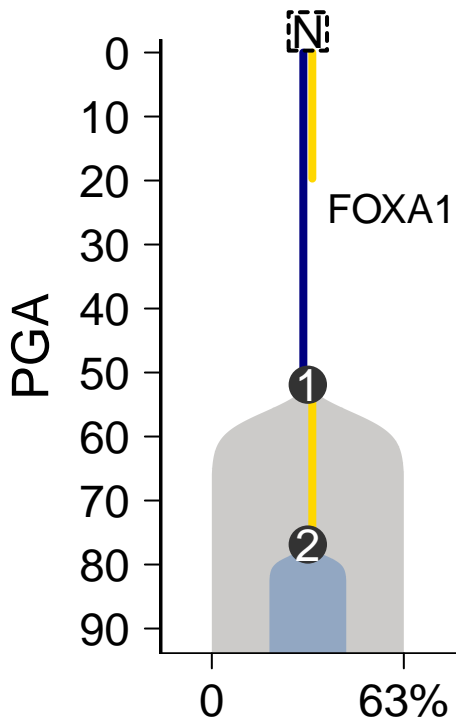

## MuTect-TITAN

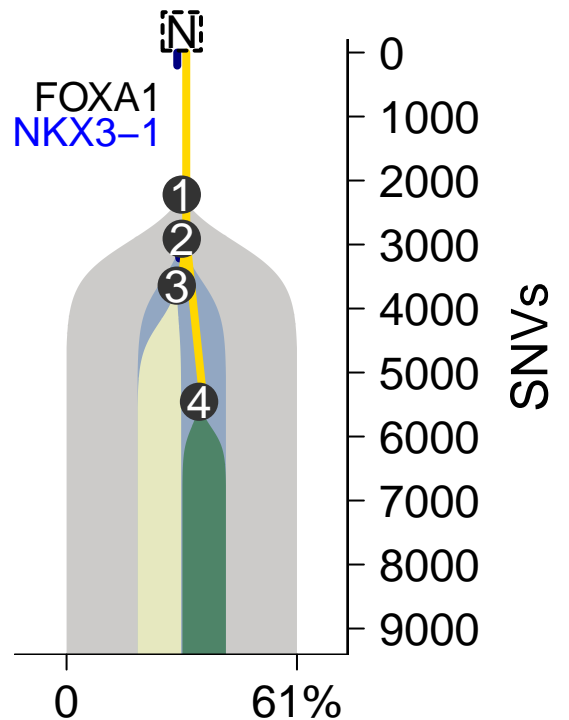

# CPCG0210

## SomaticSniper-Battenberg

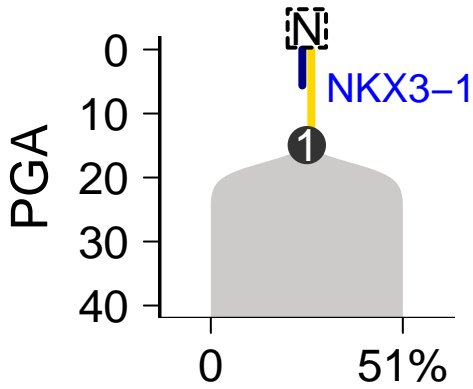

## SomaticSniper-TITAN

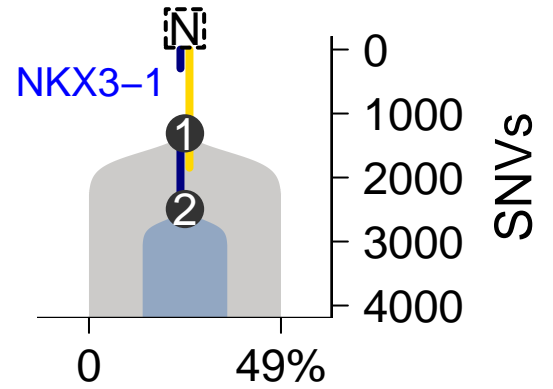

## MuTect-Battenberg

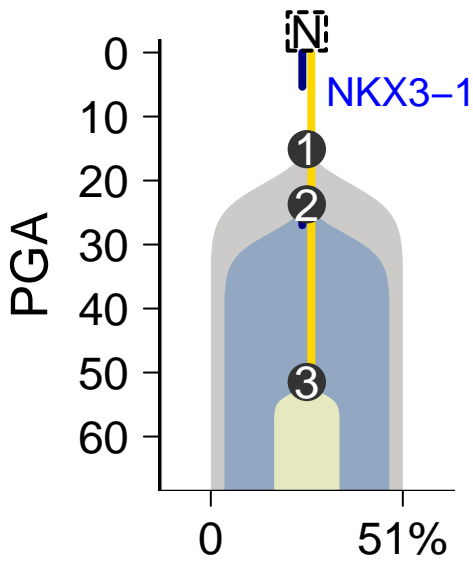

## MuTect-TITAN

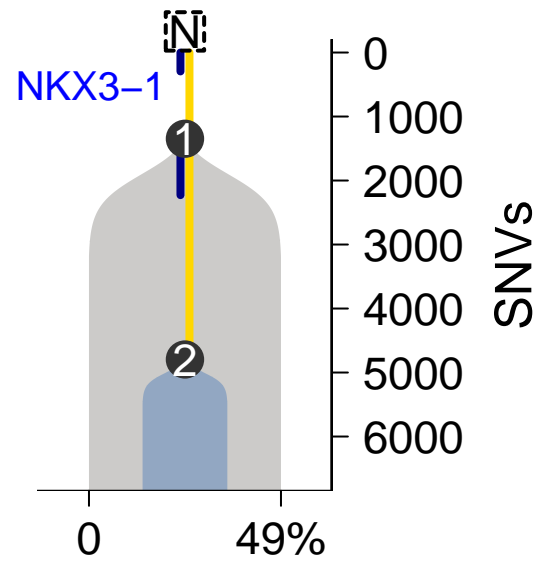

# CPCG0211

## SomaticSniper-Battenberg

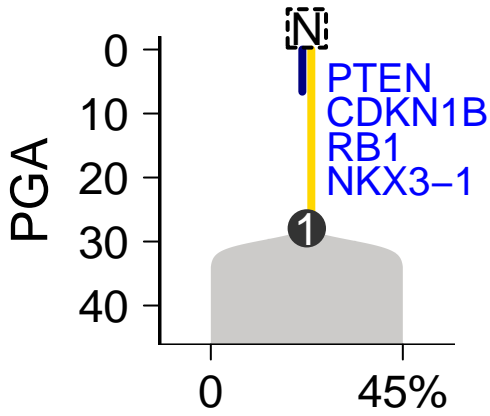

## SomaticSniper-TITAN

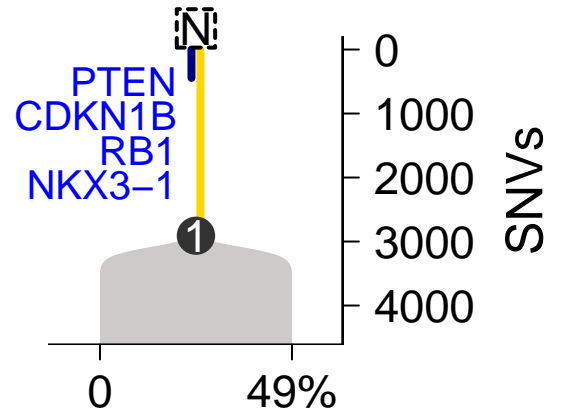

## MuTect-Battenberg

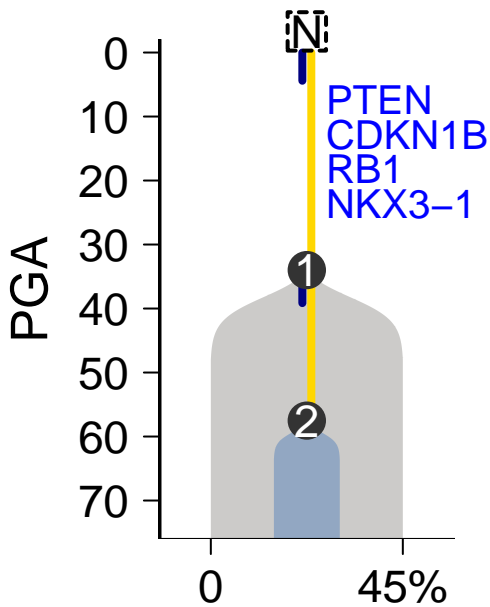

## MuTect-TITAN

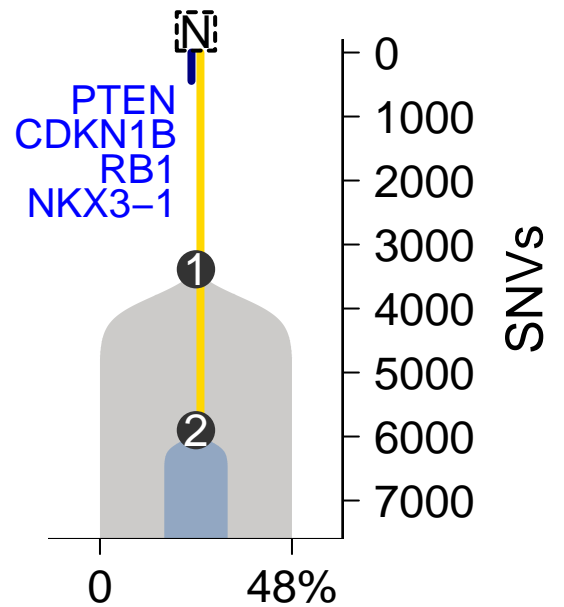

# CPCG0212

## SomaticSniper-Battenberg

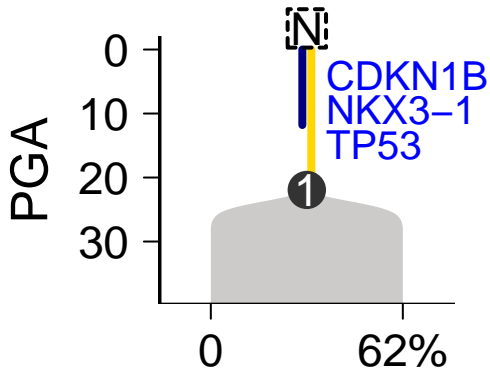

## SomaticSniper-TITAN

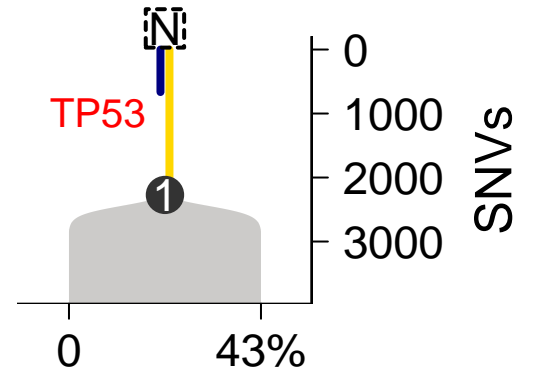

## MuTect-Battenberg

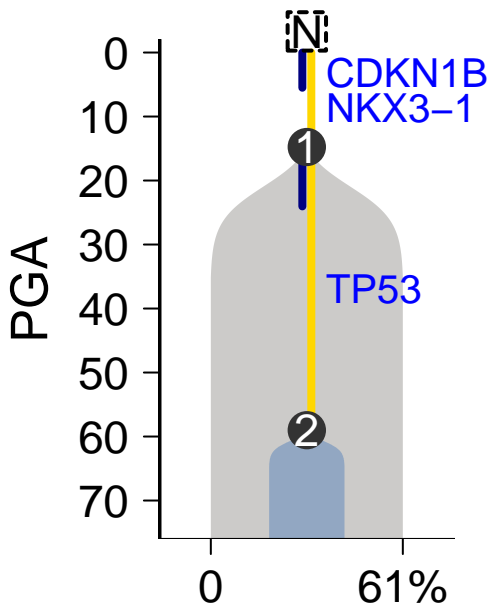

## MuTect-TITAN

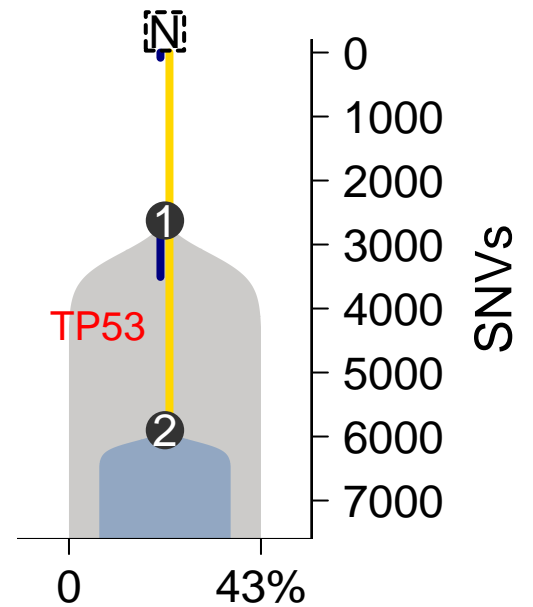

# CPCG0213

## SomaticSniper-Battenberg

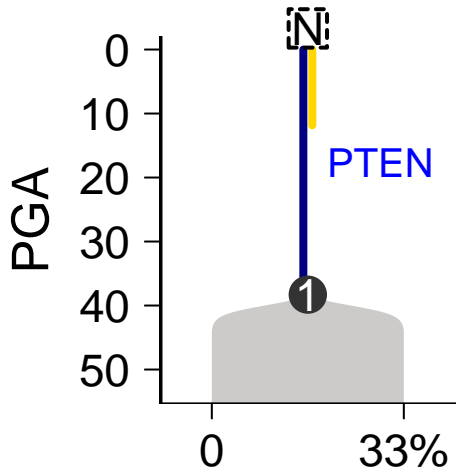

## SomaticSniper-TITAN

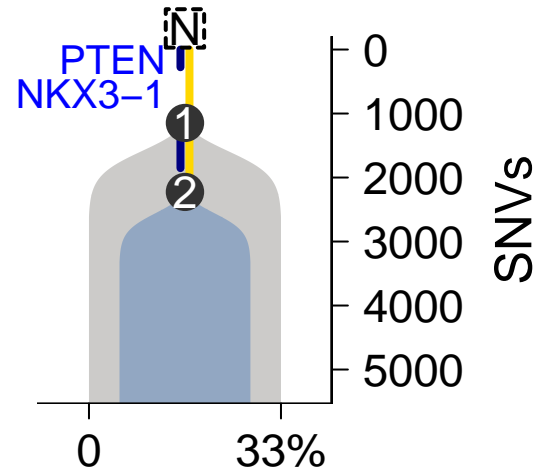

## MuTect-Battenberg

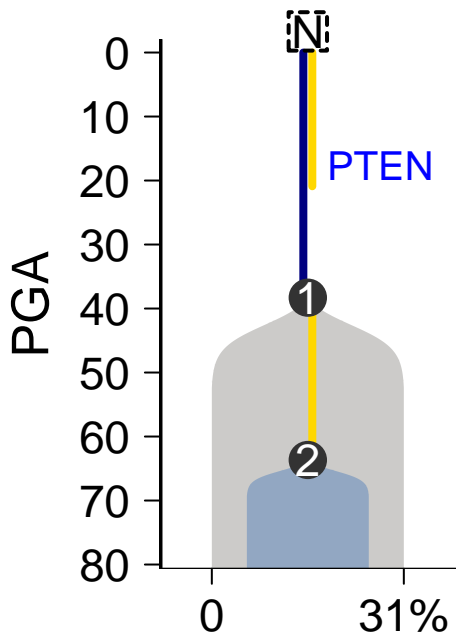

## MuTect-TITAN

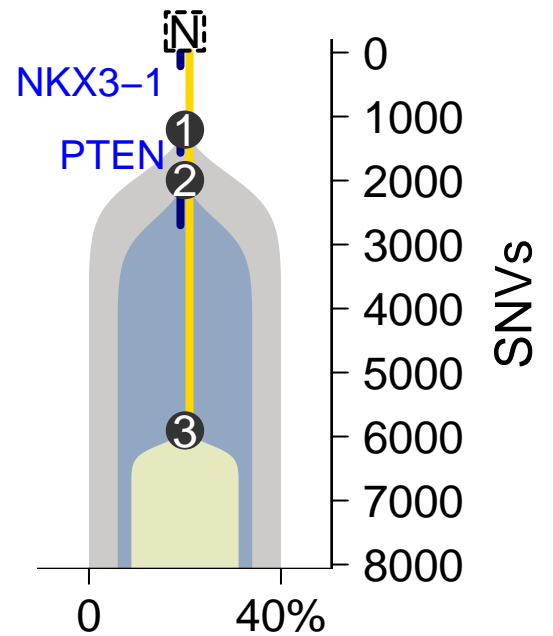



# CPCG0217

## SomaticSniper–Battenberg

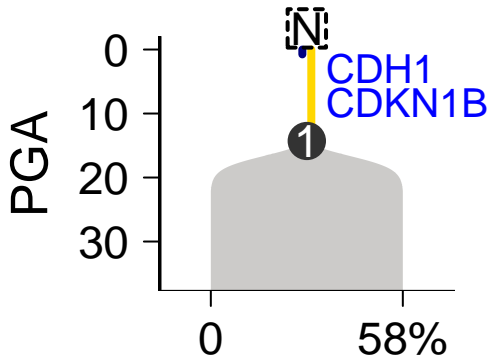

## SomaticSniper–TITAN

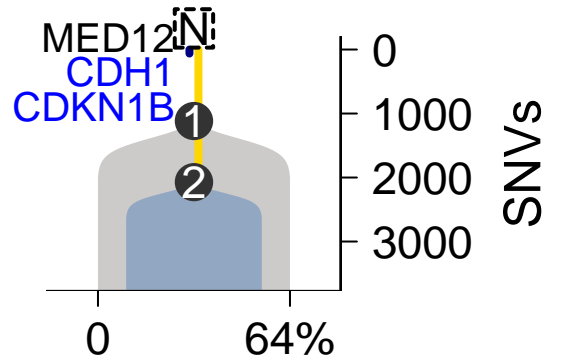

## MuTect–Battenberg

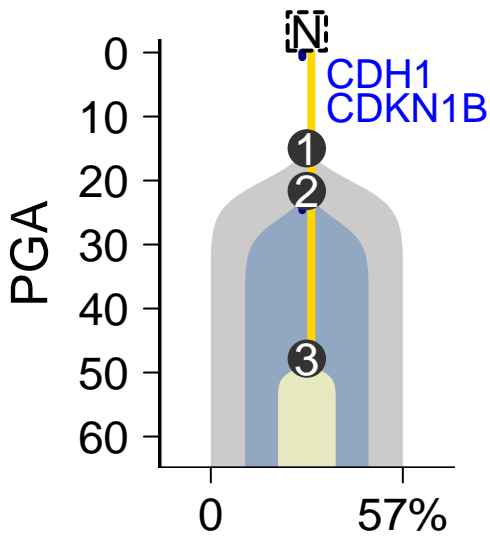

## MuTect–TITAN

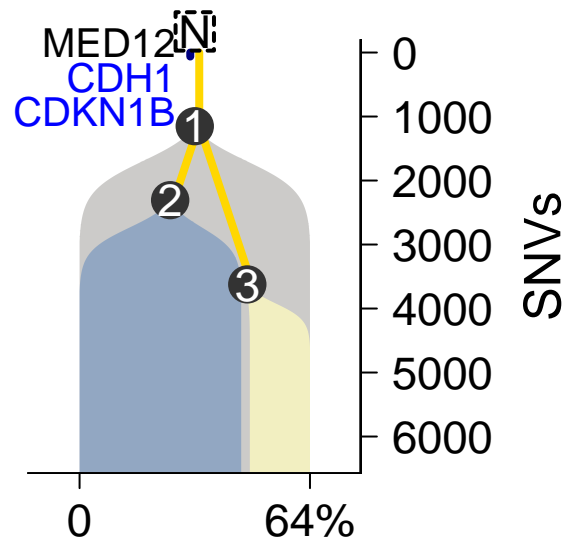

# CPCG0219

## SomaticSniper-Battenberg

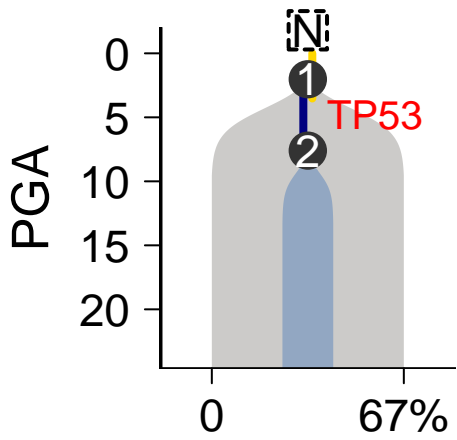

## SomaticSniper-TITAN

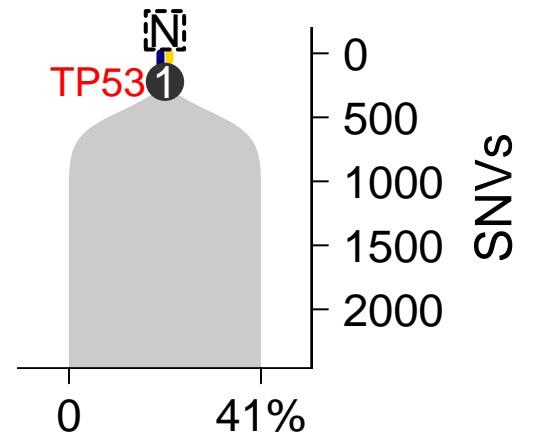

## MuTect-Battenberg

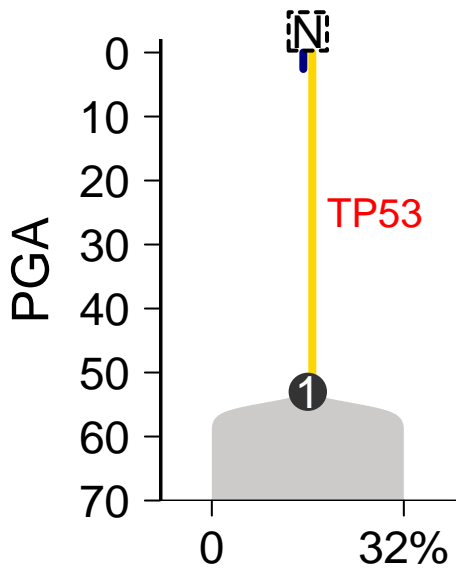

## MuTect-TITAN

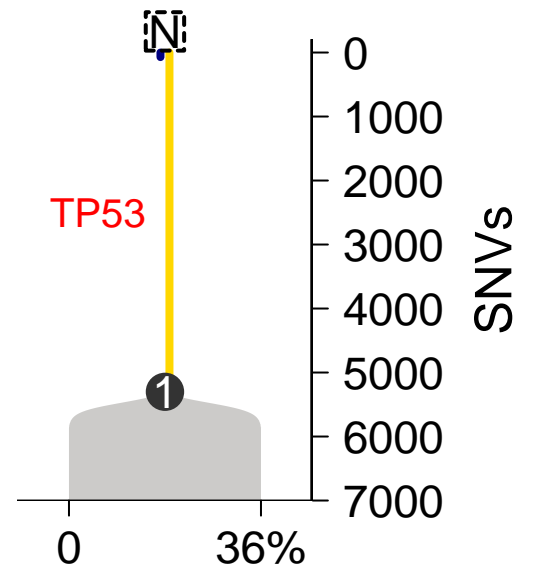

# CPCG0232

## SomaticSniper–Battenberg

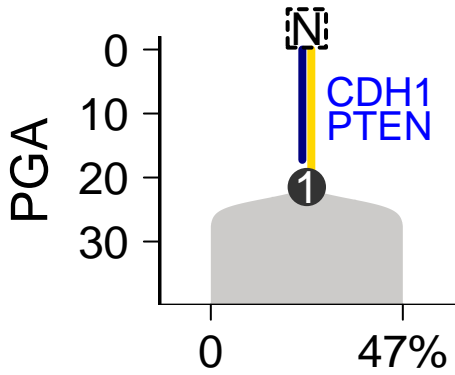

## SomaticSniper–TITAN

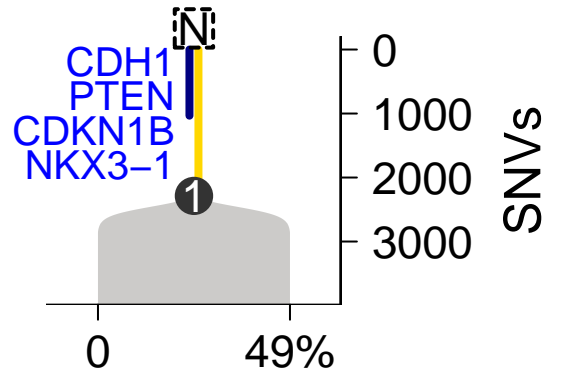

## MuTect–Battenberg

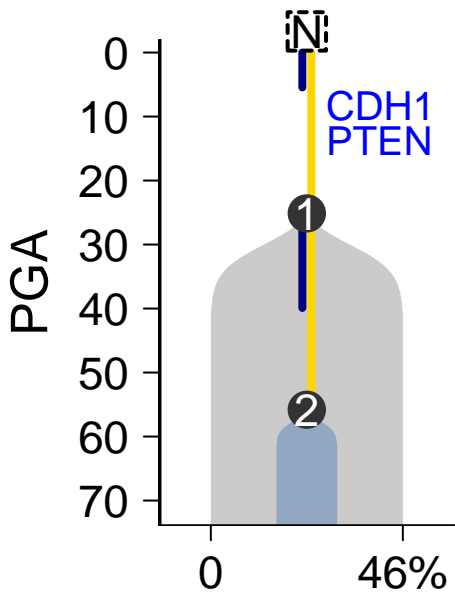

## MuTect–TITAN

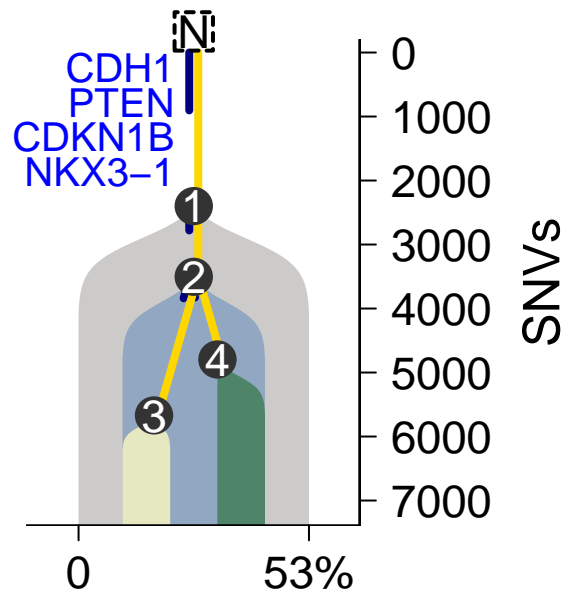

# CPCG0233

## SomaticSniper–Battenberg

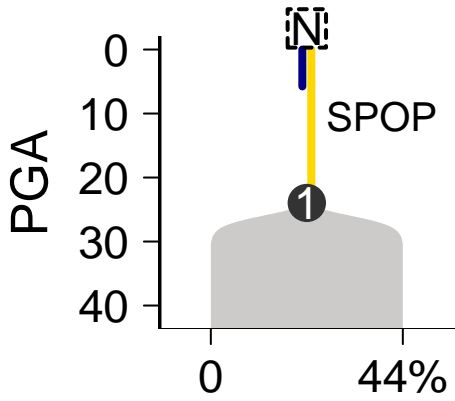

## SomaticSniper–TITAN

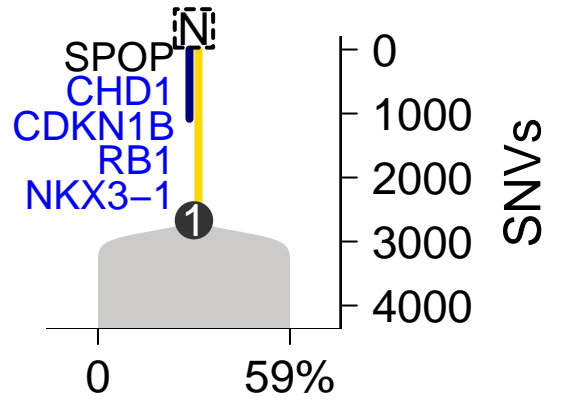

## MuTect–Battenberg

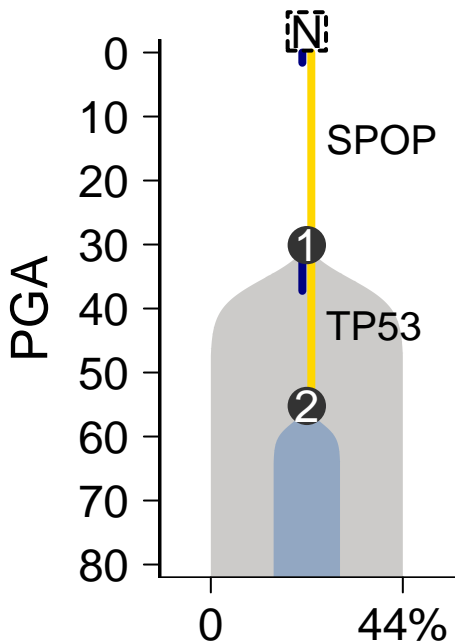

## MuTect–TITAN

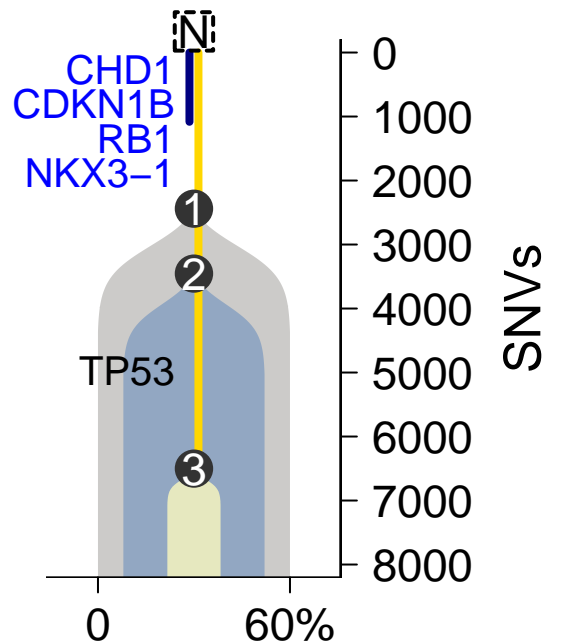

# CPCG0234

## SomaticSniper-Battenberg

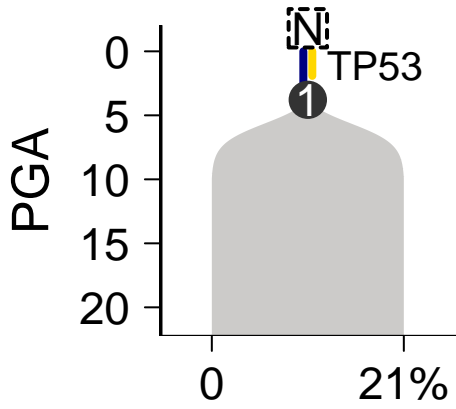

## SomaticSniper-TITAN

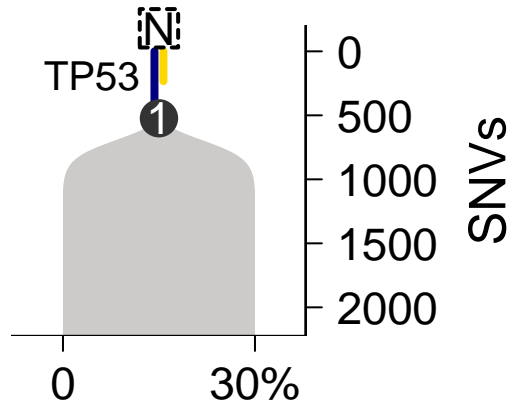

## MuTect-Battenberg

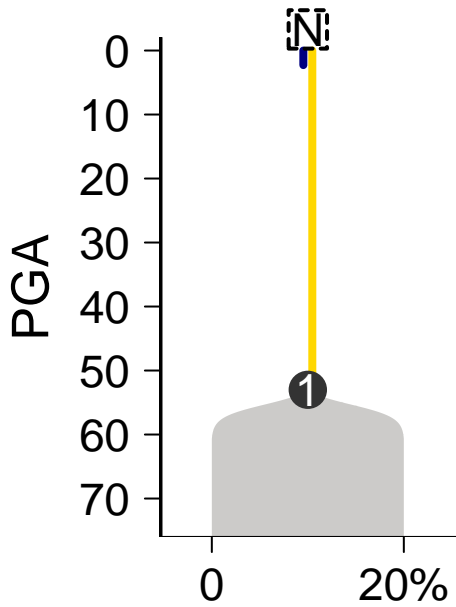

## MuTect-TITAN

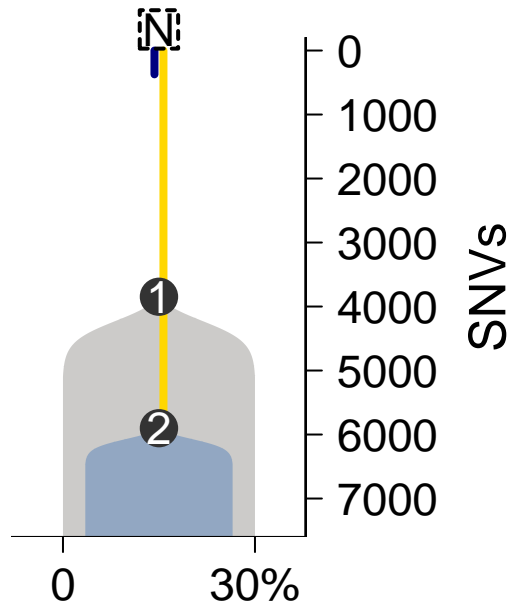

# CPCG0236

## SomaticSniper–Battenberg

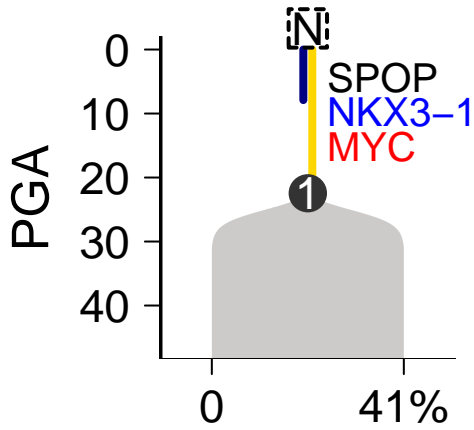

## SomaticSniper–TITAN

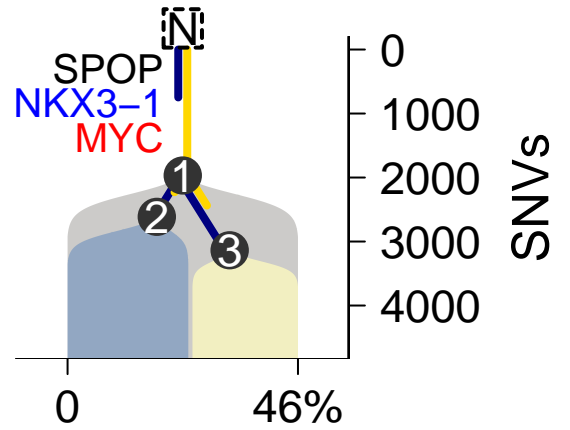

## MuTect–Battenberg

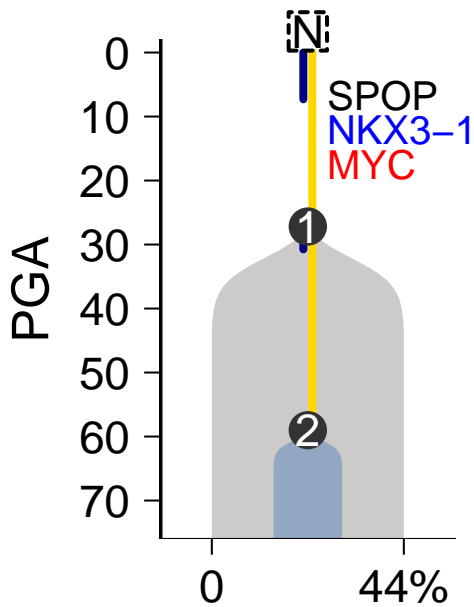

## MuTect–TITAN

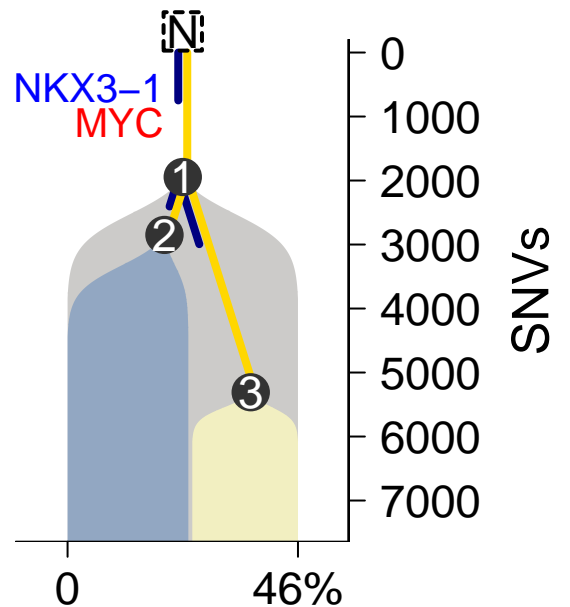

# CPCG0237

## SomaticSniper-Battenberg

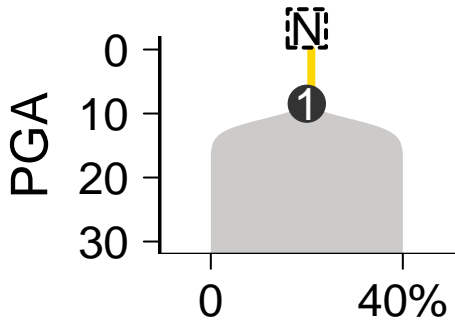

## SomaticSniper-TITAN

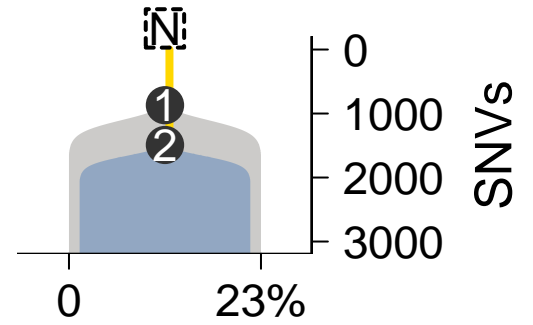

## MuTect-Battenberg

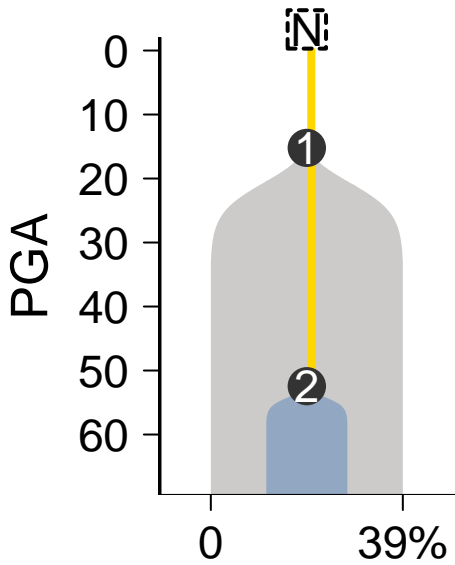

## MuTect-TITAN

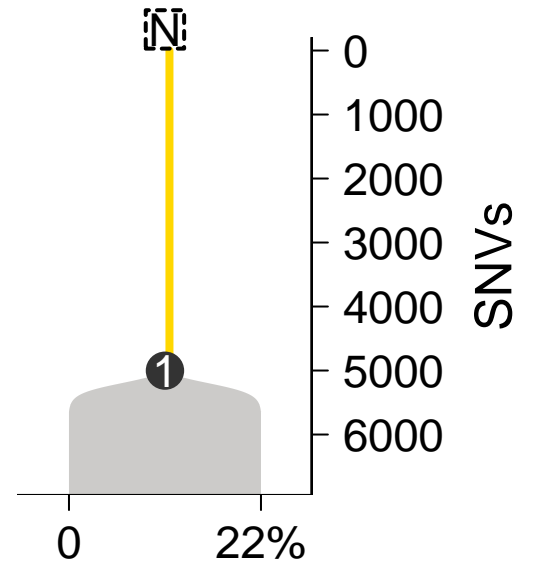

# CPCG0238

## SomaticSniper-Battenberg

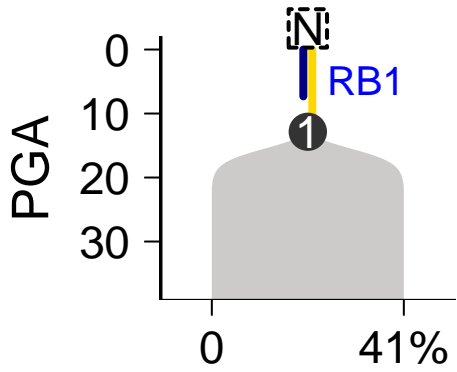

## SomaticSniper-TITAN

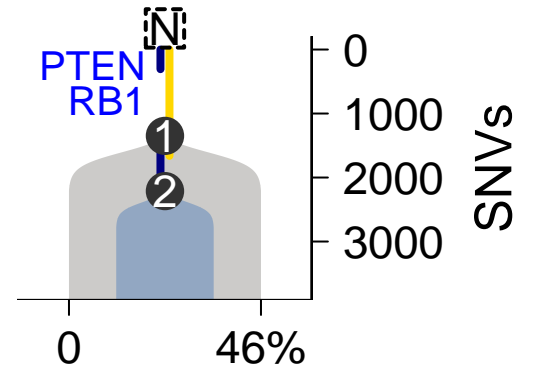

## MuTect-Battenberg

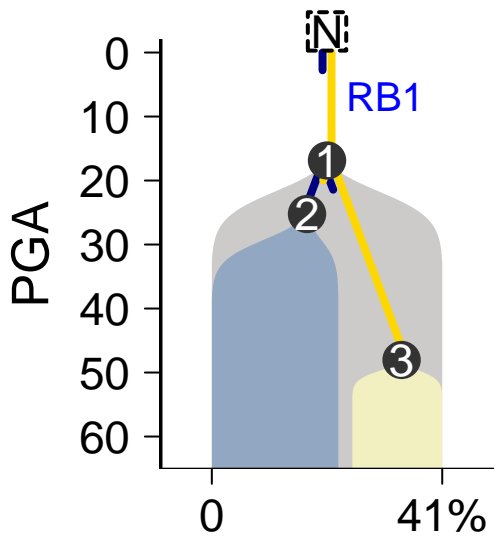

## MuTect-TITAN

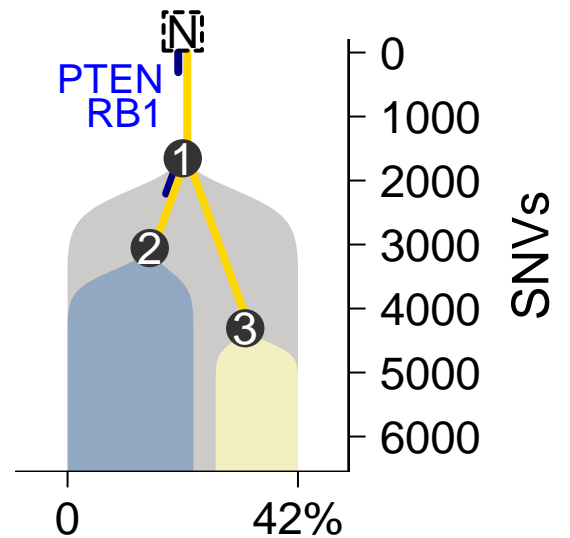



# CPCG0241

## SomaticSniper–Battenberg

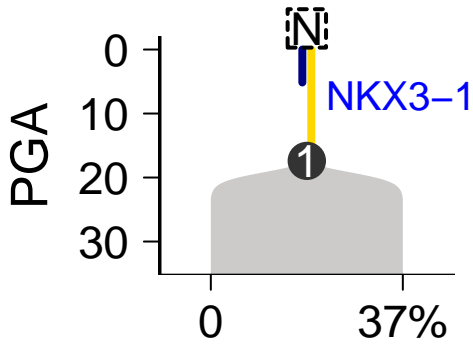

## SomaticSniper–TITAN

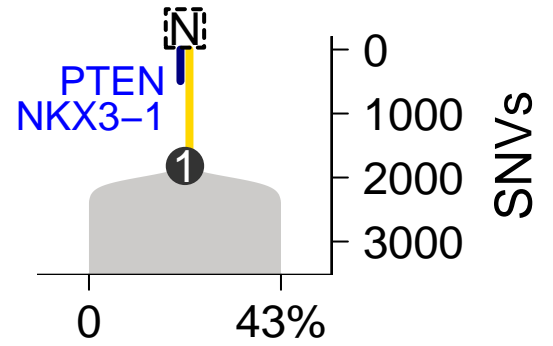

## MuTect–Battenberg

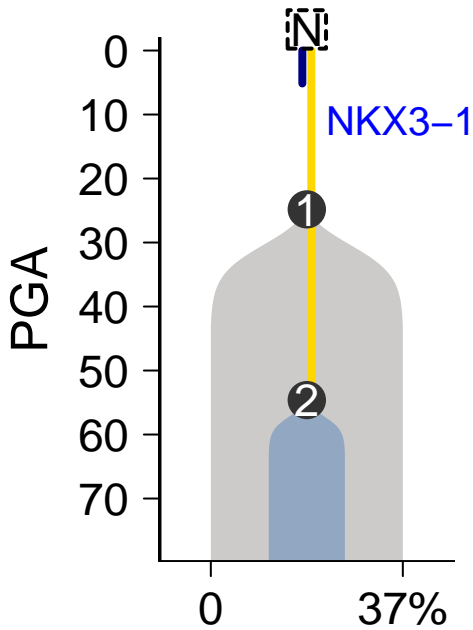

## MuTect–TITAN

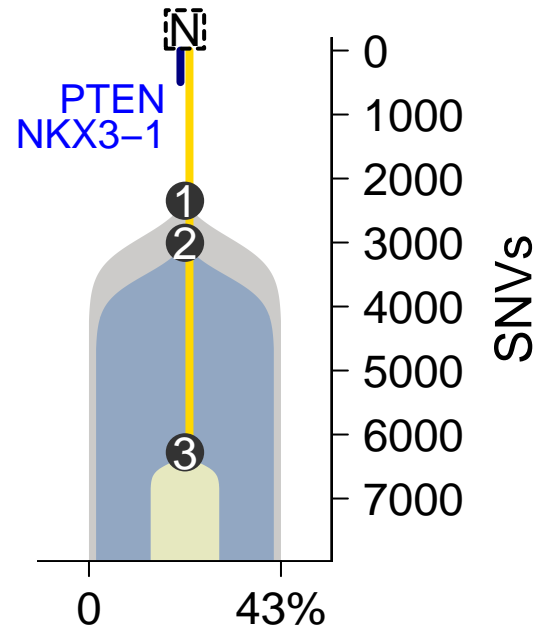

# CPCG0242

## SomaticSniper-Battenberg

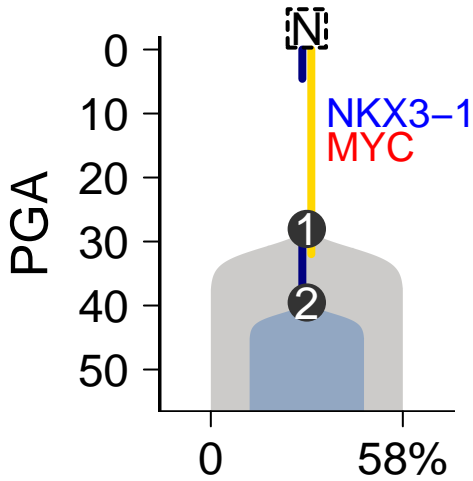

## SomaticSniper-TITAN

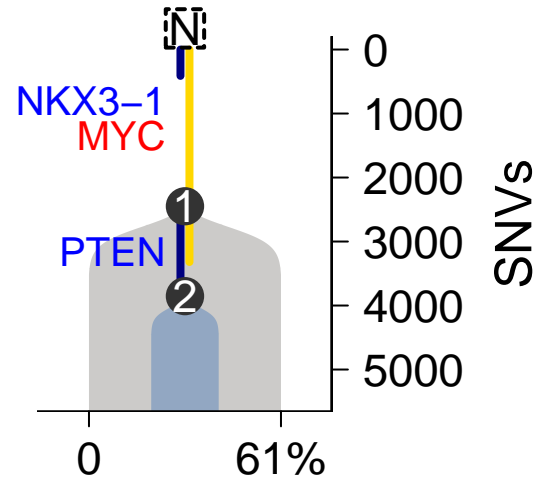

## MuTect-Battenberg

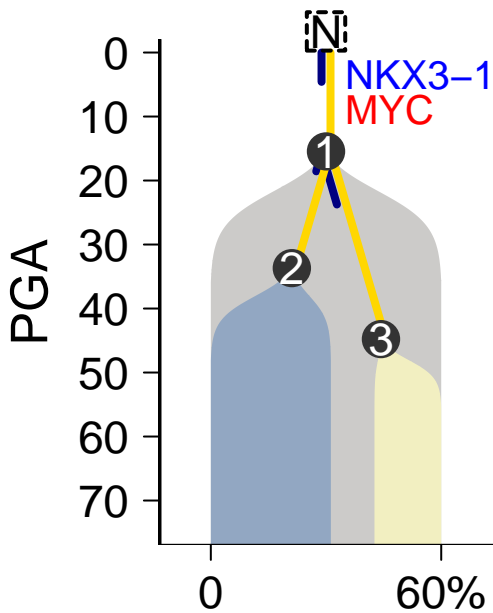

## MuTect-TITAN

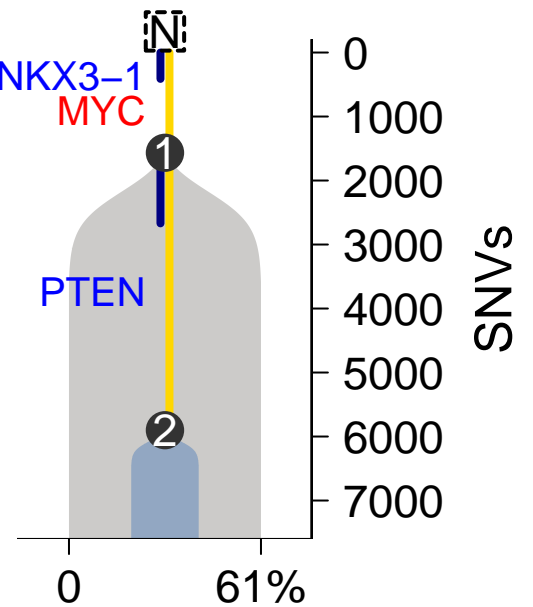

# CPCG0243

## SomaticSniper-Battenberg

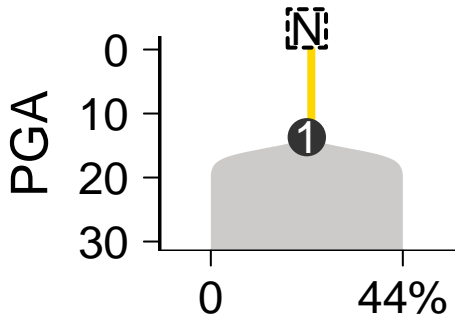

## SomaticSniper-TITAN

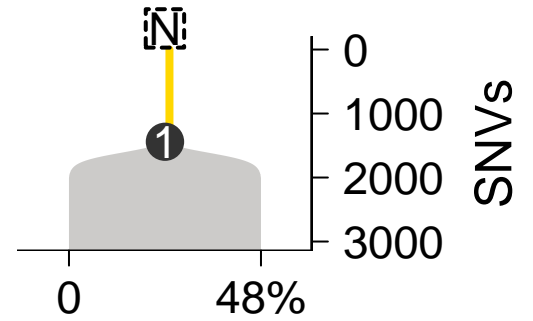

## MuTect-Battenberg

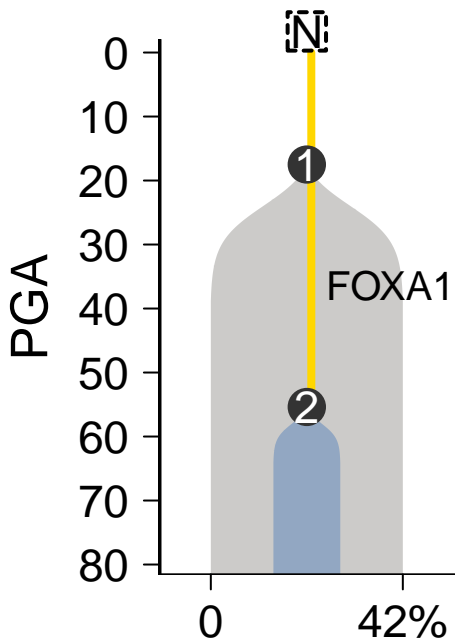

## MuTect-TITAN

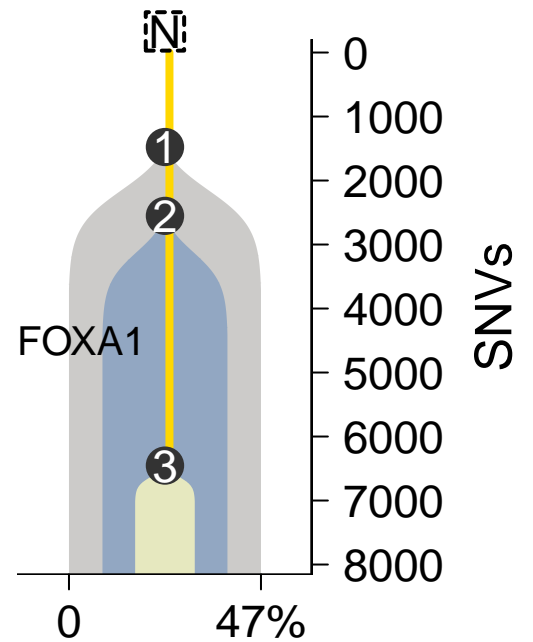

# CPCG0246

## SomaticSniper-Battenberg

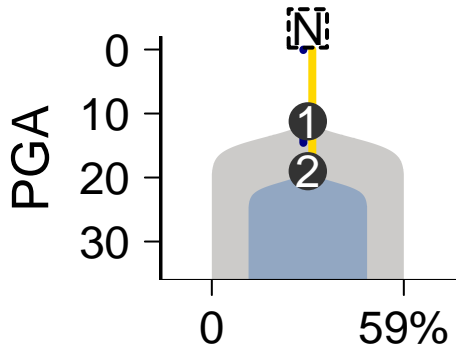

## SomaticSniper-TITAN

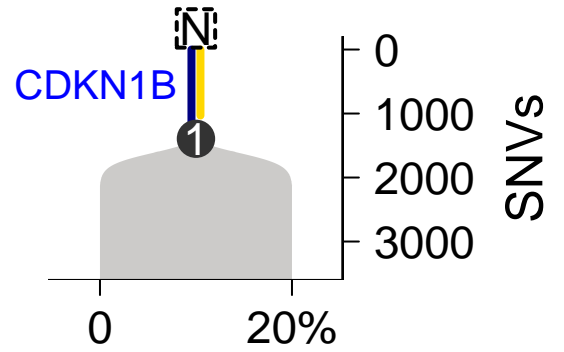

## MuTect-Battenberg

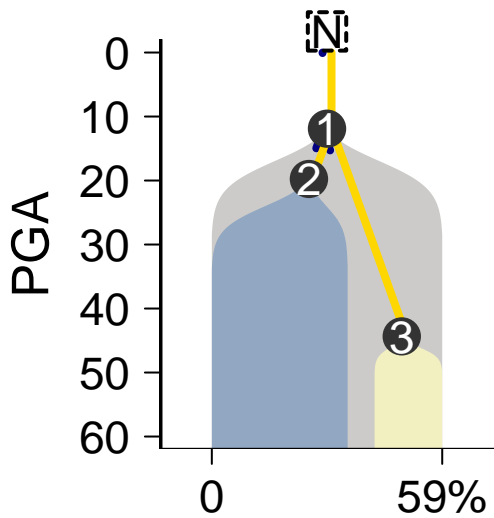

## MuTect-TITAN

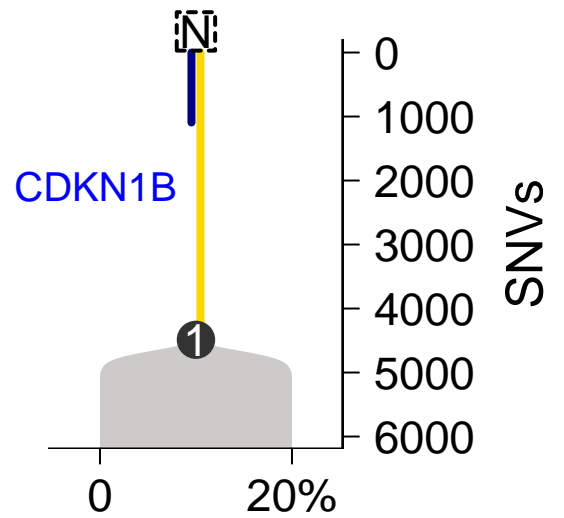

# CPCG0248

## SomaticSniper-Battenberg

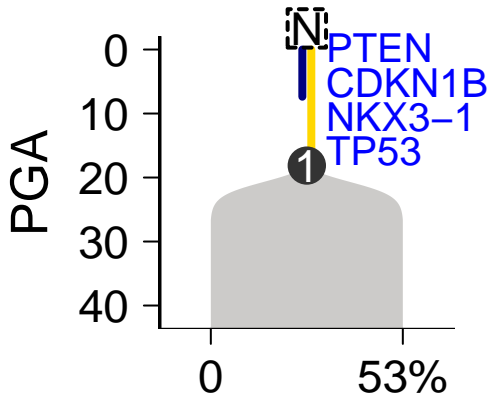

## SomaticSniper-TITAN

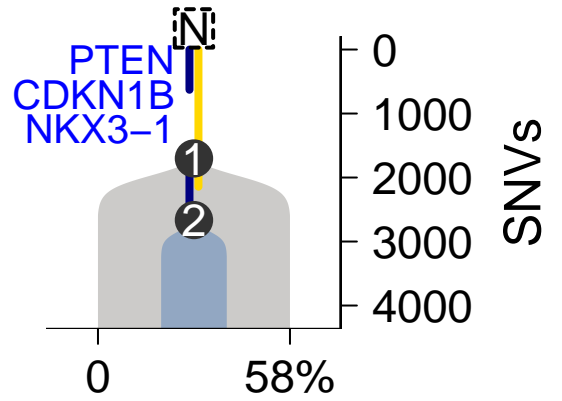

## MuTect-Battenberg

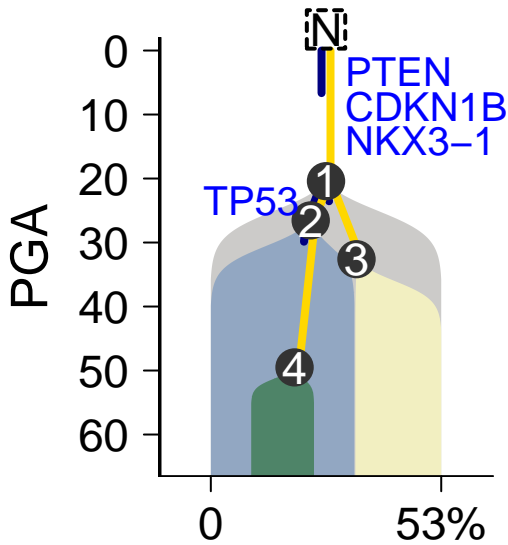

## MuTect-TITAN

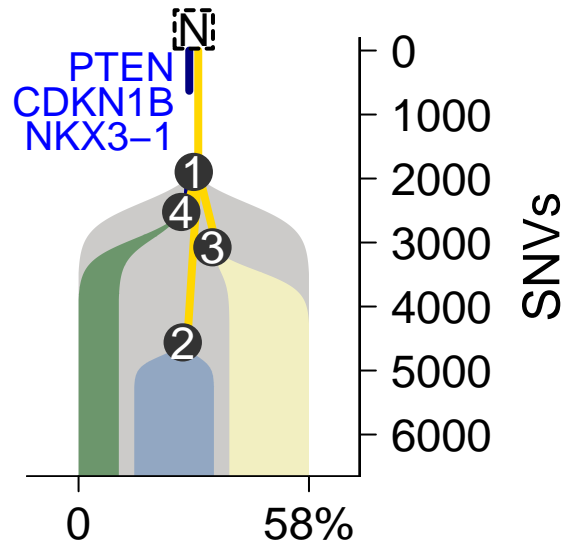

# CPCG0249

## SomaticSniper-Battenberg

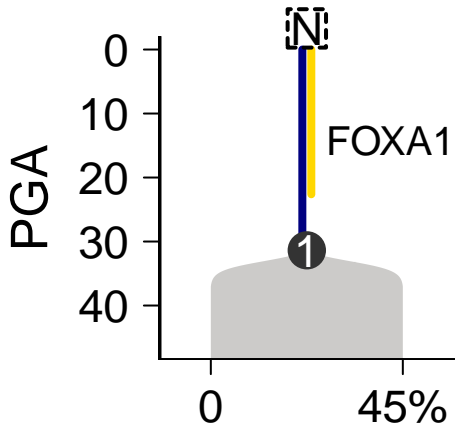

## SomaticSniper-TITAN

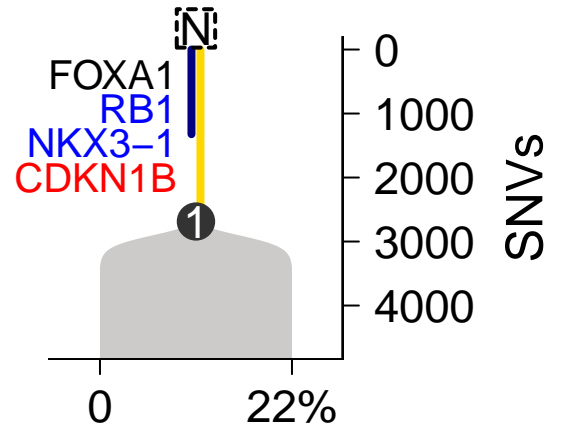

## MuTect-Battenberg

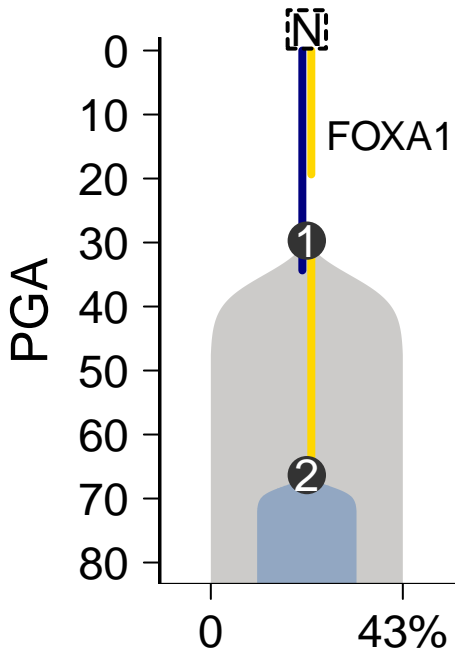

## MuTect-TITAN

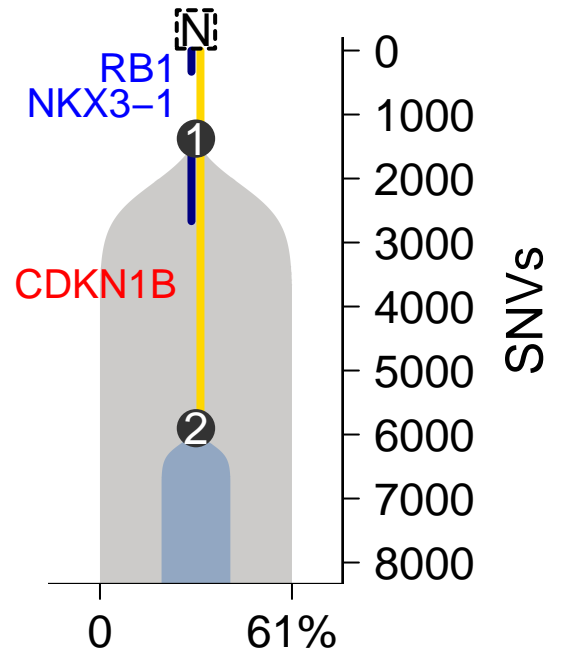

# CPCG0250

## SomaticSniper-Battenberg

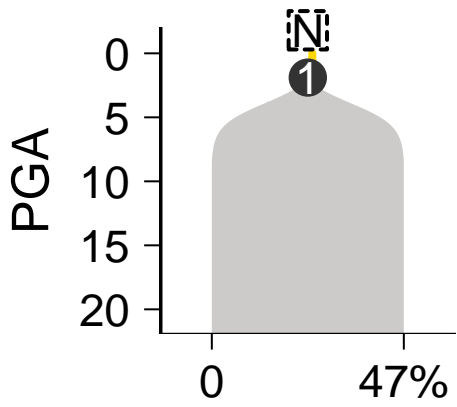

## SomaticSniper-TITAN

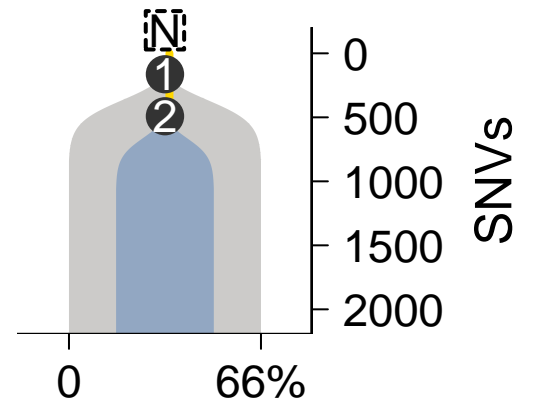

## MuTect-Battenberg

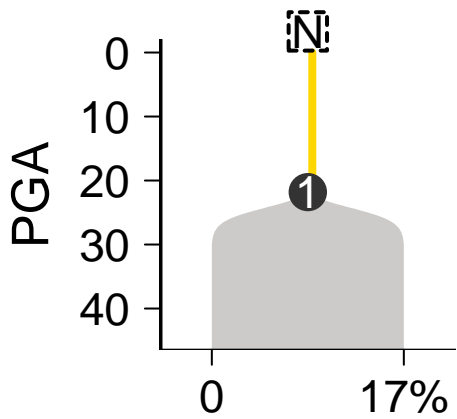

## MuTect-TITAN

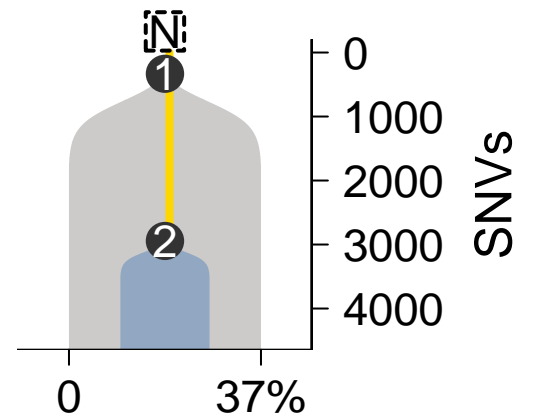

# CPCG0251

## SomaticSniper-Battenberg

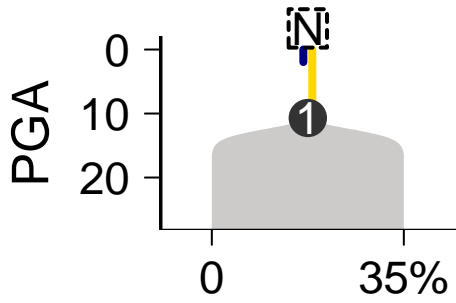

## SomaticSniper-TITAN

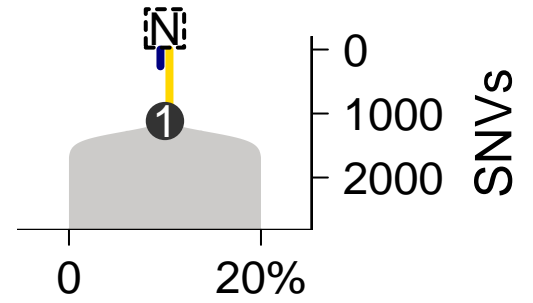

## MuTect-Battenberg

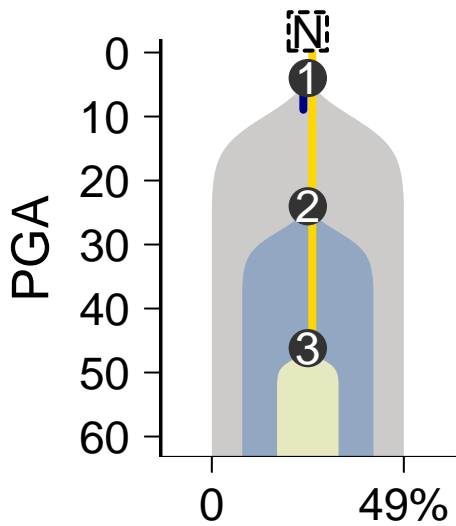

## MuTect-TITAN

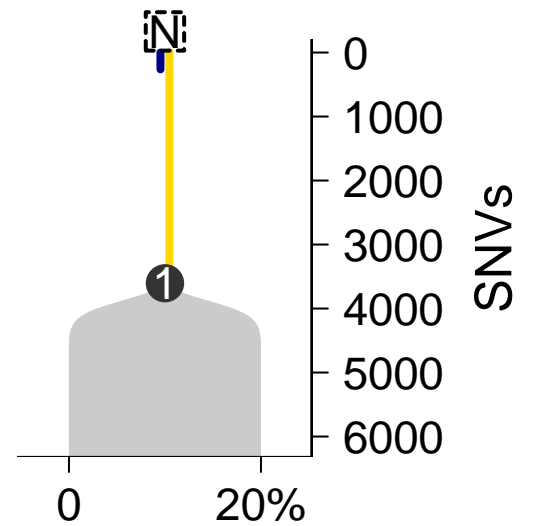



# CPCG0255

## SomaticSniper-Battenberg

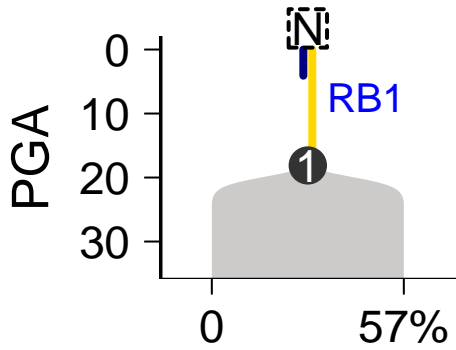

## SomaticSniper-TITAN

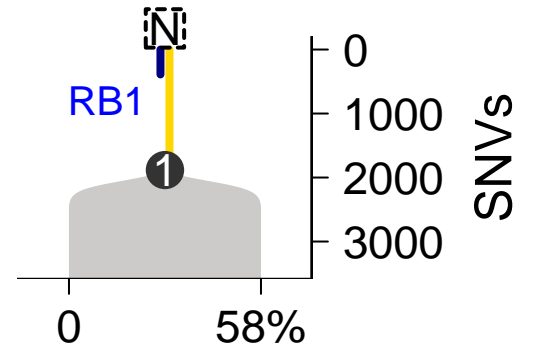

## MuTect-Battenberg

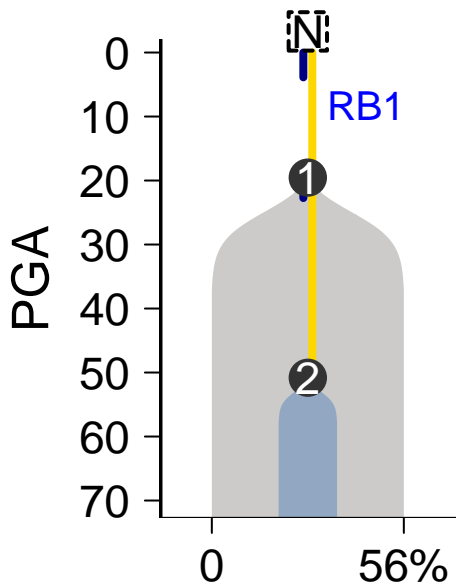

## MuTect-TITAN

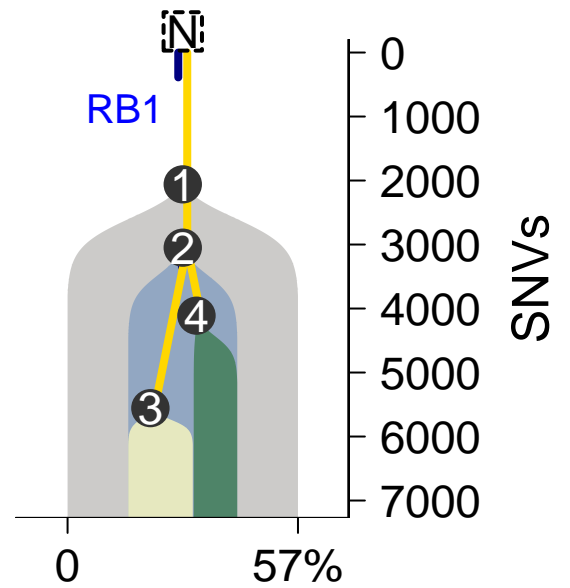

# CPCG0256

## SomaticSniper-Battenberg

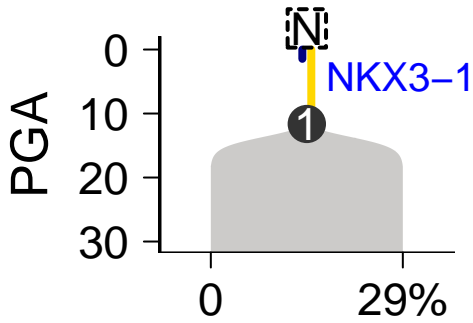

## SomaticSniper-TITAN

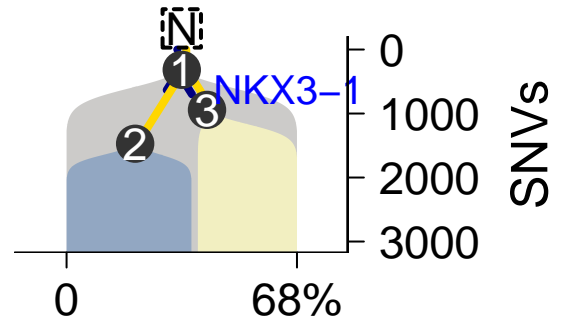

## MuTect-Battenberg

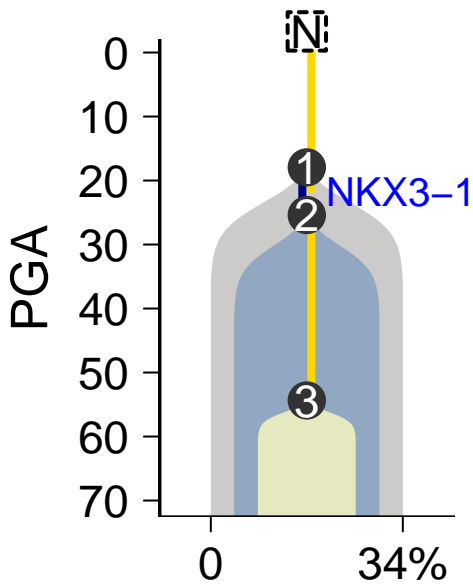

## MuTect-TITAN

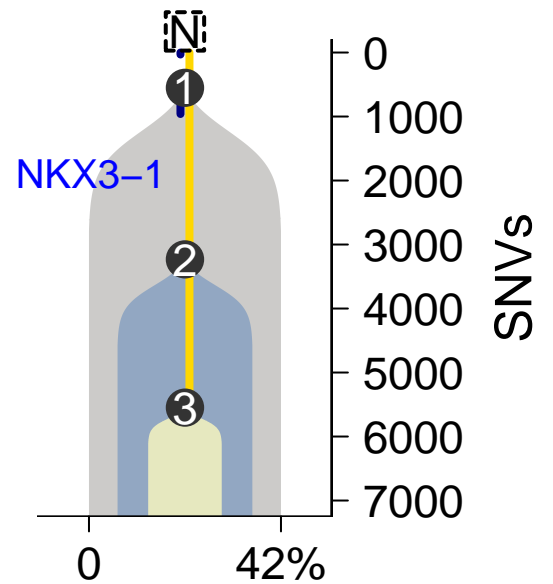

# CPCG0258

## SomaticSniper-Battenberg

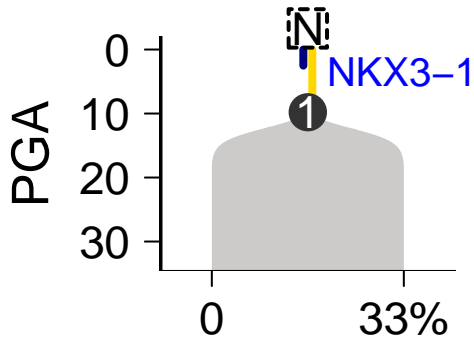

## SomaticSniper-TITAN

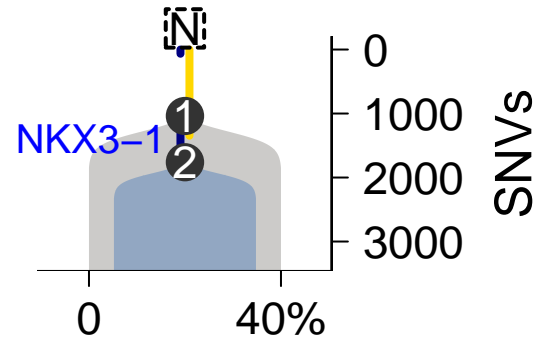

## MuTect-Battenberg

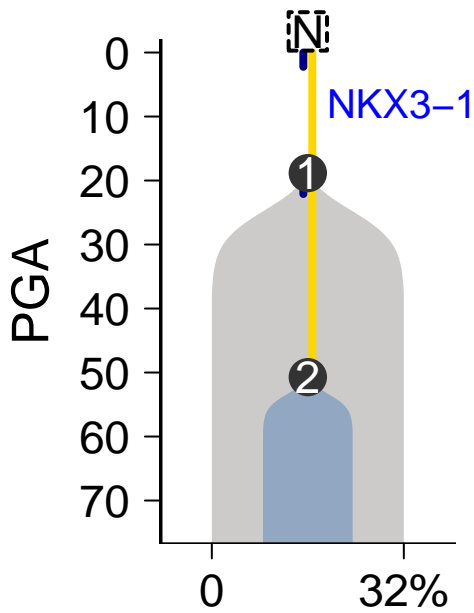

## MuTect-TITAN

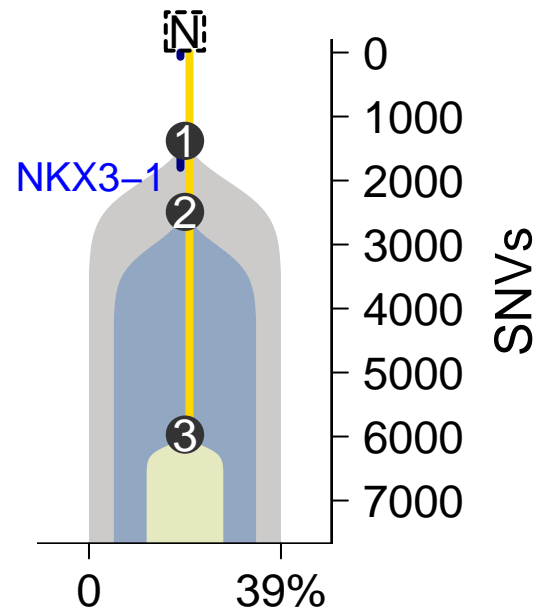

# CPCG0259

## SomaticSniper-Battenberg

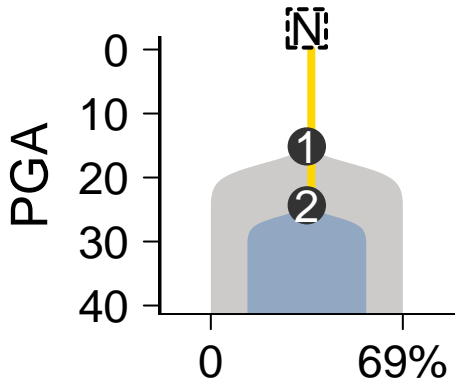

## SomaticSniper-TITAN

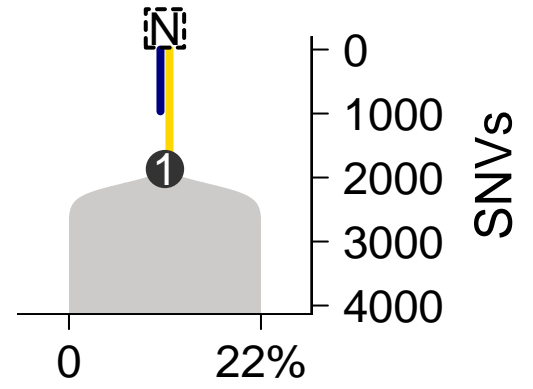

## MuTect-Battenberg

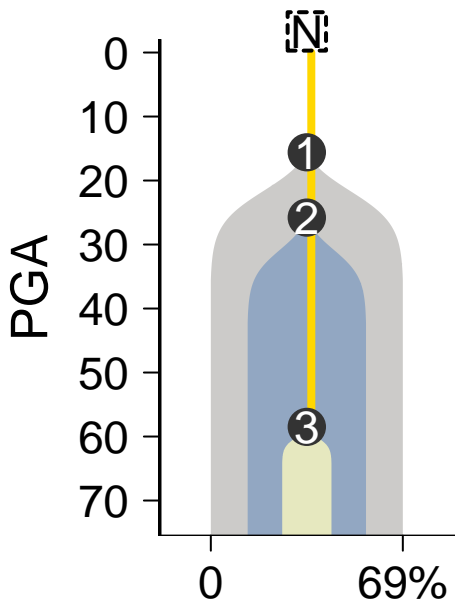

## MuTect-TITAN

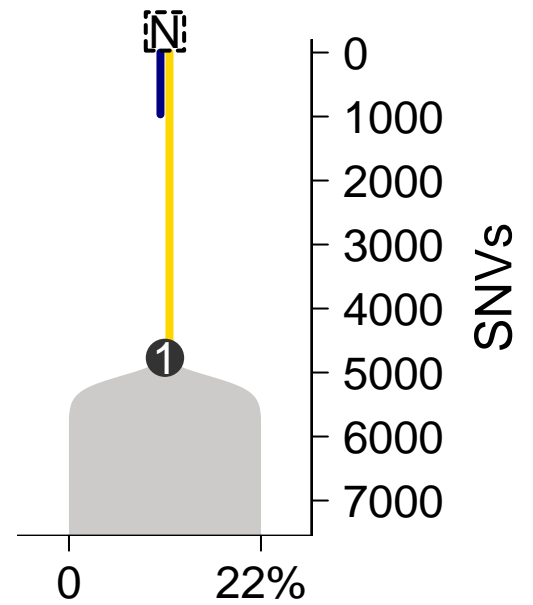

# CPCG0260

## SomaticSniper–Battenberg

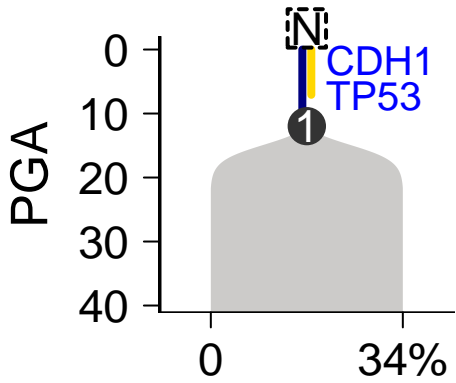

## SomaticSniper–TITAN

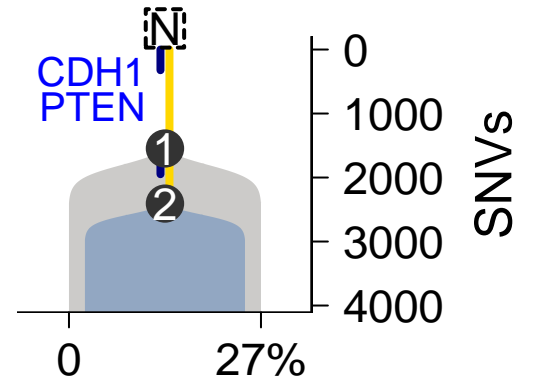

## MuTect–Battenberg

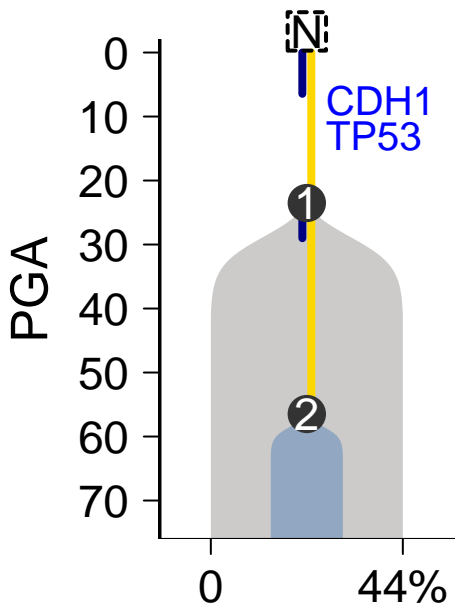

## MuTect–TITAN

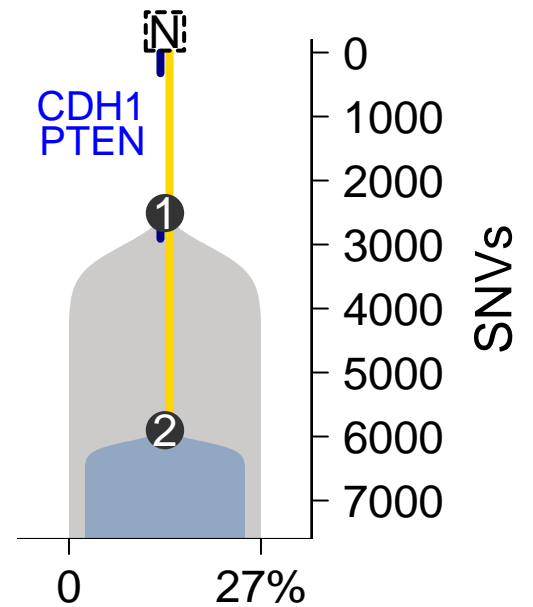

# CPCG0262

## SomaticSniper-Battenberg

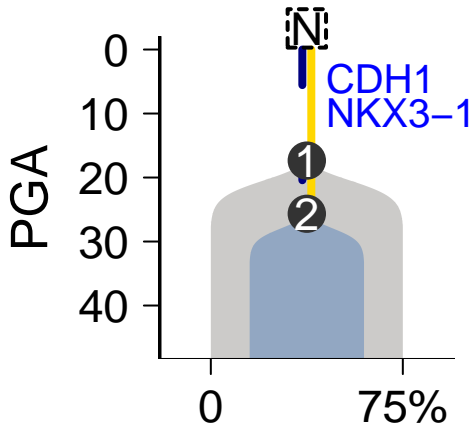

## SomaticSniper-TITAN

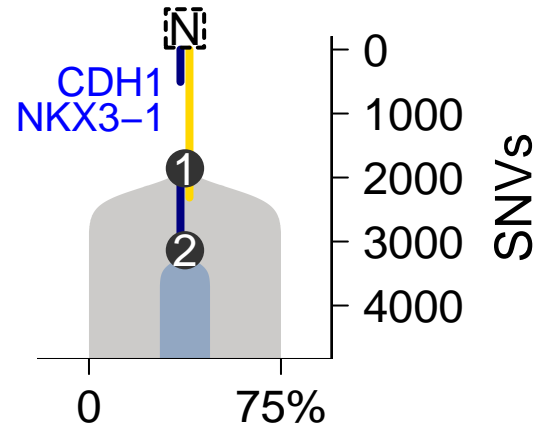

## MuTect-Battenberg

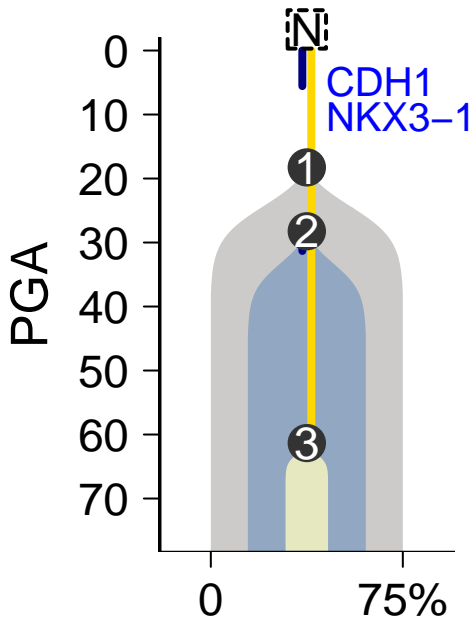

## MuTect-TITAN

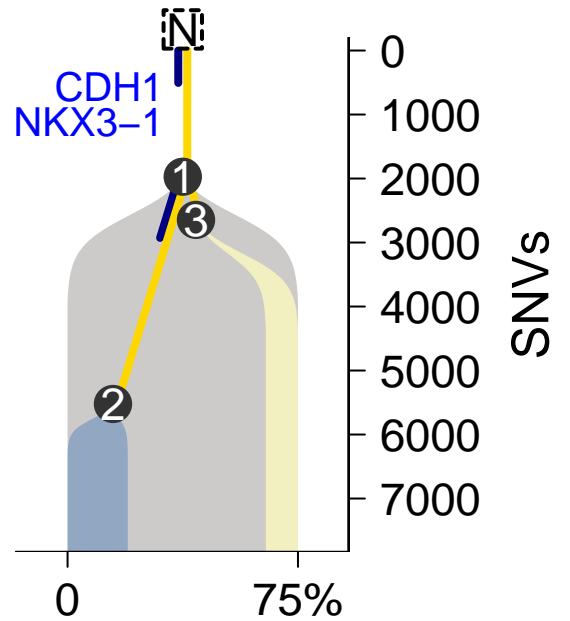

# CPCG0263

## SomaticSniper-Battenberg

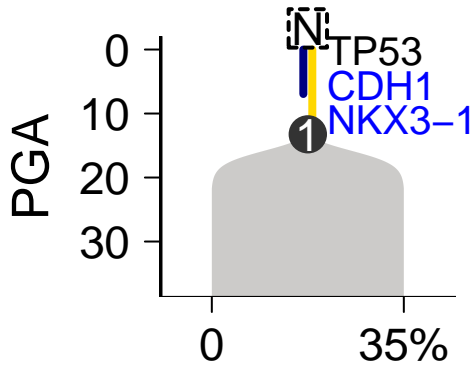

## SomaticSniper-TITAN

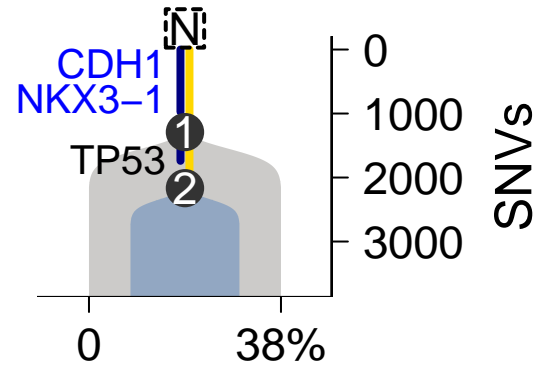

## MuTect-Battenberg

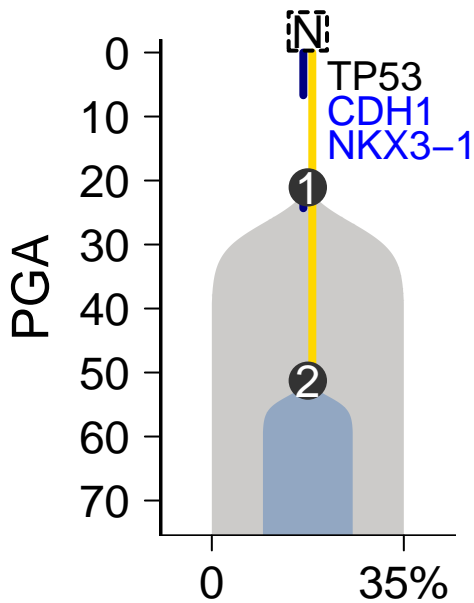

## MuTect-TITAN

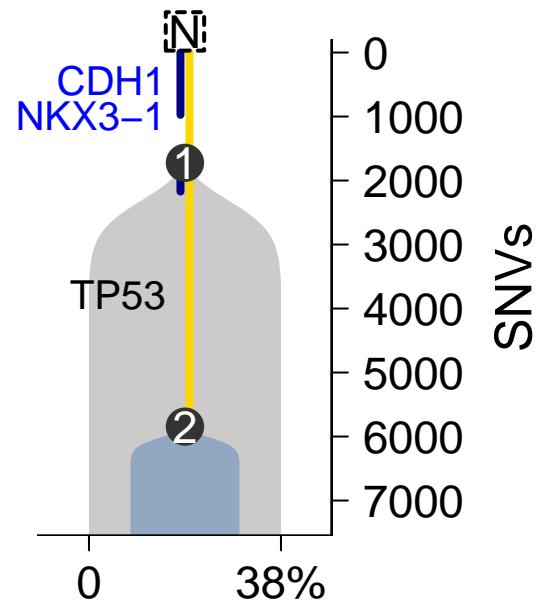

# CPCG0265

## SomaticSniper-Battenberg

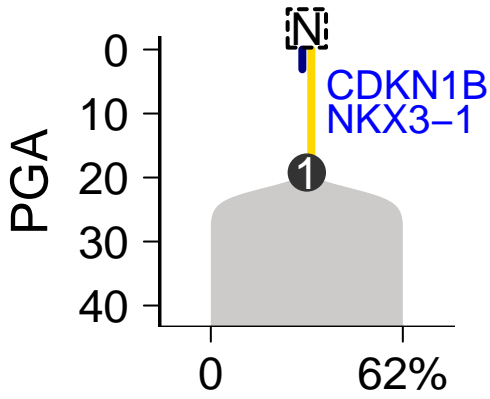

## SomaticSniper-TITAN

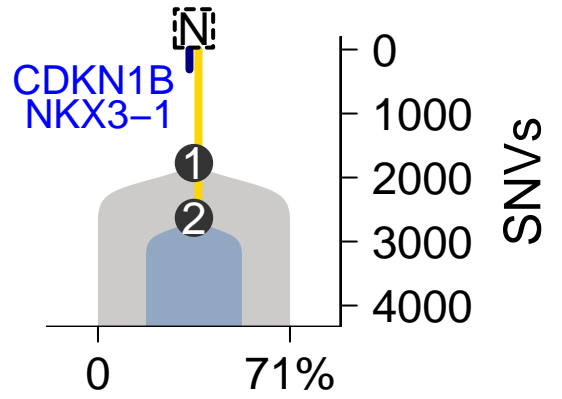

## MuTect-Battenberg

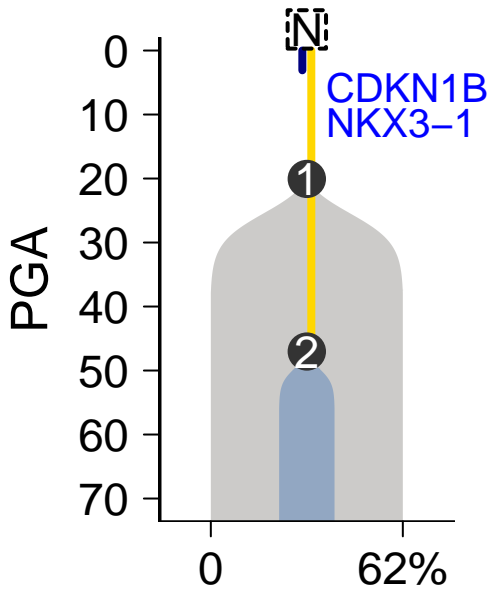

## MuTect-TITAN

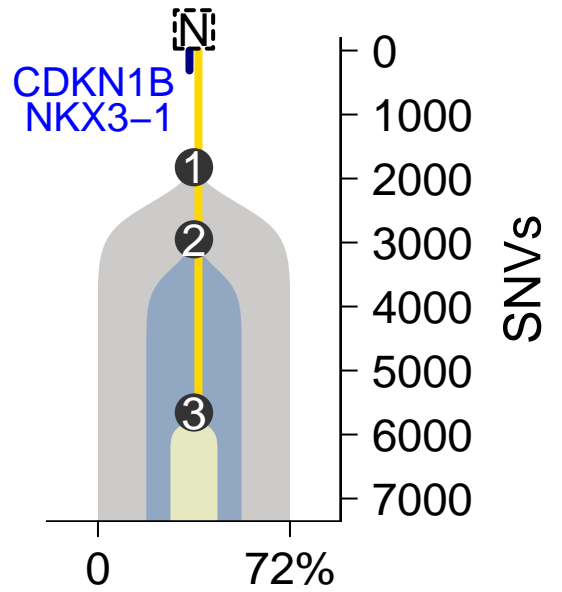



# CPCG0266

## SomaticSniper-Battenberg

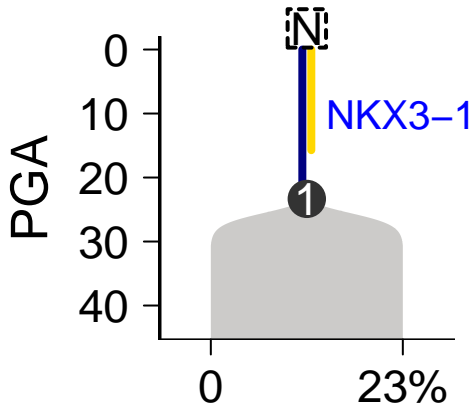

## SomaticSniper-TITAN

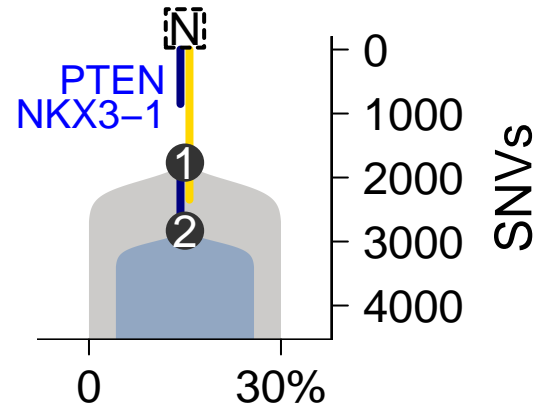

## MuTect-Battenberg

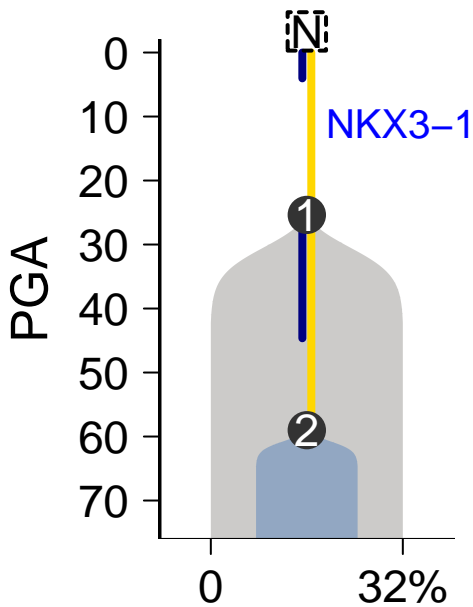

## MuTect-TITAN

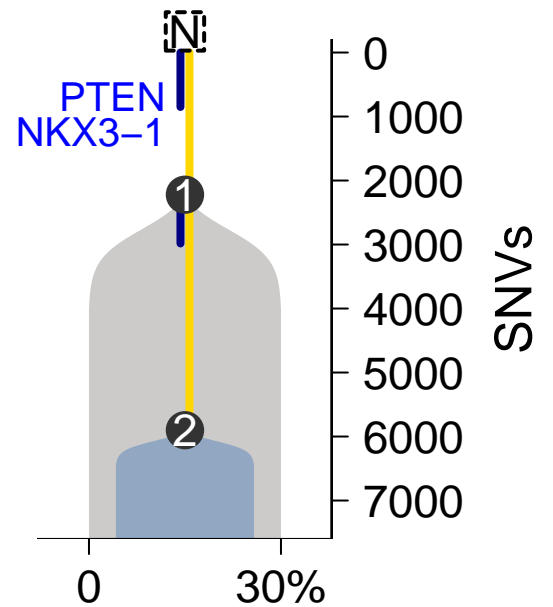

# CPCG0267

## SomaticSniper-Battenberg

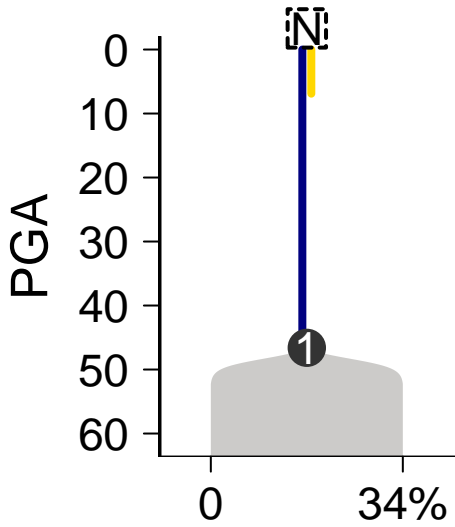

## SomaticSniper-TITAN

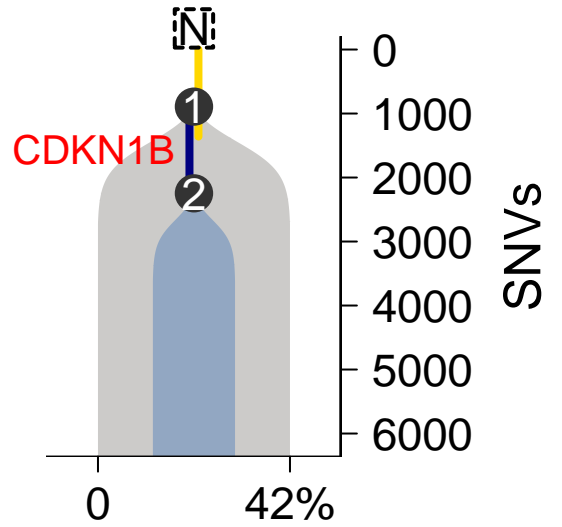

## MuTect-Battenberg

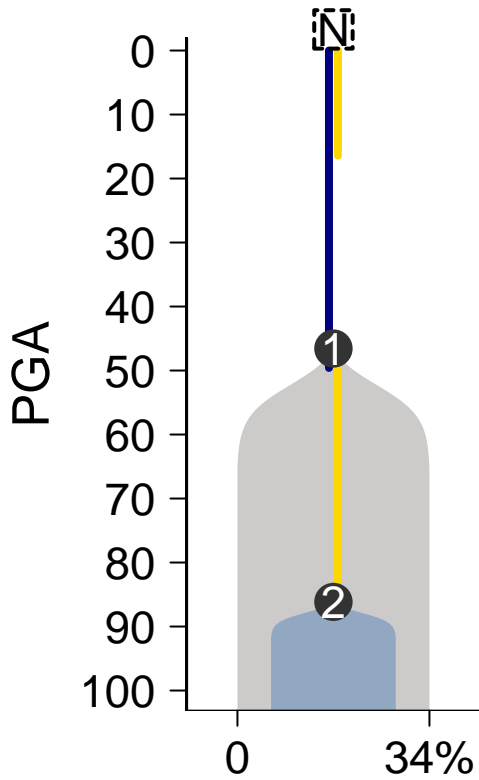

## MuTect-TITAN

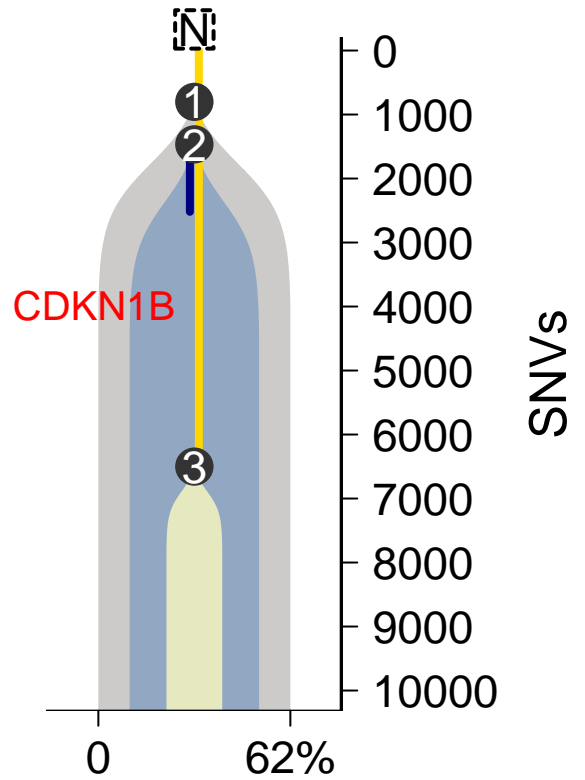

# CPCG0268

## SomaticSniper–Battenberg

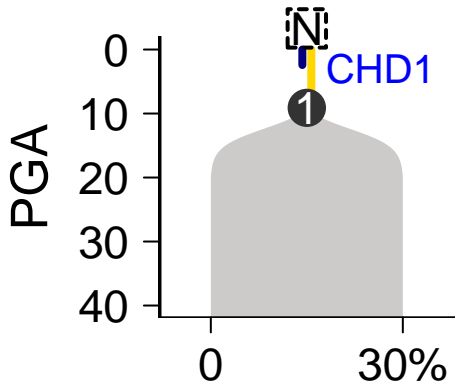

## SomaticSniper–TITAN

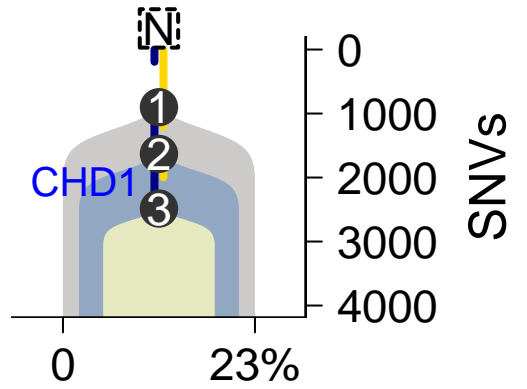

## MuTect–Battenberg

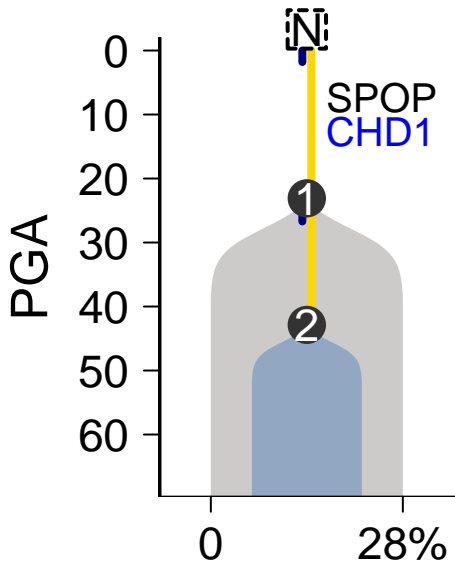

## MuTect–TITAN

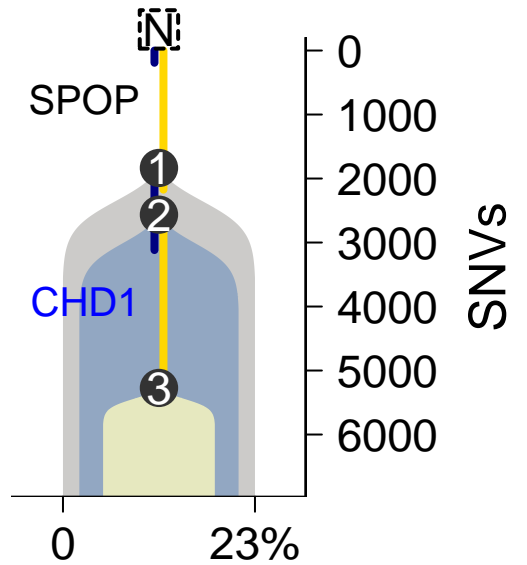

# CPCG0269

## SomaticSniper-Battenberg

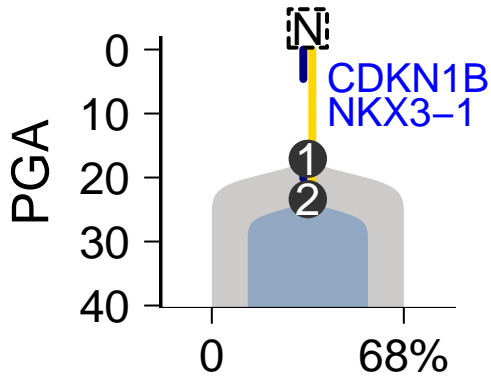

## SomaticSniper-TITAN

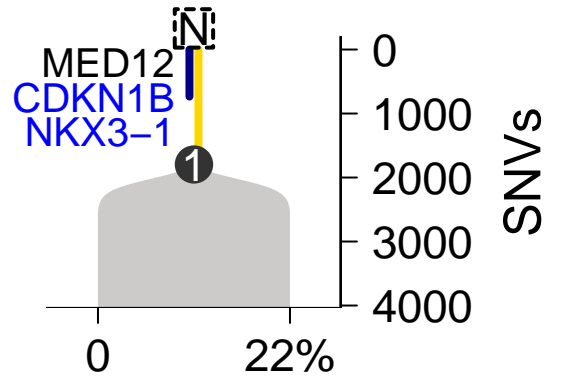

## MuTect-Battenberg

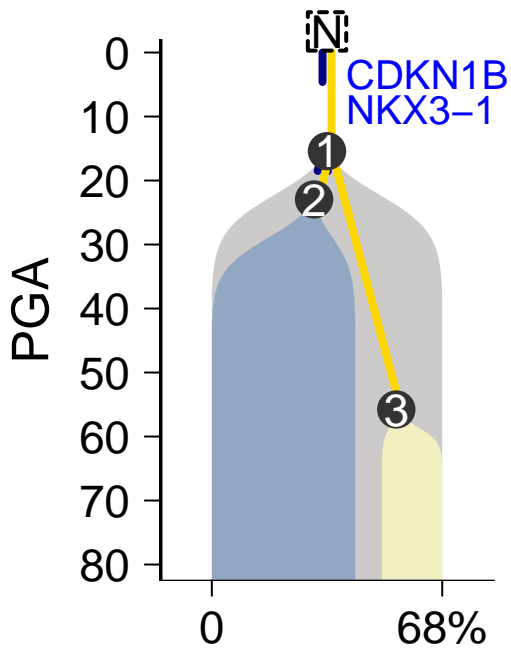

## MuTect-TITAN

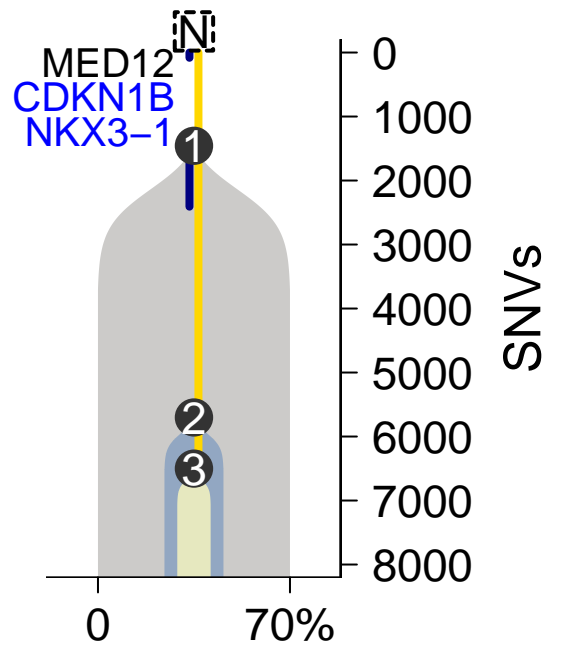

# CPCG0274

## SomaticSniper-Battenberg

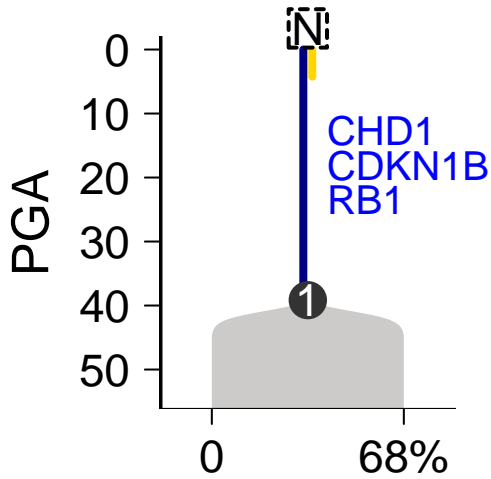

## SomaticSniper-TITAN

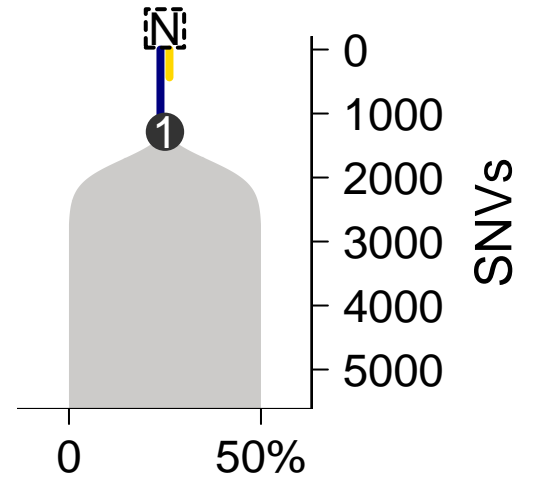

## MuTect-Battenberg

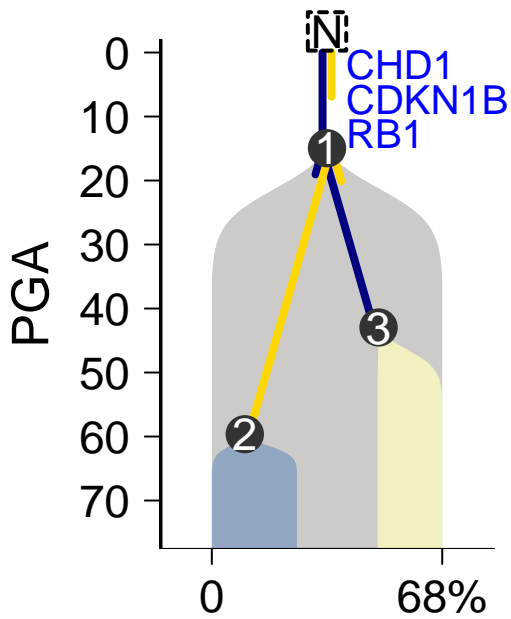

## MuTect-TITAN

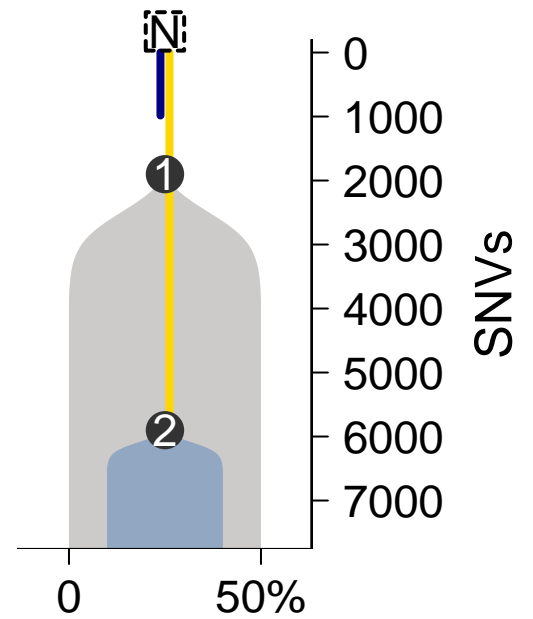

# CPCG0324

## SomaticSniper–Battenberg

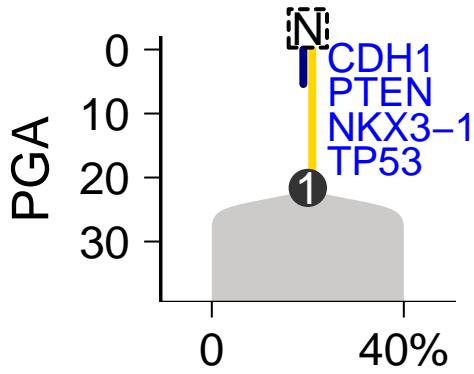

## SomaticSniper–TITAN

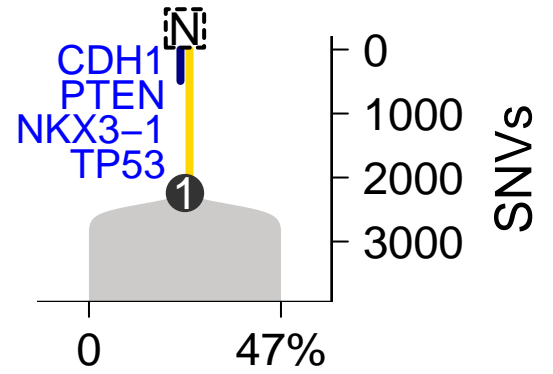

## MuTect–Battenberg

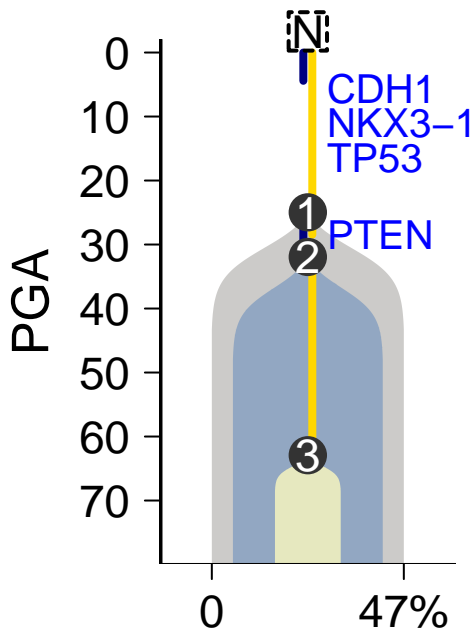

## MuTect–TITAN

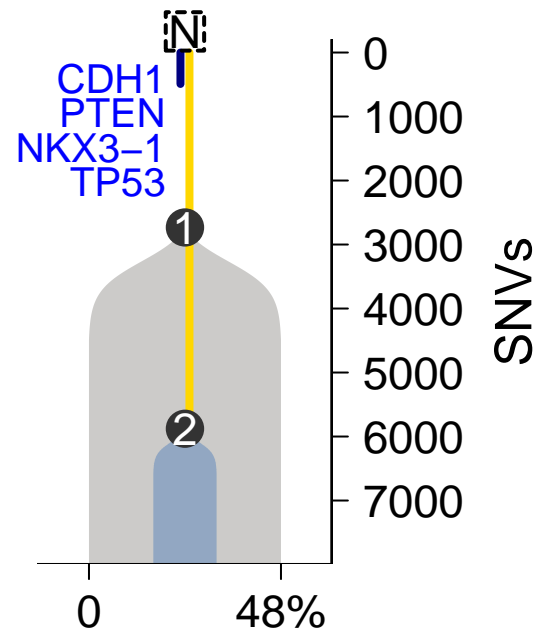

# CPCG0331

## SomaticSniper-Battenberg

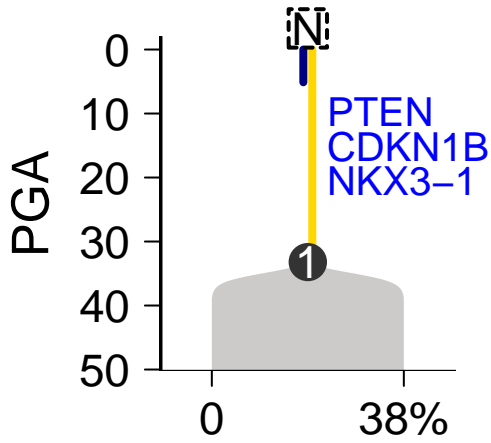

## SomaticSniper-TITAN

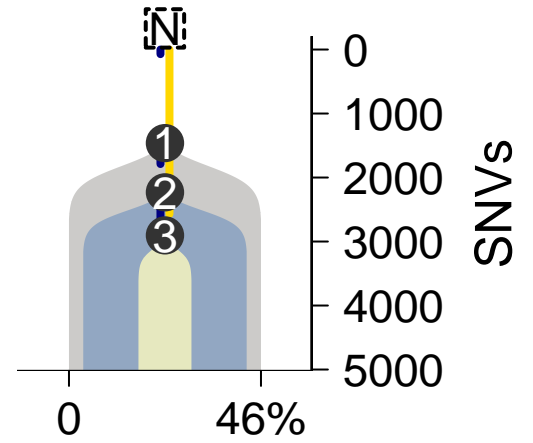

## MuTect-Battenberg

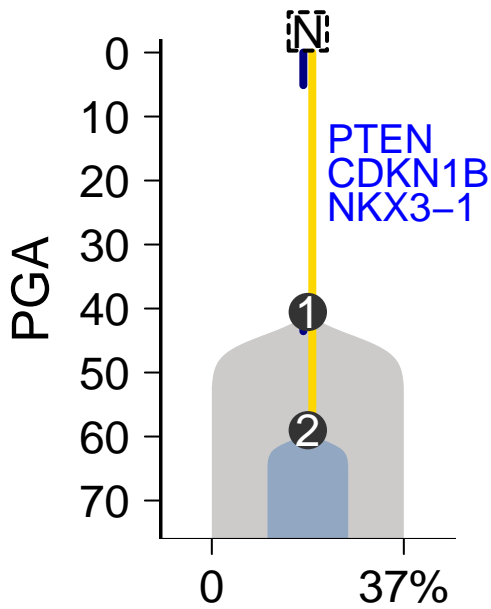

## MuTect-TITAN

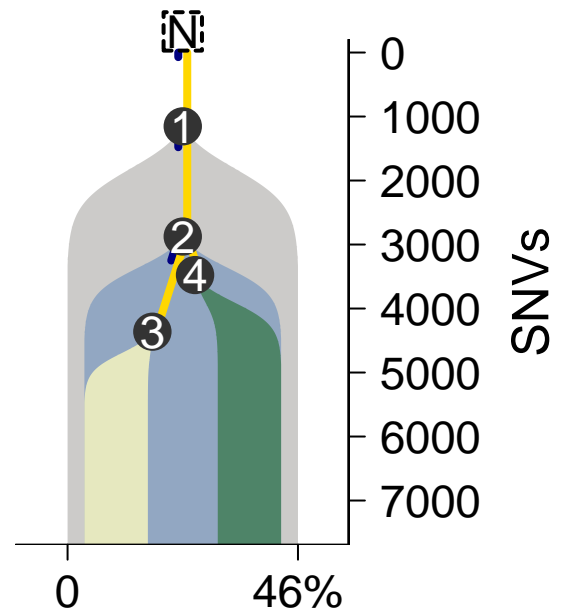

# CPCG0334

## SomaticSniper–Battenberg

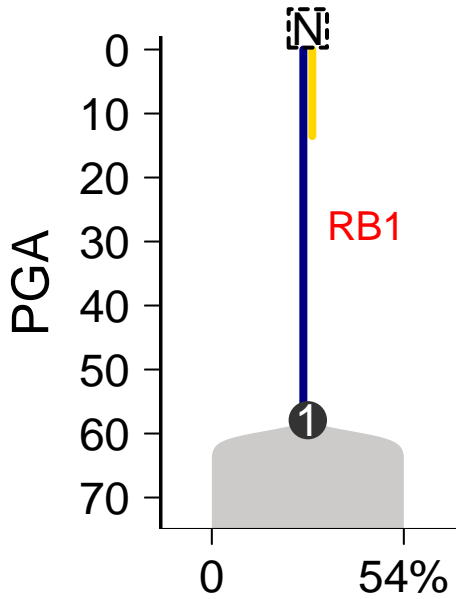

## SomaticSniper–TITAN

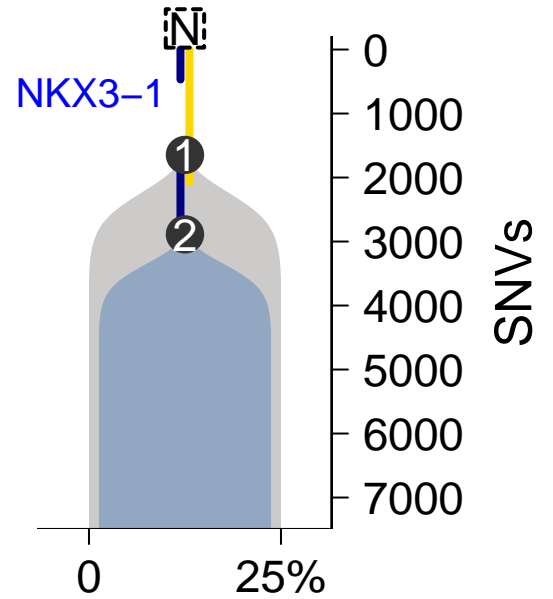

## MuTect–Battenberg

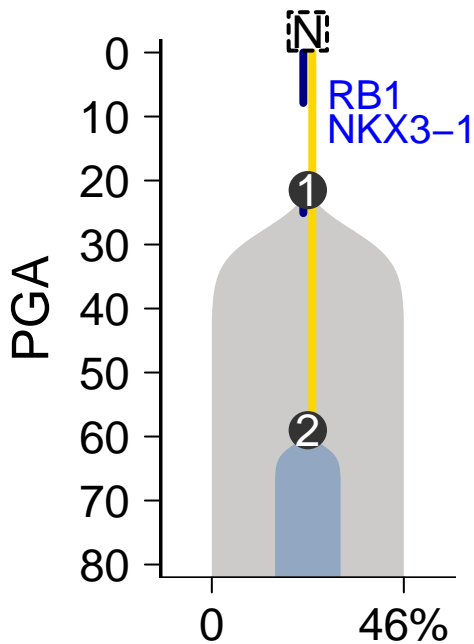

## MuTect–TITAN

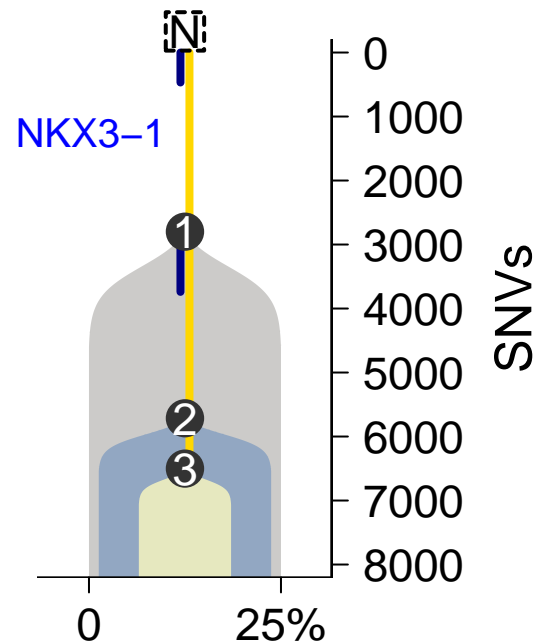



# CPCG0336

## SomaticSniper-Battenberg

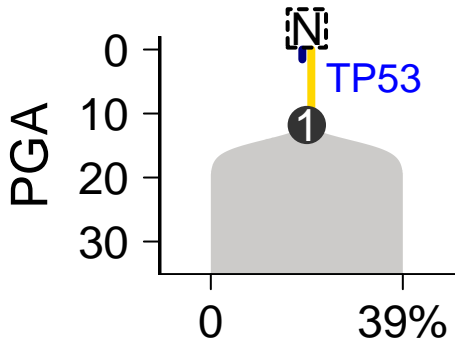

## SomaticSniper-TITAN

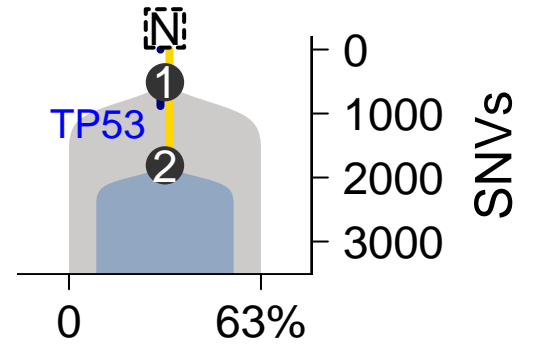

## MuTect-Battenberg

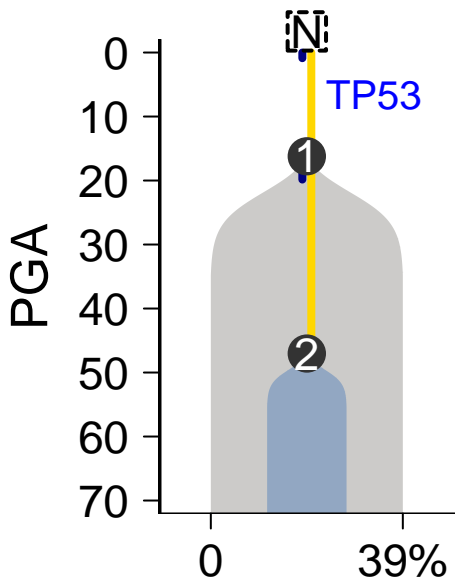

## MuTect-TITAN

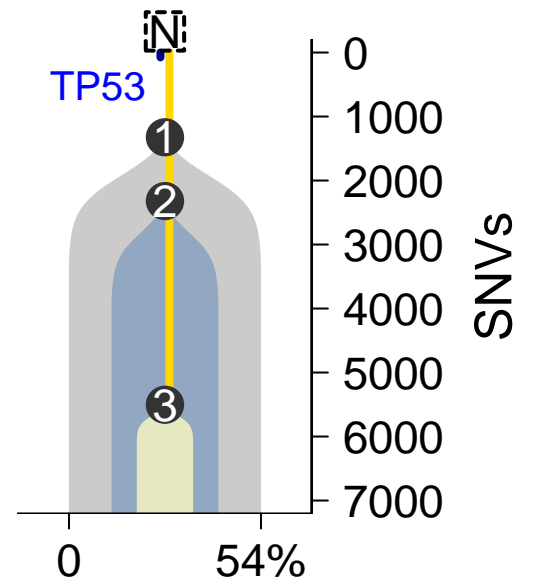

# CPCG0339

## SomaticSniper-Battenberg

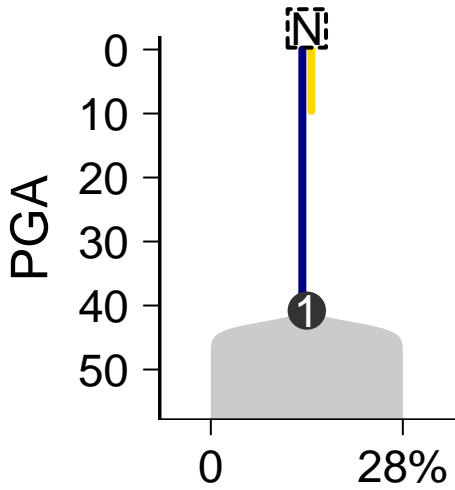

## SomaticSniper-TITAN

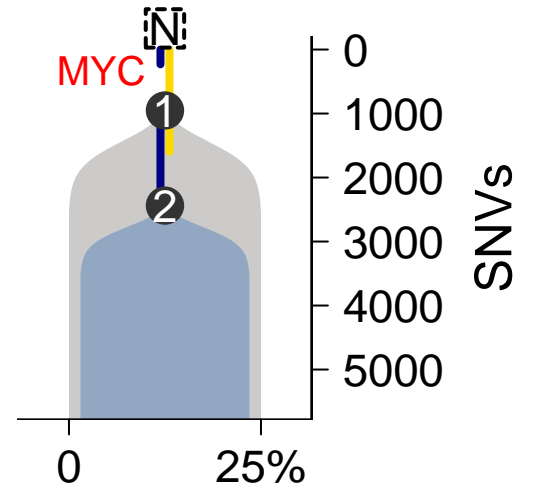

## MuTect-Battenberg

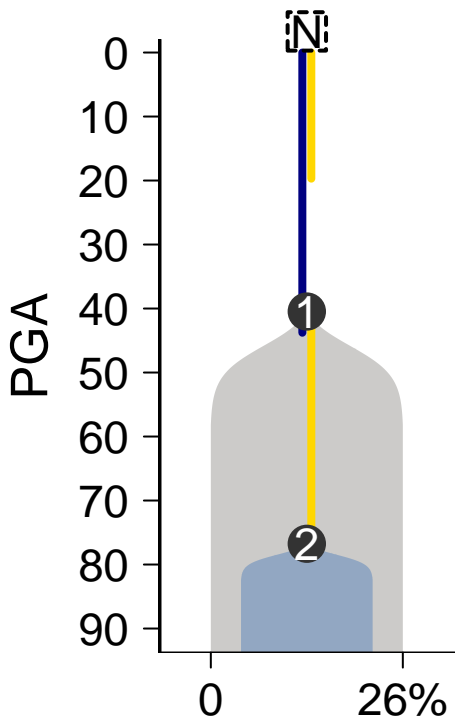

## MuTect-TITAN

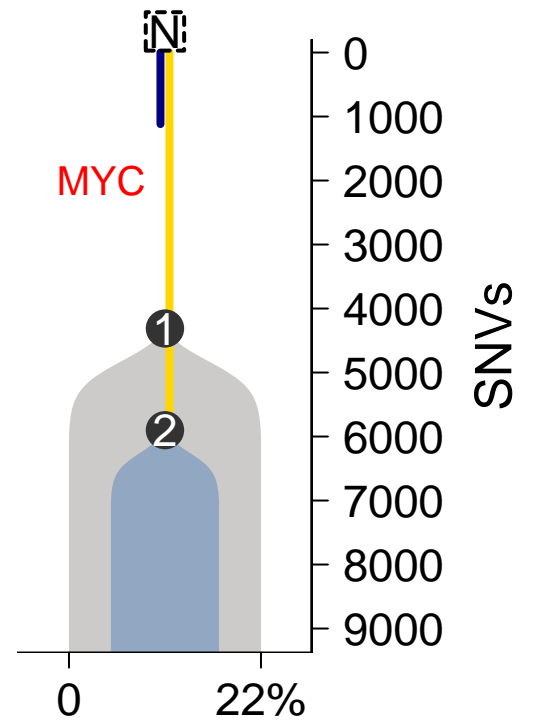

# CPCG0340

## SomaticSniper-Battenberg

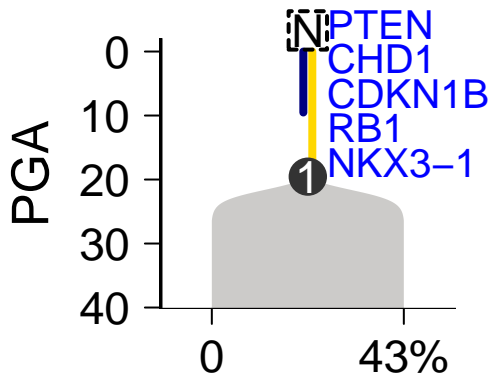

## SomaticSniper-TITAN

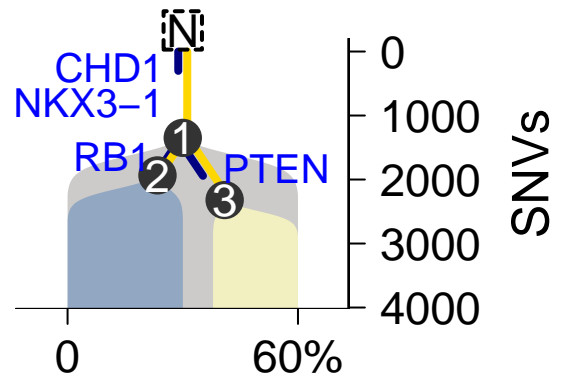

## MuTect-Battenberg

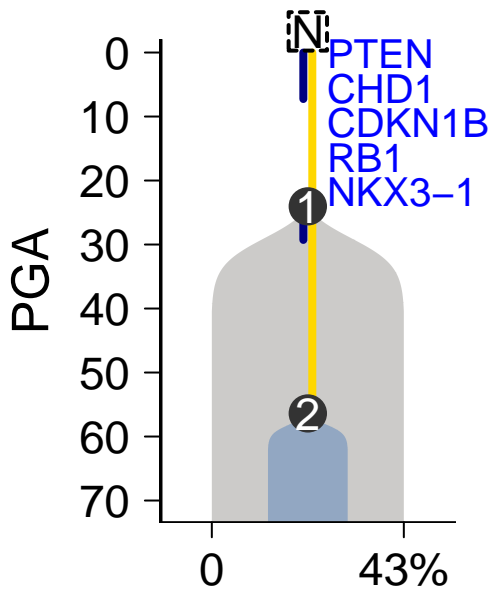

## MuTect-TITAN

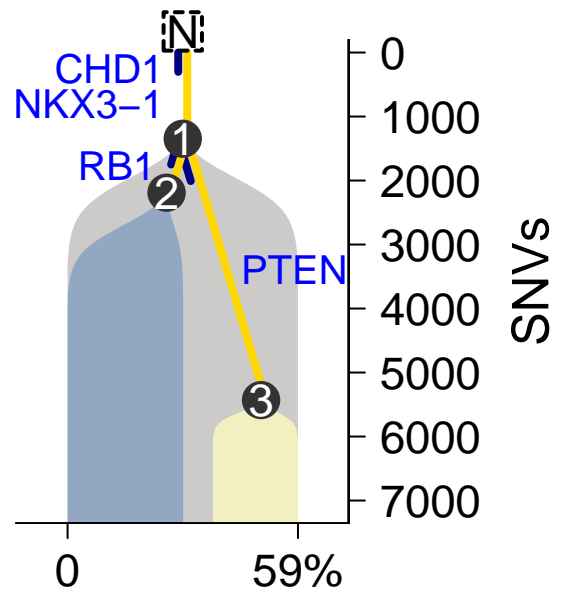

# CPCG0341

## SomaticSniper-Battenberg

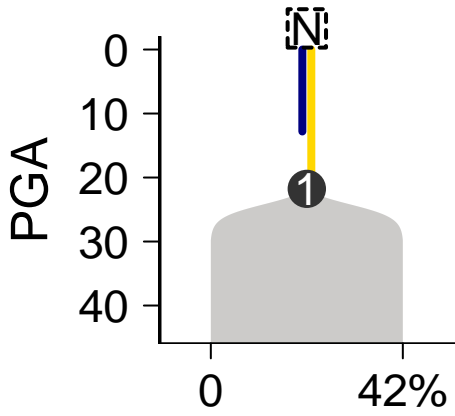

## SomaticSniper-TITAN

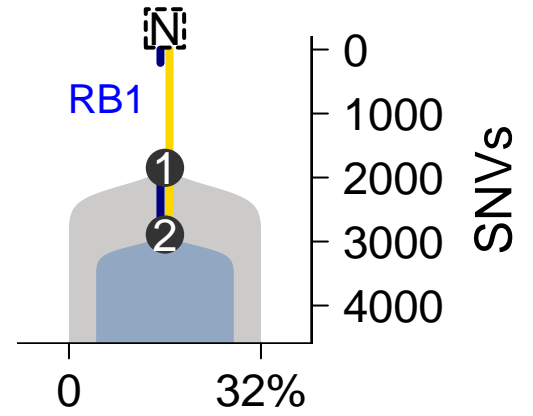

## MuTect-Battenberg

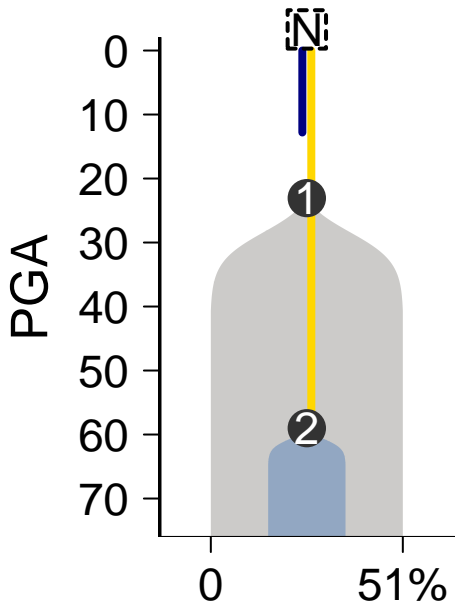

## MuTect-TITAN

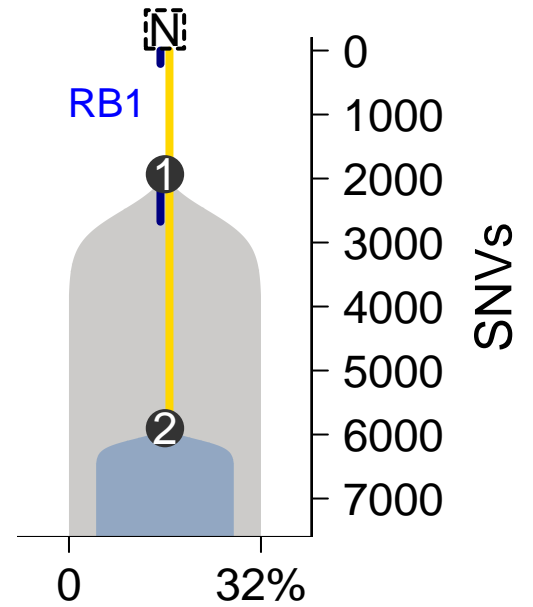

# CPCG0342

## SomaticSniper-Battenberg

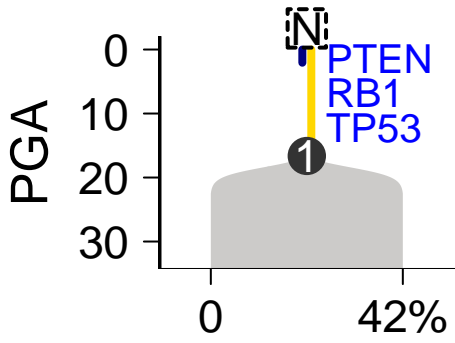

## SomaticSniper-TITAN

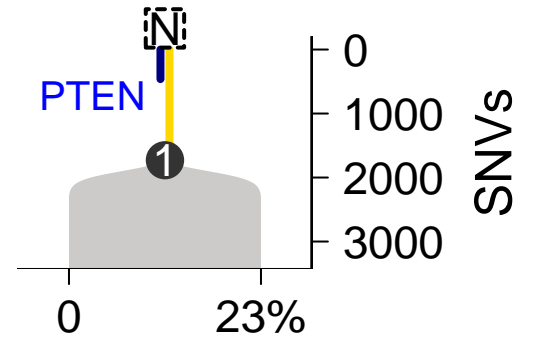

## MuTect-Battenberg

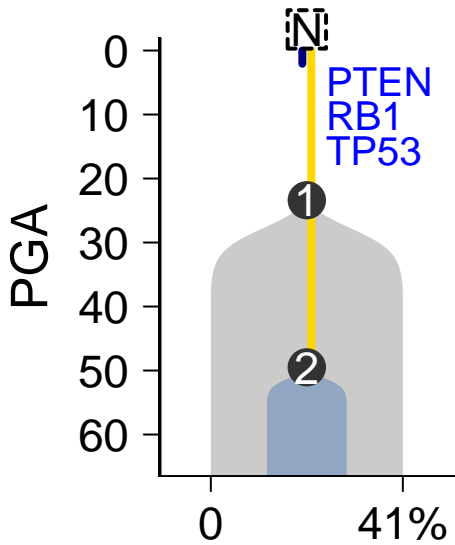

## MuTect-TITAN

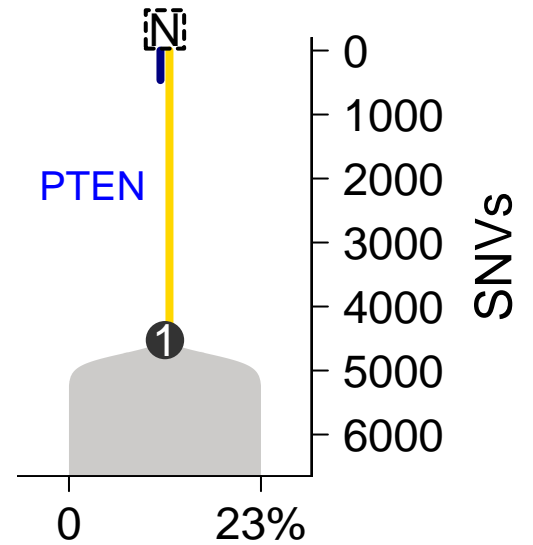

# CPCG0344

## SomaticSniper-Battenberg

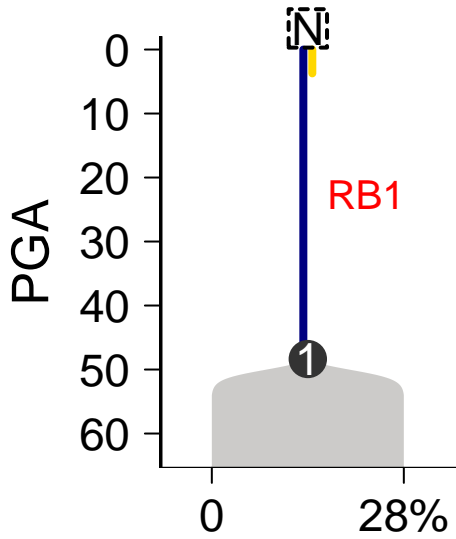

## SomaticSniper-TITAN

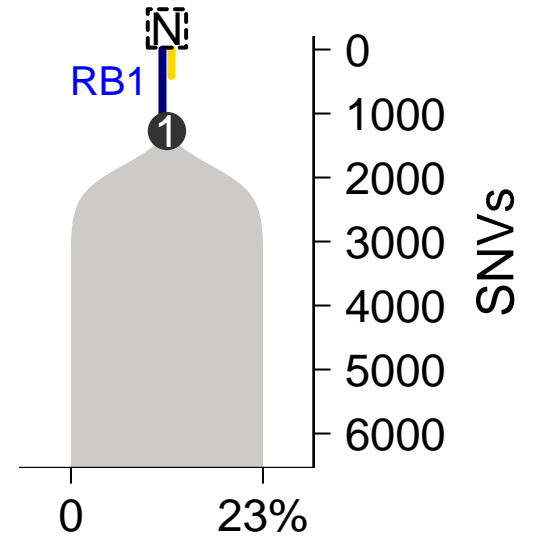

## MuTect-Battenberg

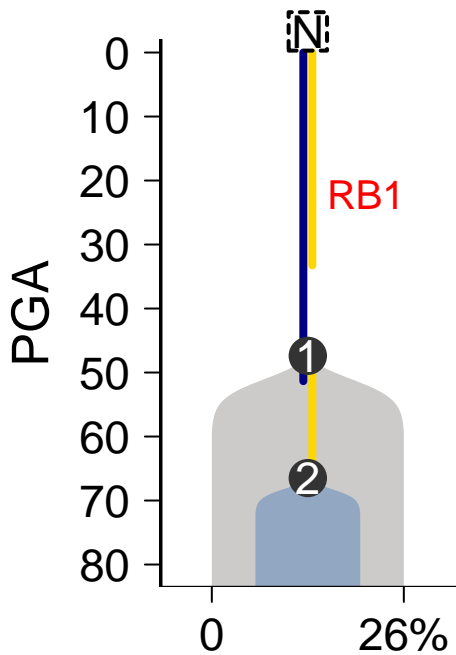

## MuTect-TITAN

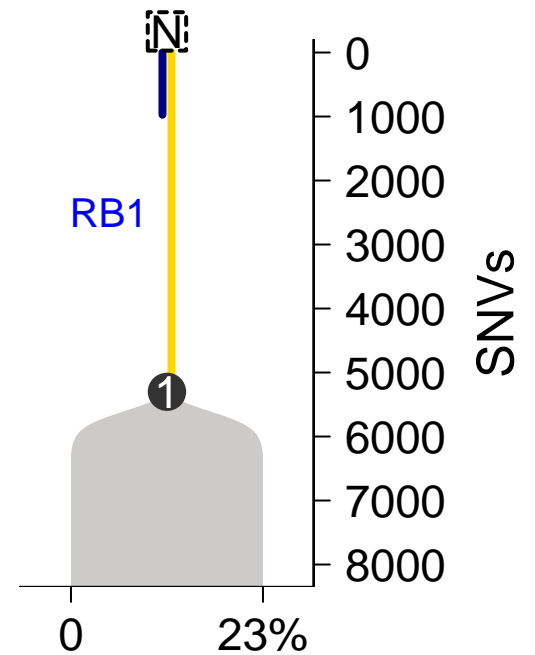

# CPCG0345

## SomaticSniper–Battenberg

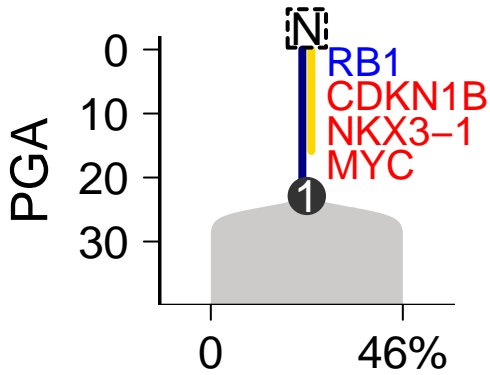

## SomaticSniper–TITAN

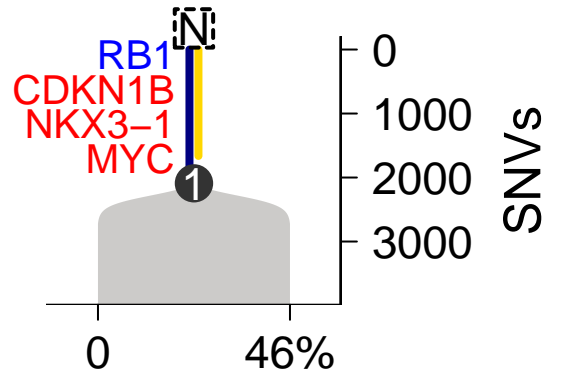

## MuTect–Battenberg

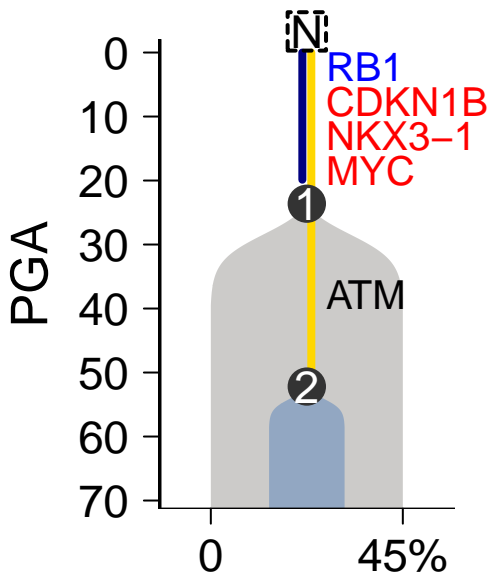

## MuTect–TITAN

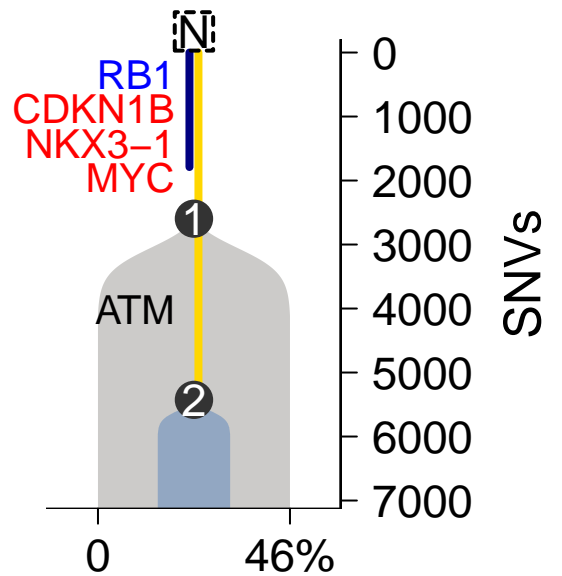

# CPCG0346

## SomaticSniper-Battenberg

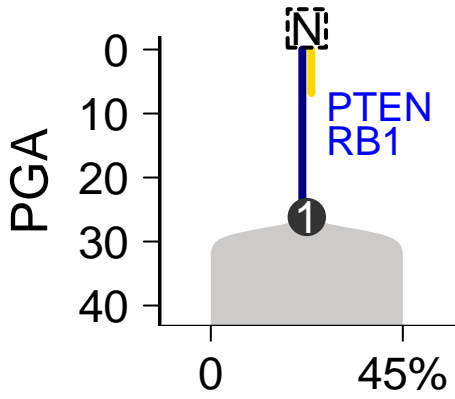

## SomaticSniper-TITAN

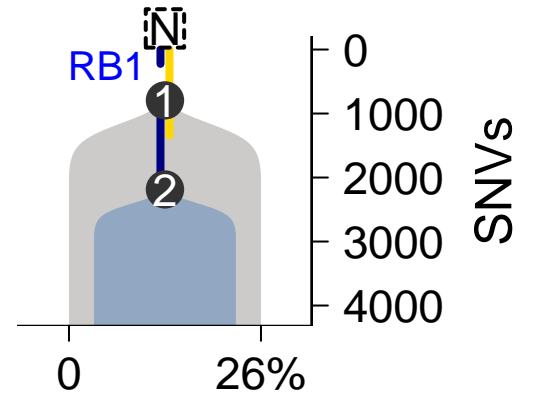

## MuTect-Battenberg

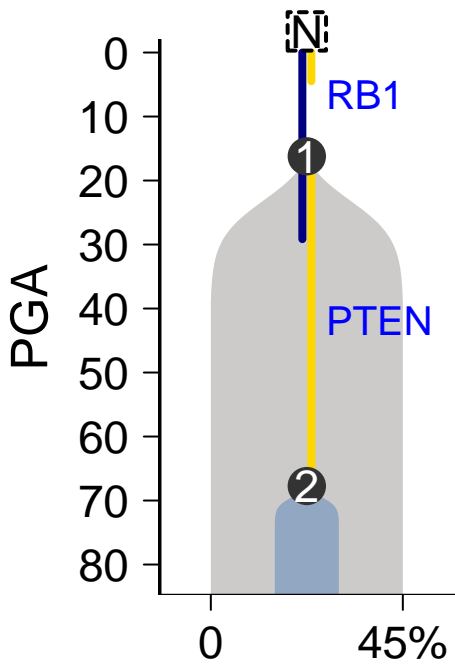

## MuTect-TITAN

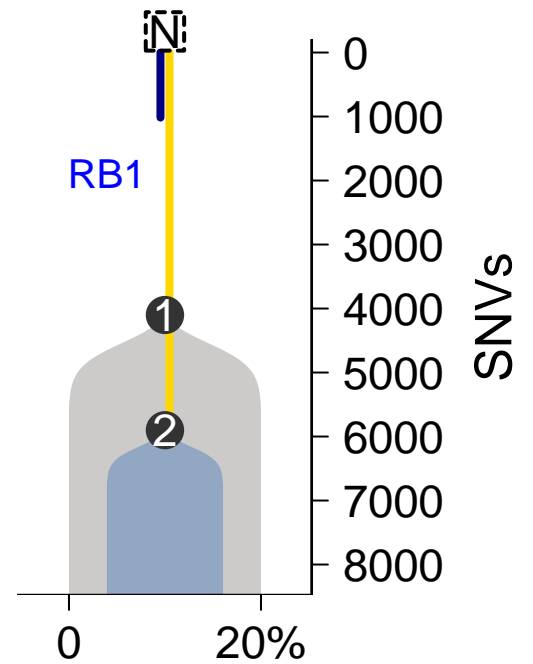



# CPCG0348

## SomaticSniper-Battenberg

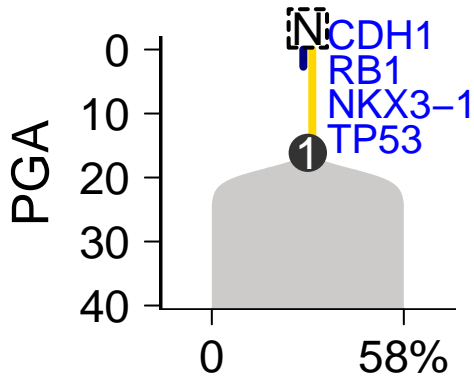

## SomaticSniper-TITAN

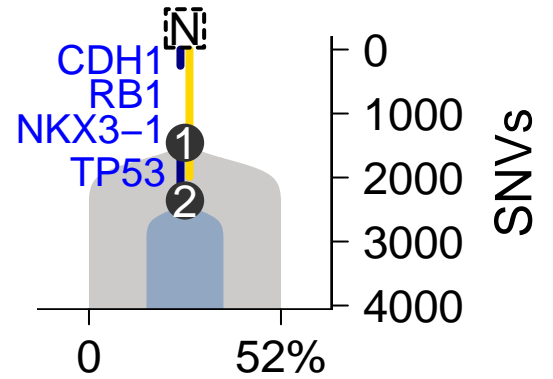

## MuTect-Battenberg

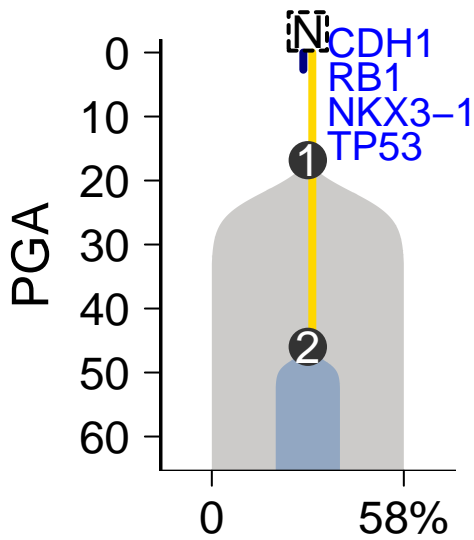

## MuTect-TITAN

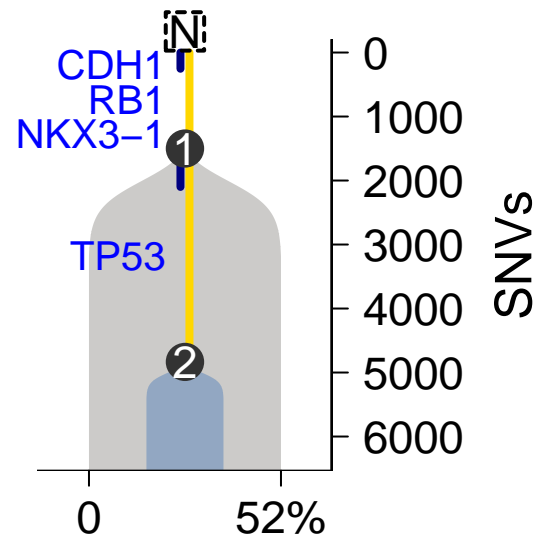

# CPCG0350

## SomaticSniper-Battenberg

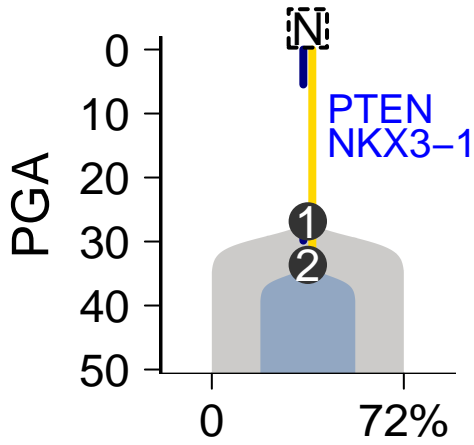

## SomaticSniper-TITAN

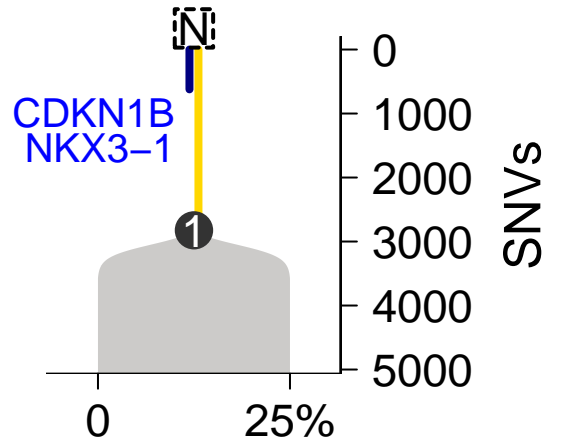

## MuTect-Battenberg

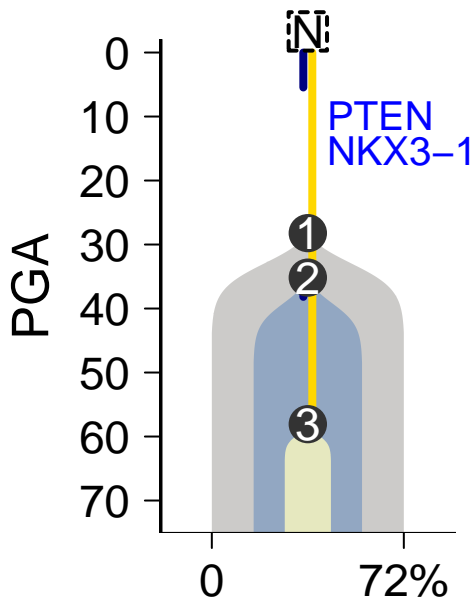

## MuTect-TITAN

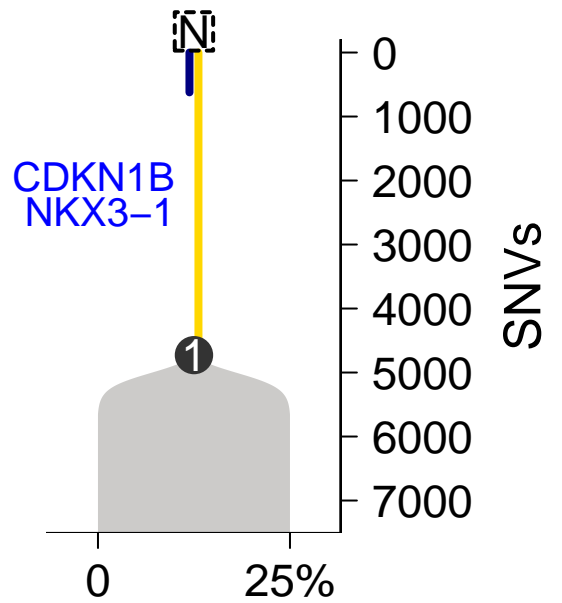

# CPCG0352

## SomaticSniper-Battenberg

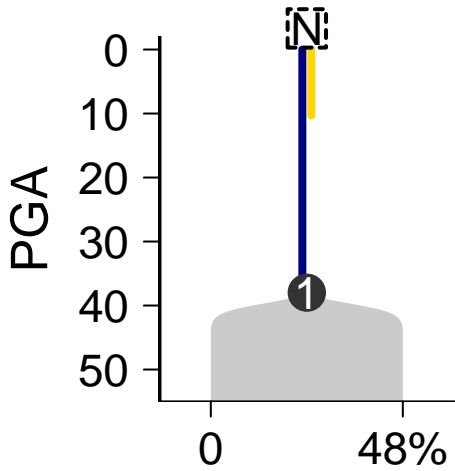

## SomaticSniper-TITAN

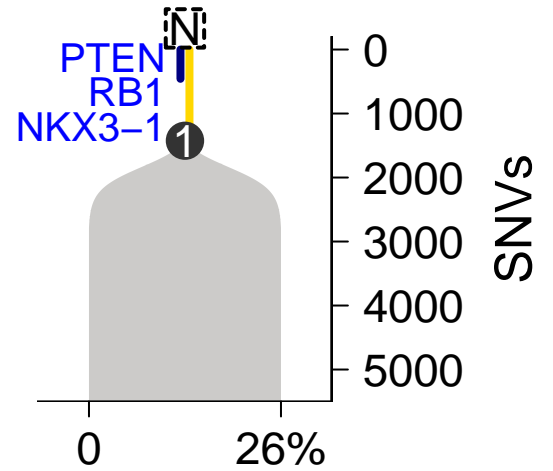

## MuTect-Battenberg

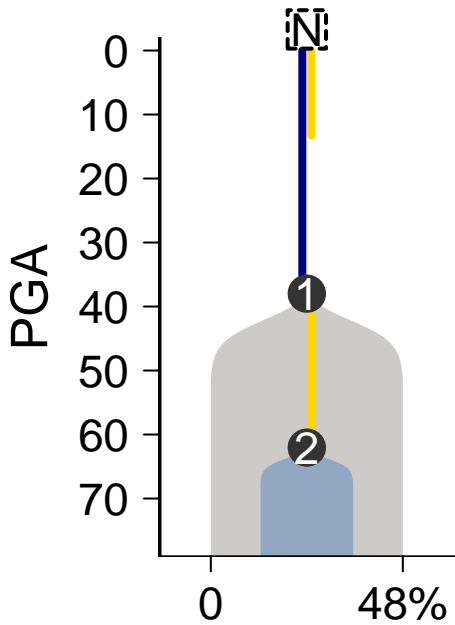

## MuTect-TITAN

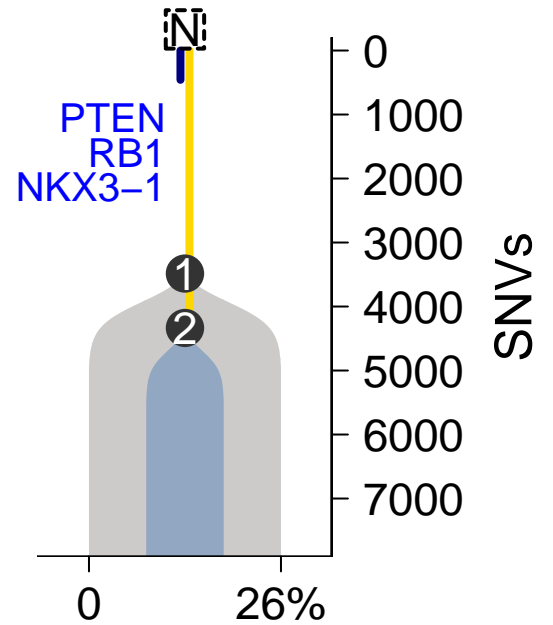

# CPCG0353

## SomaticSniper–Battenberg

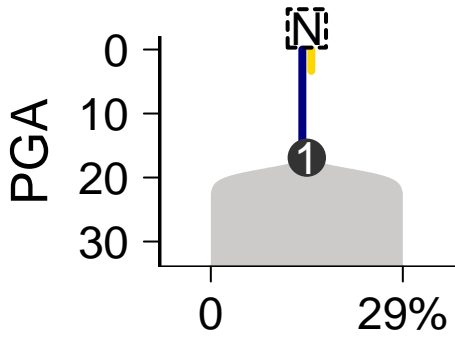

## SomaticSniper–TITAN

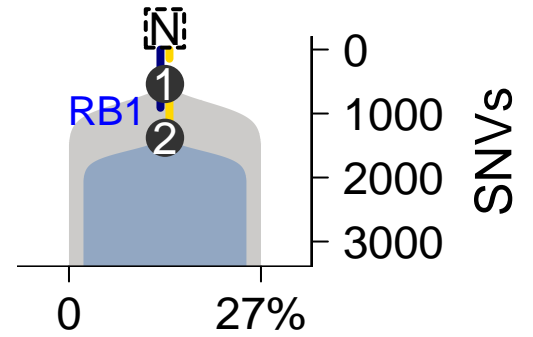

## MuTect–Battenberg

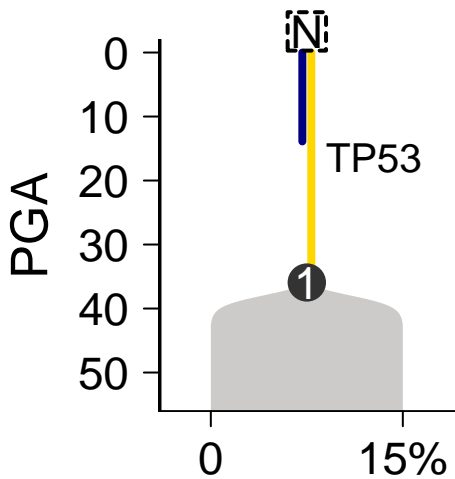

## MuTect–TITAN

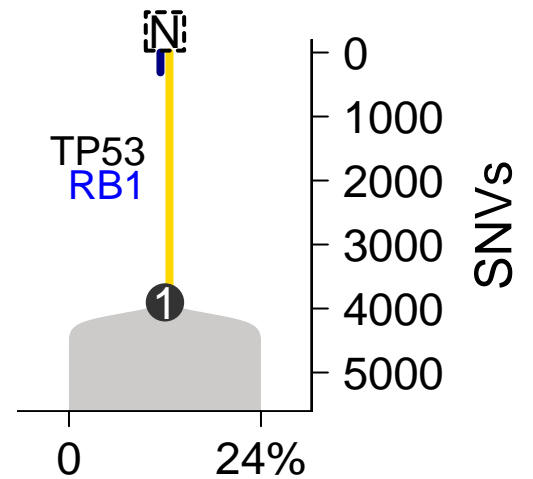

# CPCG0354

## SomaticSniper-Battenberg

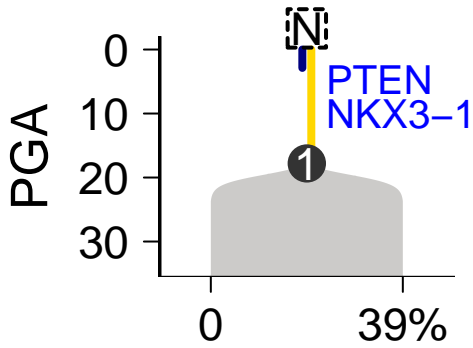

## SomaticSniper-TITAN

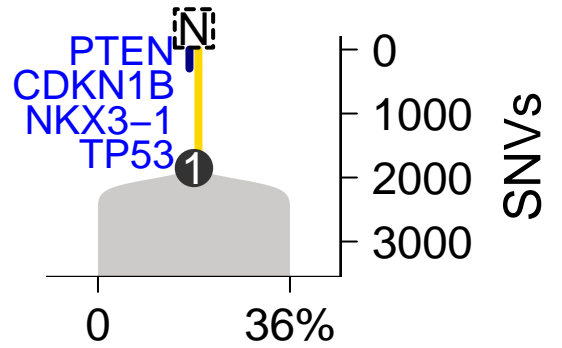

## MuTect-Battenberg

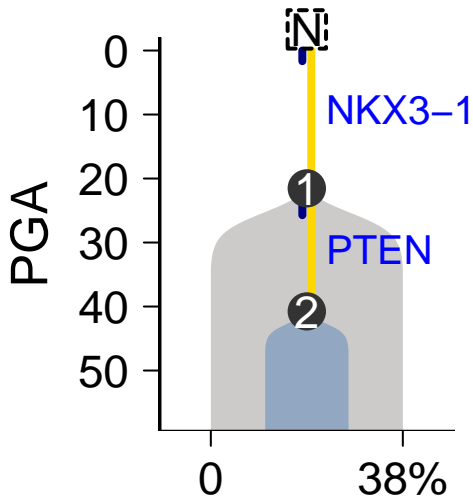

## MuTect-TITAN

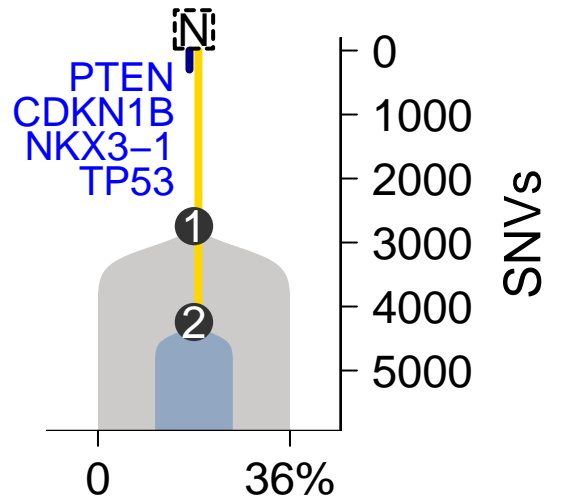

# CPCG0355

## SomaticSniper-Battenberg

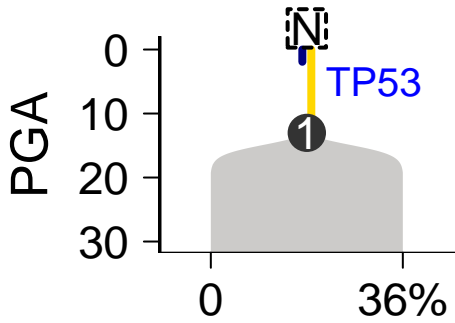

## SomaticSniper-TITAN

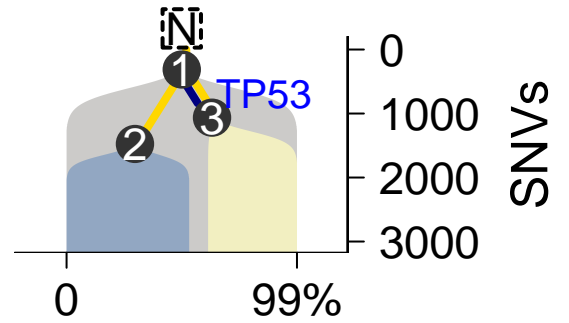

## MuTect-Battenberg

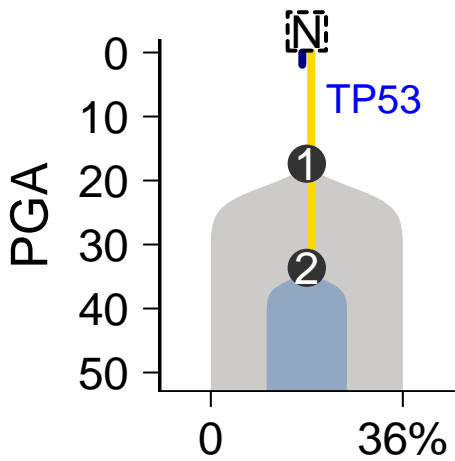

## MuTect-TITAN

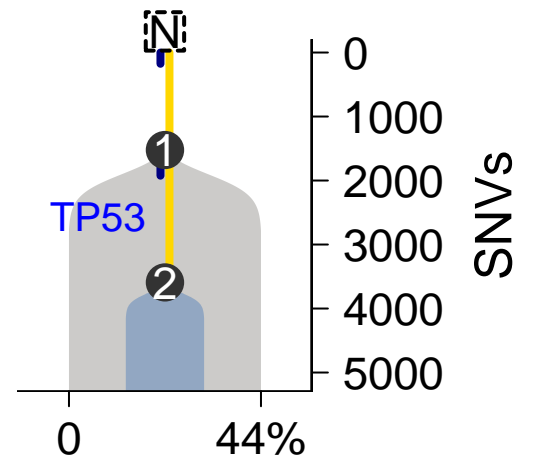

# CPCG0356

## SomaticSniper-Battenberg

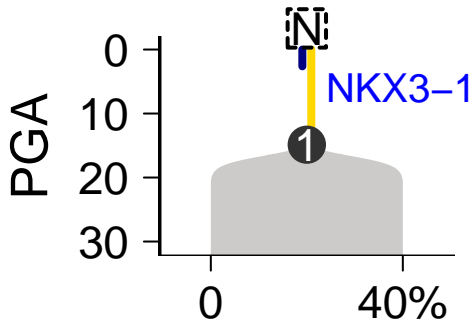

## SomaticSniper-TITAN

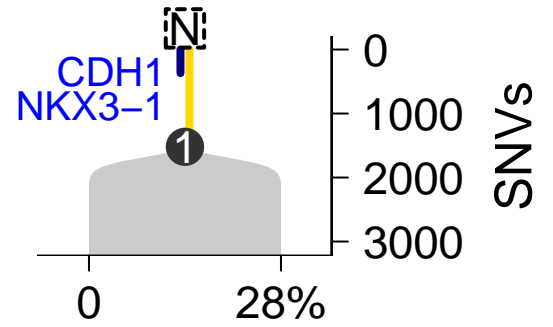

## MuTect-Battenberg

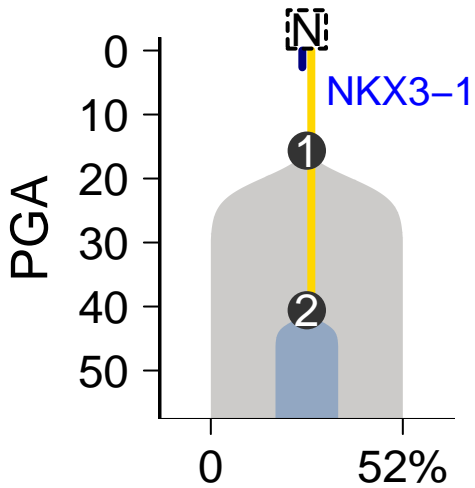

## MuTect-TITAN

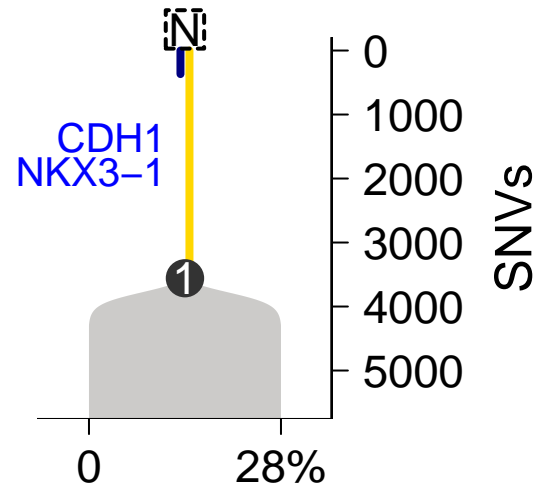

# CPCG0357

## SomaticSniper–Battenberg

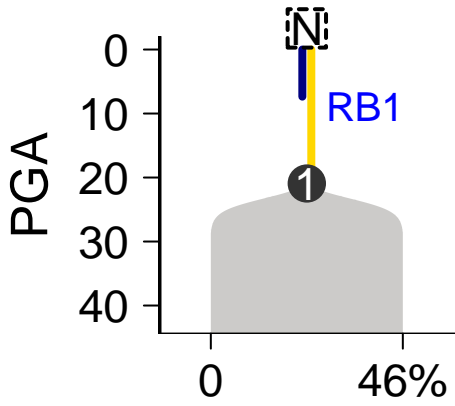

## SomaticSniper–TITAN

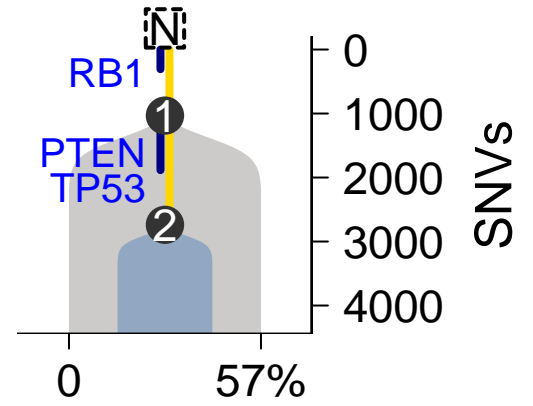

## MuTect–Battenberg

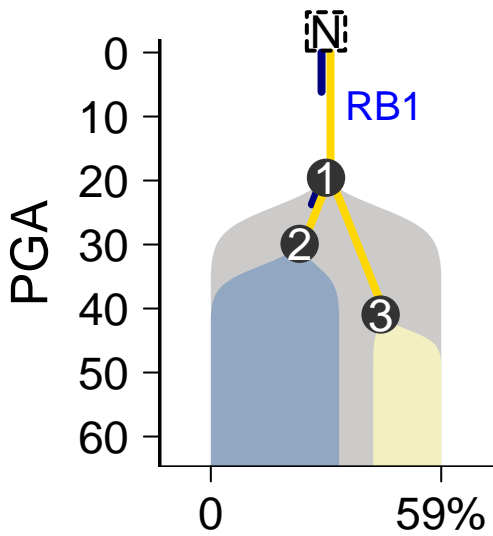

## MuTect–TITAN

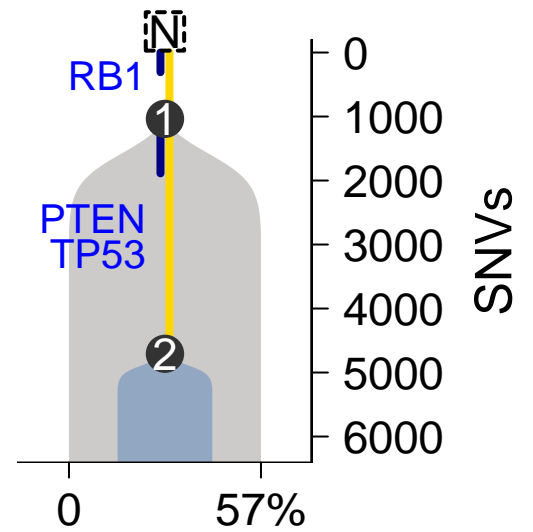



# CPCG0358

## SomaticSniper-Battenberg

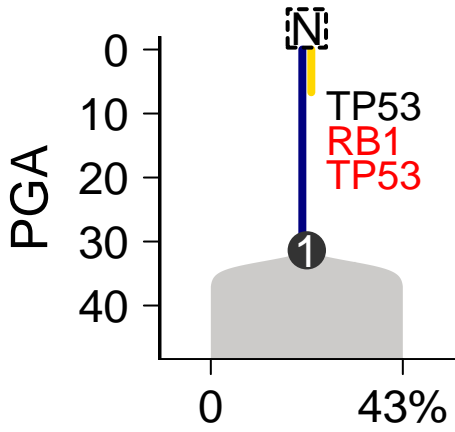

## SomaticSniper-TITAN

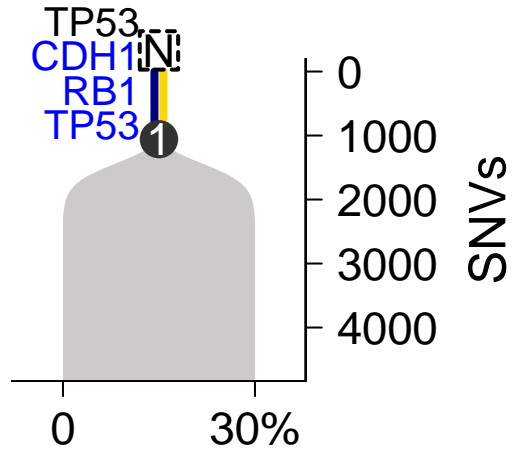

## MuTect-Battenberg

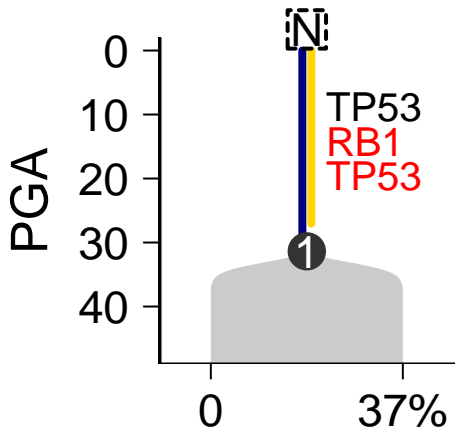

## MuTect-TITAN

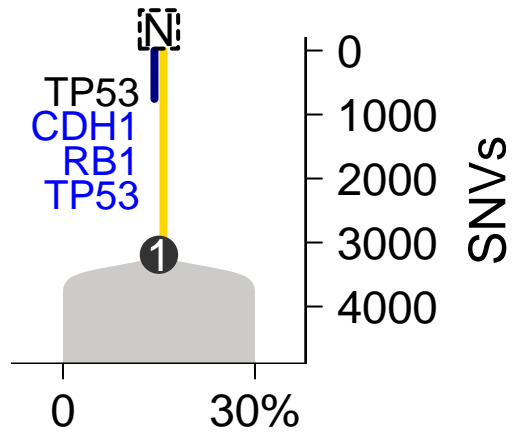

# CPCG0360

## SomaticSniper-Battenberg

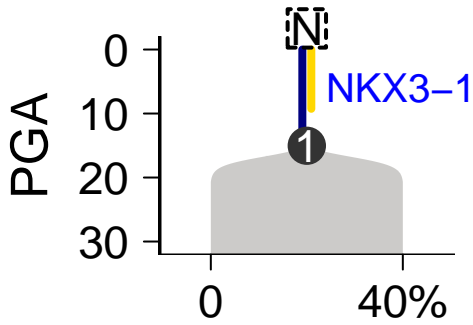

## SomaticSniper-TITAN

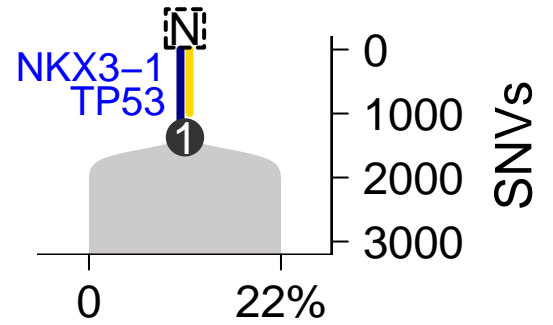

## MuTect-Battenberg

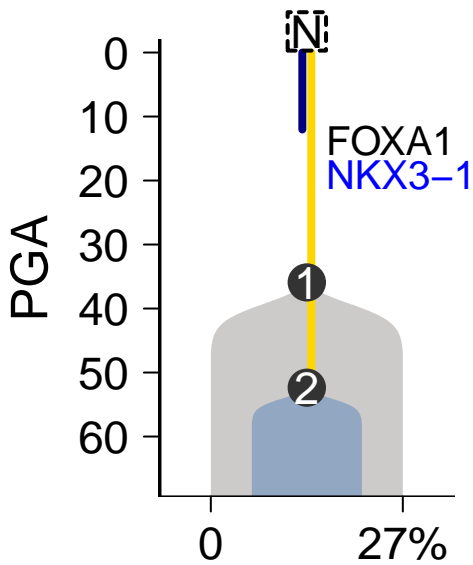

## MuTect-TITAN

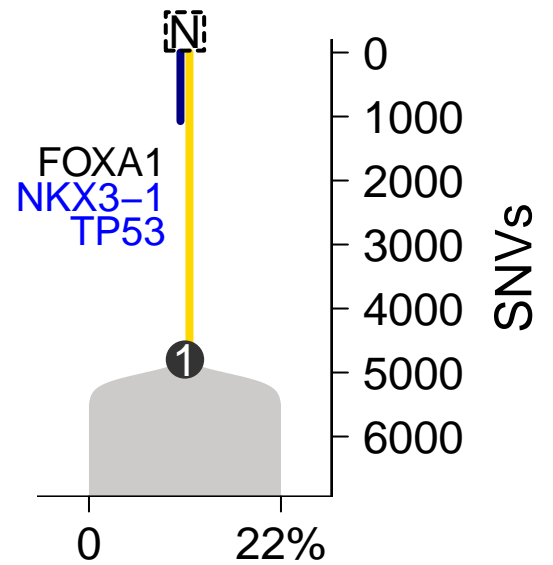

# CPCG0361

## SomaticSniper-Battenberg

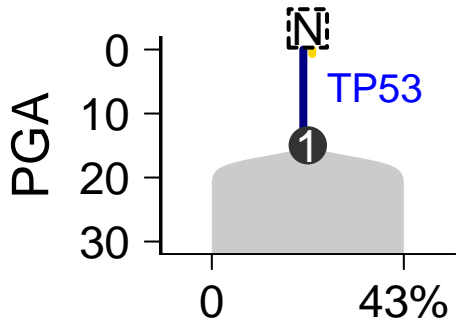

## SomaticSniper-TITAN

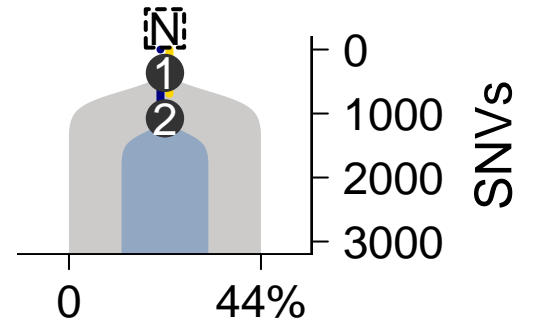

## MuTect-TITAN

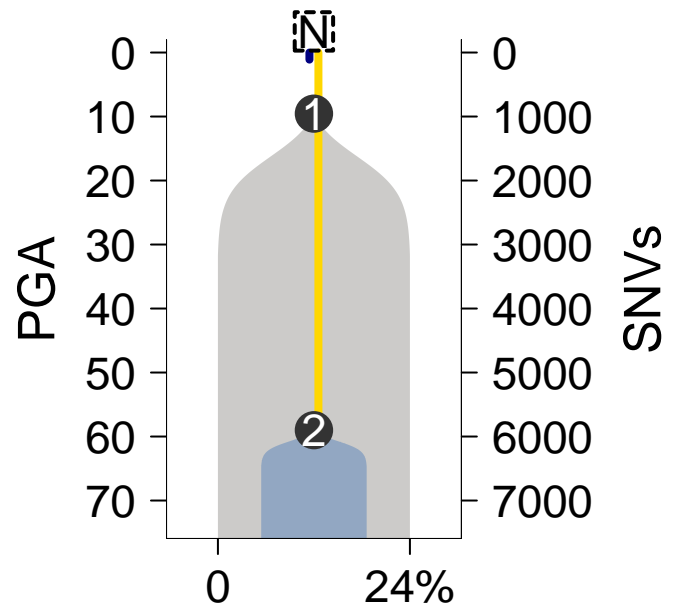

# CPCG0362

## SomaticSniper-Battenberg

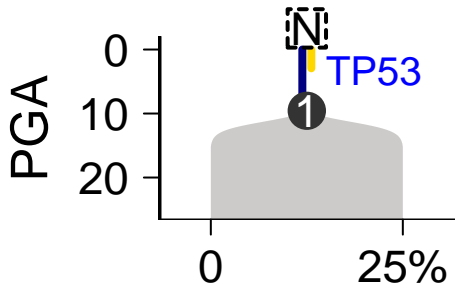

## SomaticSniper-TITAN

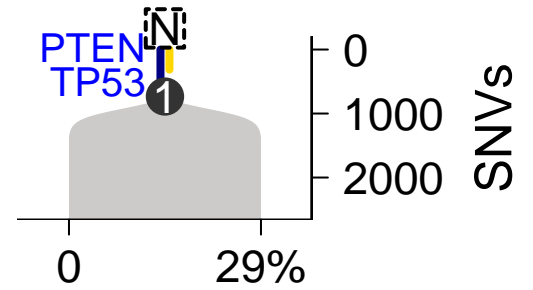

## MuTect-Battenberg

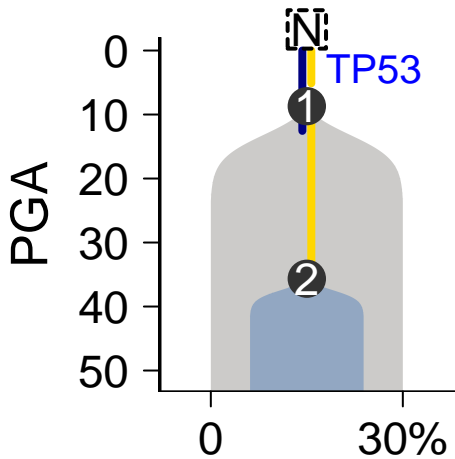

## MuTect-TITAN

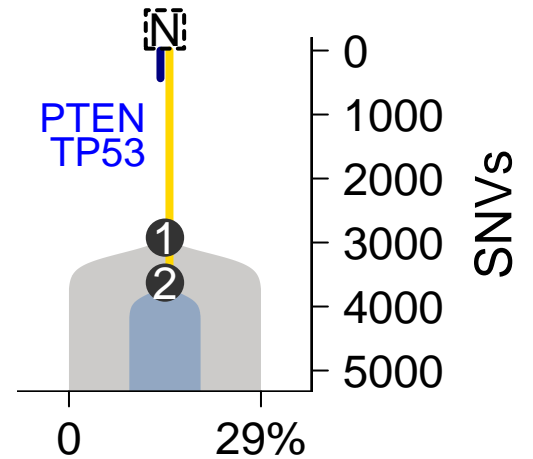

# CPCG0363

## SomaticSniper-Battenberg

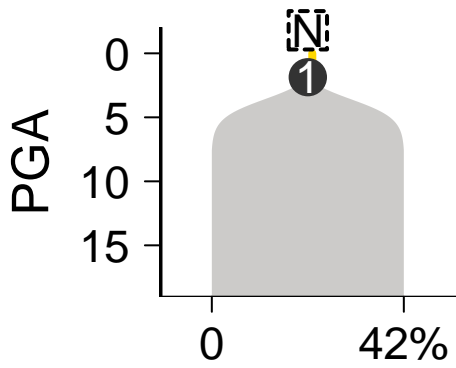

## SomaticSniper-TITAN

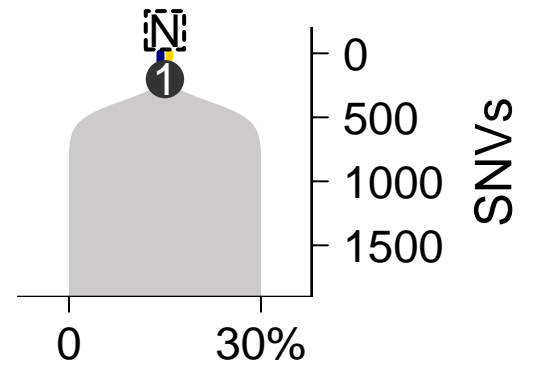

## MuTect-Battenberg

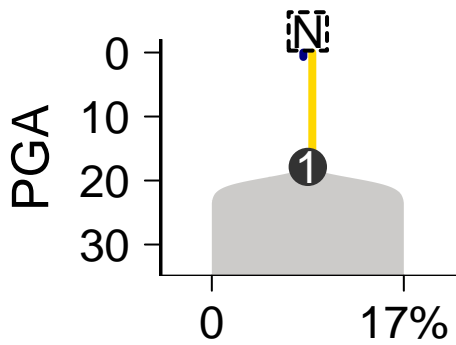

## MuTect-TITAN

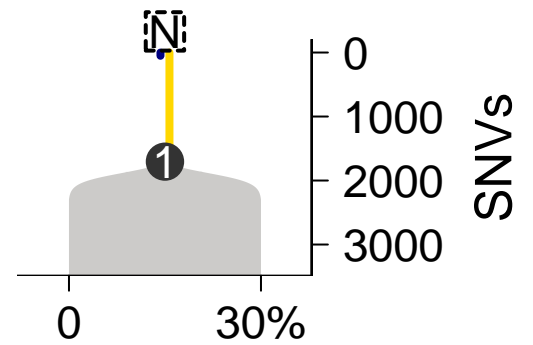

# CPCG0364-B1F1

## SomaticSniper-Battenberg

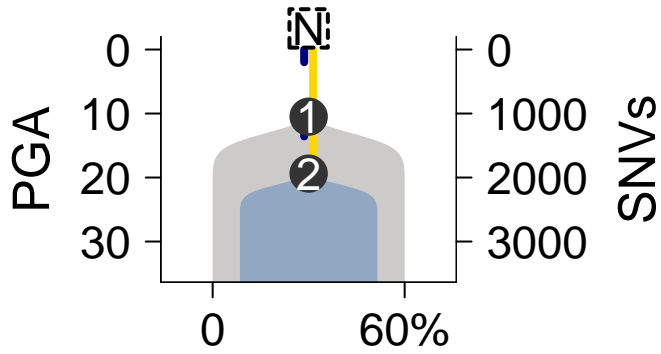

## MuTect-Battenberg

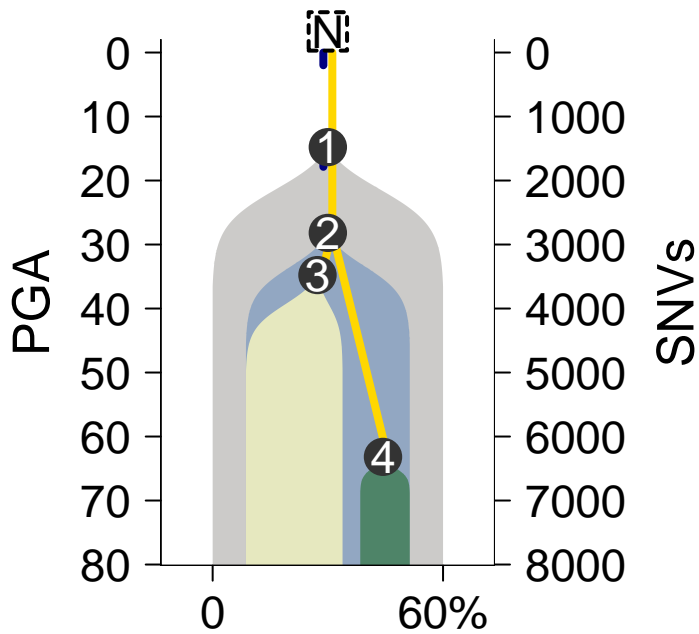

# CPCG0364

## SomaticSniper-TITAN

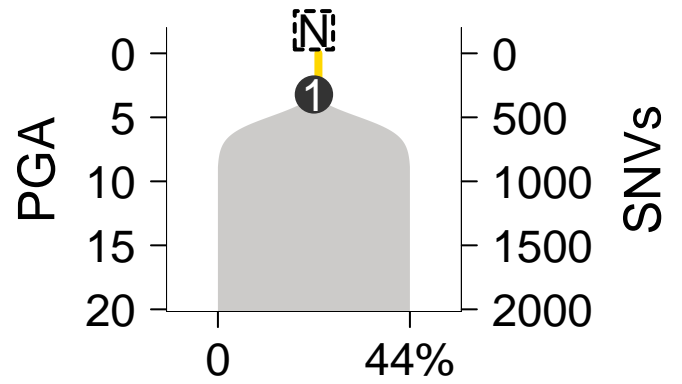

## MuTect-TITAN

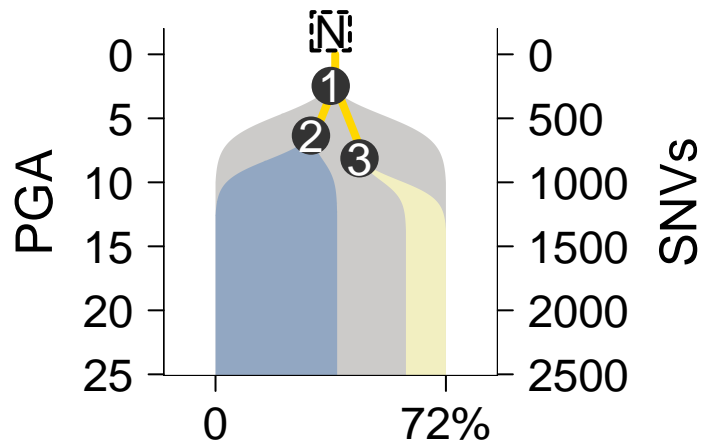

# CPCG0365

## SomaticSniper-Battenberg

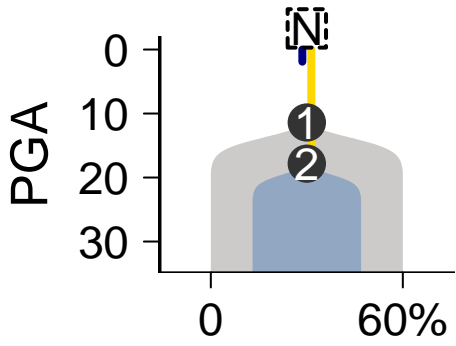

## SomaticSniper-TITAN

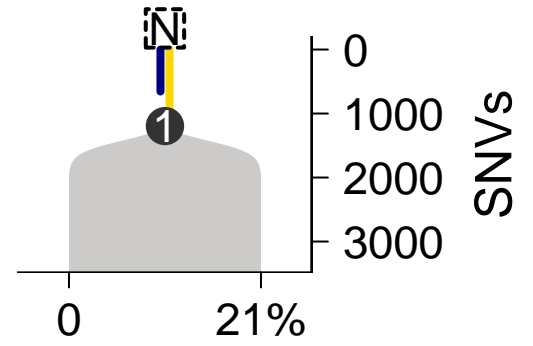

## MuTect-Battenberg

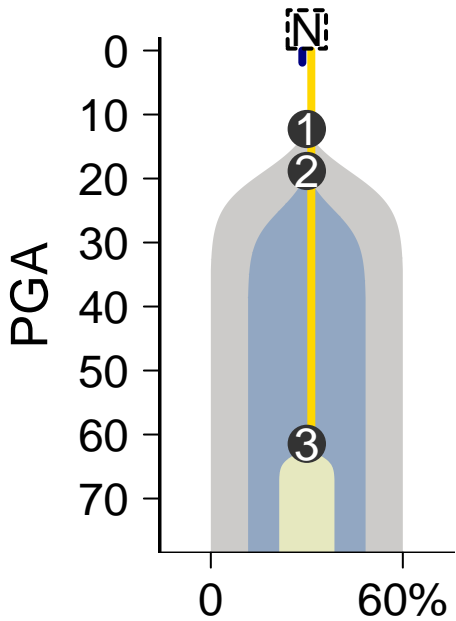

## MuTect-TITAN

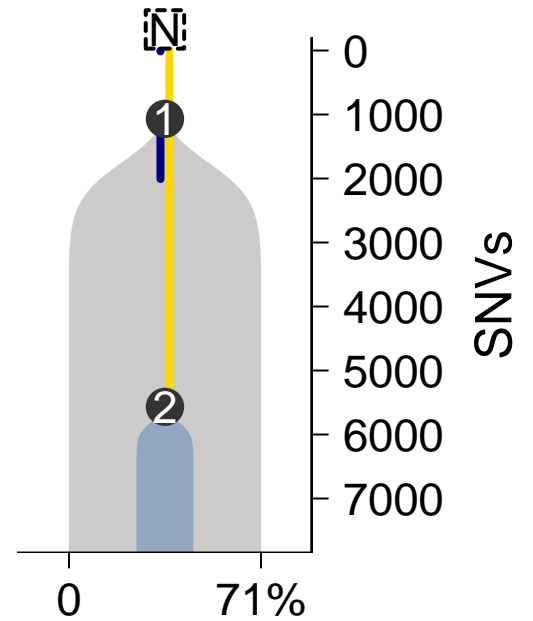



# CPCG0366

## SomaticSniper-Battenberg

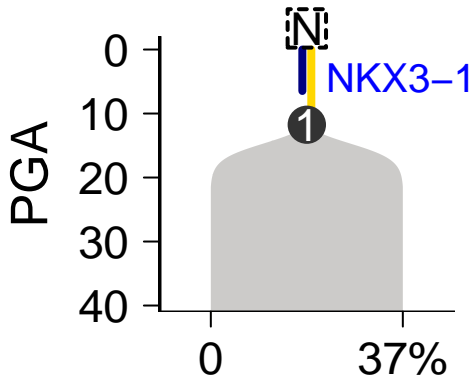

## SomaticSniper-TITAN

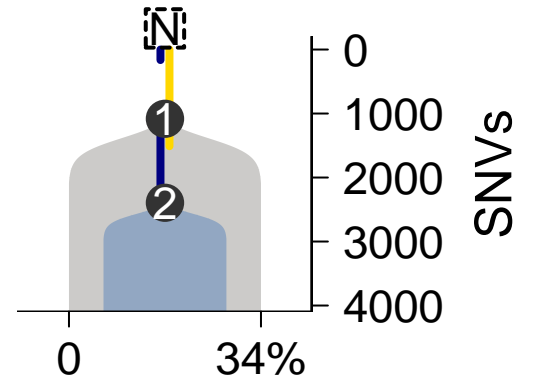

## MuTect-Battenberg

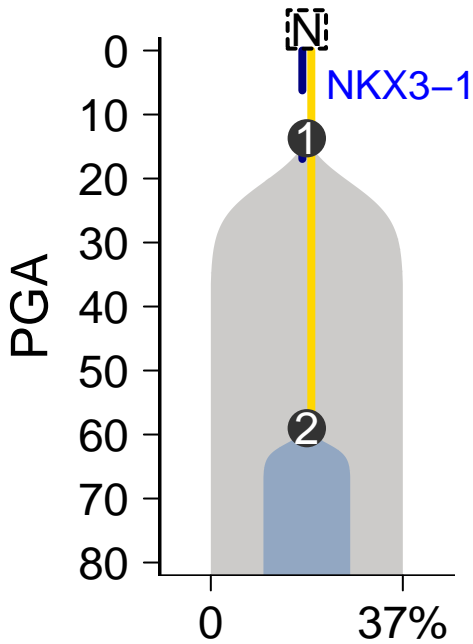

## MuTect-TITAN

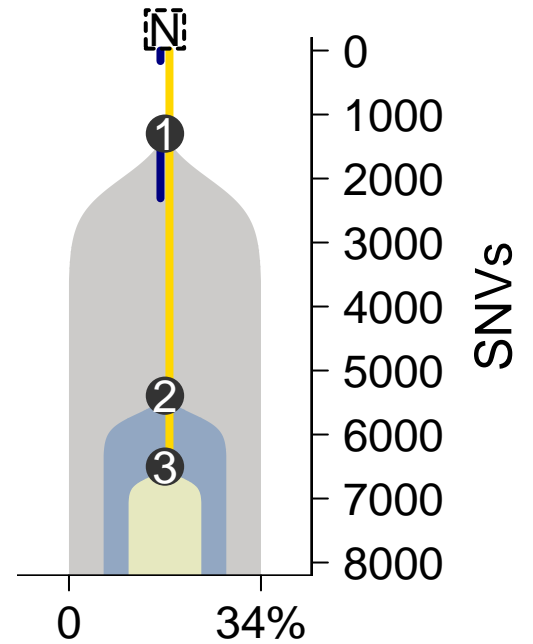

# CPCG0368

## SomaticSniper-Battenberg

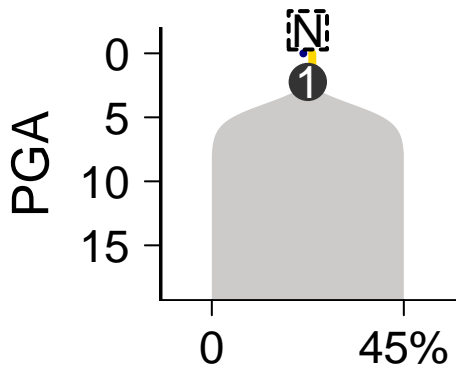

## SomaticSniper-TITAN

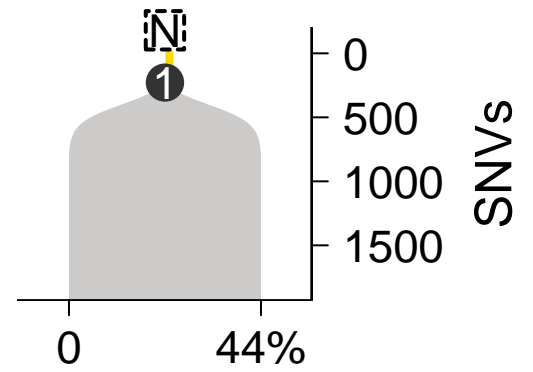

## MuTect-Battenberg

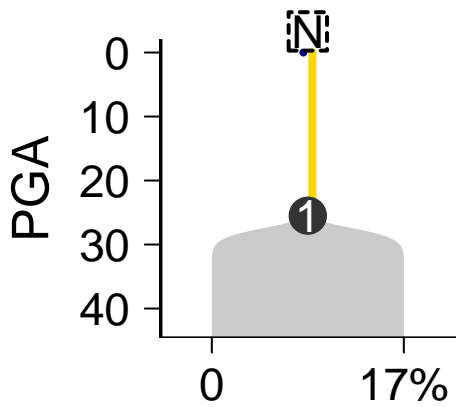

## MuTect-TITAN

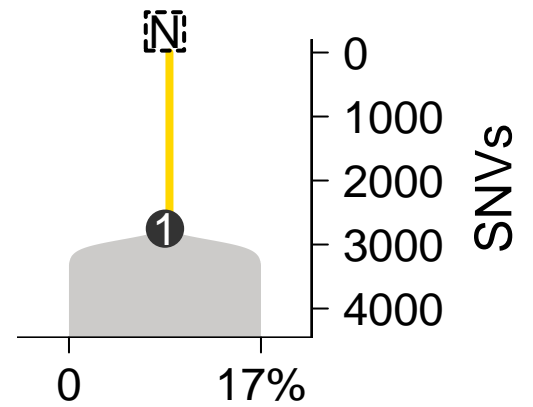

# CPCG0369

## SomaticSniper–Battenberg

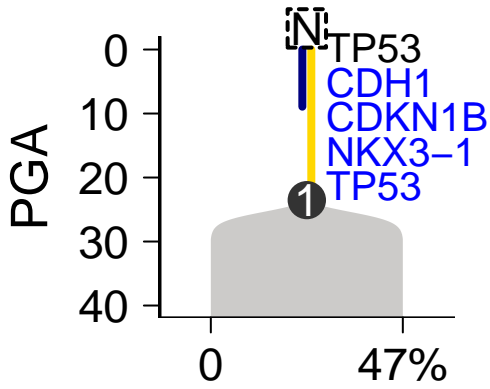

## SomaticSniper–TITAN

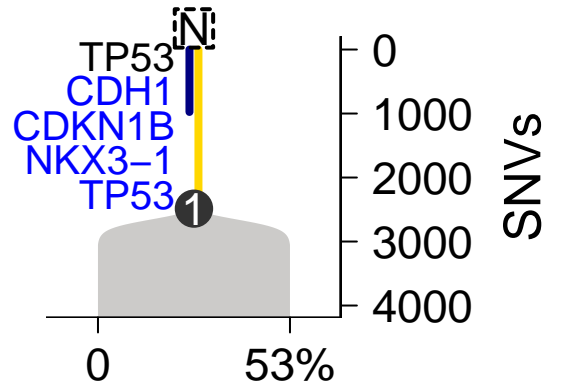

## MuTect–Battenberg

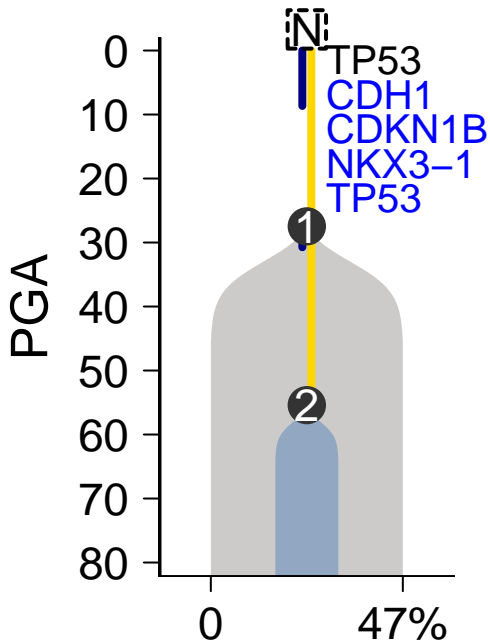

## MuTect–TITAN

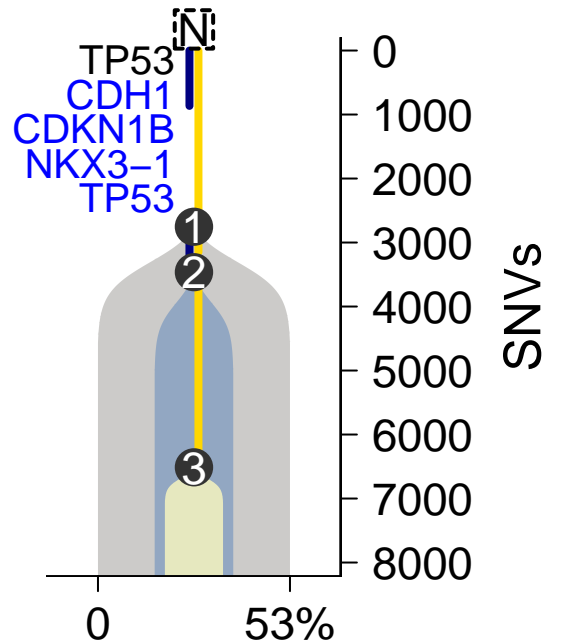

# CPCG0371

## SomaticSniper-Battenberg

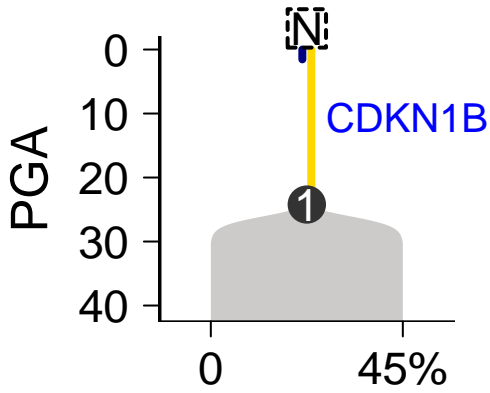

## SomaticSniper-TITAN

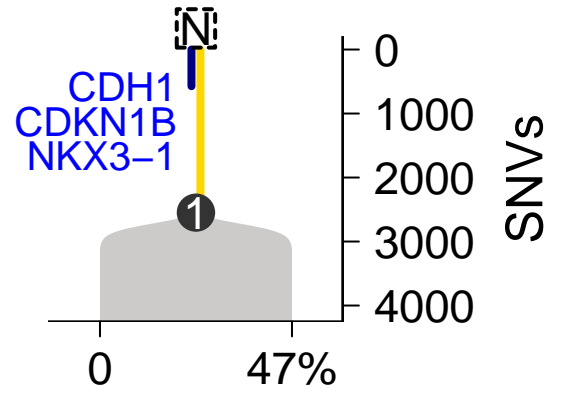

## MuTect-Battenberg

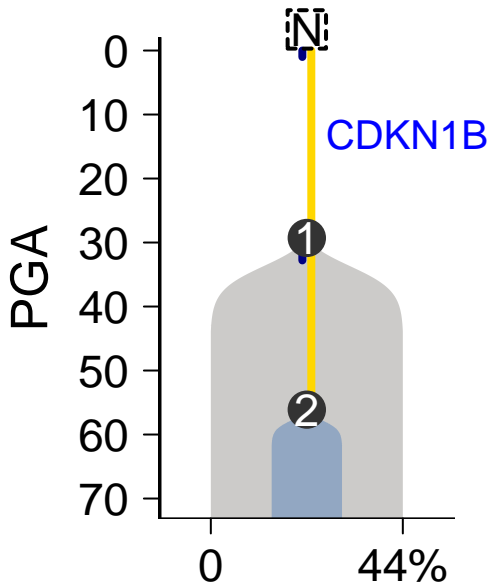

## MuTect-TITAN

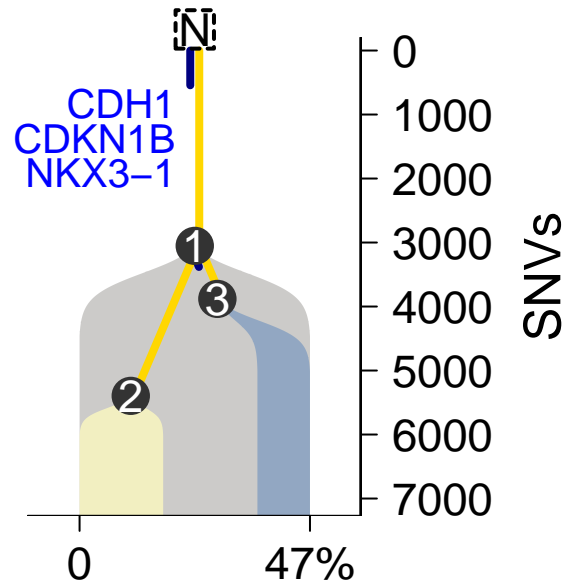

# CPCG0372

## SomaticSniper-Battenberg

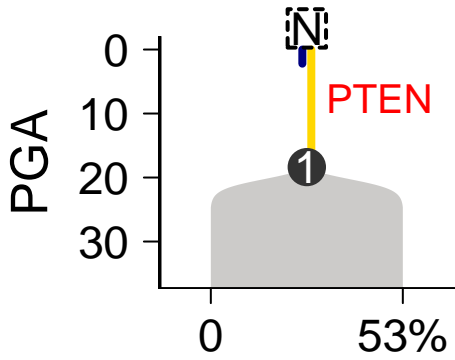

## SomaticSniper-TITAN

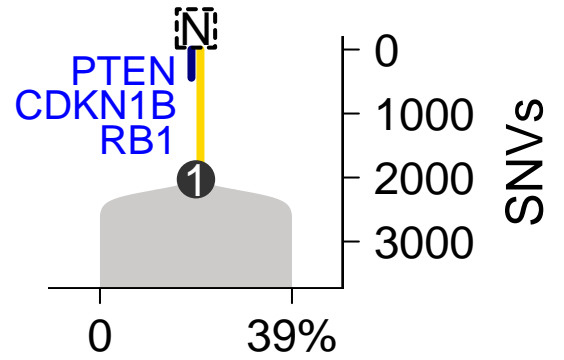

## MuTect-Battenberg

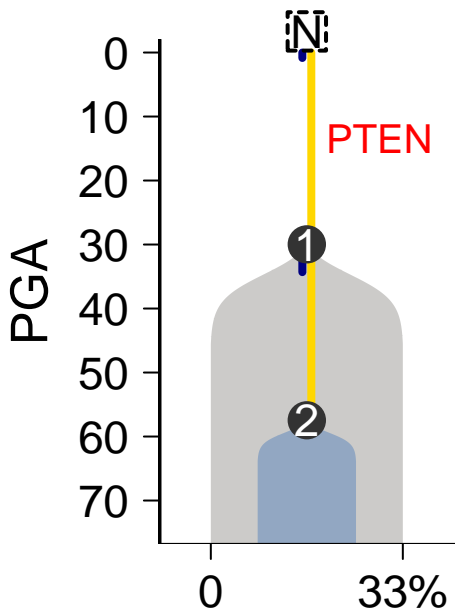

## MuTect-TITAN

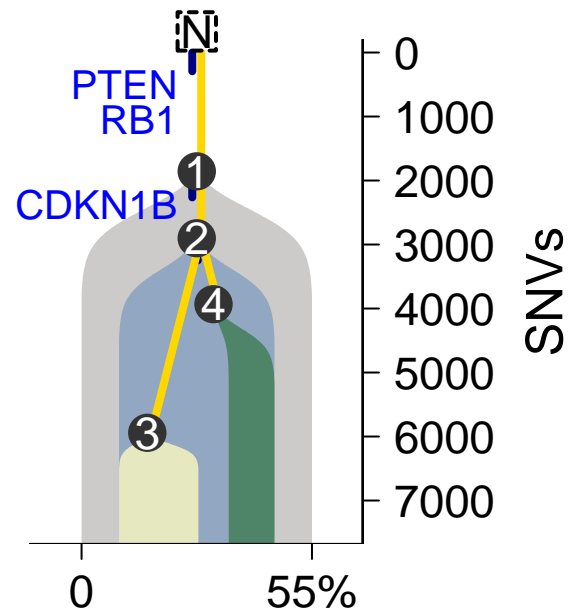

# CPCG0373

## SomaticSniper-Battenberg

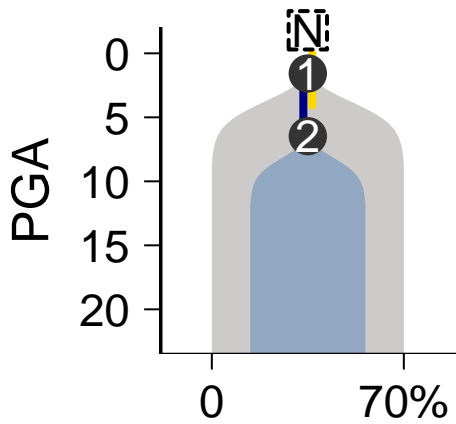

## SomaticSniper-TITAN

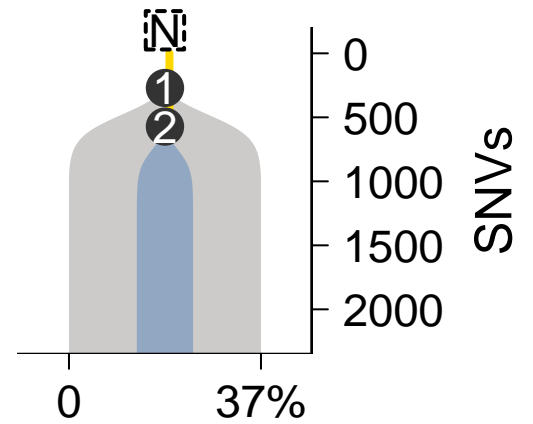

## MuTect-Battenberg

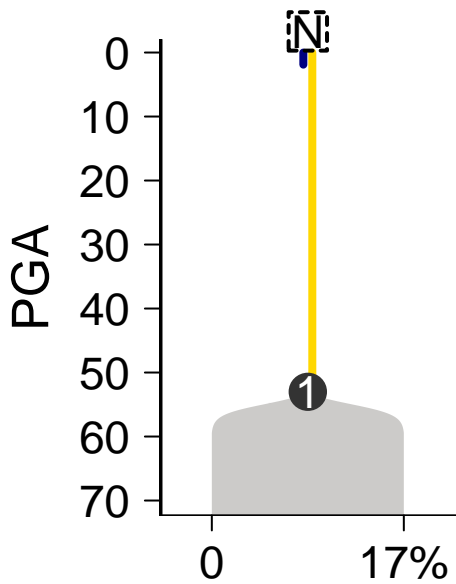

## MuTect-TITAN

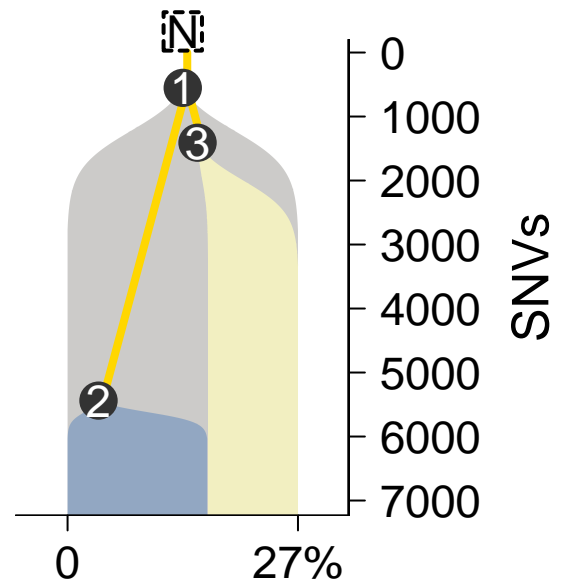

# CPCG0374

## SomaticSniper–Battenberg

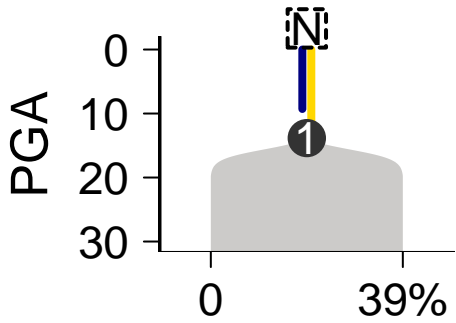

## SomaticSniper–TITAN

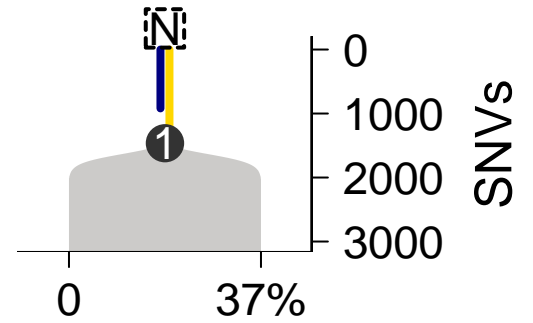

## MuTect–Battenberg

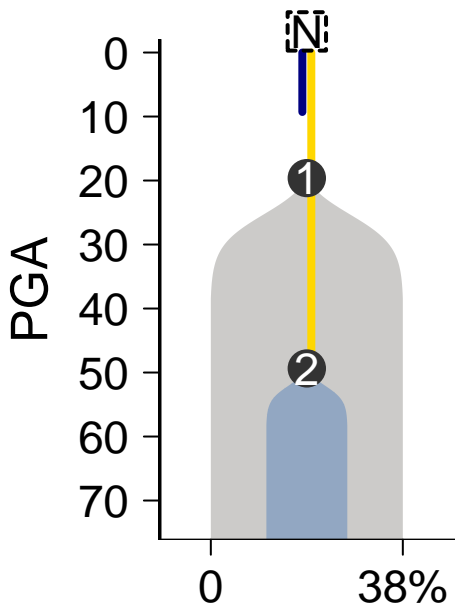

## MuTect–TITAN

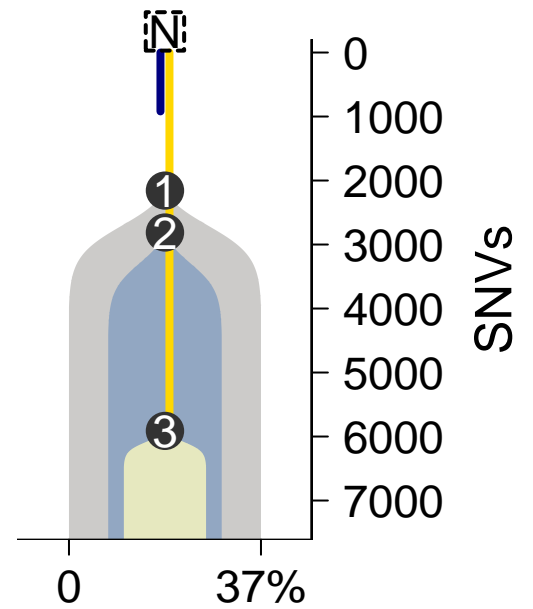

# CPCG0375

## SomaticSniper-Battenberg

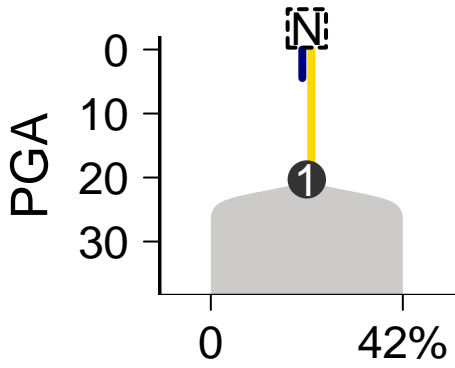

## SomaticSniper-TITAN

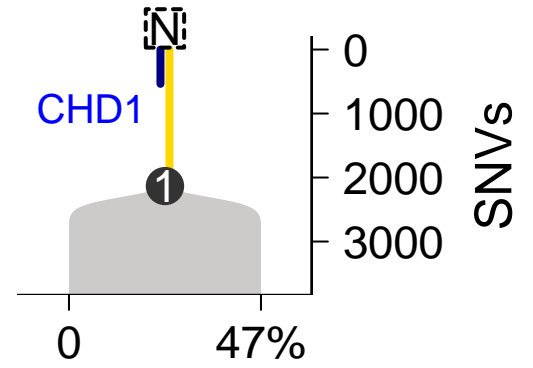

## MuTect-Battenberg

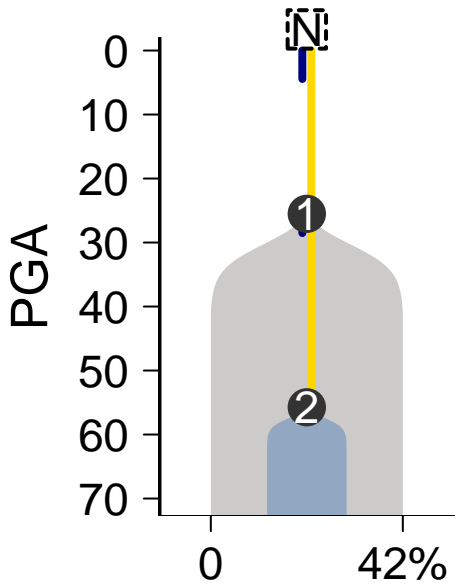

## MuTect-TITAN

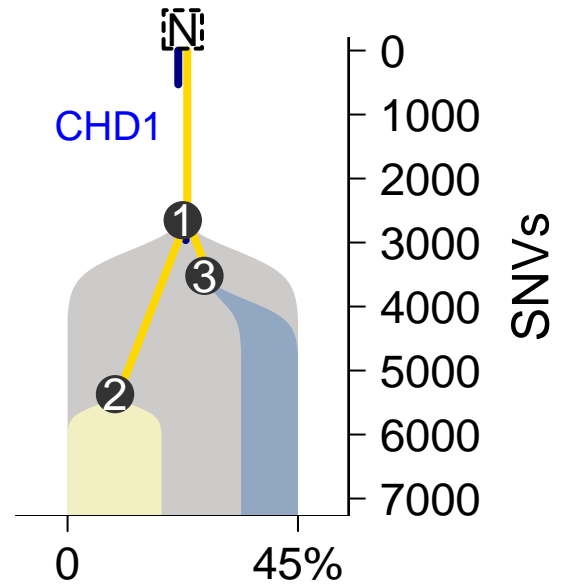



# CPCG0378

## SomaticSniper–Battenberg

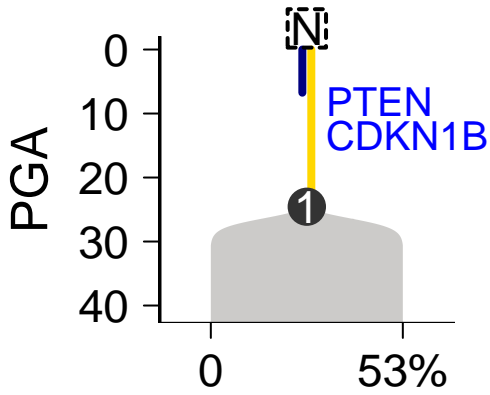

## SomaticSniper–TITAN

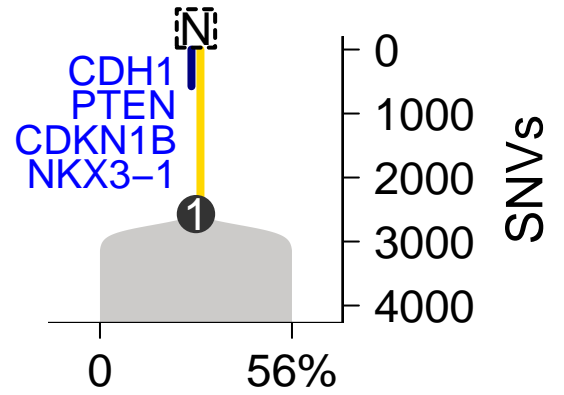

## MuTect–Battenberg

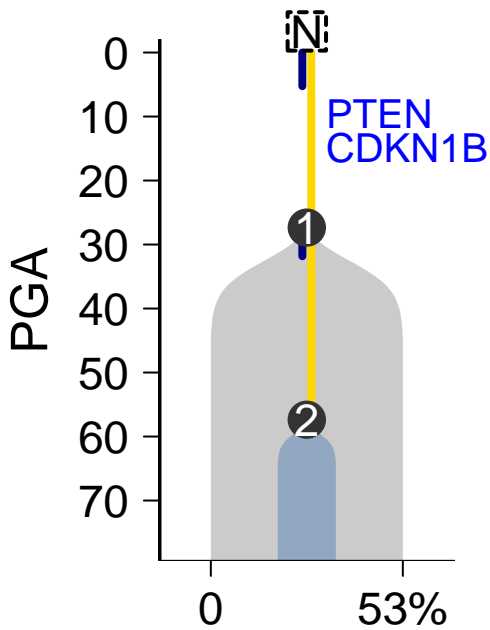

## MuTect–TITAN

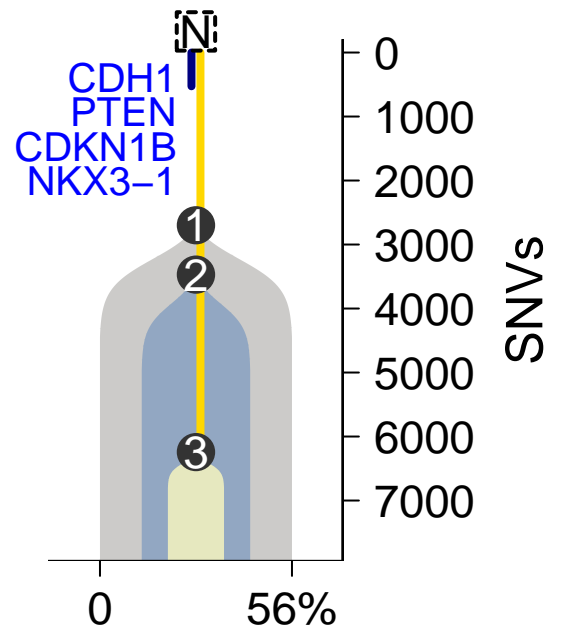

# CPCG0379

## SomaticSniper-Battenberg

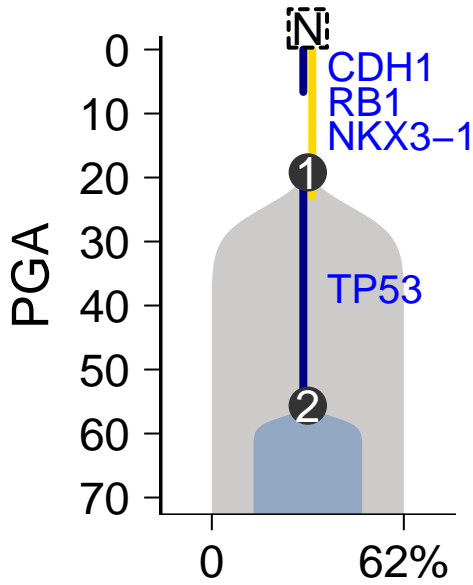

## SomaticSniper-TITAN

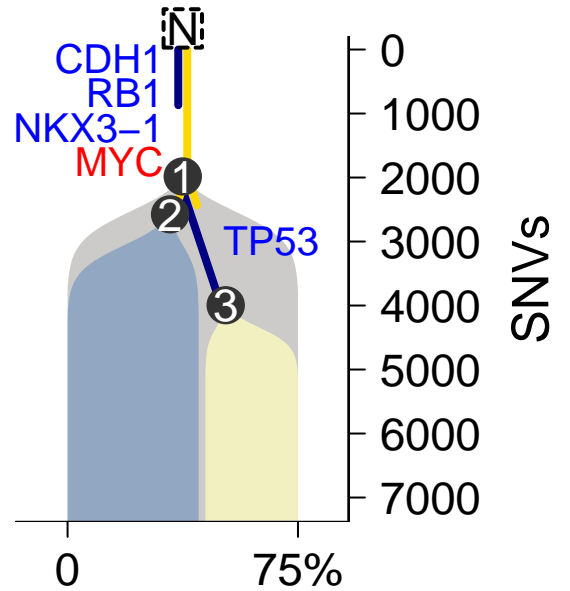

## MuTect-Battenberg

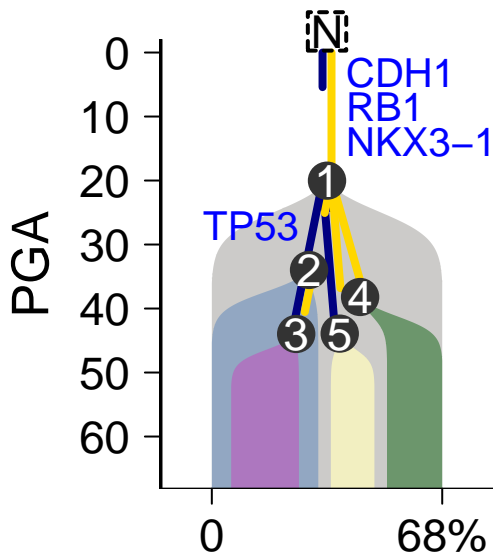

## MuTect-TITAN

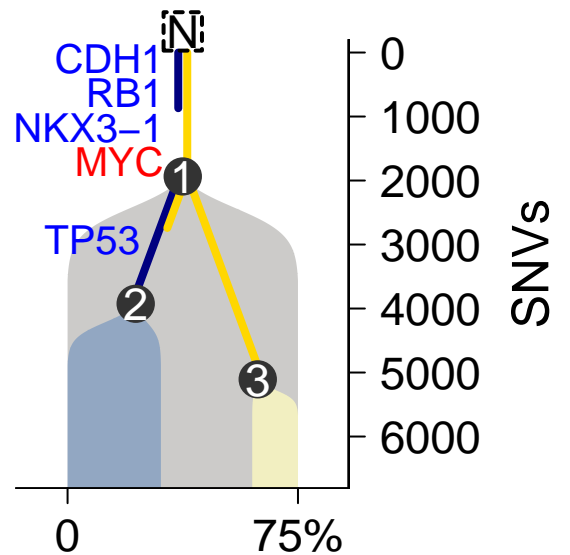

# CPCG0380

## SomaticSniper-Battenberg

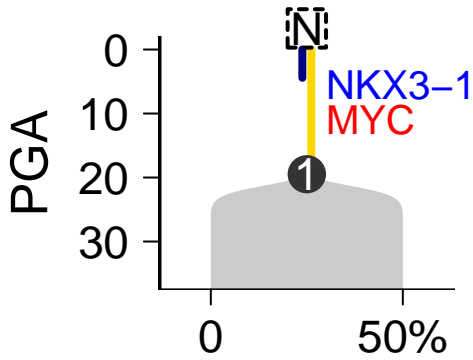

## SomaticSniper-TITAN

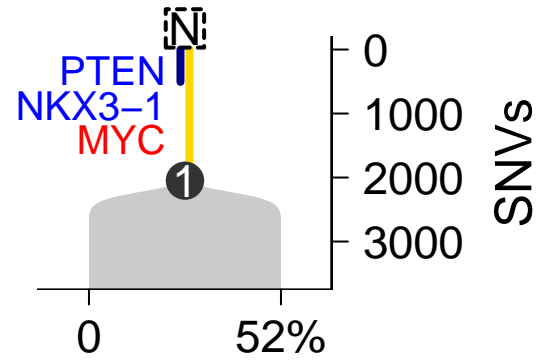

## MuTect-Battenberg

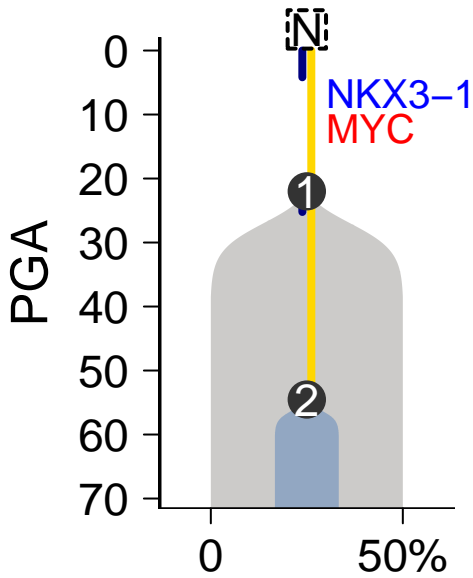

## MuTect-TITAN

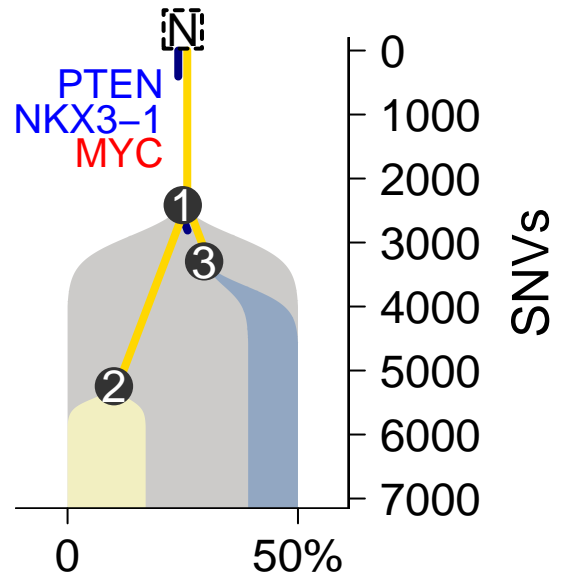

# CPCG0381

## SomaticSniper–Battenberg

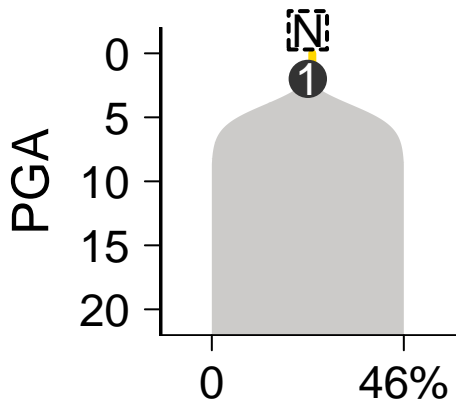

## SomaticSniper–TITAN

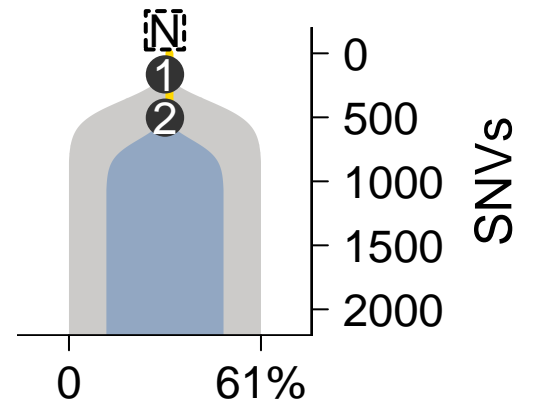

## MuTect–Battenberg

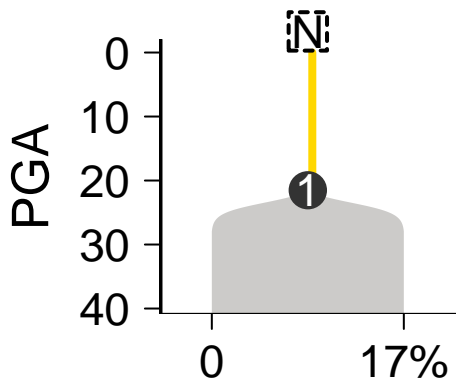

## MuTect–TITAN

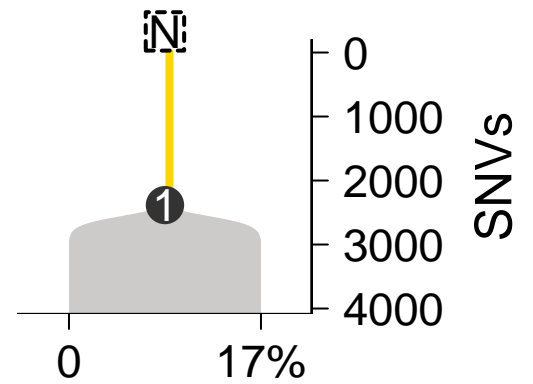

# CPCG0387

## SomaticSniper-Battenberg

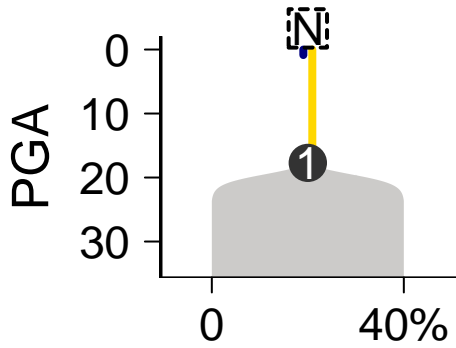

## SomaticSniper-TITAN

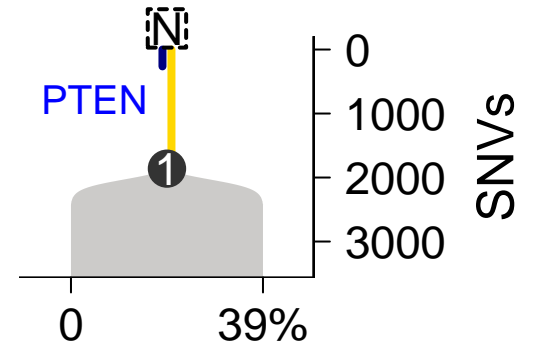

## MuTect-Battenberg

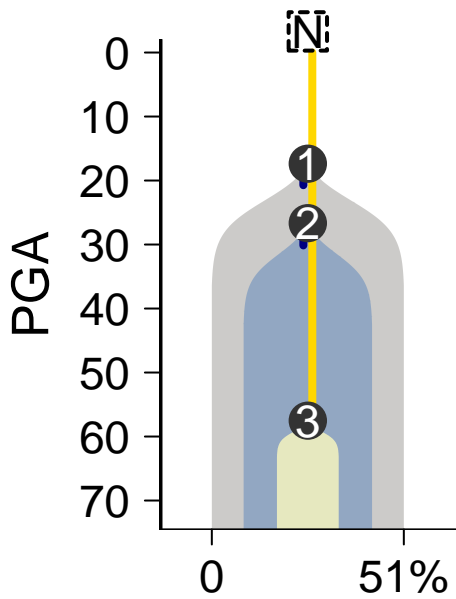

## MuTect-TITAN

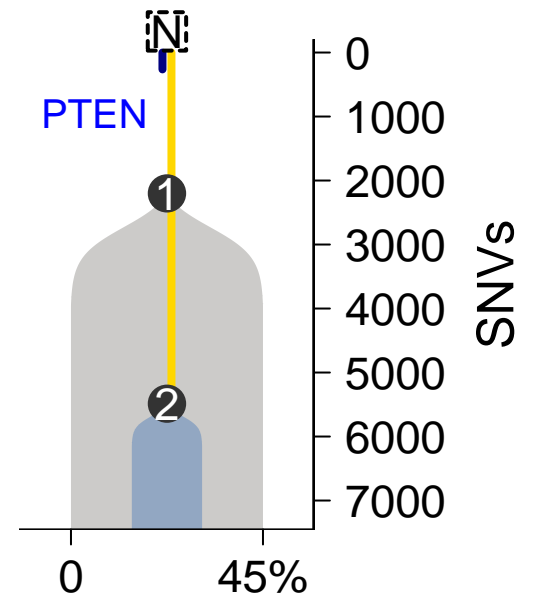

# CPCG0388

## SomaticSniper–Battenberg

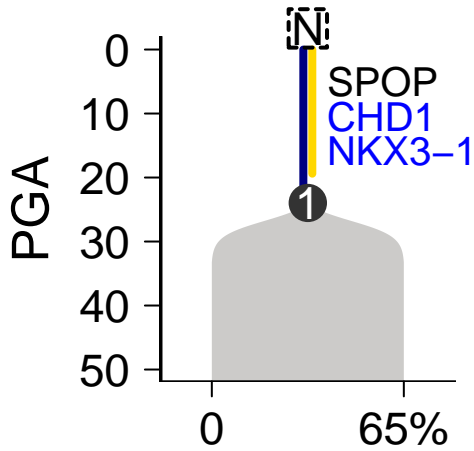

## SomaticSniper–TITAN

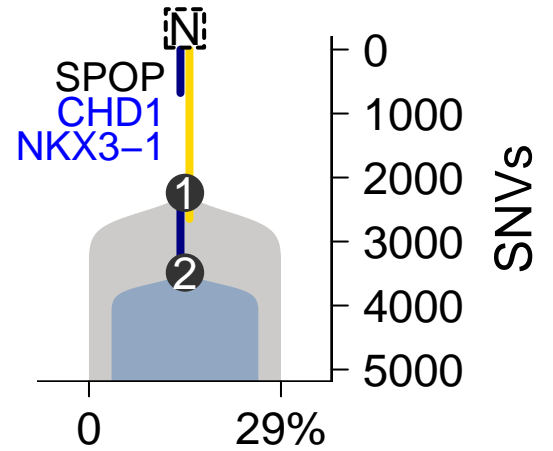

## MuTect–Battenberg

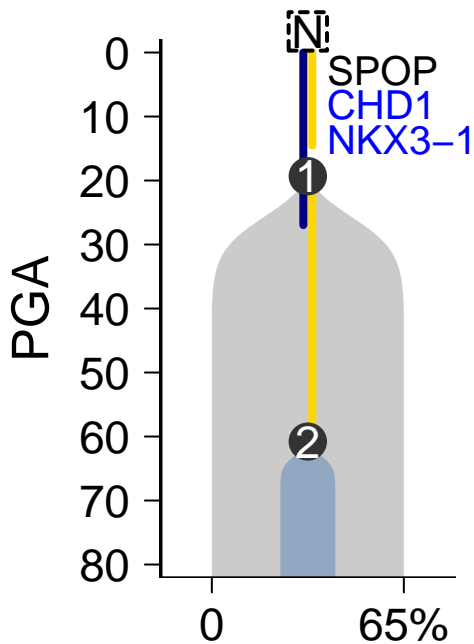

## MuTect–TITAN

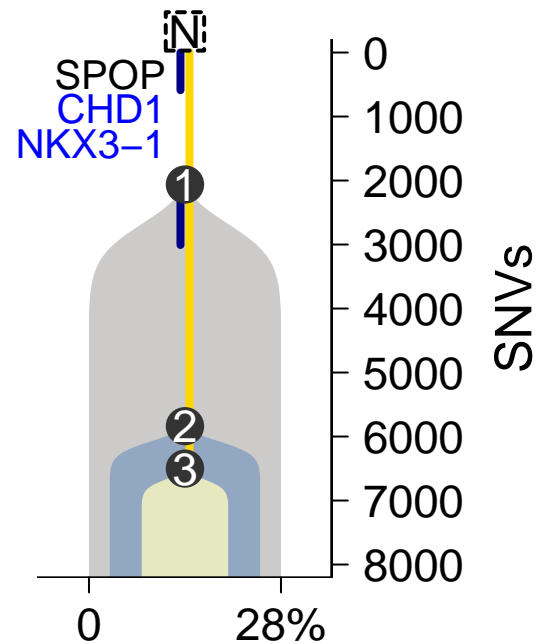

# CPCG0391

## SomaticSniper–Battenberg

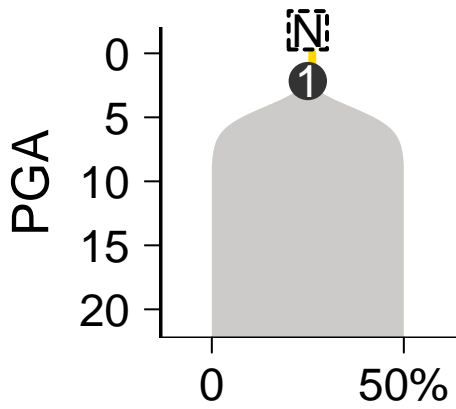

## SomaticSniper–TITAN

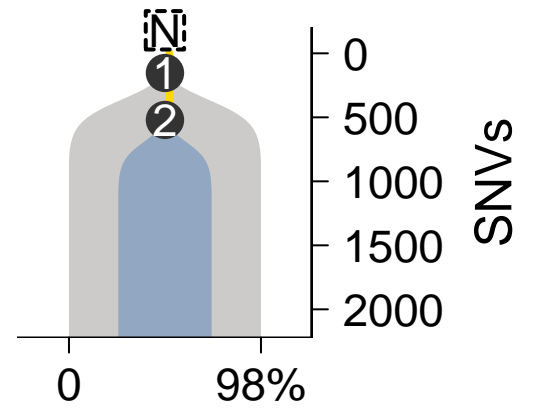

## MuTect–Battenberg

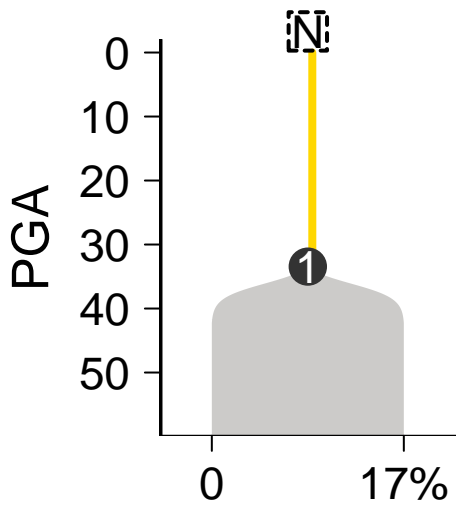

## MuTect–TITAN

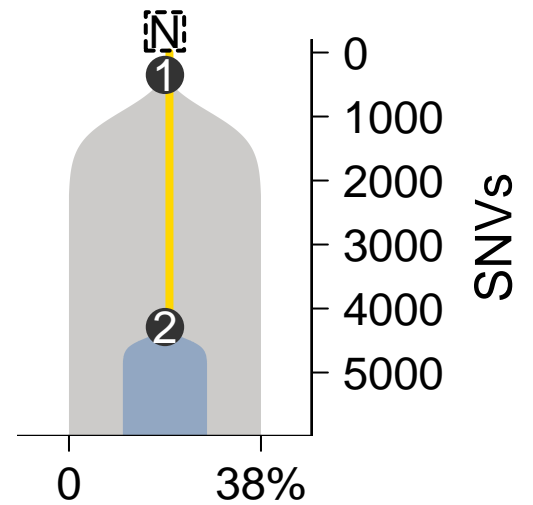

# CPCG0392

## SomaticSniper–Battenberg

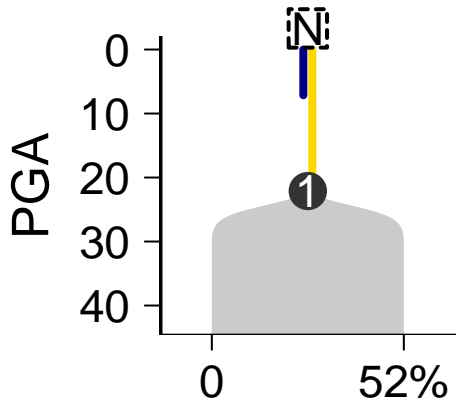

## SomaticSniper–TITAN

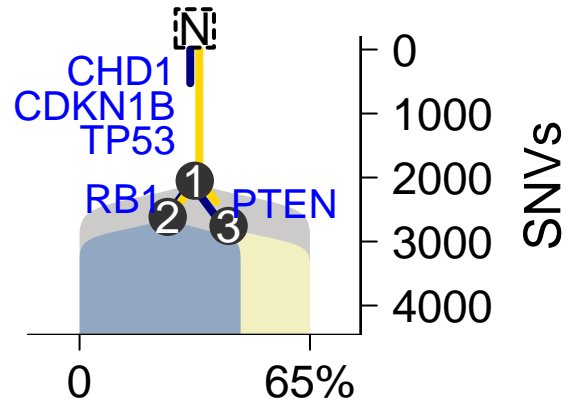

## MuTect–Battenberg

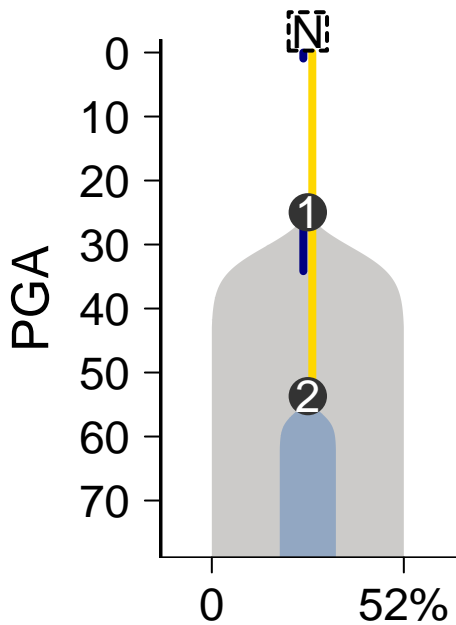

## MuTect–TITAN

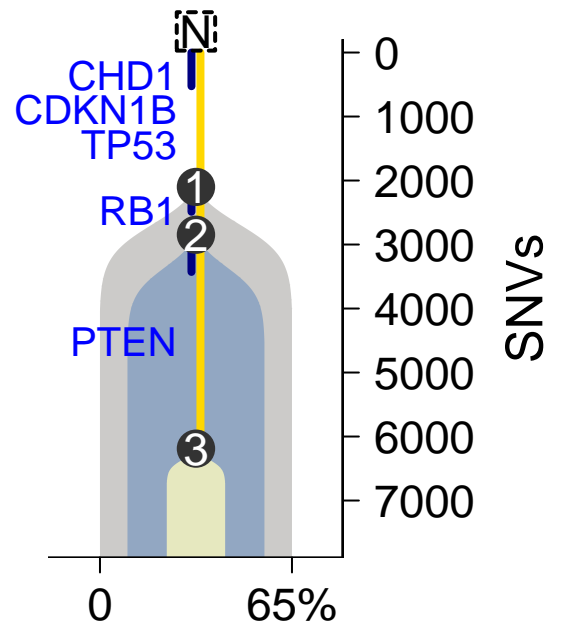



# CPCG0401

## SomaticSniper–Battenberg

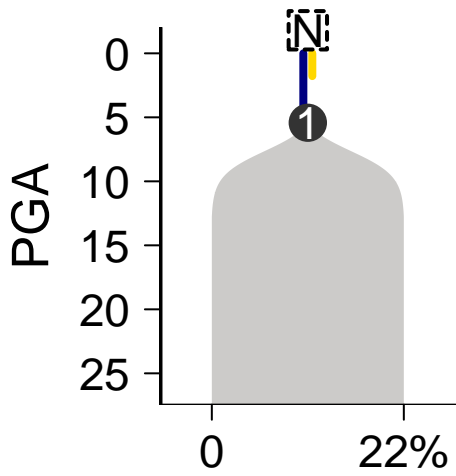

## SomaticSniper–TITAN

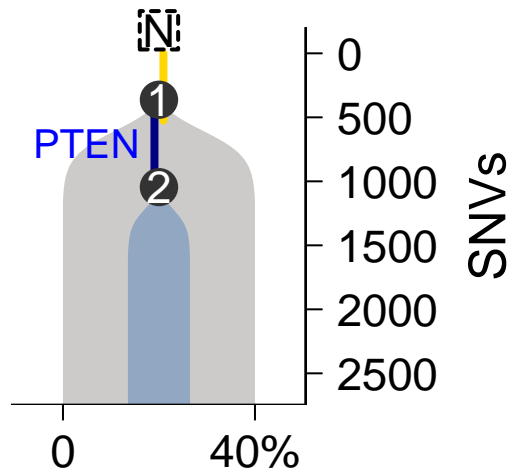

## MuTect–Battenberg

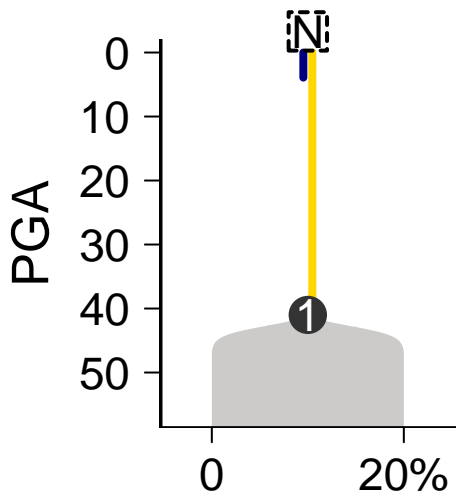

## MuTect–TITAN

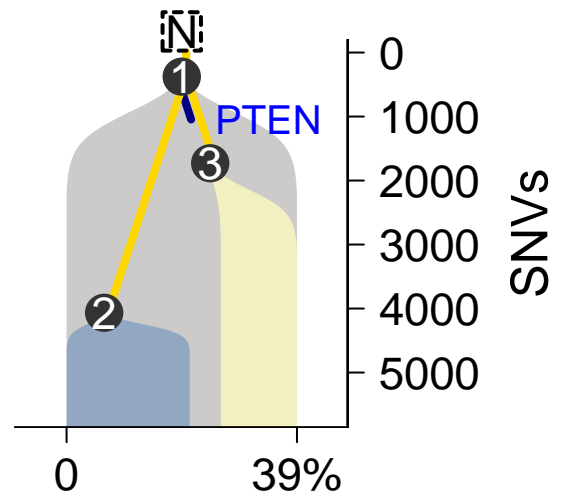

# CPCG0404

## SomaticSniper-Battenberg

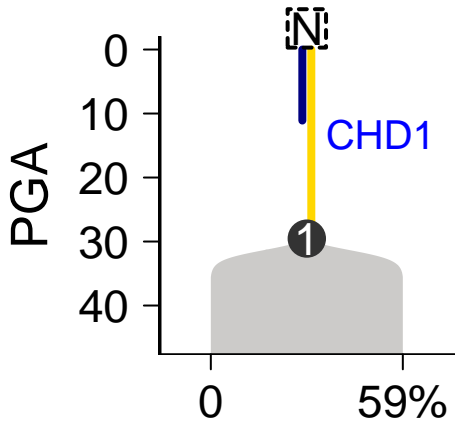

## SomaticSniper-TITAN

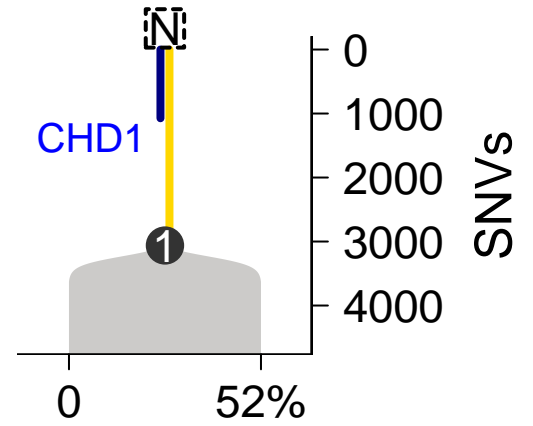

## MuTect-Battenberg

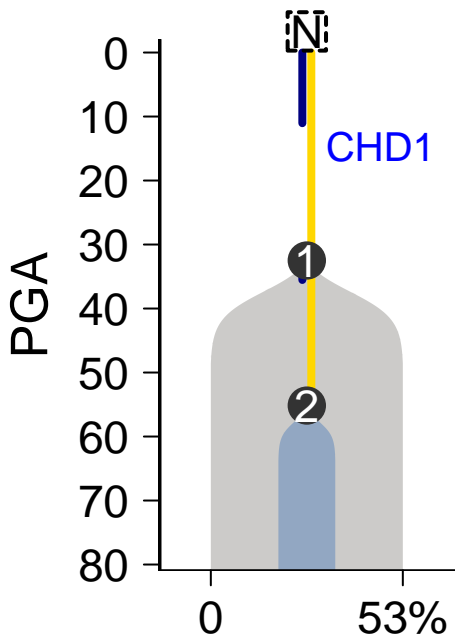

## MuTect-TITAN

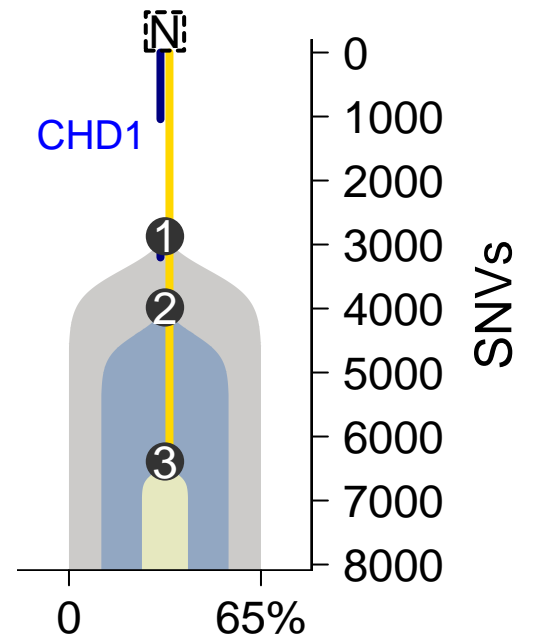

# CPCG0407

## SomaticSniper-Battenberg

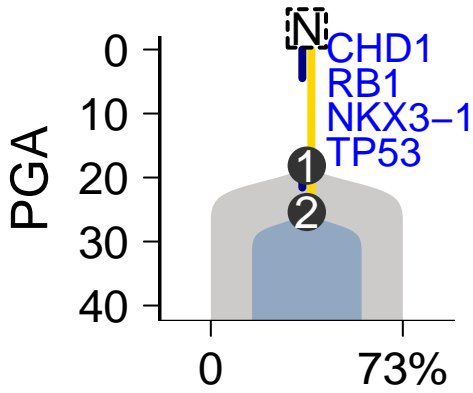

## SomaticSniper-TITAN

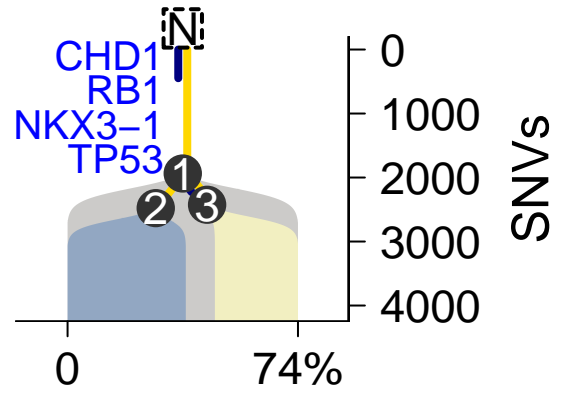

## MuTect-Battenberg

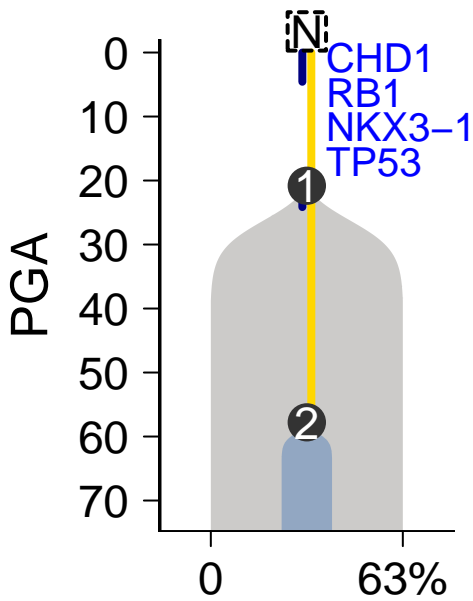

## MuTect-TITAN

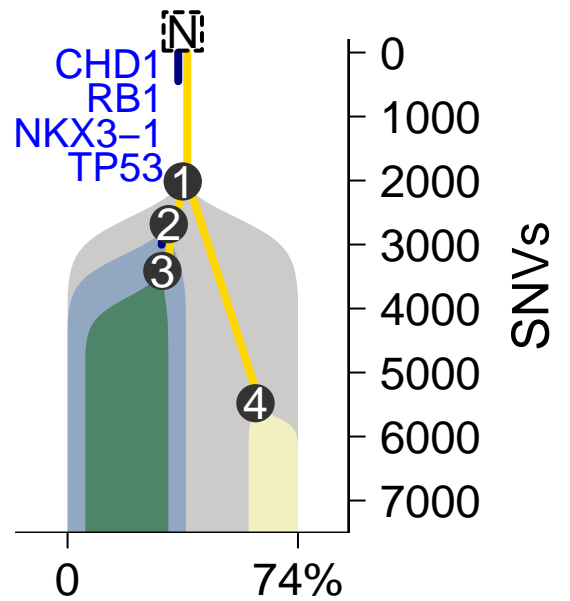

# CPCG0409

## SomaticSniper-Battenberg

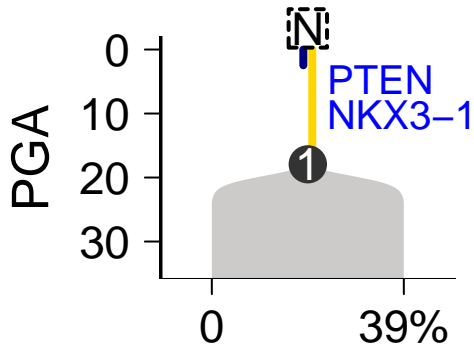

## SomaticSniper-TITAN

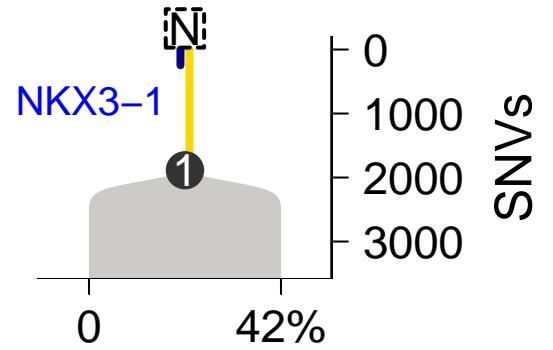

## MuTect-Battenberg

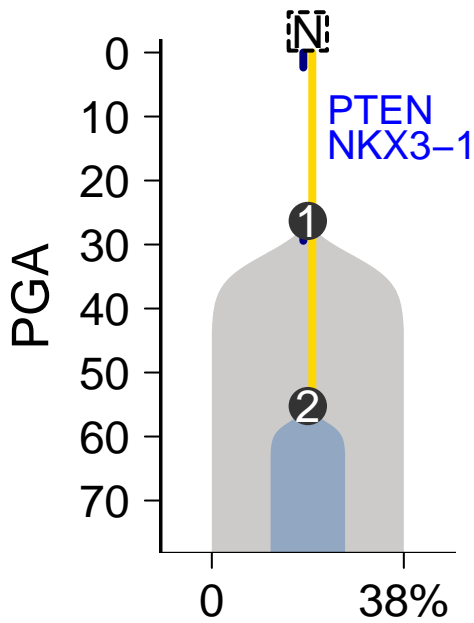

## MuTect-TITAN

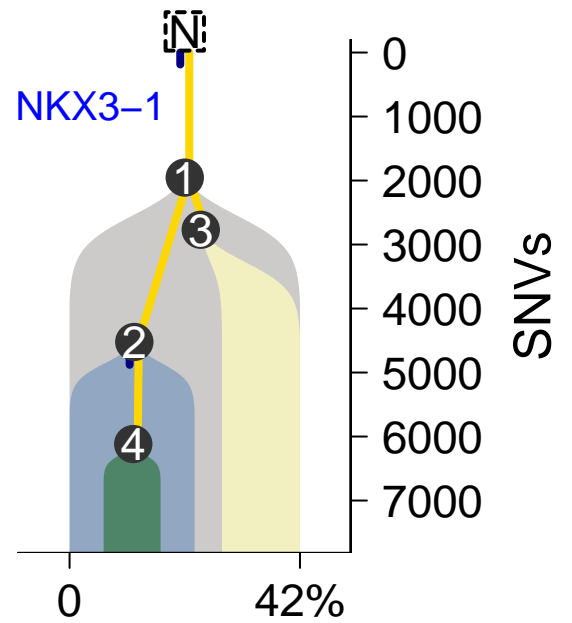

# CPCG0410

## SomaticSniper-Battenberg

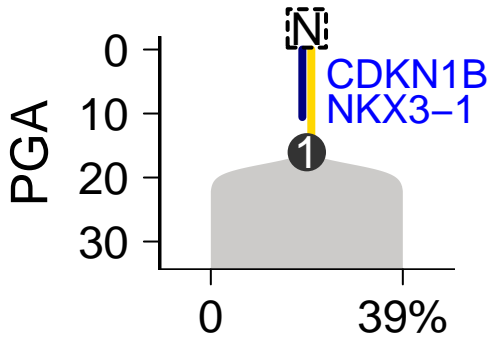

## SomaticSniper-TITAN

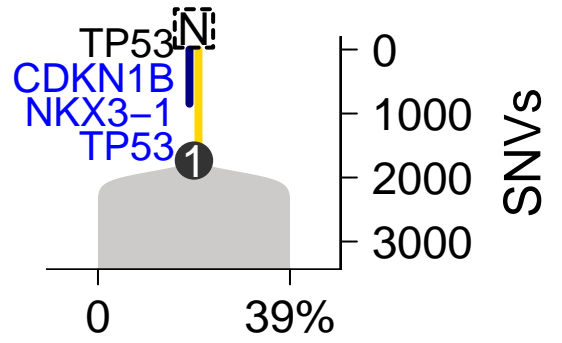

## MuTect-Battenberg

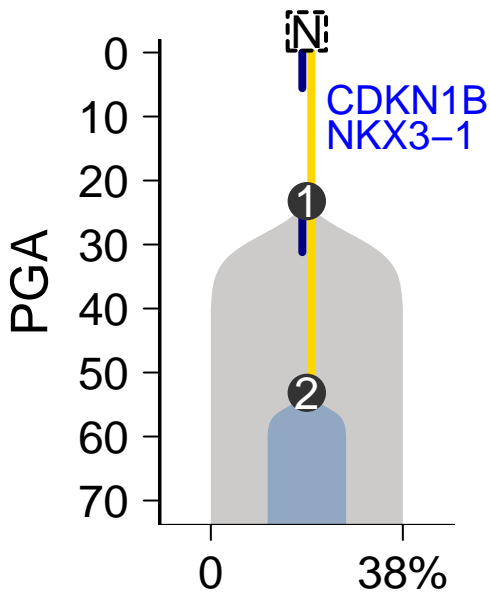

## MuTect-TITAN

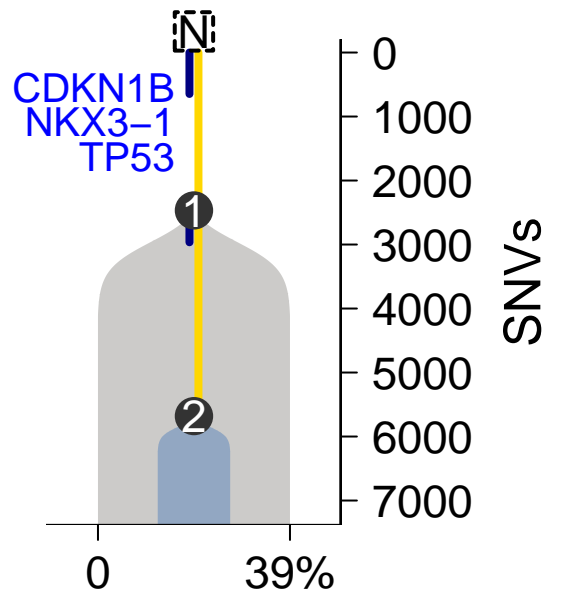

# CPCG0411

## SomaticSniper-Battenberg

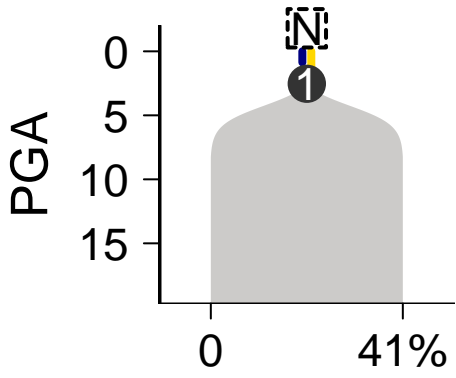

## SomaticSniper-TITAN

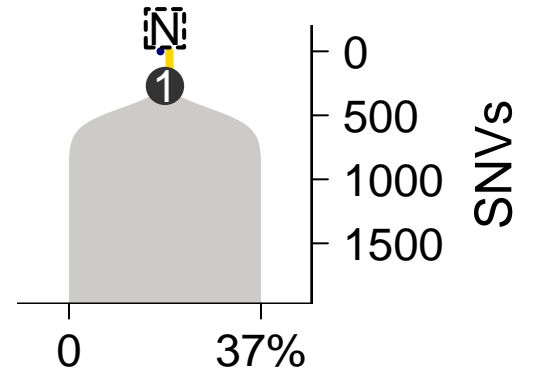

## MuTect-Battenberg

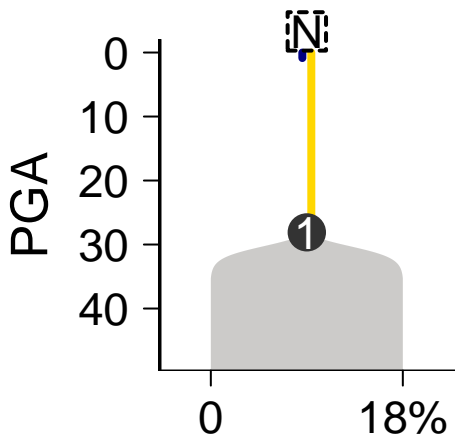

## MuTect-TITAN

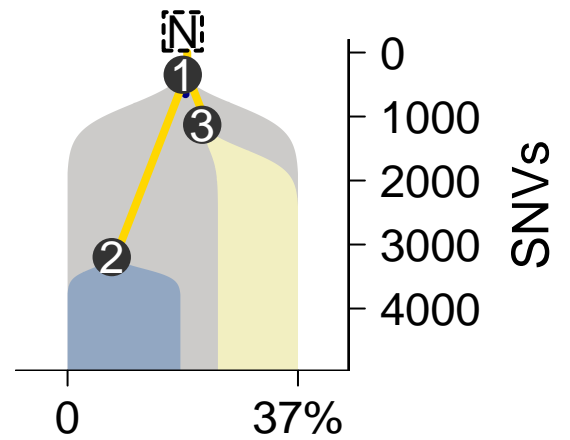

# CPCG0412

## SomaticSniper–Battenberg

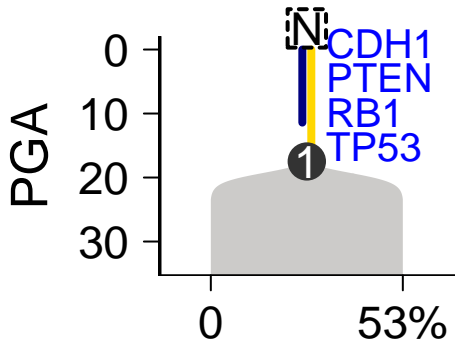

## SomaticSniper–TITAN

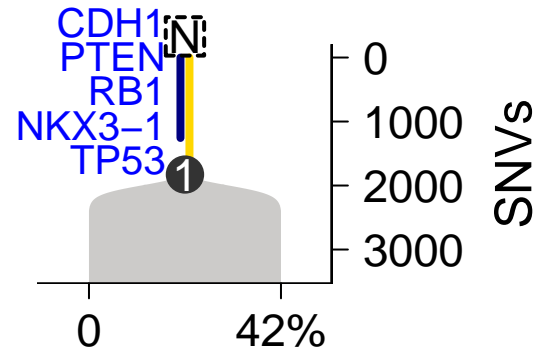

## MuTect–Battenberg

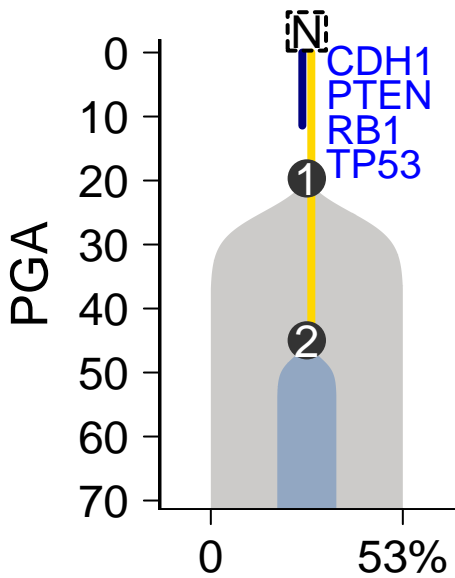

## MuTect–TITAN

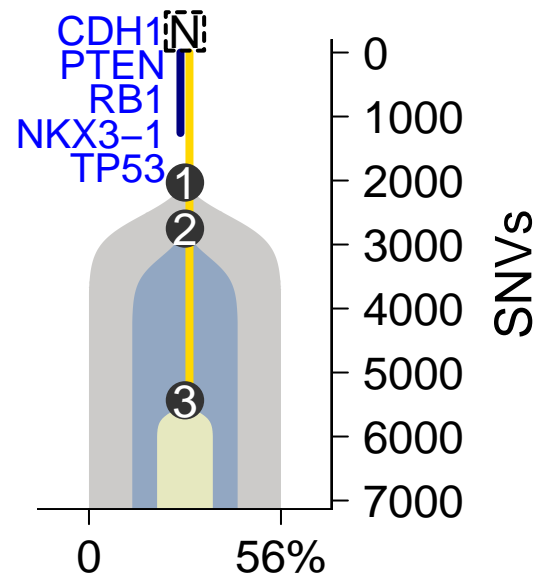

# CPCG0413

## SomaticSniper-Battenberg

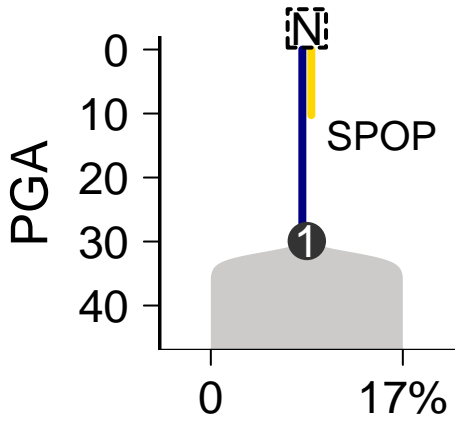

## SomaticSniper-TITAN

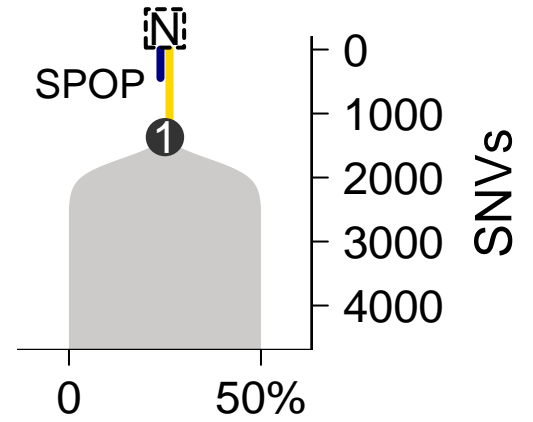

## MuTect-Battenberg

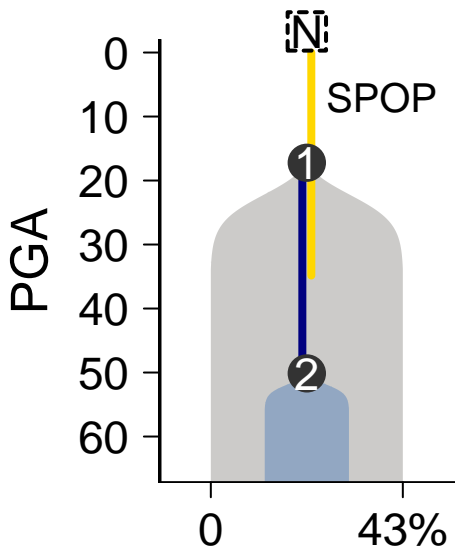

## MuTect-TITAN

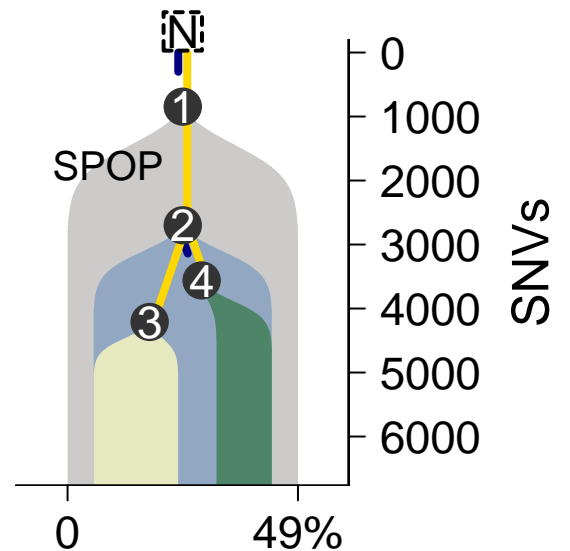



# CPCG0414

## SomaticSniper-Battenberg

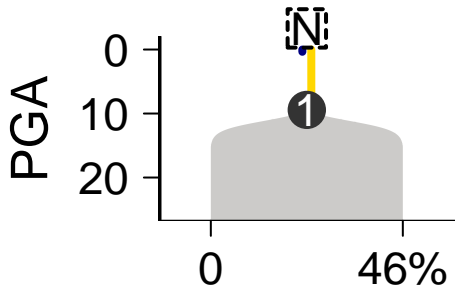

## SomaticSniper-TITAN

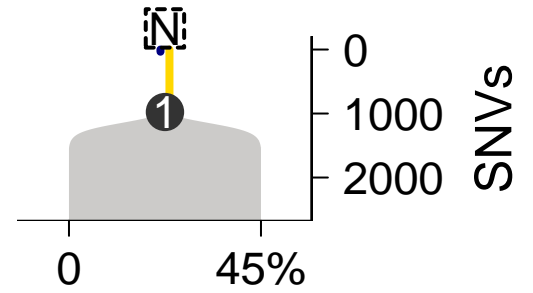

## MuTect-Battenberg

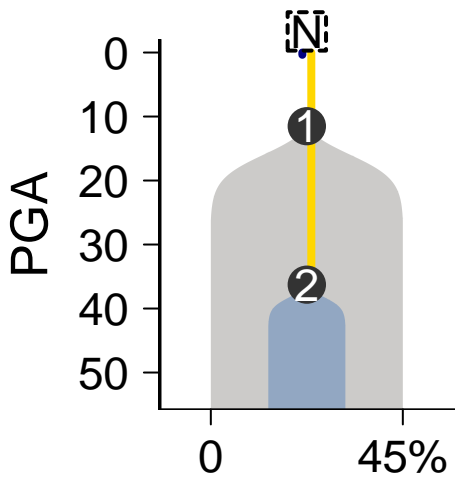

## MuTect-TITAN

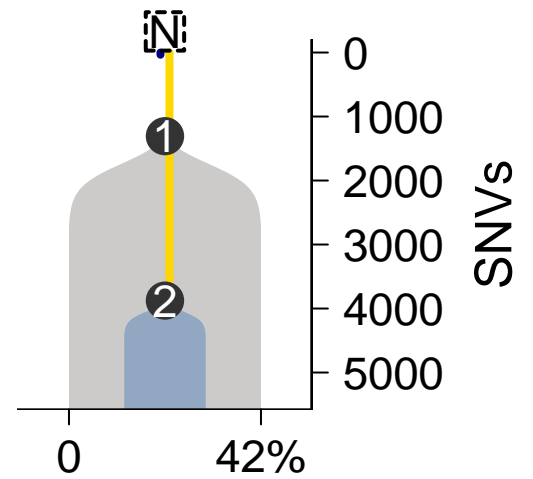

# CPCG0424

## SomaticSniper-TITAN

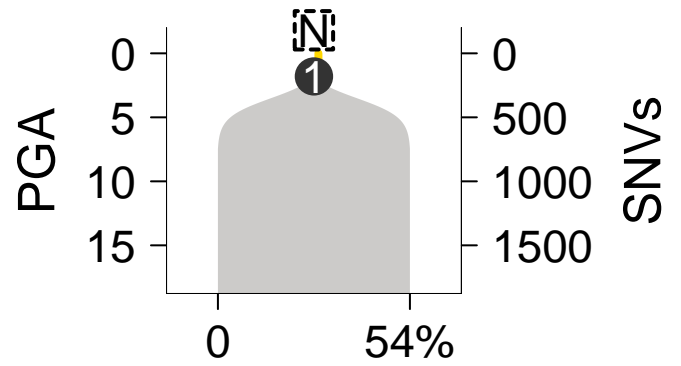

## MuTect-Battenberg

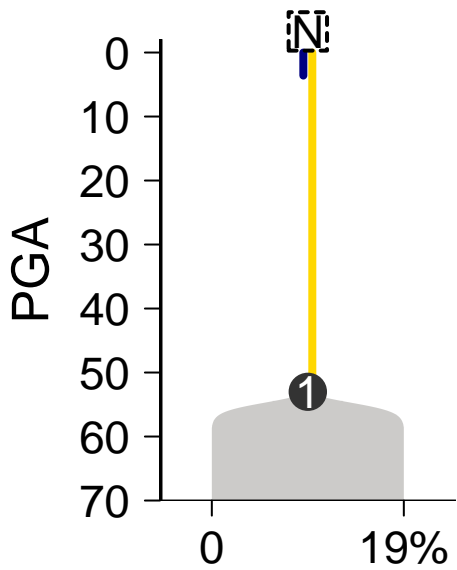

## MuTect-TITAN

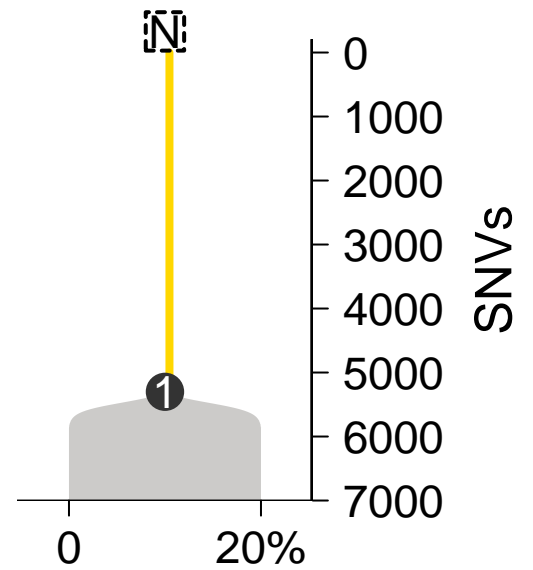

# CPCG0432

## SomaticSniper-Battenberg

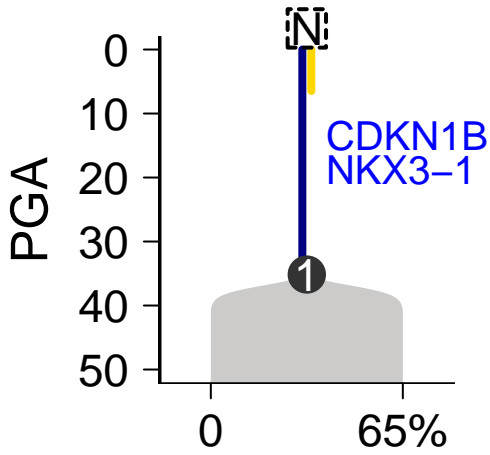

## SomaticSniper-TITAN

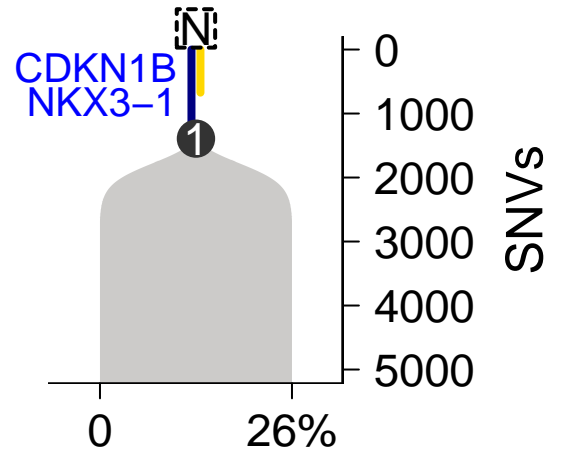

## MuTect-Battenberg

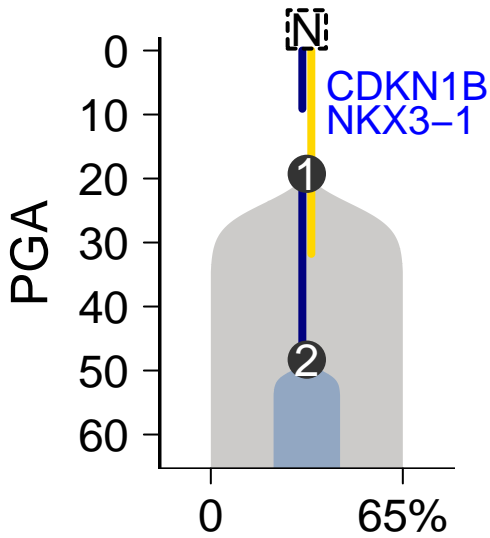

## MuTect-TITAN

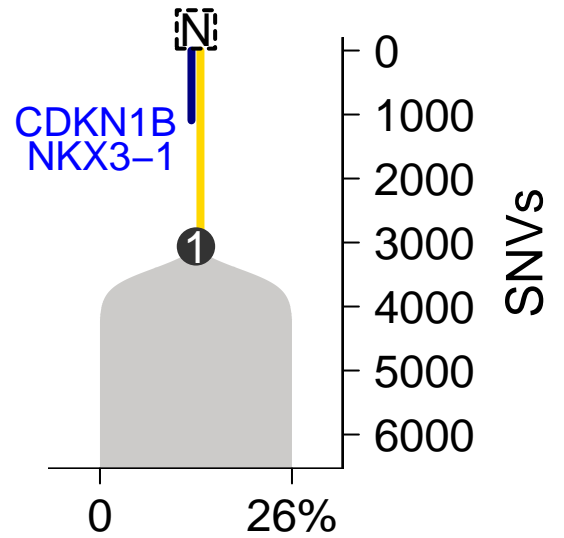

# CPCG0433

## SomaticSniper–Battenberg

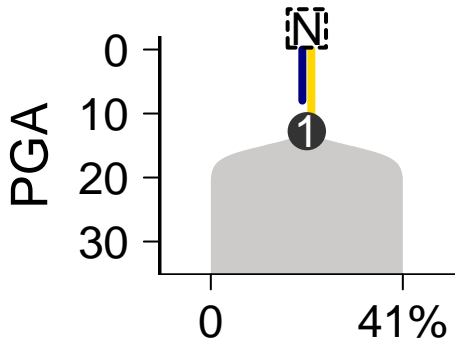

## SomaticSniper–TITAN

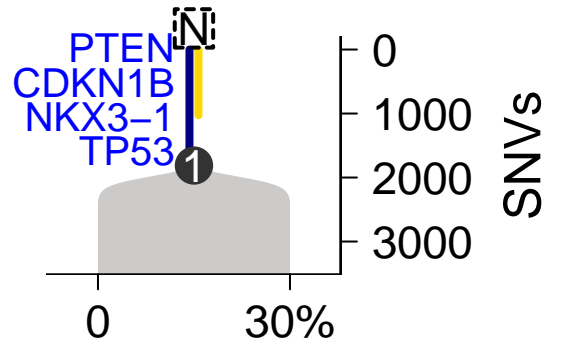

## MuTect–Battenberg

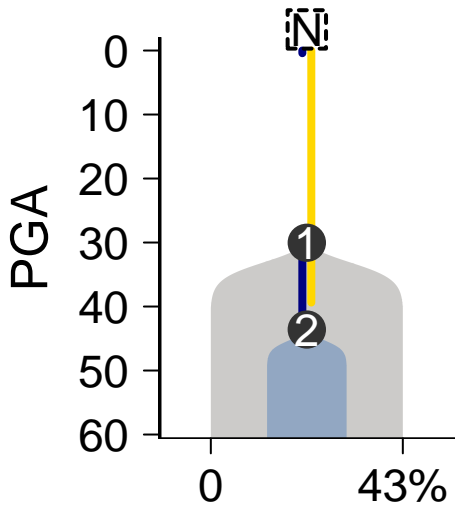

## MuTect–TITAN

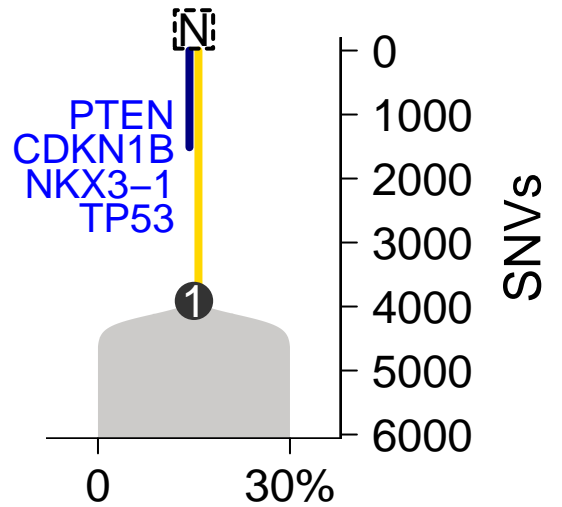

# CPCG0437

## SomaticSniper-Battenberg

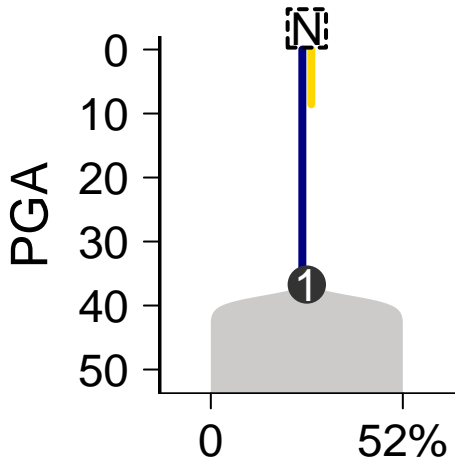

## SomaticSniper-TITAN

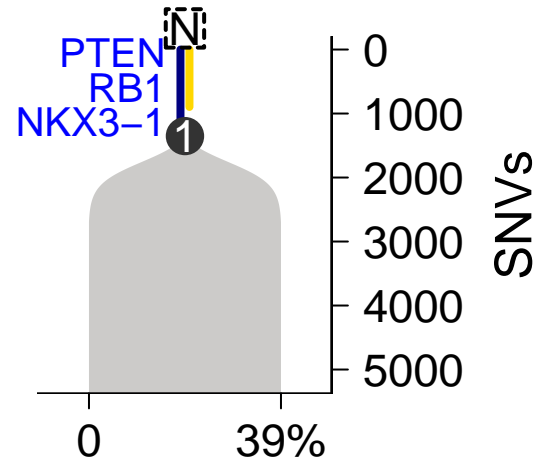

## MuTect-Battenberg

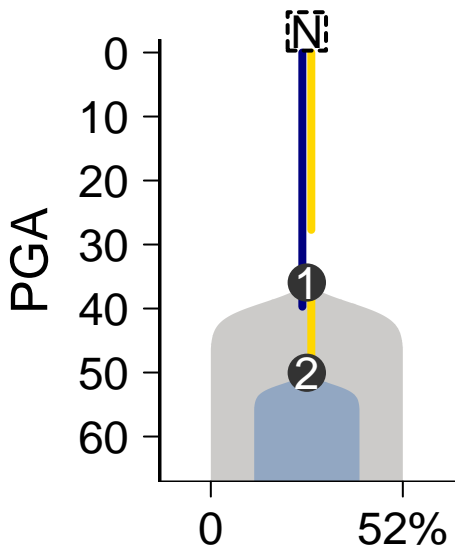

## MuTect-TITAN

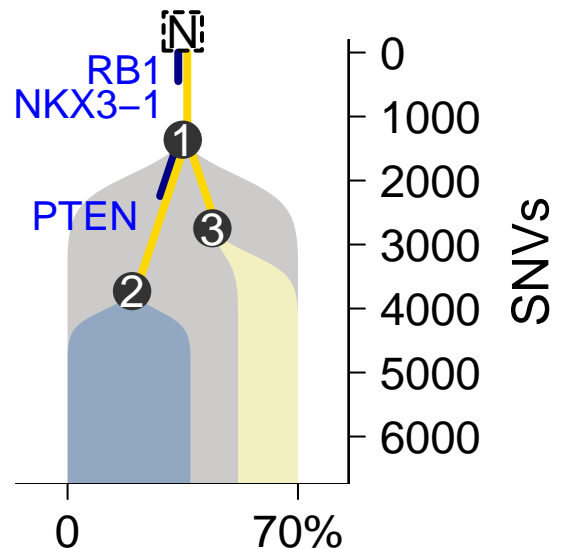

# CPCG0450

## SomaticSniper-Battenberg

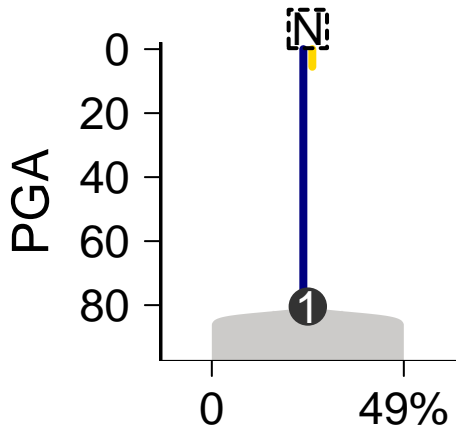

## SomaticSniper-TITAN

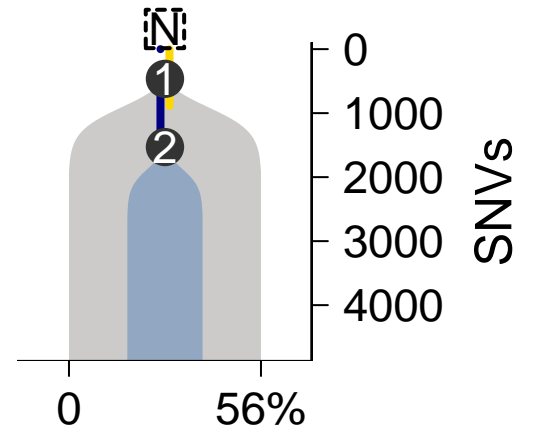

## MuTect-Battenberg

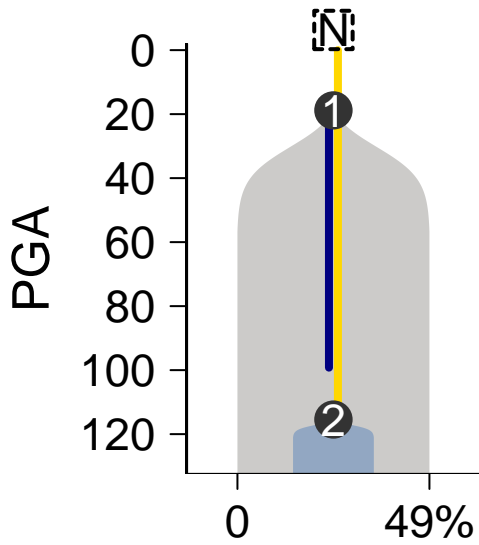

## MuTect-TITAN

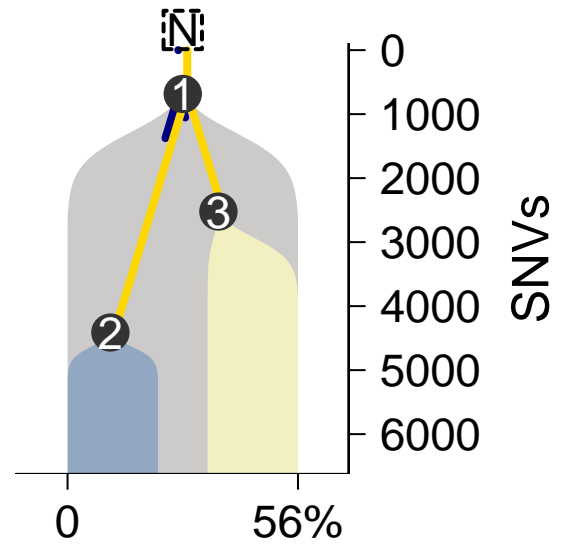

# CPCG0451

## SomaticSniper-Battenberg

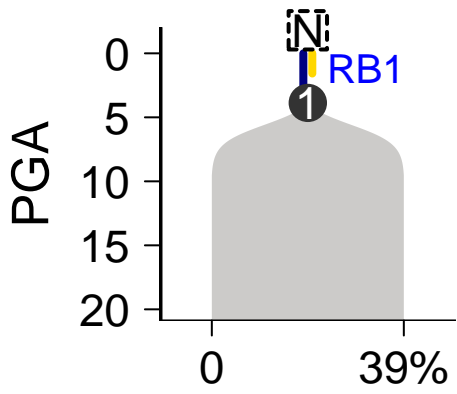

## SomaticSniper-TITAN

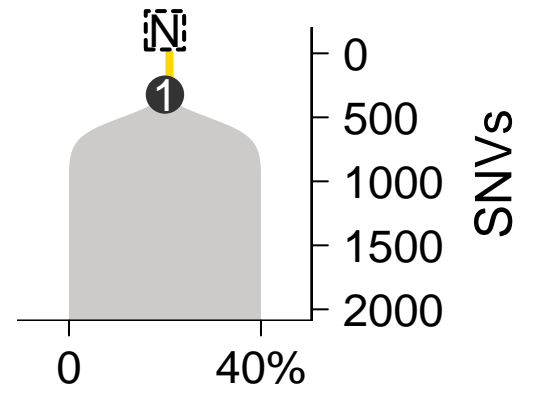

## MuTect-Battenberg

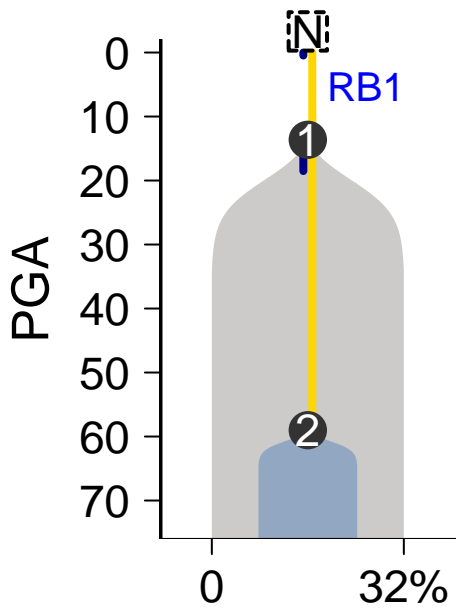

## MuTect-TITAN

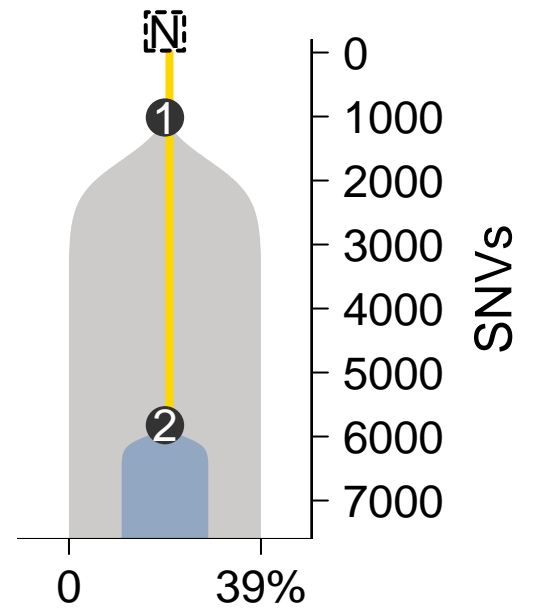

# CPCG0452

## SomaticSniper-Battenberg

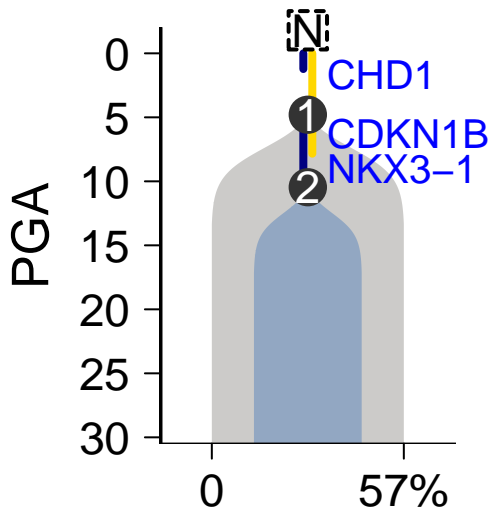

## SomaticSniper-TITAN

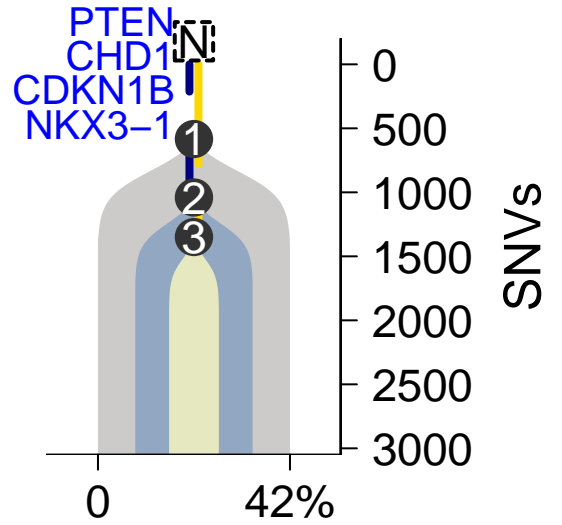

## MuTect-Battenberg

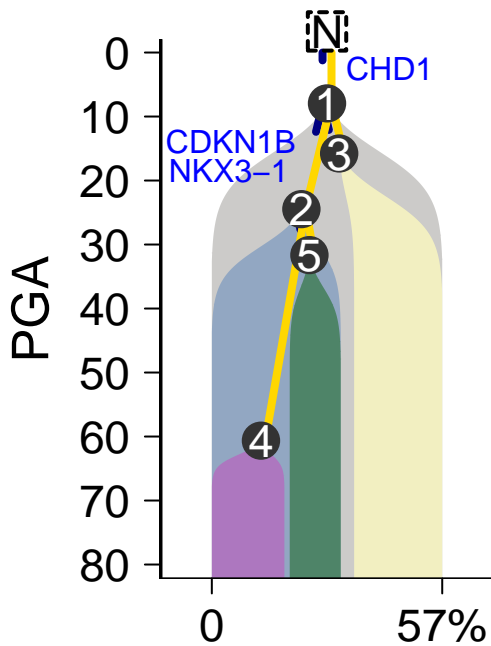

## MuTect-TITAN

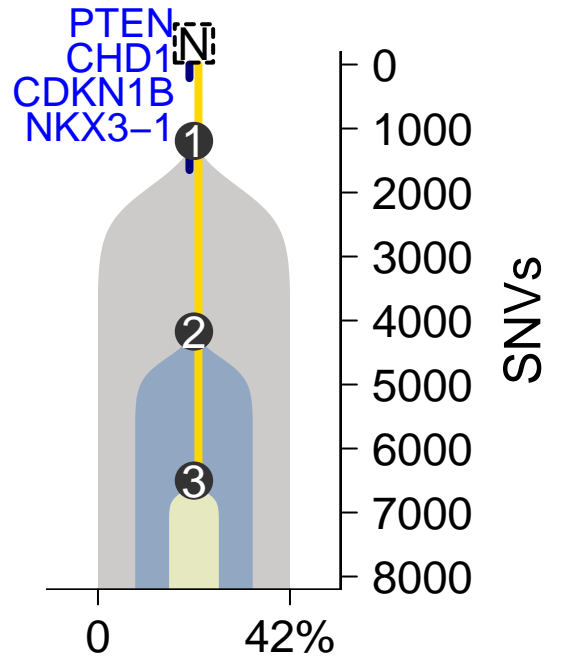



# CPCG0454

## SomaticSniper-Battenberg

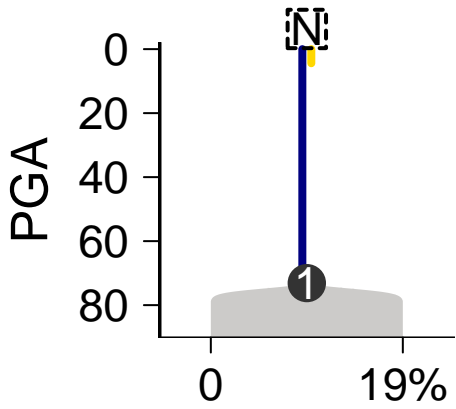

## SomaticSniper-TITAN

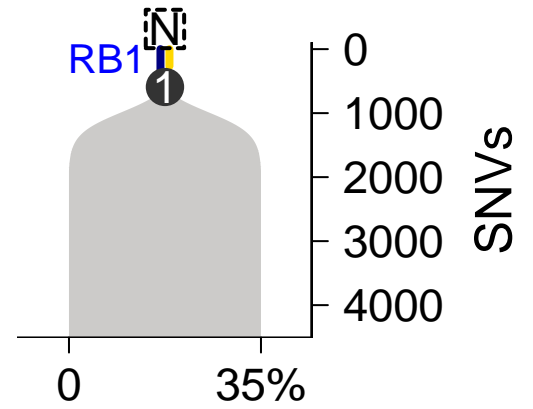

## MuTect-Battenberg

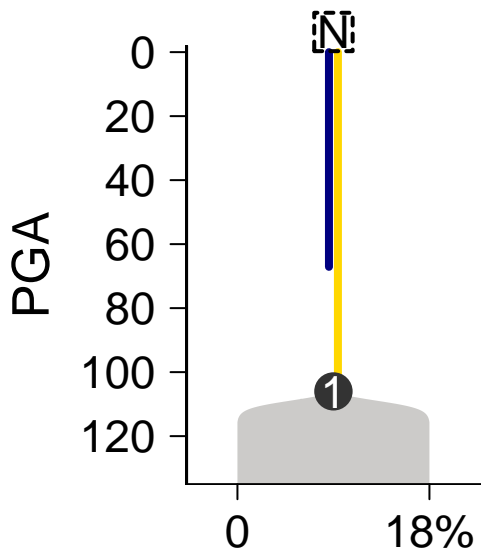

## MuTect-TITAN

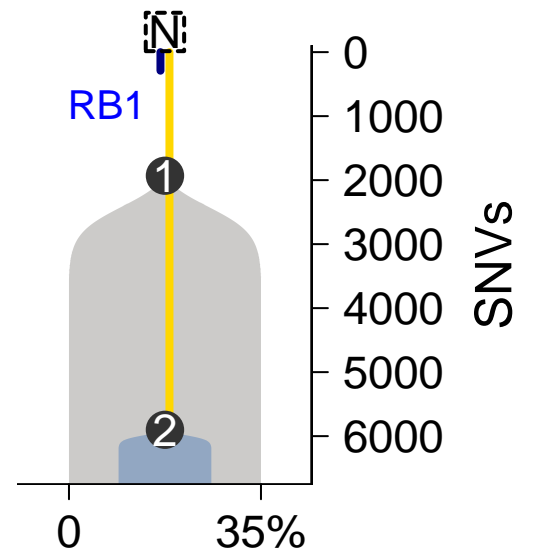

# CPCG0458

## SomaticSniper–Battenberg

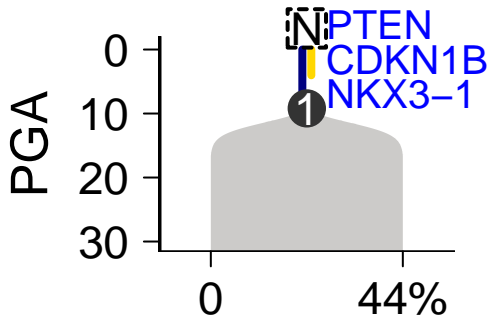

## SomaticSniper–TITAN

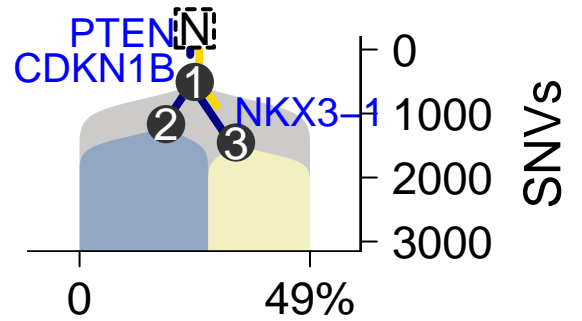

## MuTect–Battenberg

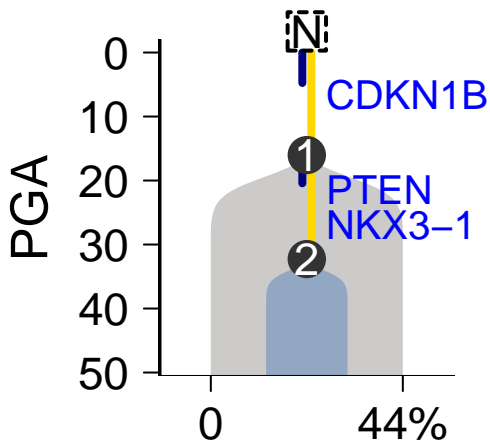

## MuTect–TITAN

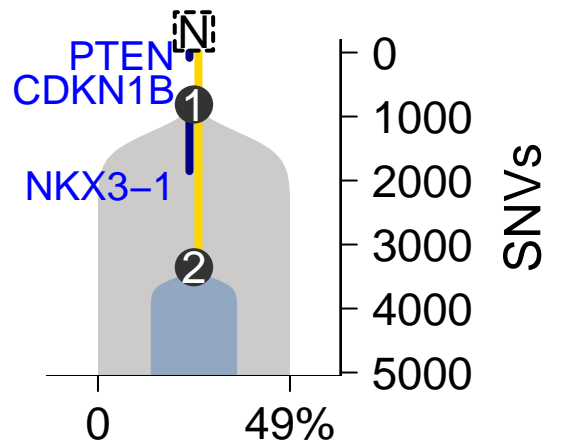

# CPCG0492

## SomaticSniper-Battenberg

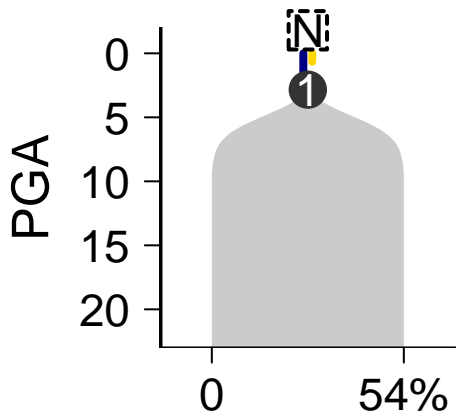

## SomaticSniper-TITAN

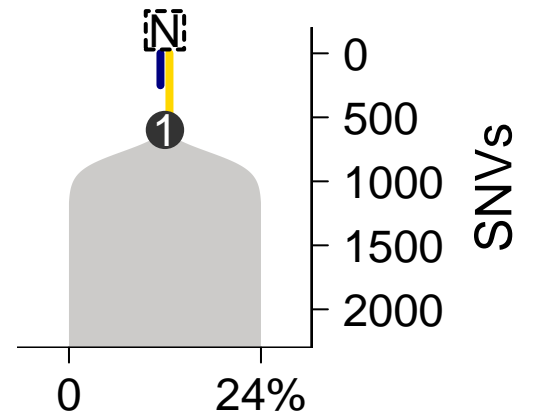

## MuTect-Battenberg

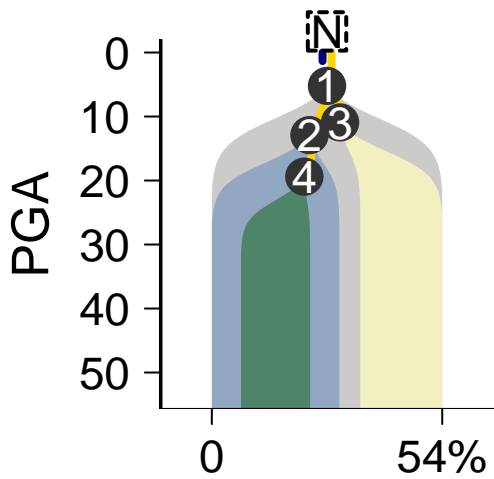

## MuTect-TITAN

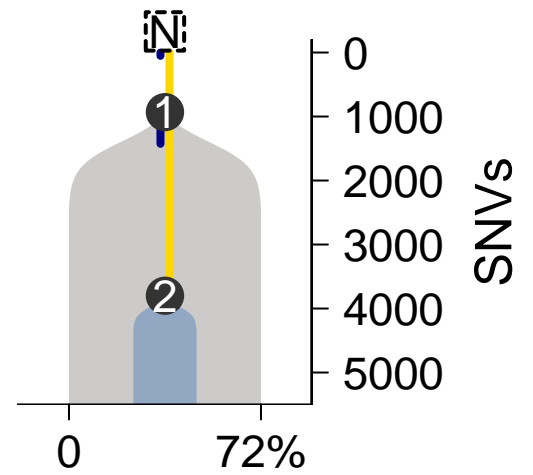

# CPCG0520

SomaticSniper-Battenberg

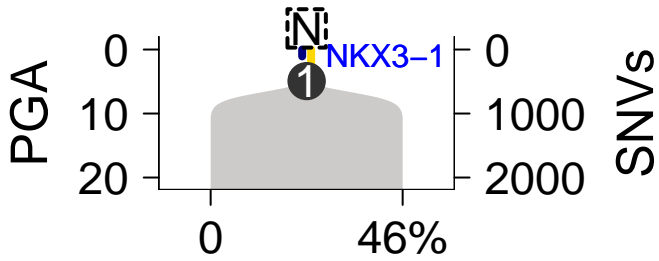

SomaticSniper-TITAN

Poly-tumour

MuTect-Battenberg

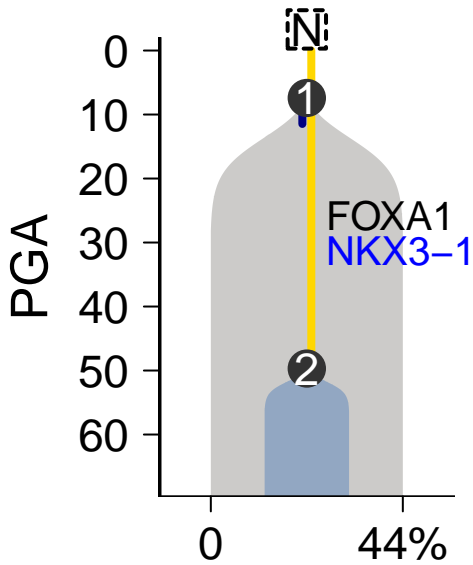

MuTect-TITAN

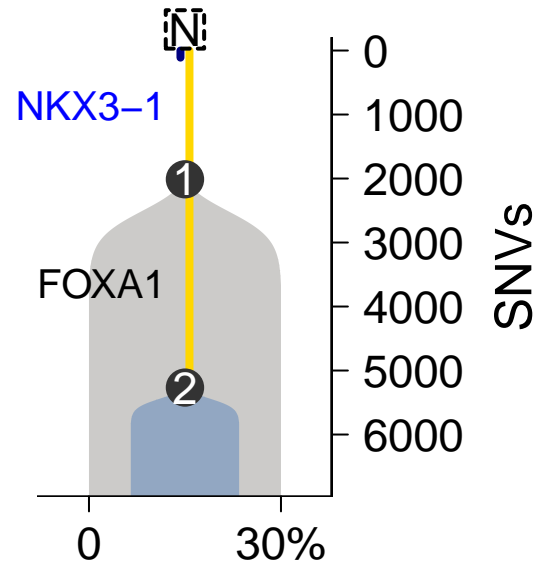

# CPCG0525

## SomaticSniper-Battenberg

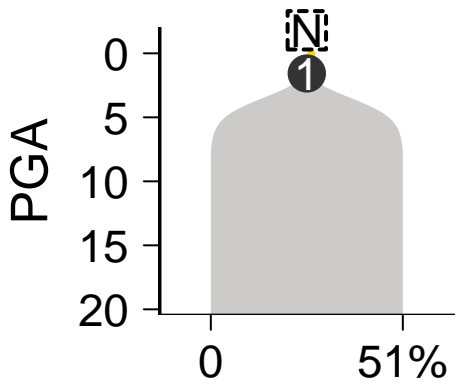

## SomaticSniper-TITAN

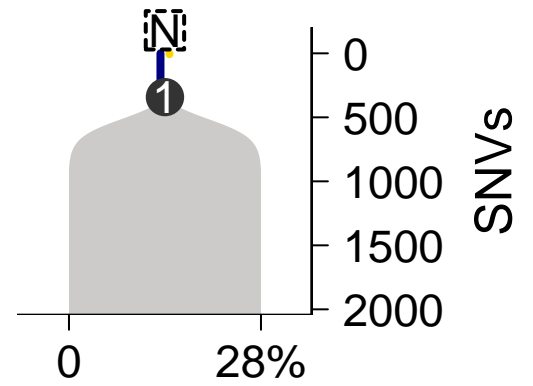

## MuTect-Battenberg

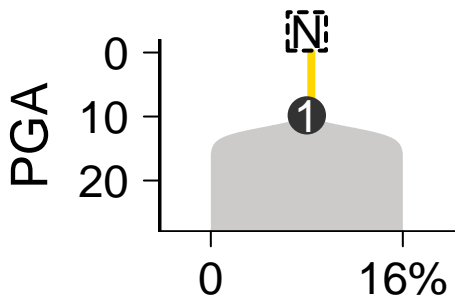

## MuTect-TITAN

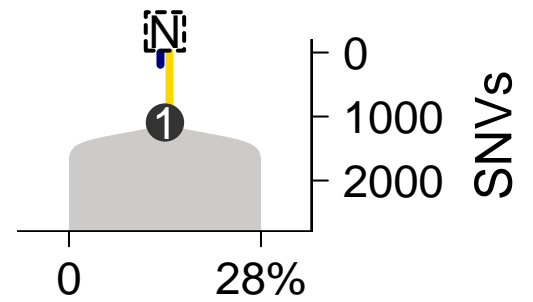

# CPCG0528

## SomaticSniper-Battenberg

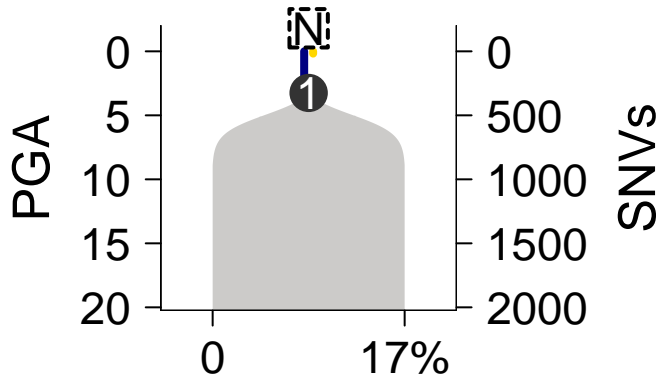

## SomaticSniper-TITAN

Poly-tumour

## MuTect-Battenberg

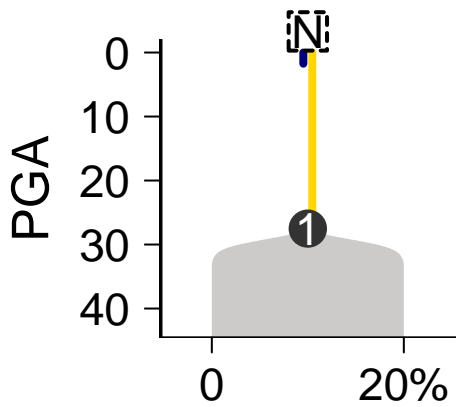

## MuTect-TITAN

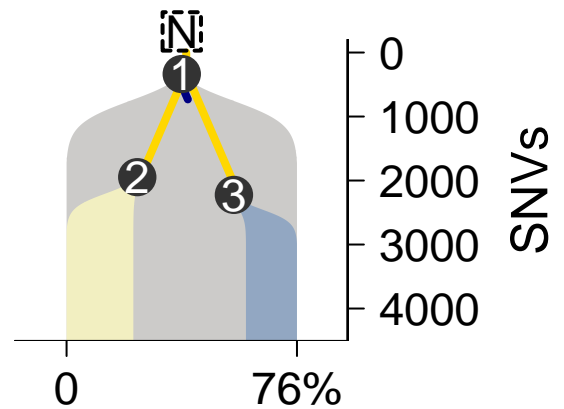

# CPCG0529

## SomaticSniper-Battenberg

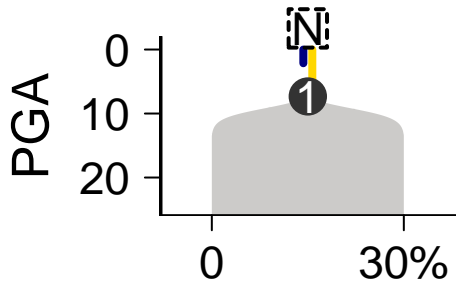

## SomaticSniper-TITAN

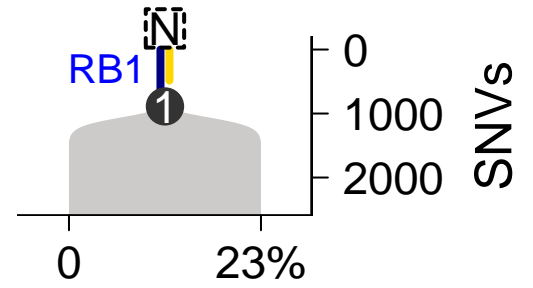

## MuTect-Battenberg

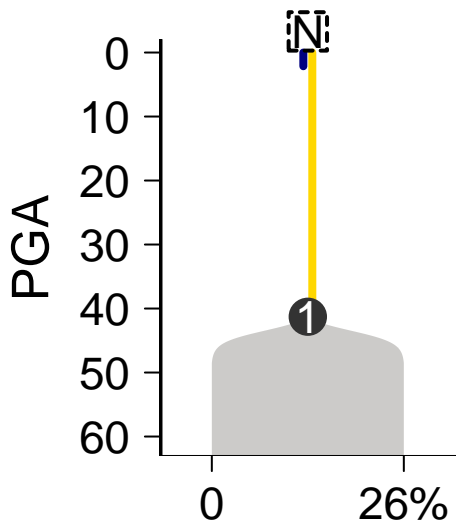

## MuTect-TITAN

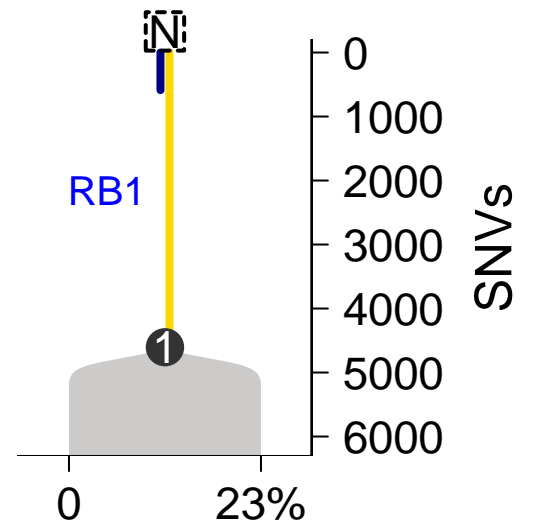

# CPCG0547

## SomaticSniper-Battenberg

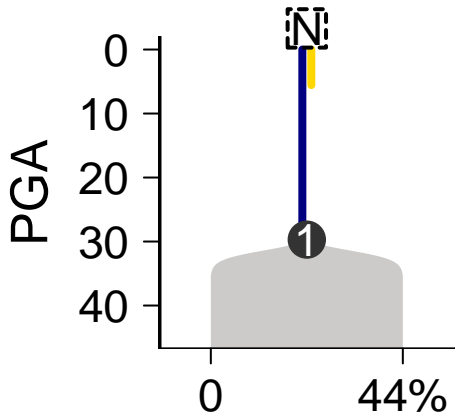

## SomaticSniper-TITAN

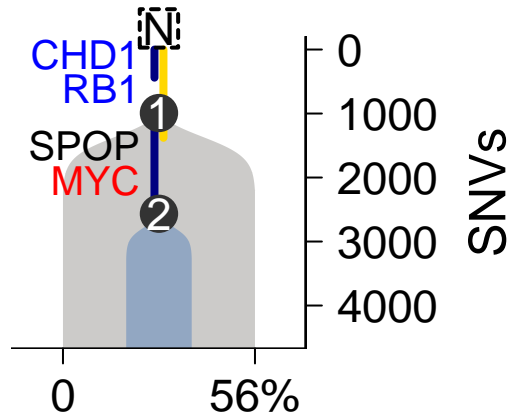

## MuTect-Battenberg

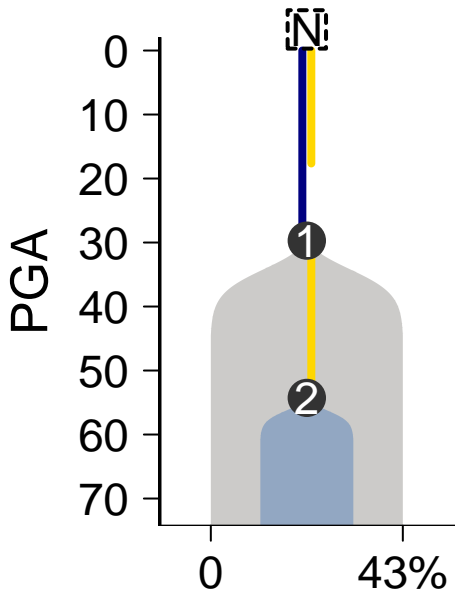

## MuTect-TITAN

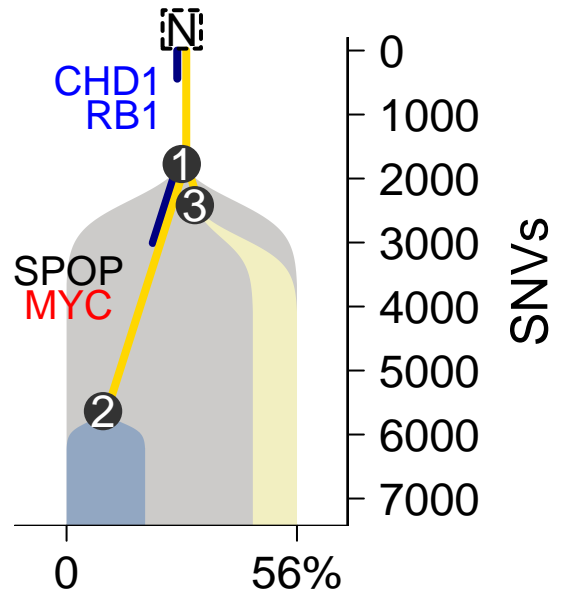



# CPCG0550

## SomaticSniper-Battenberg

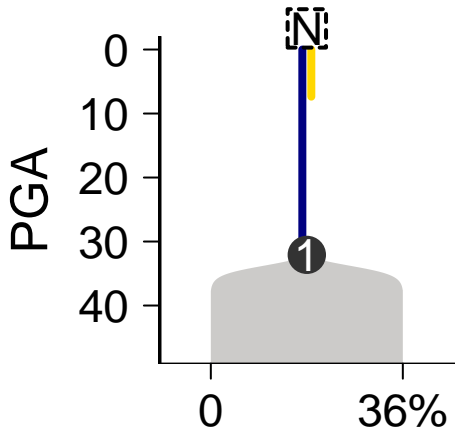

## SomaticSniper-TITAN

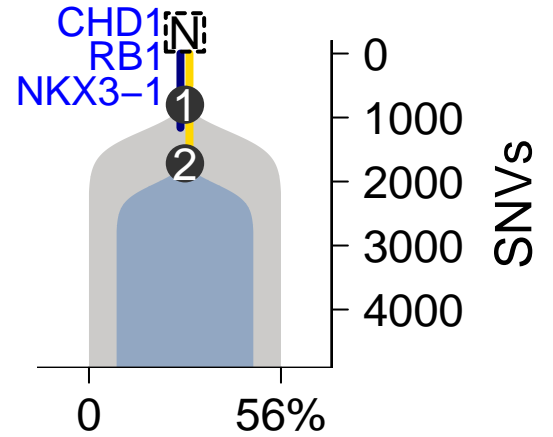

## MuTect-Battenberg

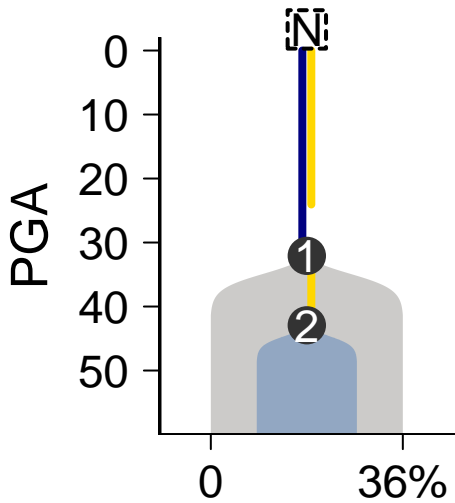

## MuTect-TITAN

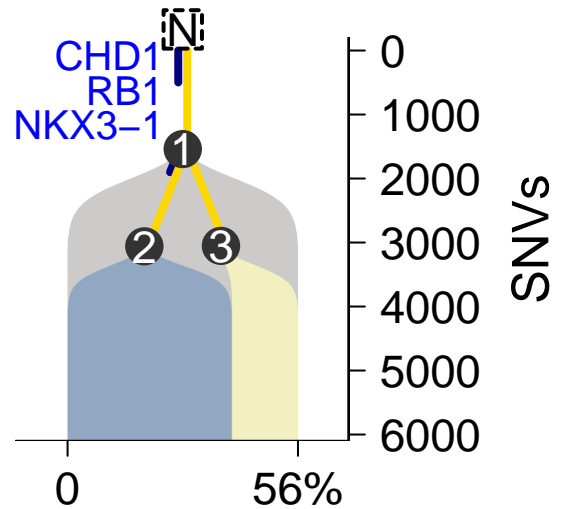

# CPCG0551

## SomaticSniper-Battenberg

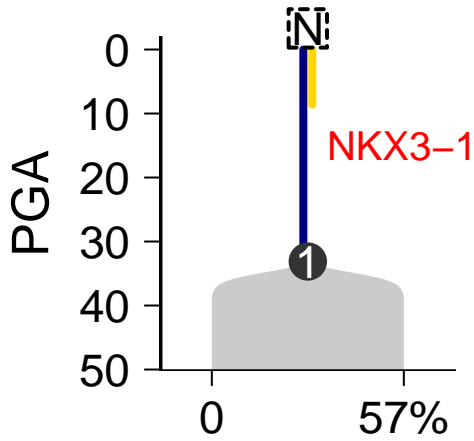

## SomaticSniper-TITAN

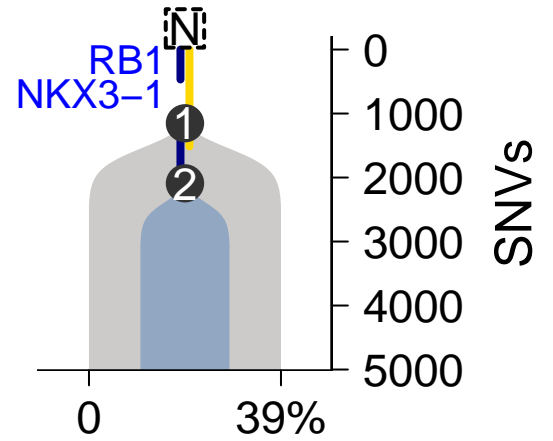

## MuTect-Battenberg

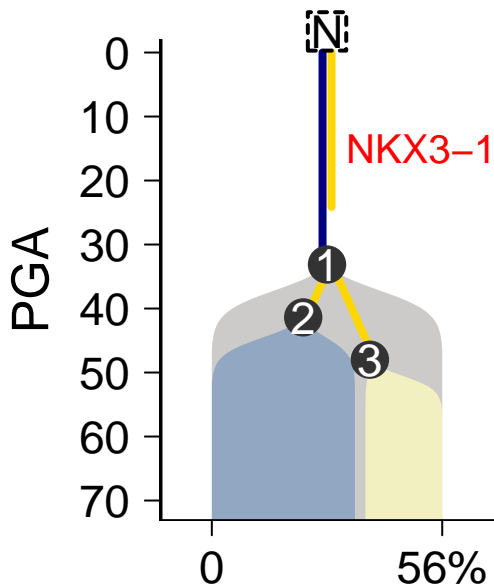

## MuTect-TITAN

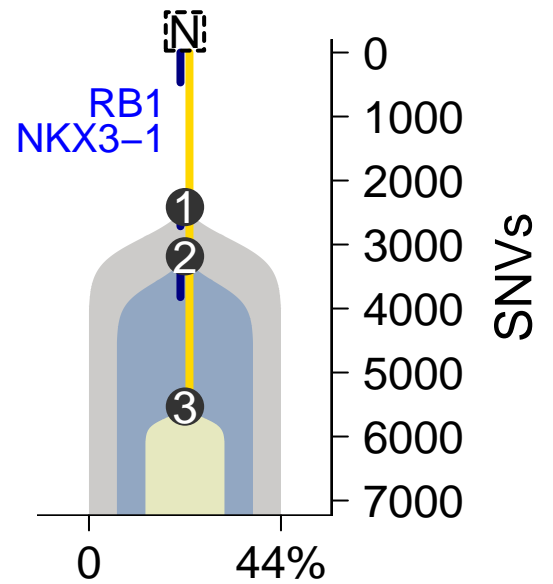

# CPCG0557

## SomaticSniper-Battenberg

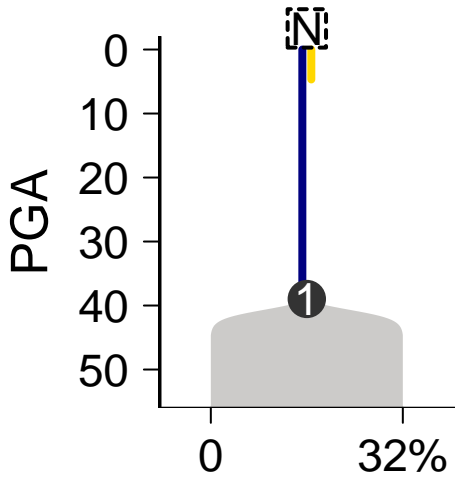

## SomaticSniper-TITAN

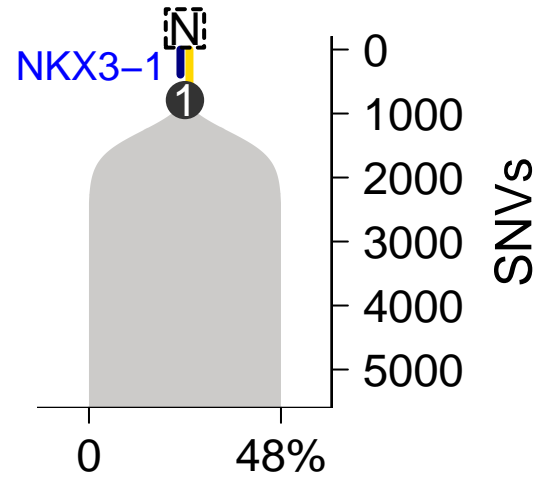

## MuTect-Battenberg

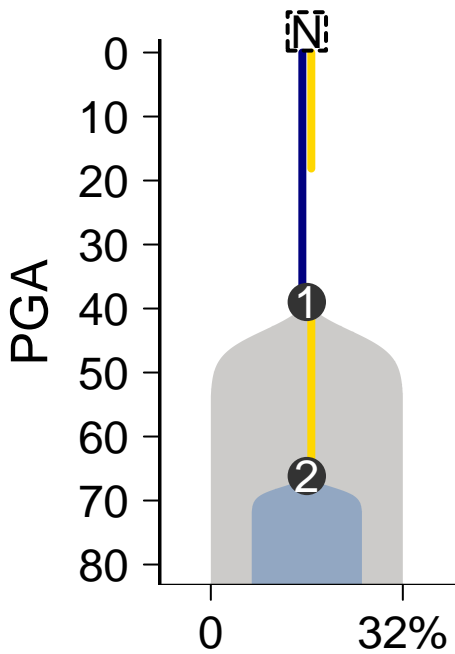

## MuTect-TITAN

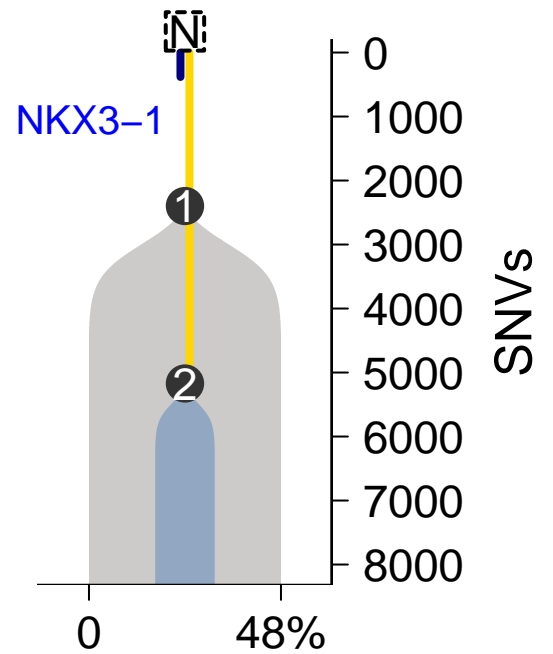

# CPCG0559

## SomaticSniper-Battenberg

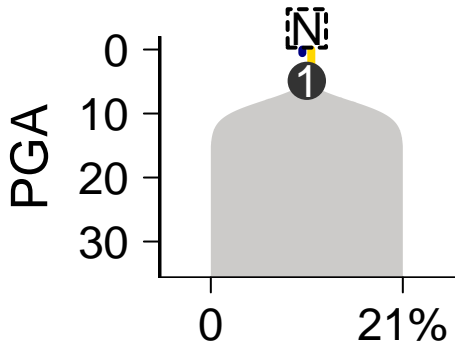

## SomaticSniper-TITAN

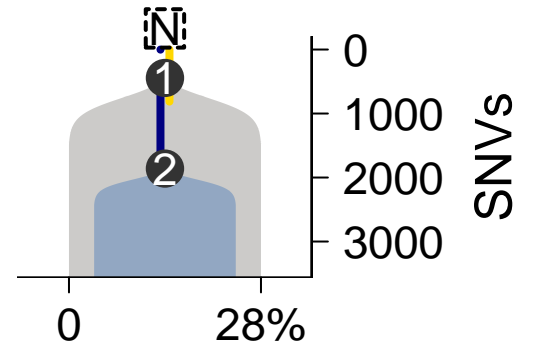

## MuTect-Battenberg

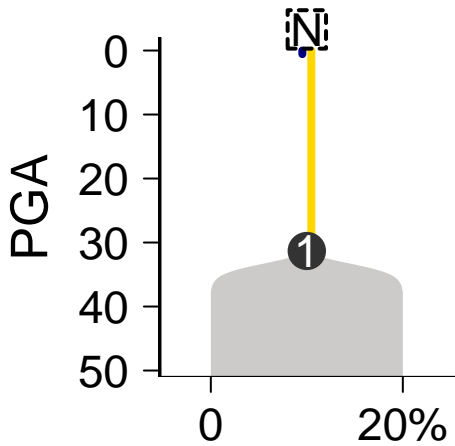

## MuTect-TITAN

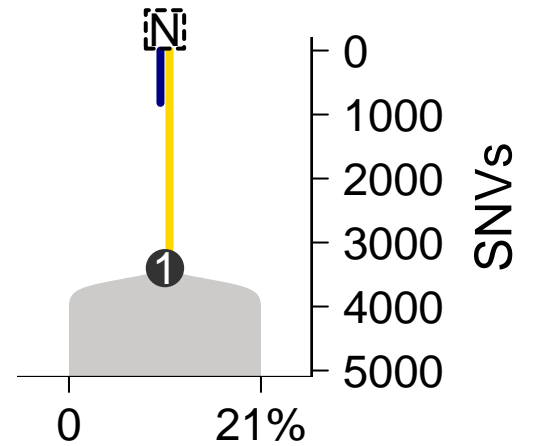

# CPCG0560

## SomaticSniper-Battenberg

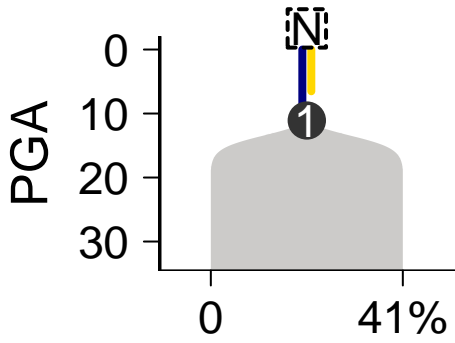

## SomaticSniper-TITAN

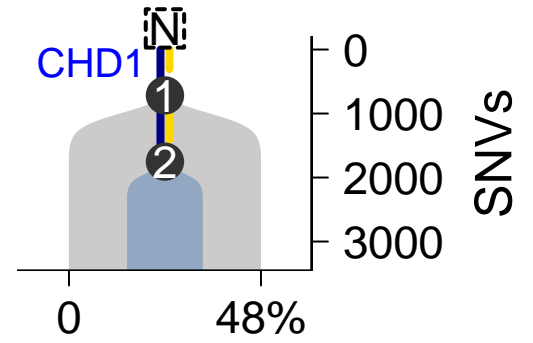

## MuTect-Battenberg

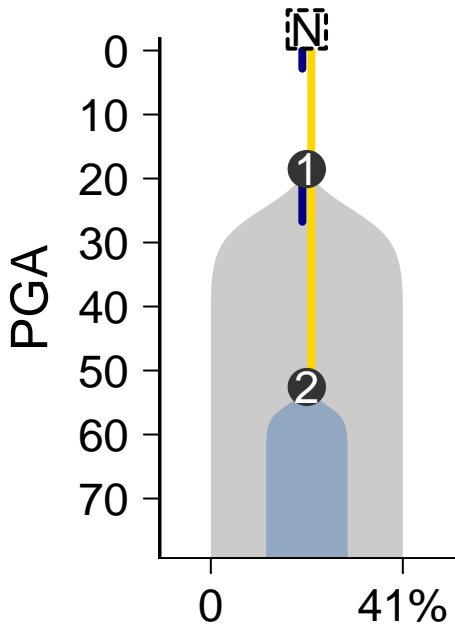

## MuTect-TITAN

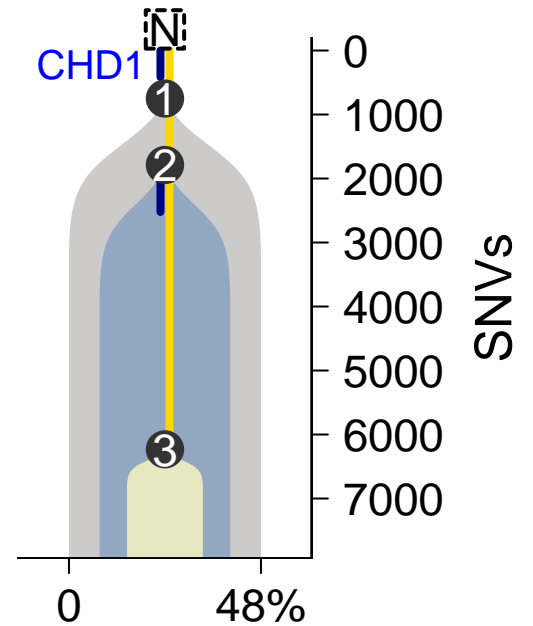

# CPCG0561

## SomaticSniper-Battenberg

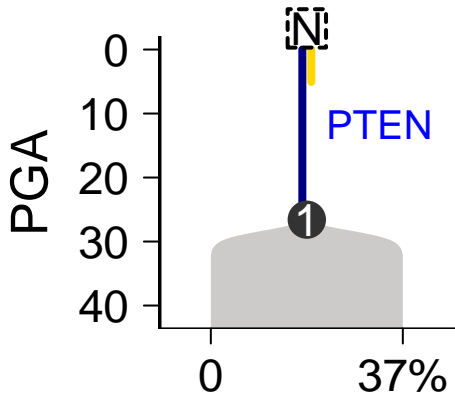

## SomaticSniper-TITAN

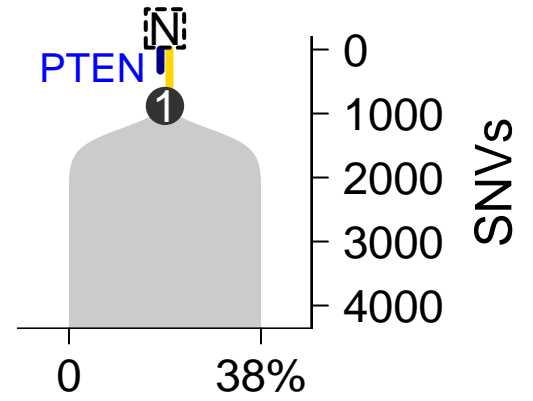

## MuTect-Battenberg

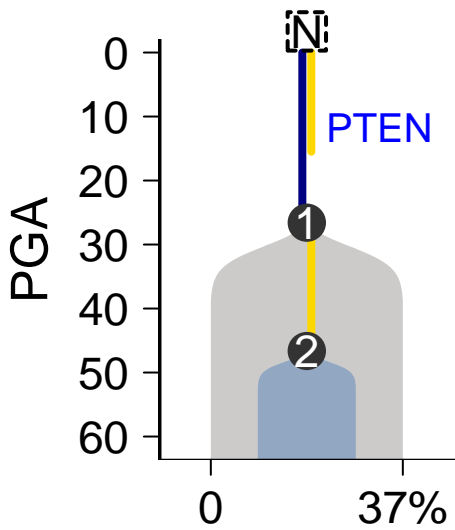

## MuTect-TITAN

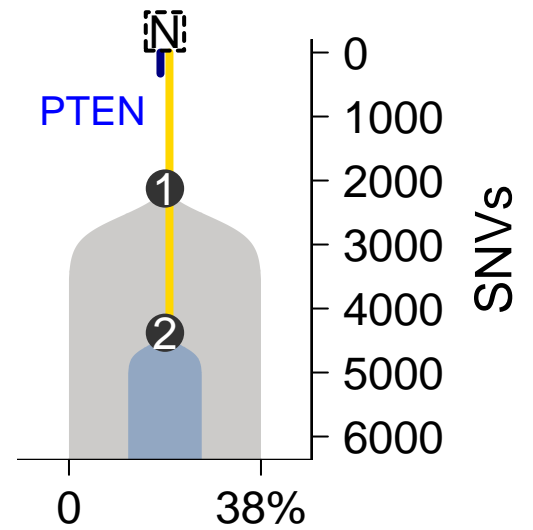

# CPCG0562

## SomaticSniper-Battenberg

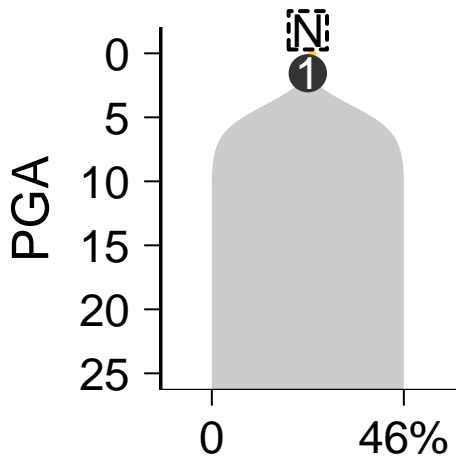

## SomaticSniper-TITAN

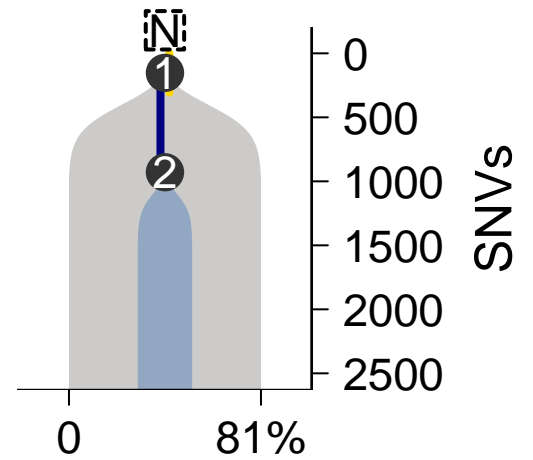

## MuTect-Battenberg

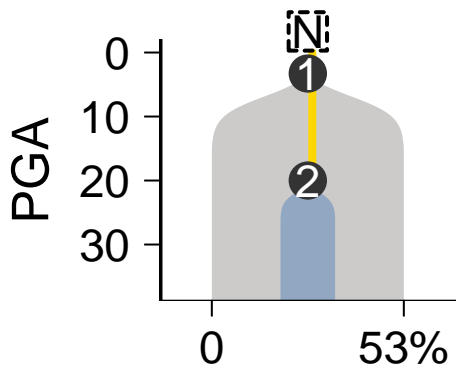

## MuTect-TITAN

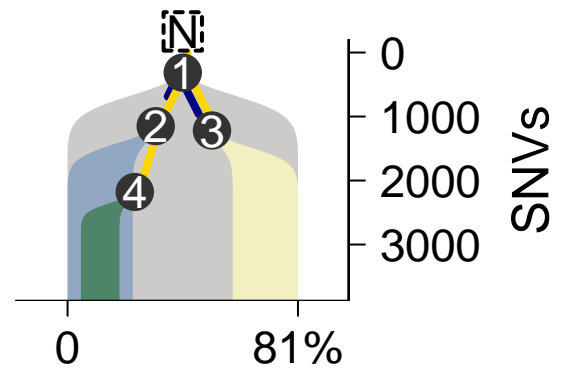

# CPCG0565

## SomaticSniper-Battenberg

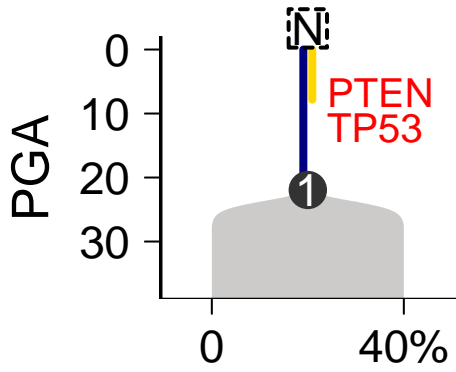

## SomaticSniper-TITAN

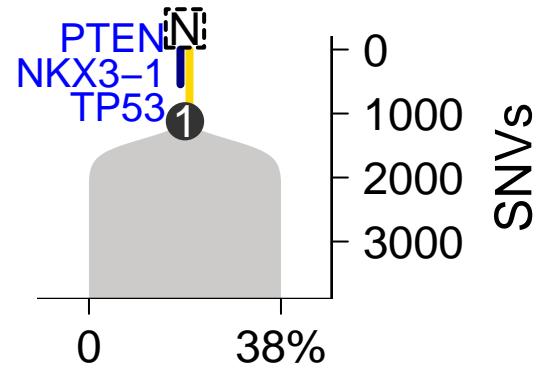

## MuTect-TITAN

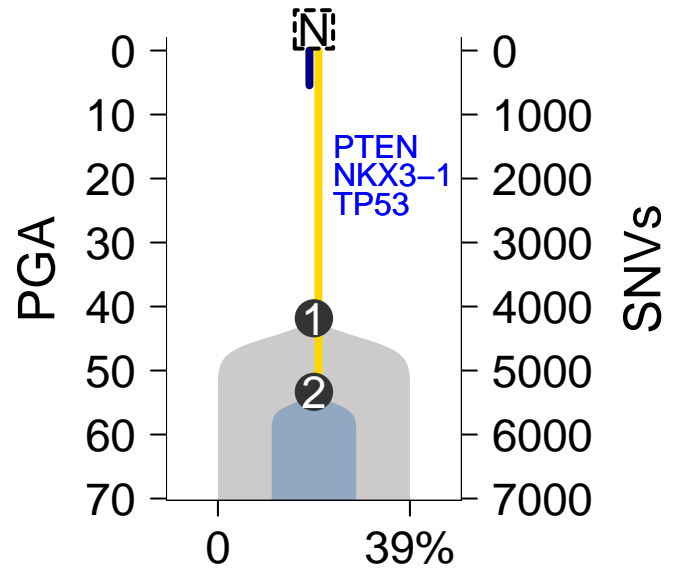



# CPCG0566

## SomaticSniper-Battenberg

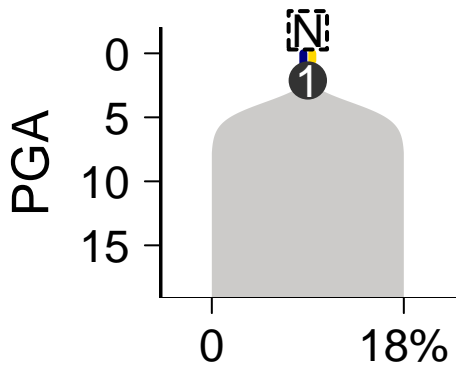

## SomaticSniper-TITAN

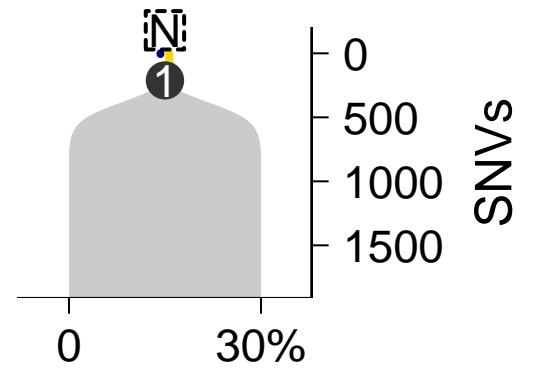

## MuTect-Battenberg

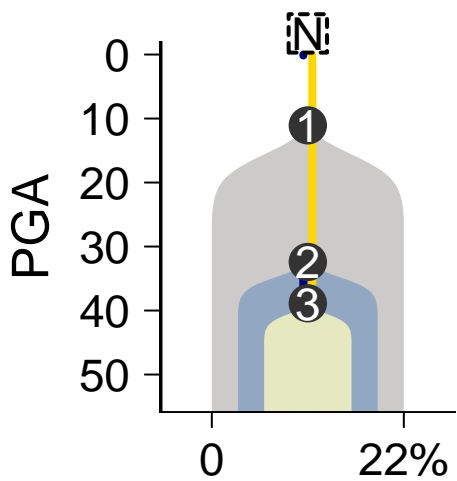

## MuTect-TITAN

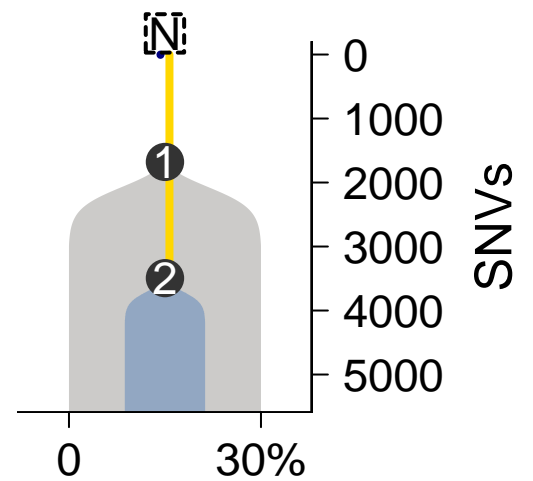

# CPCG0567

## SomaticSniper-TITAN

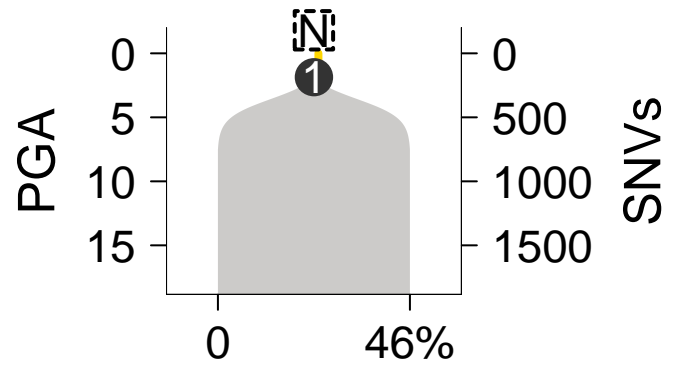

## MuTect-Battenberg

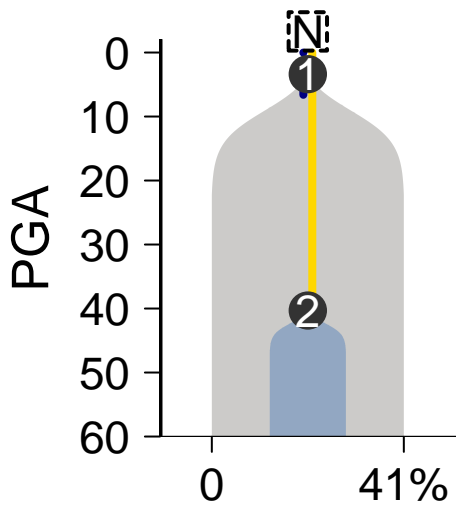

## MuTect-TITAN

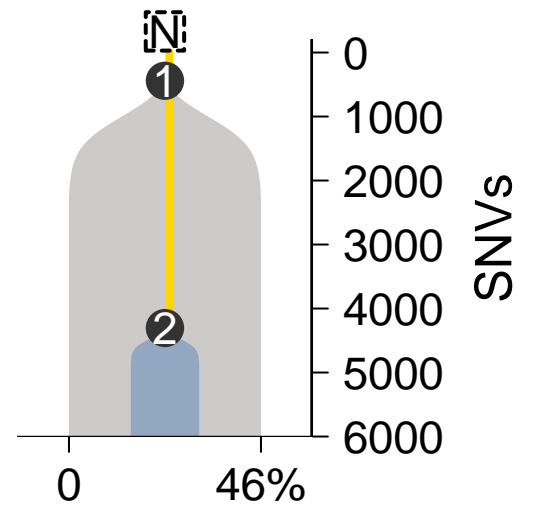

# CPCG0570

## SomaticSniper–Battenberg

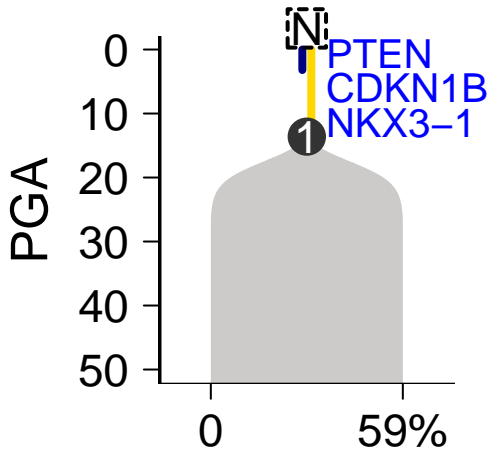

## SomaticSniper–TITAN

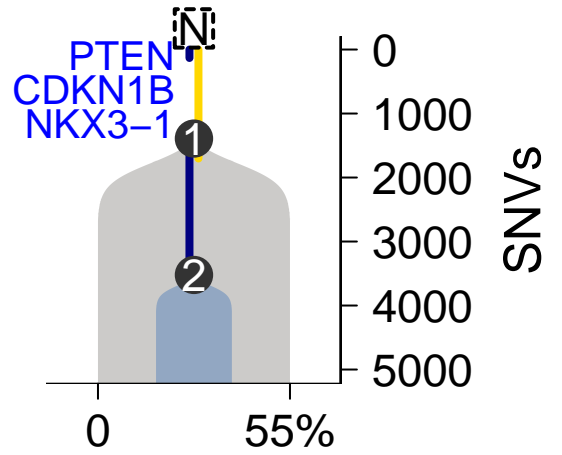

## MuTect–Battenberg

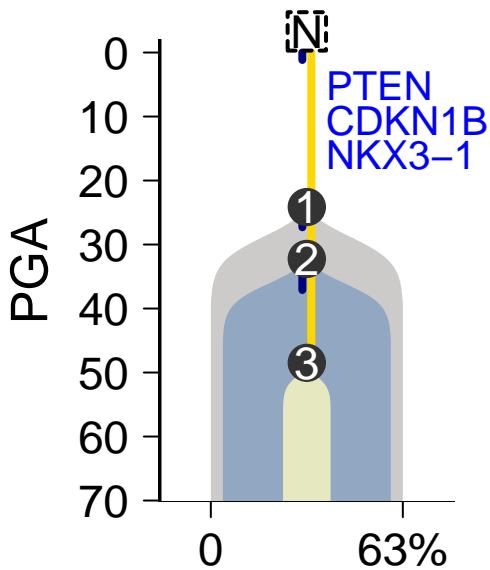

## MuTect–TITAN

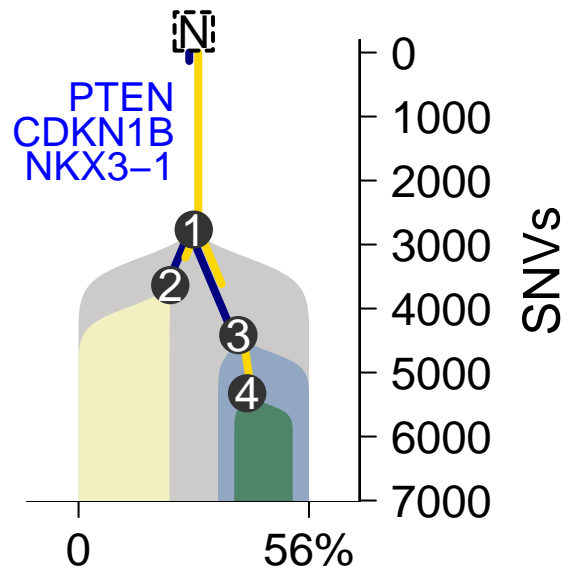

# CPCG0571

## SomaticSniper-Battenberg

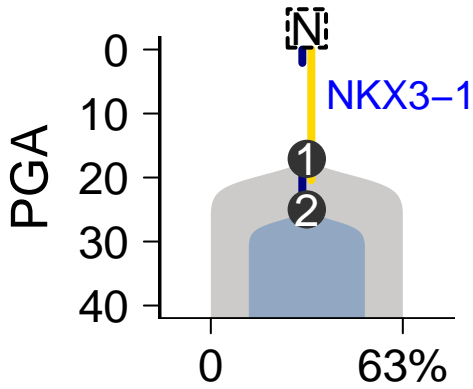

## SomaticSniper-TITAN

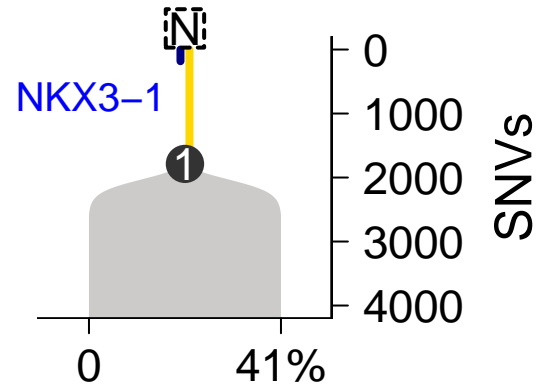

## MuTect-Battenberg

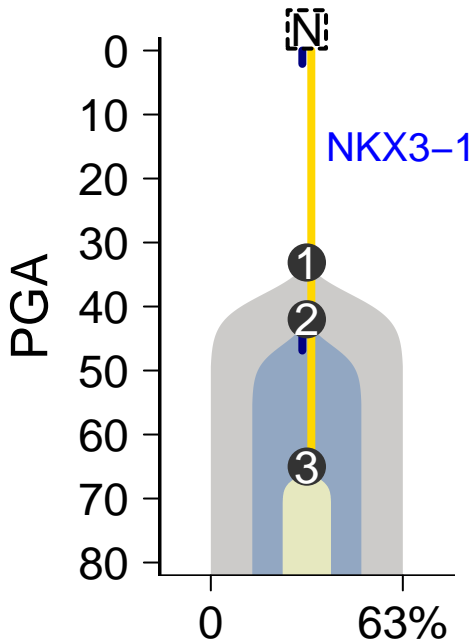

## MuTect-TITAN

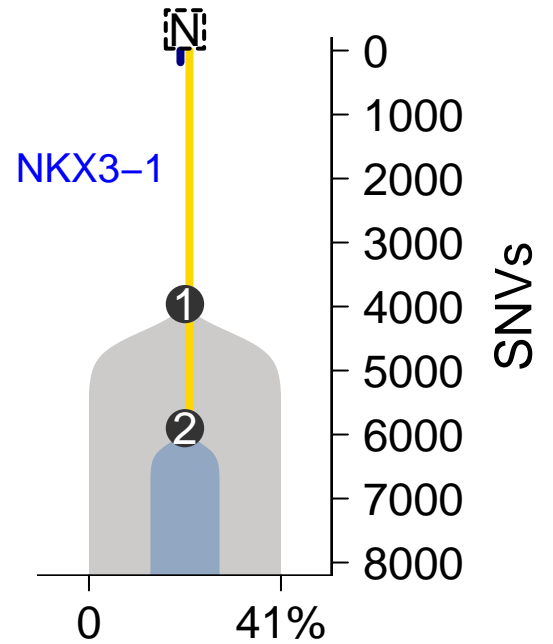

# CPCG0573

## SomaticSniper-Battenberg

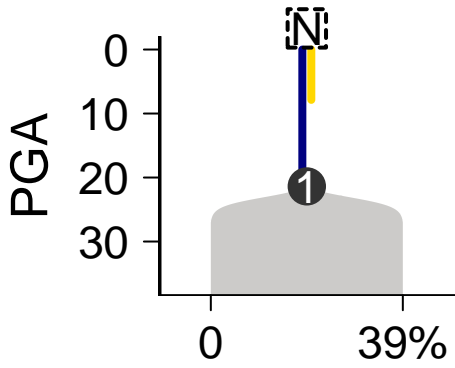

## SomaticSniper-TITAN

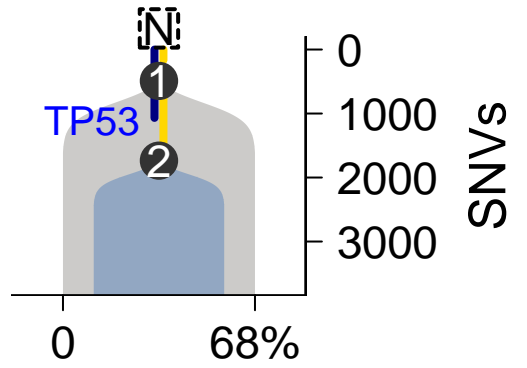

## MuTect-Battenberg

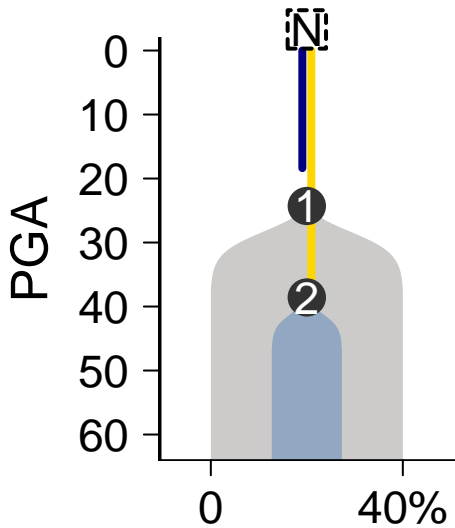

## MuTect-TITAN

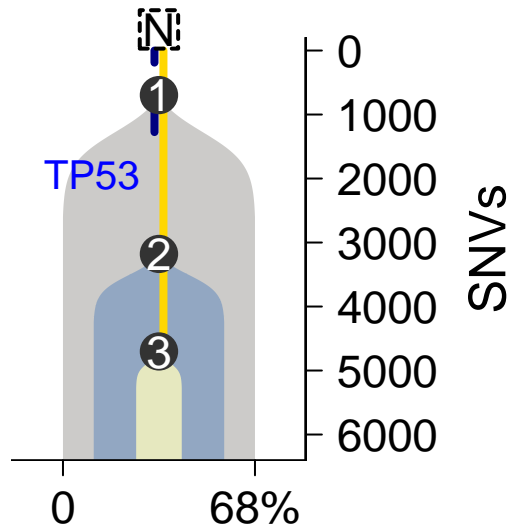

# CPCG0574

## SomaticSniper-Battenberg

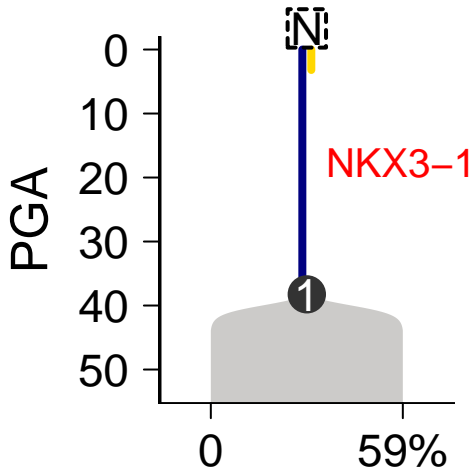

## SomaticSniper-TITAN

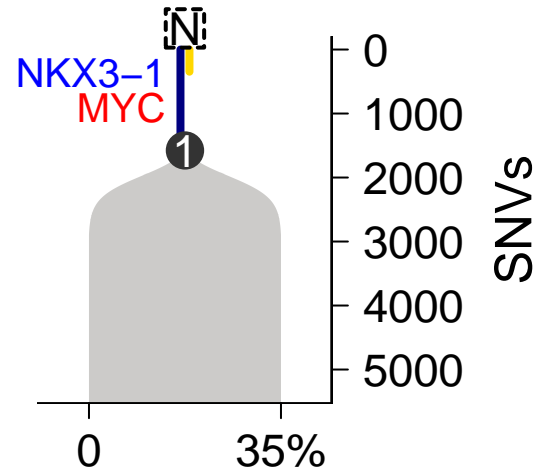

## MuTect-Battenberg

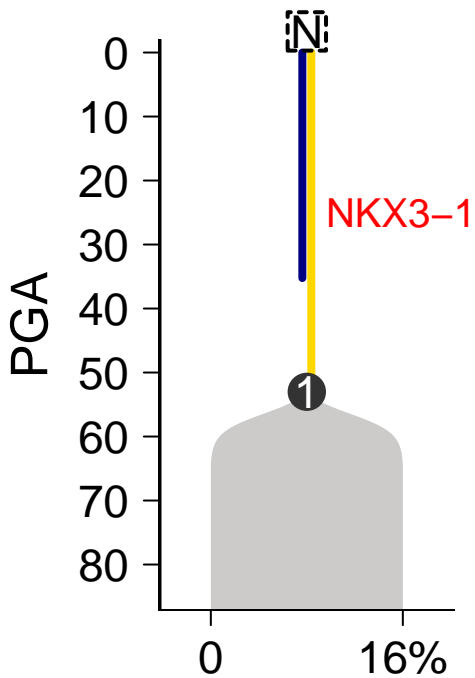

## MuTect-TITAN

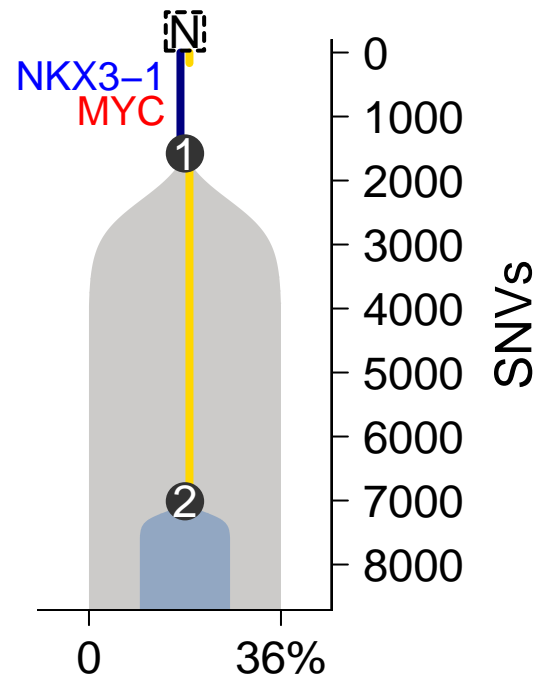

# CPCG0575

## SomaticSniper-Battenberg

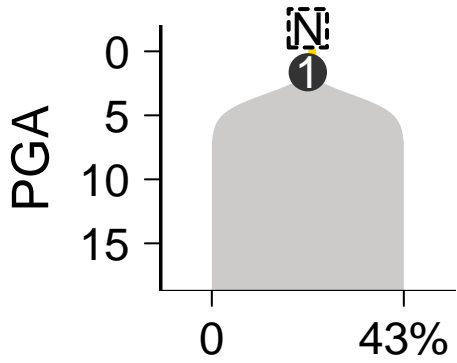

## SomaticSniper-TITAN

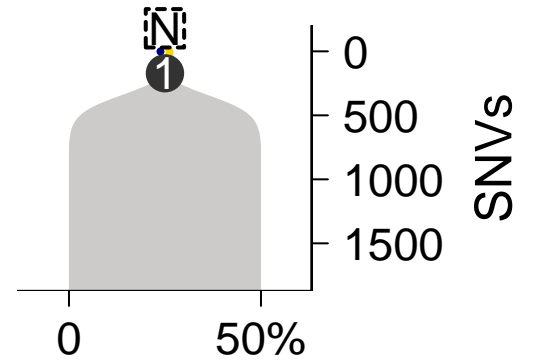

## MuTect-Battenberg

Poly-tumour

## MuTect-TITAN

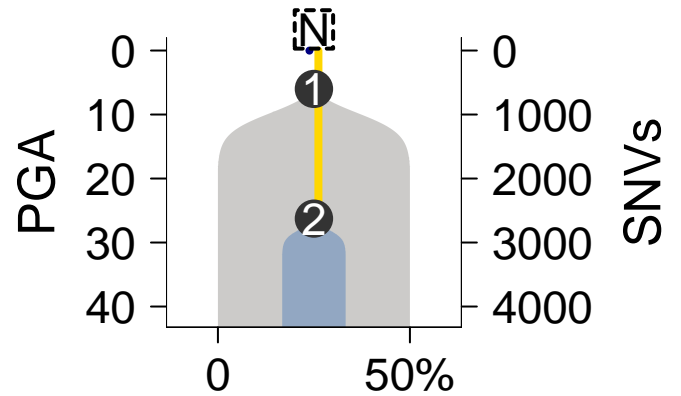

# CPCG0576

## SomaticSniper-Battenberg

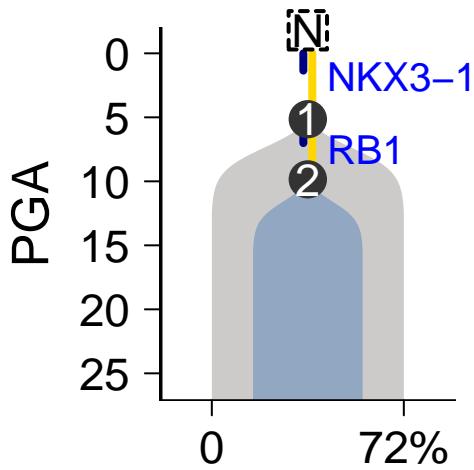

## SomaticSniper-TITAN

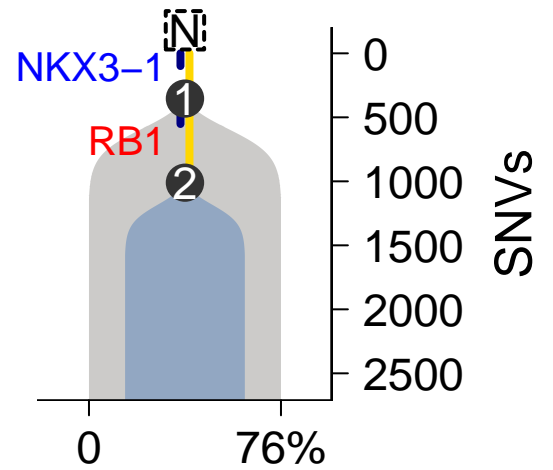

## MuTect-Battenberg

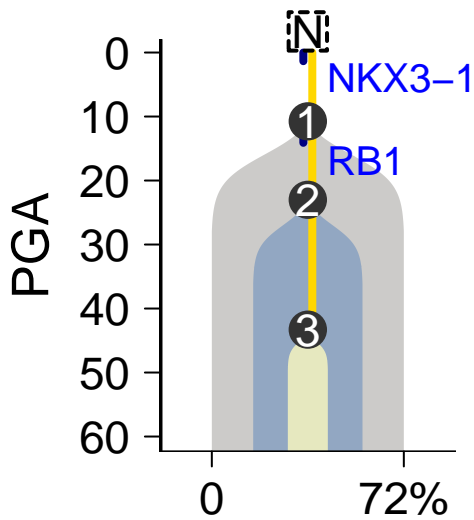

## MuTect-TITAN

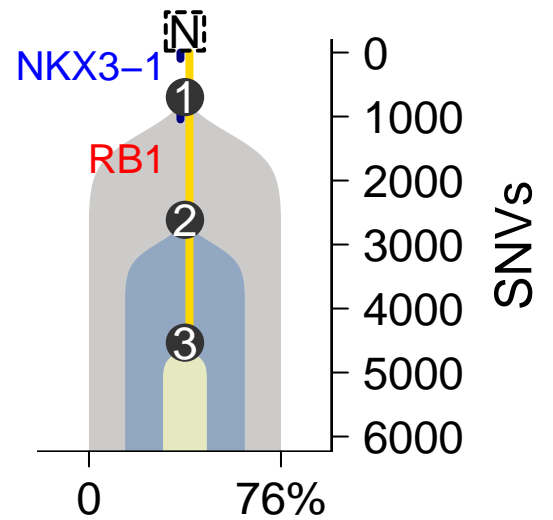



# CPCG0577

## SomaticSniper-Battenberg

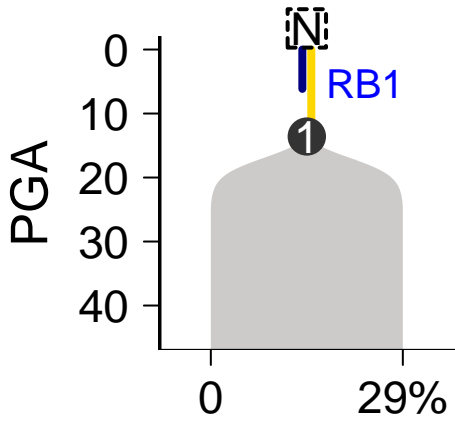

## SomaticSniper-TITAN

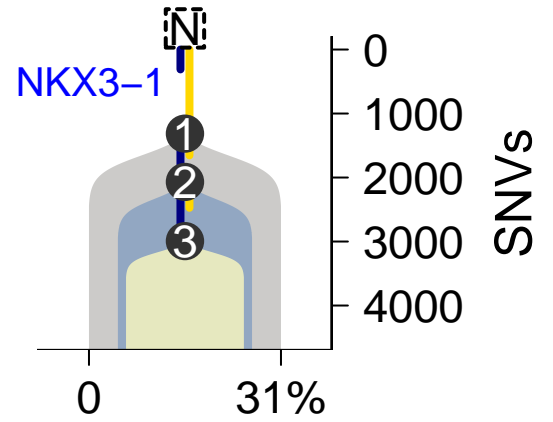

## MuTect-Battenberg

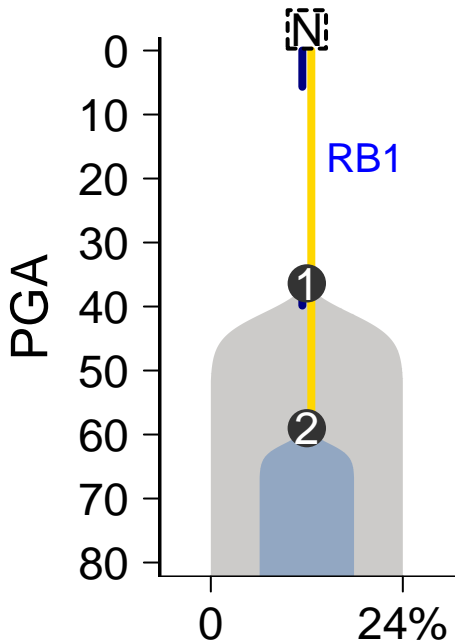

## MuTect-TITAN

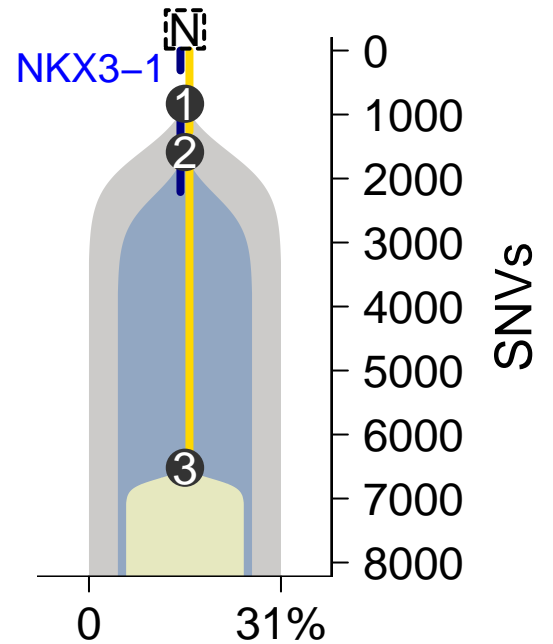

# CPCG0578

## SomaticSniper–Battenberg

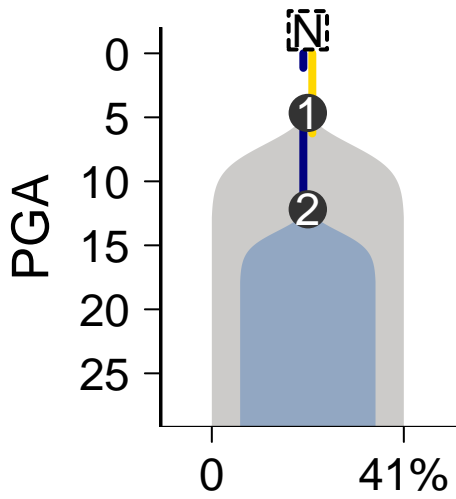

## SomaticSniper–TITAN

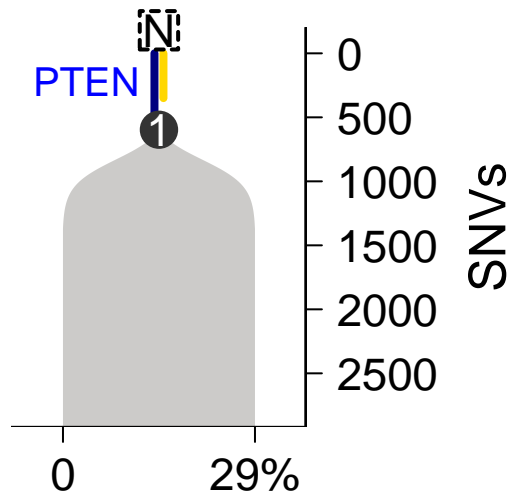

## MuTect–Battenberg

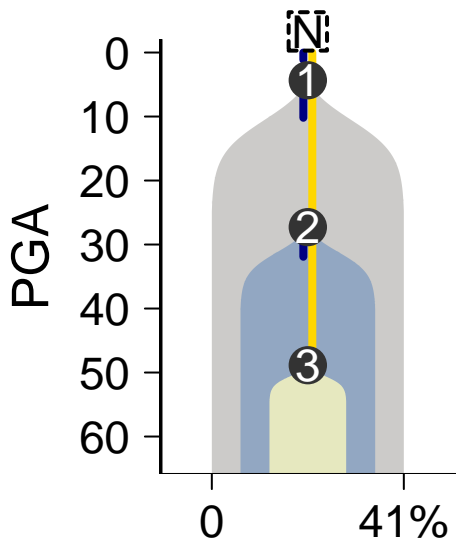

## MuTect–TITAN

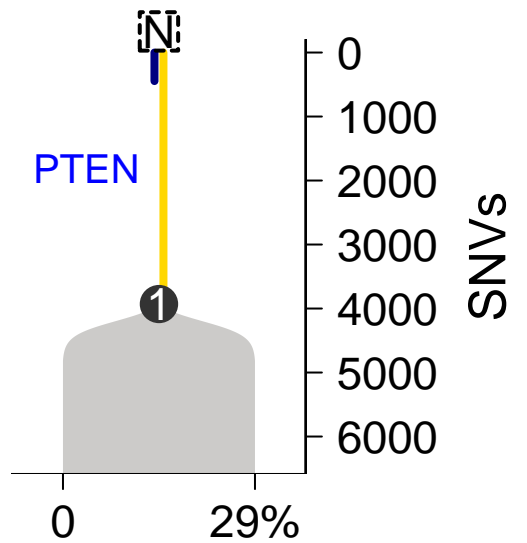

# CPCG0580

## SomaticSniper-Battenberg

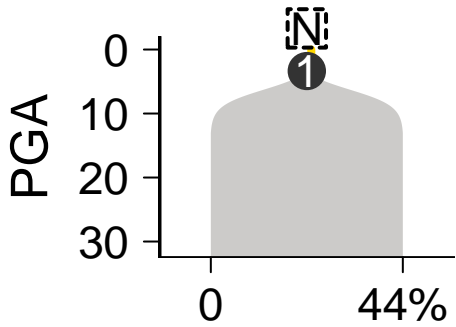

## SomaticSniper-TITAN

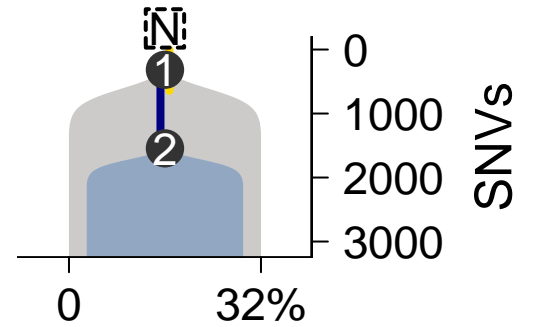

## MuTect-Battenberg

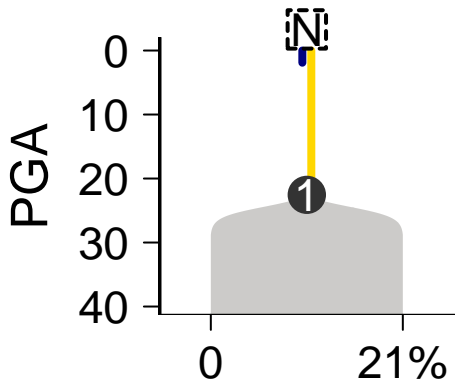

## MuTect-TITAN

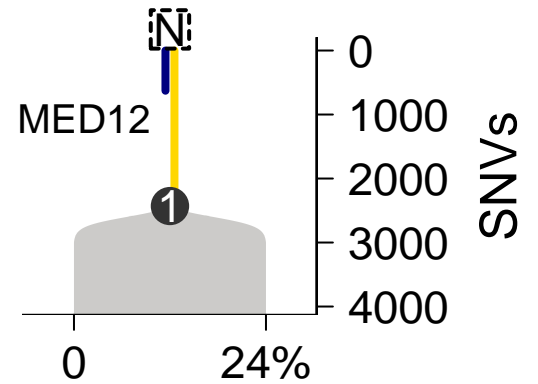

# CPCG0581

## SomaticSniper-Battenberg

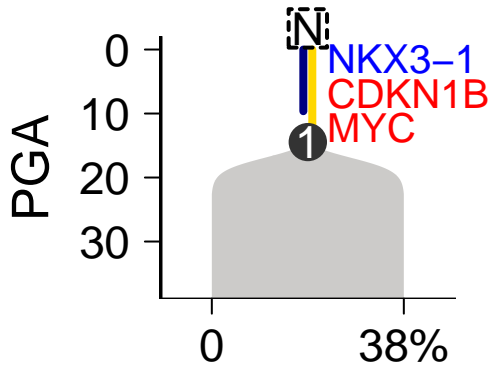

## SomaticSniper-TITAN

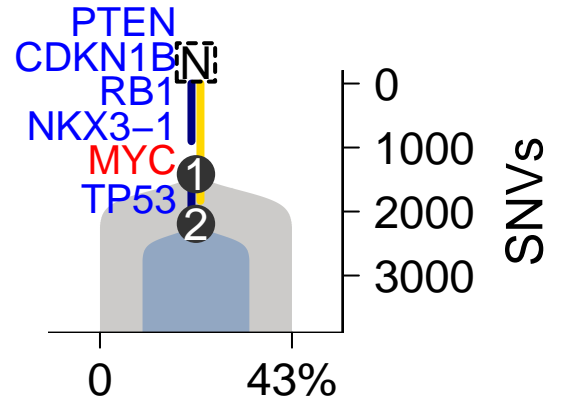

## MuTect-Battenberg

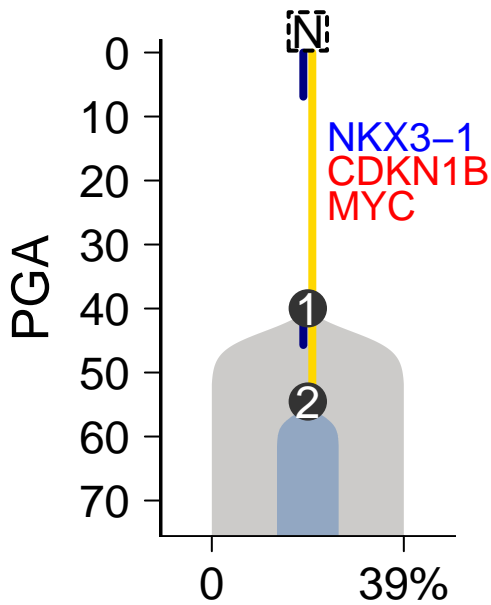

## MuTect-TITAN

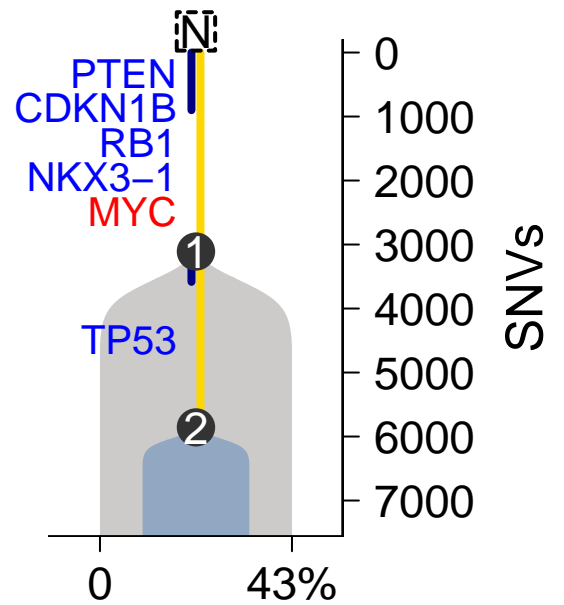

# CPCG0582

## SomaticSniper-Battenberg

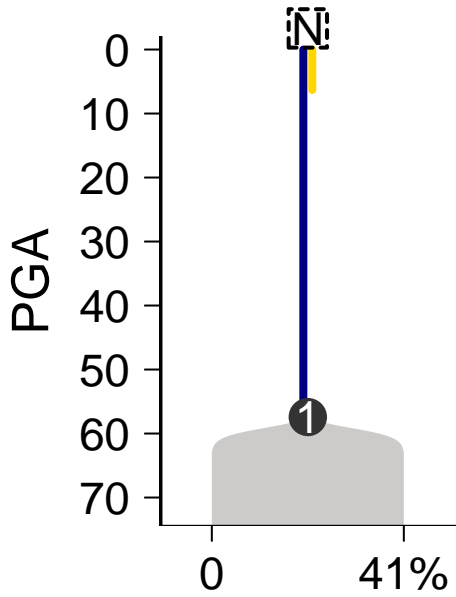

## SomaticSniper-TITAN

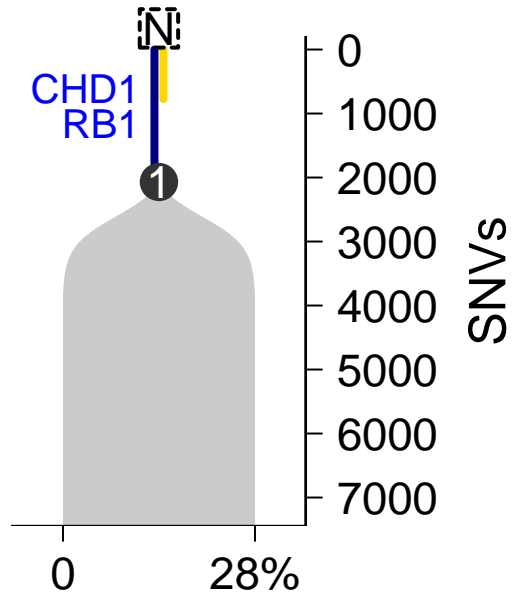

## MuTect-Battenberg

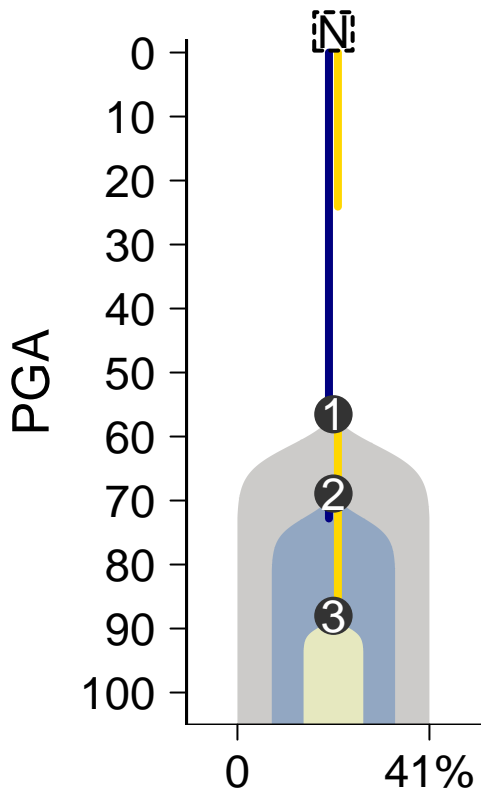

## MuTect-TITAN

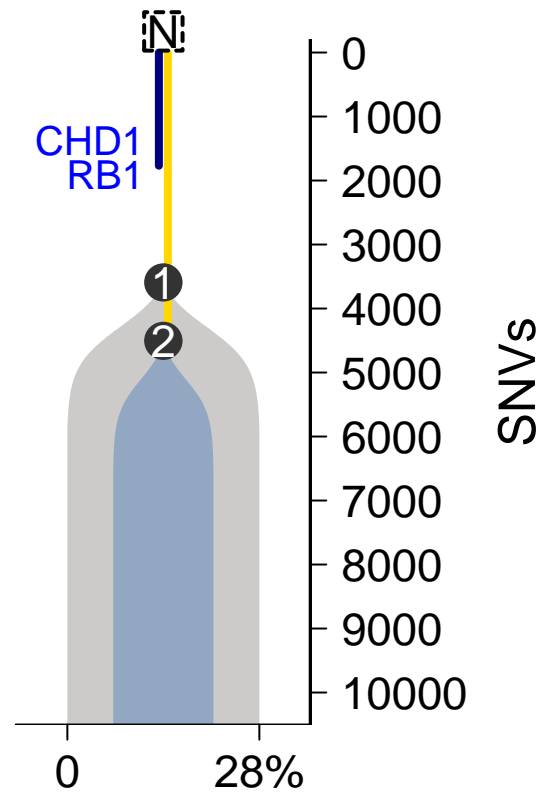

# CPCG0584

## SomaticSniper-Battenberg

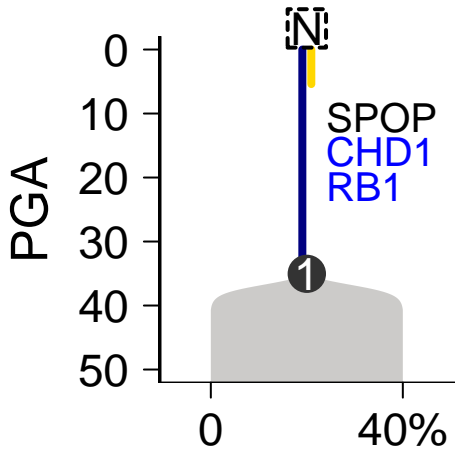

## SomaticSniper-TITAN

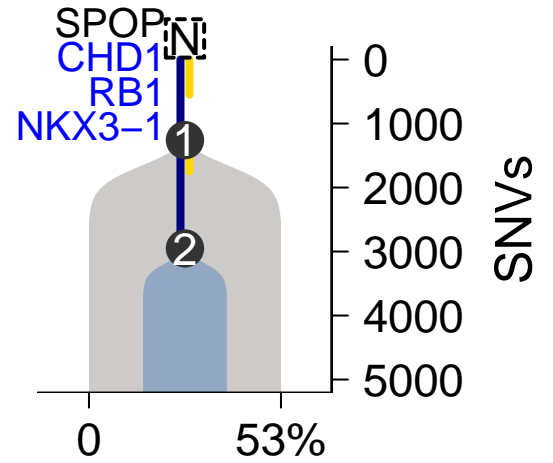

## MuTect-Battenberg

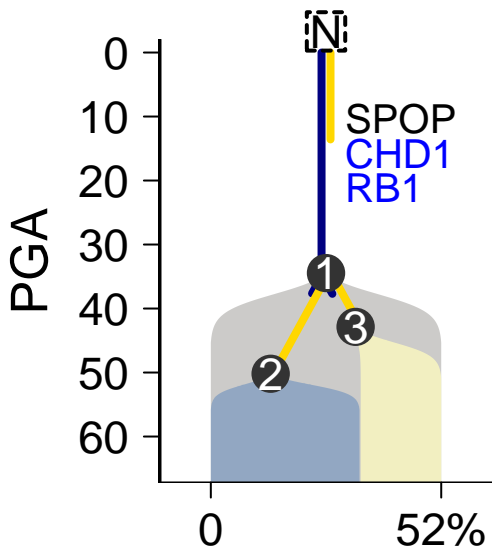

## MuTect-TITAN

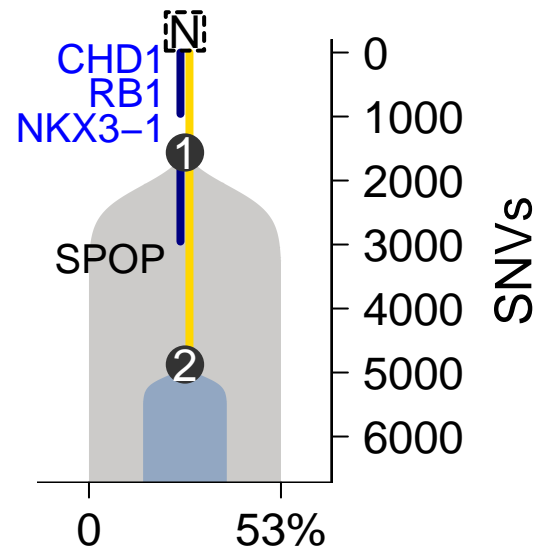

# CPCG0587

## SomaticSniper-Battenberg

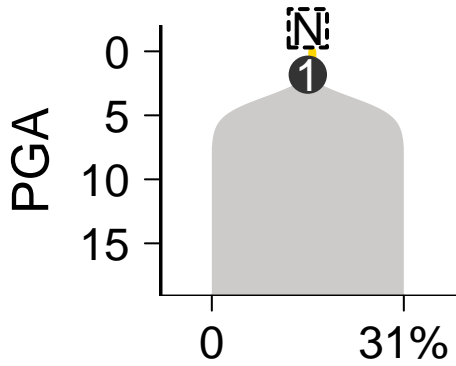

## SomaticSniper-TITAN

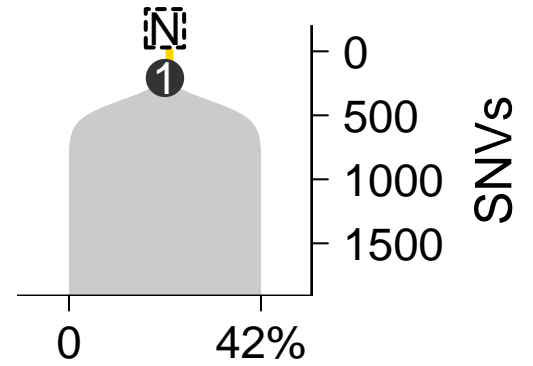

## MuTect-TITAN

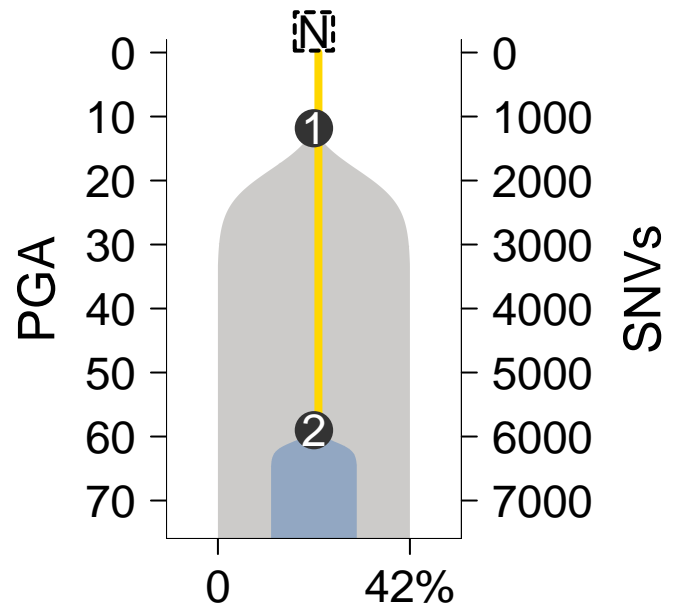

# CPCG0588

## SomaticSniper–Battenberg

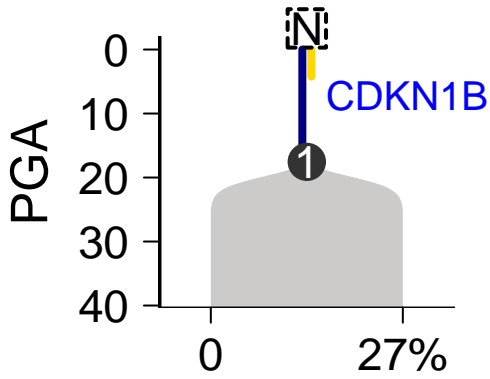

## SomaticSniper–TITAN

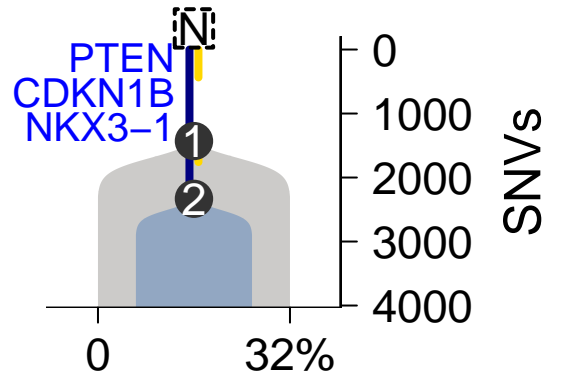

## MuTect–Battenberg

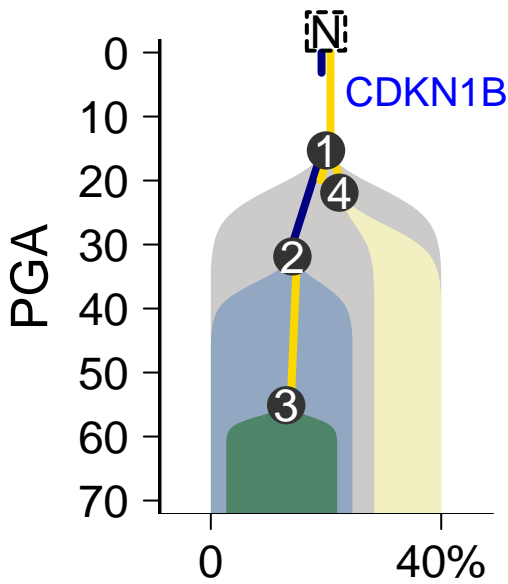

## MuTect–TITAN

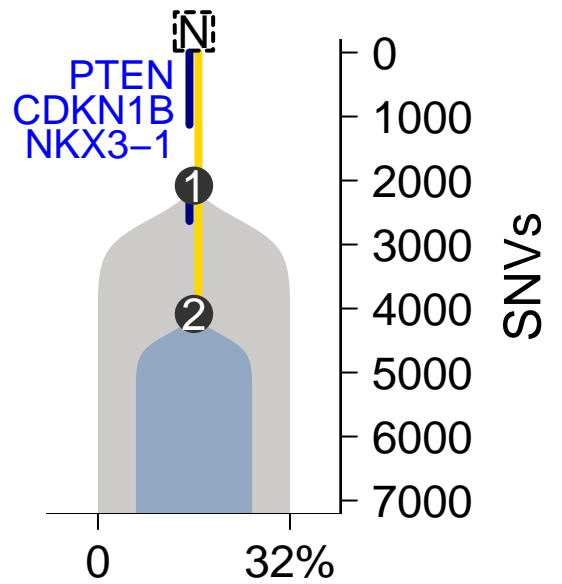



# CPCG0589

## SomaticSniper–Battenberg

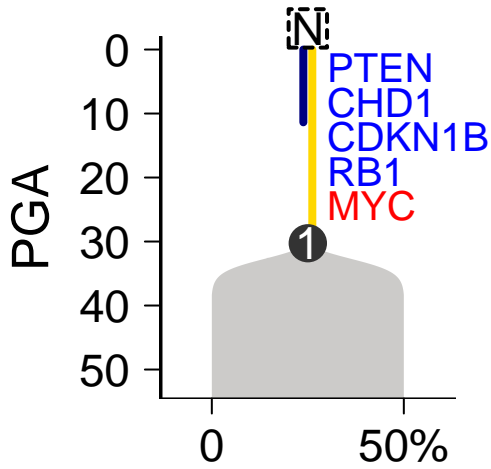

## SomaticSniper–TITAN

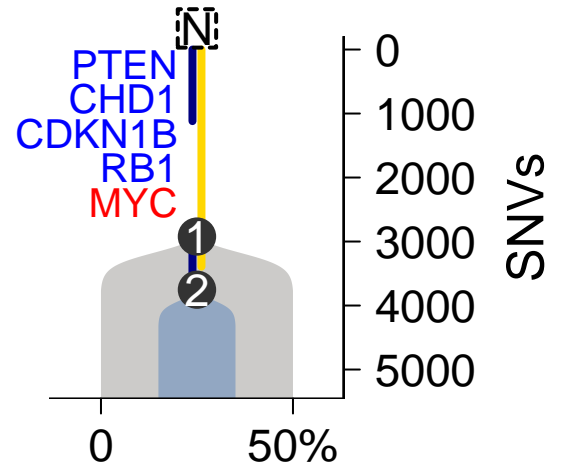

## MuTect–Battenberg

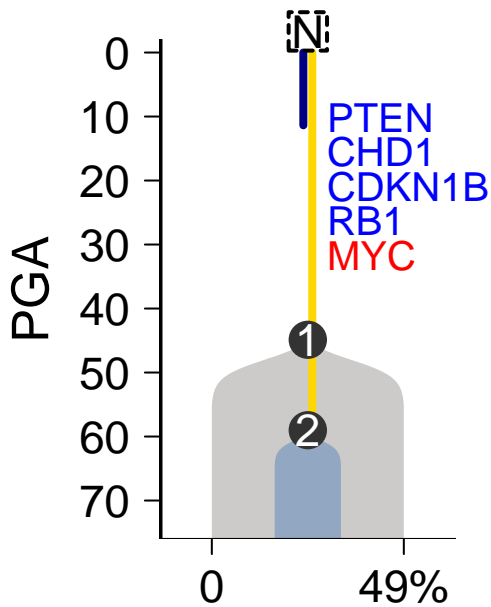

## MuTect–TITAN

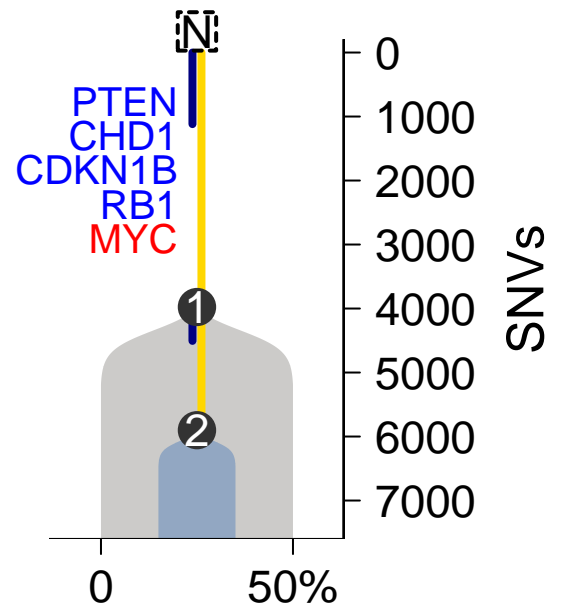

# CPCG0590

## SomaticSniper-Battenberg

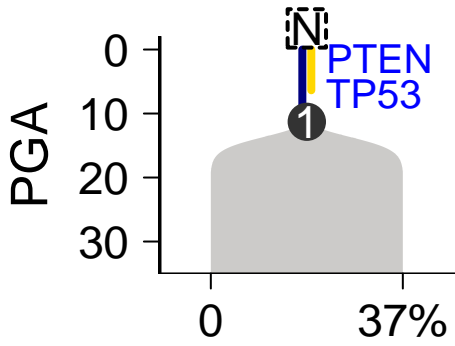

## SomaticSniper-TITAN

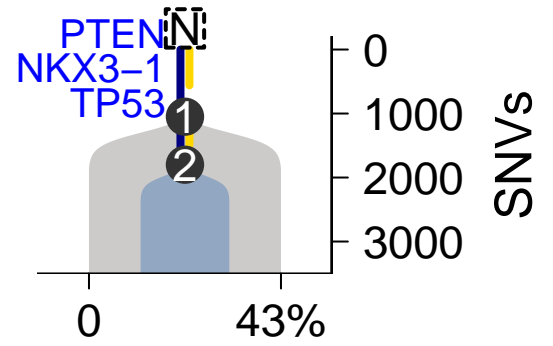

## MuTect-Battenberg

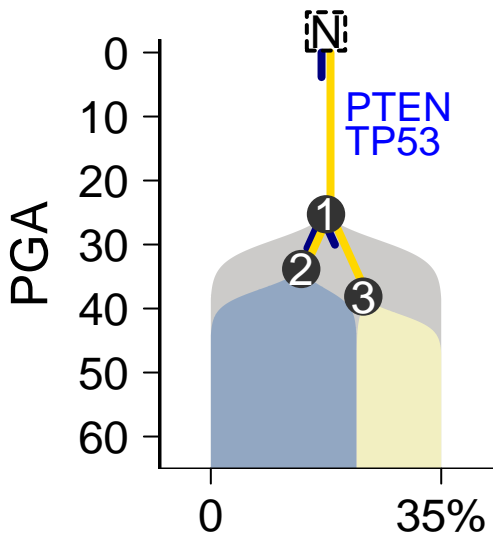

## MuTect-TITAN

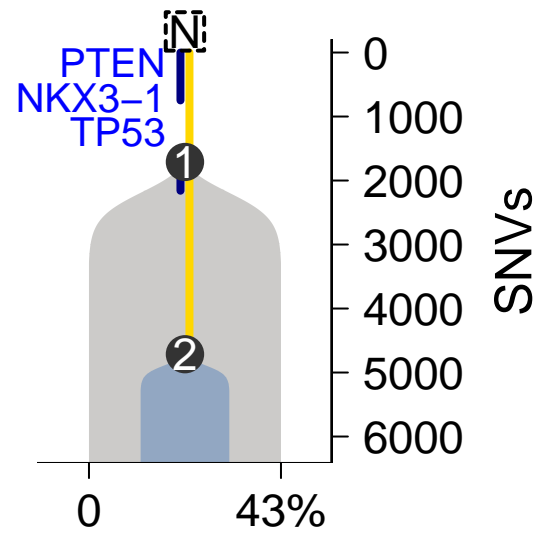

# CPCG0591

## SomaticSniper-Battenberg

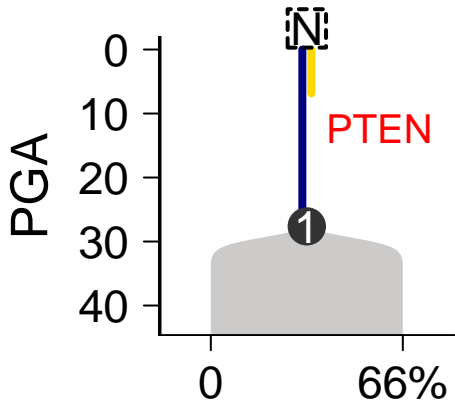

## SomaticSniper-TITAN

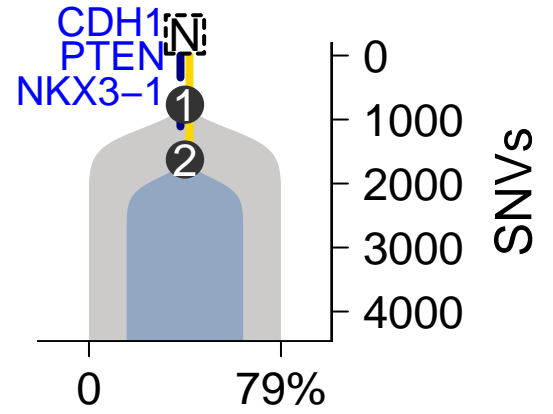

## MuTect-Battenberg

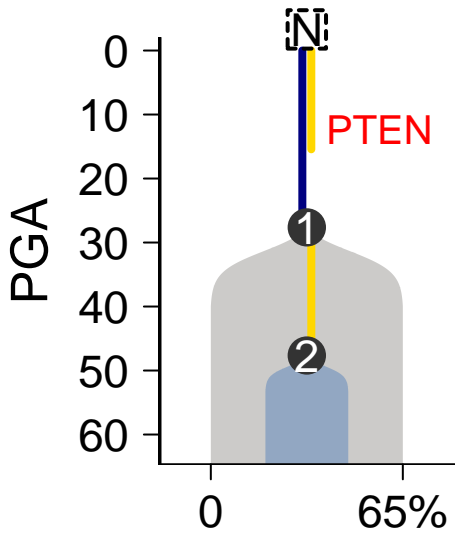

## MuTect-TITAN

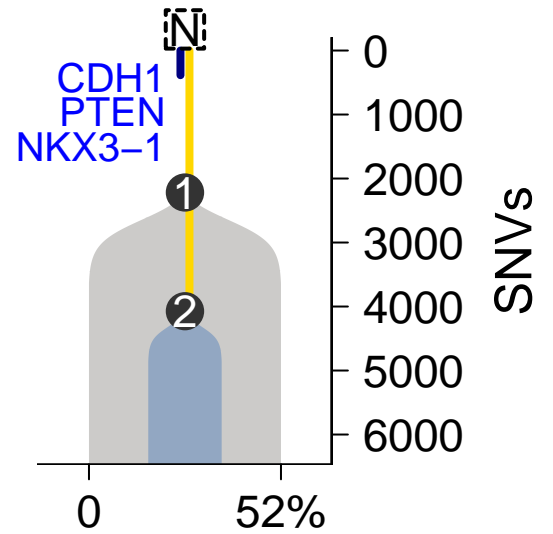

# CPCG0592

## SomaticSniper-Battenberg

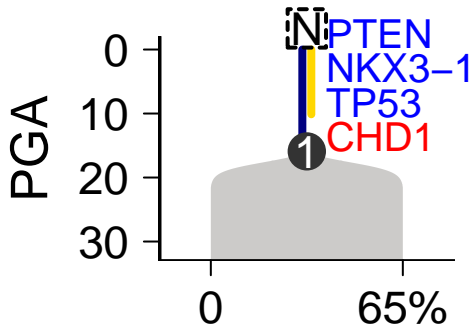

## SomaticSniper-TITAN

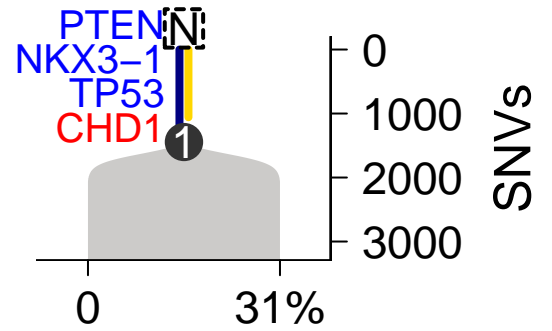

## MuTect-Battenberg

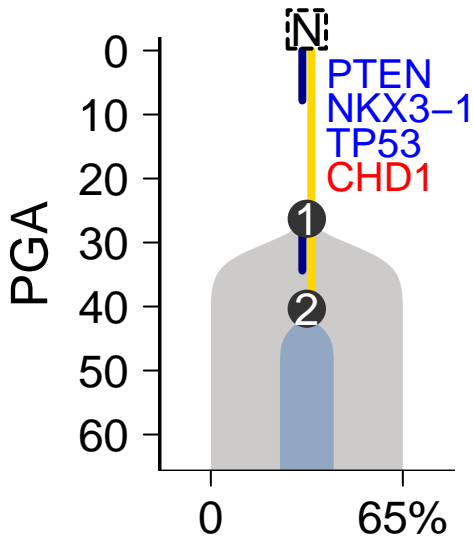

## MuTect-TITAN

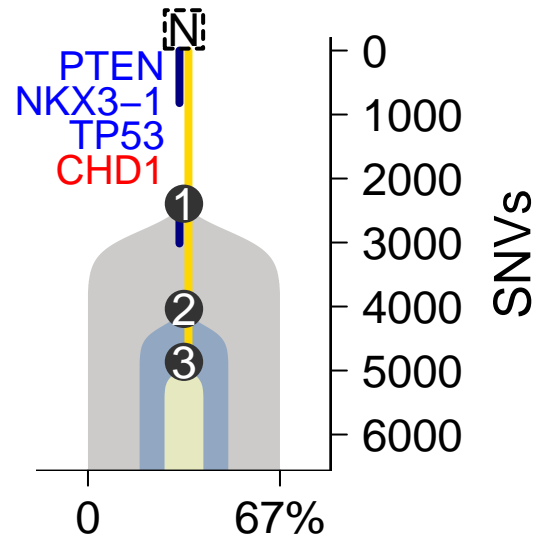

# CPCG0593

## SomaticSniper-Battenberg

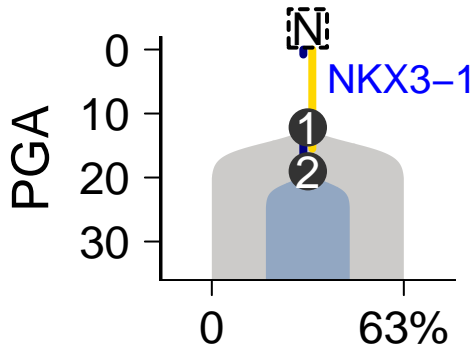

## SomaticSniper-TITAN

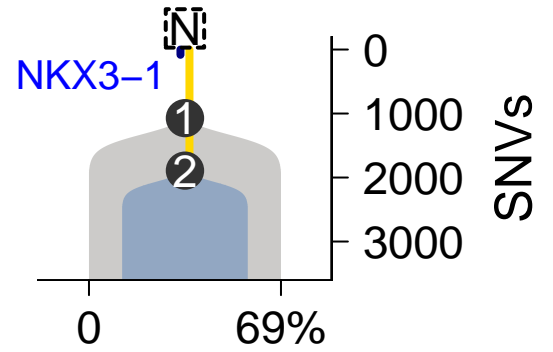

## MuTect-Battenberg

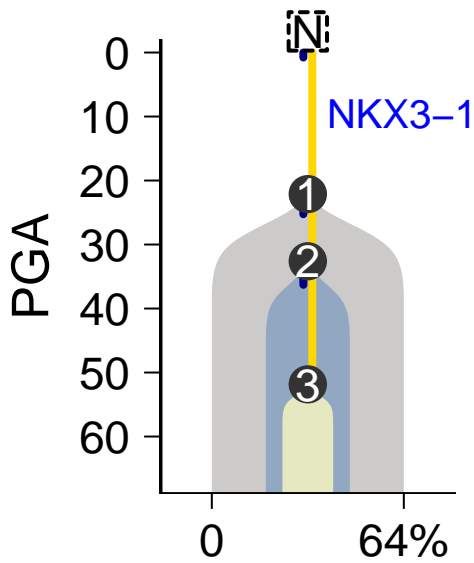

## MuTect-TITAN

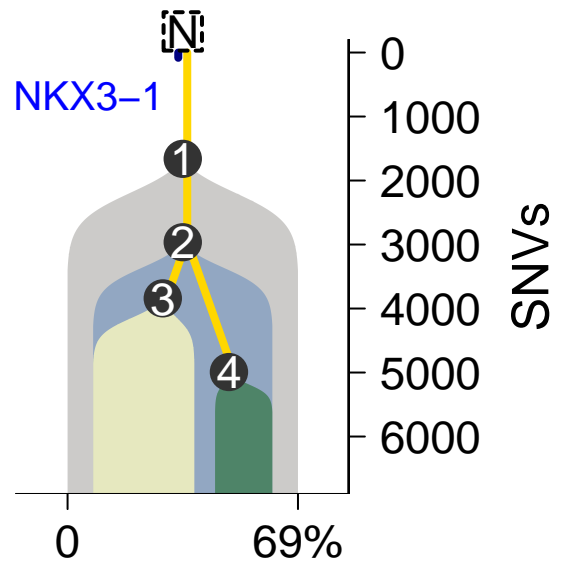

# CPCG0595

## SomaticSniper-Battenberg

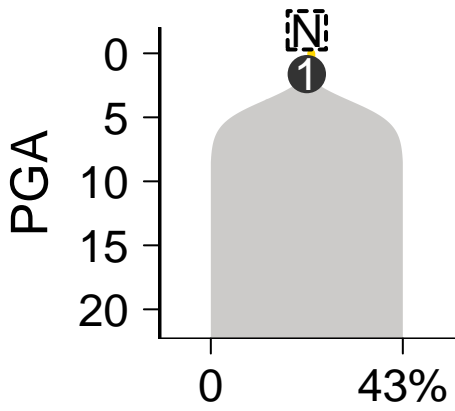

## SomaticSniper-TITAN

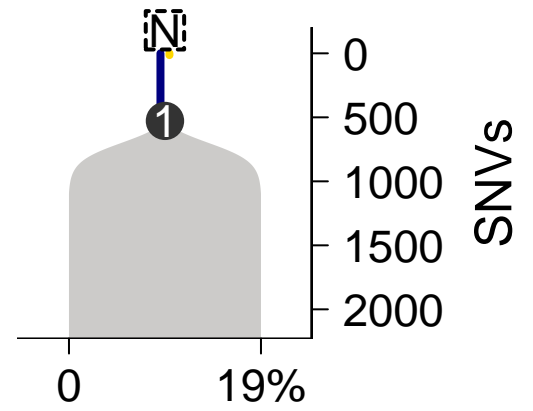

## MuTect-Battenberg

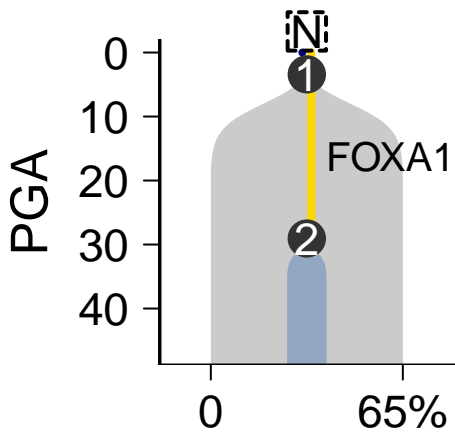

## MuTect-TITAN

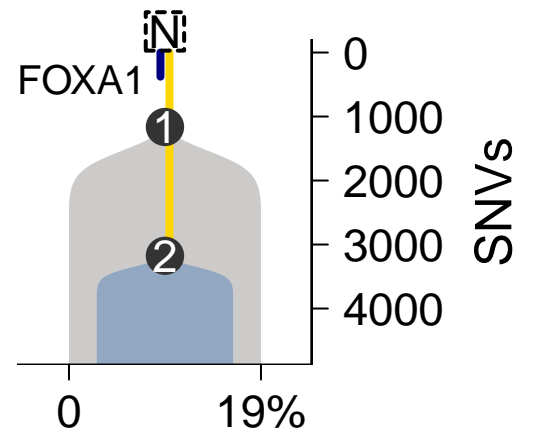

# CPCG0596

## SomaticSniper-Battenberg

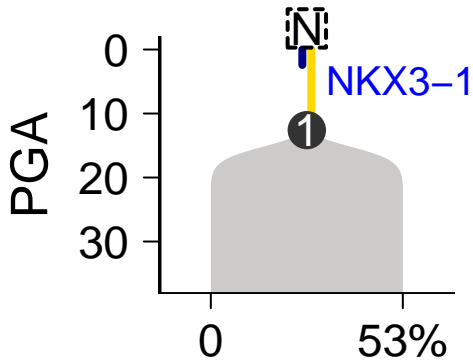

## SomaticSniper-TITAN

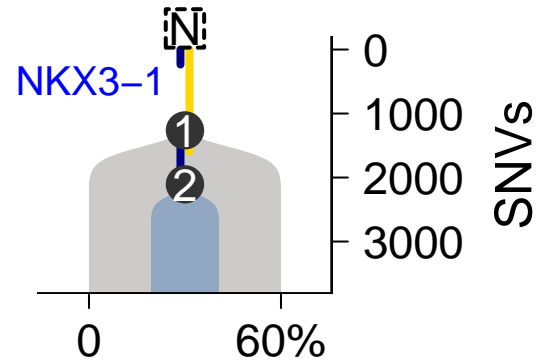

## MuTect-Battenberg

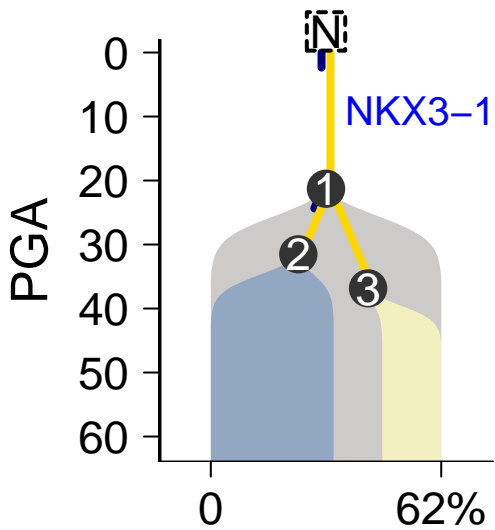

## MuTect-TITAN

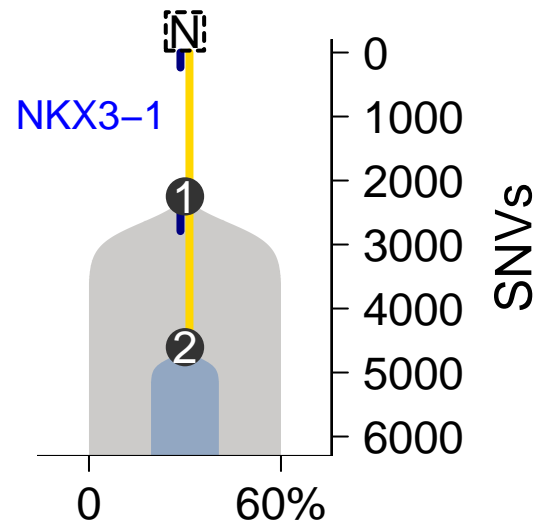

# CPCG0597

## SomaticSniper-Battenberg

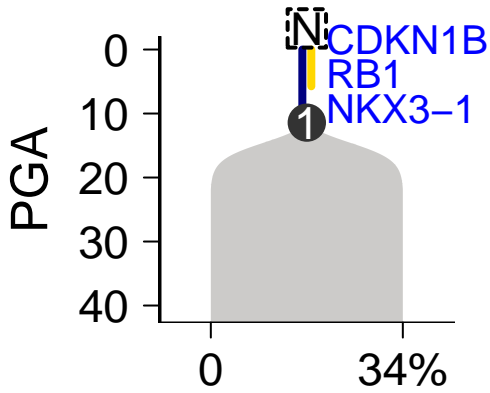

## SomaticSniper-TITAN

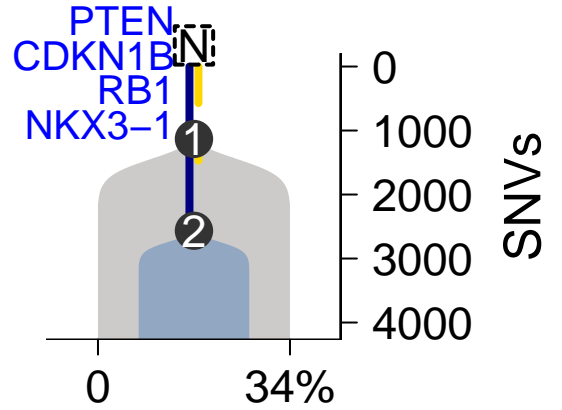

## MuTect-Battenberg

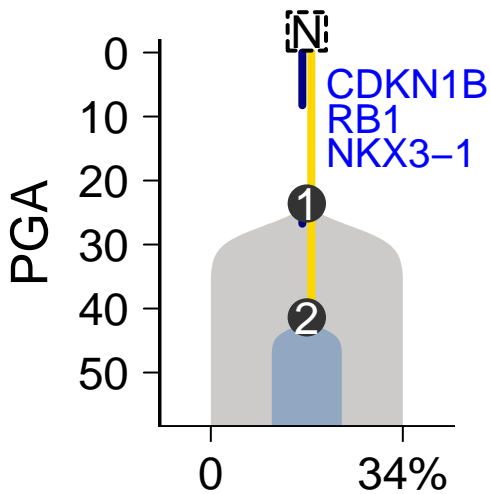

## MuTect-TITAN

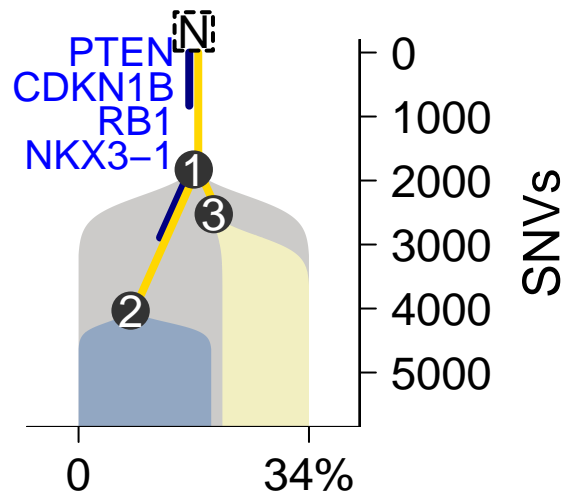



# CPCG0598

## SomaticSniper-Battenberg

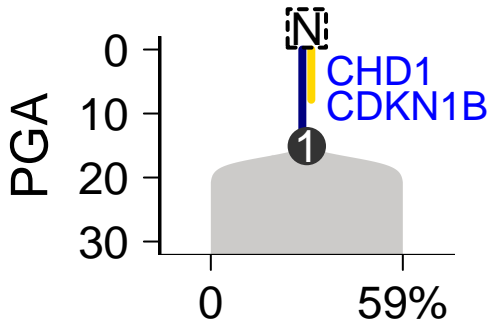

## SomaticSniper-TITAN

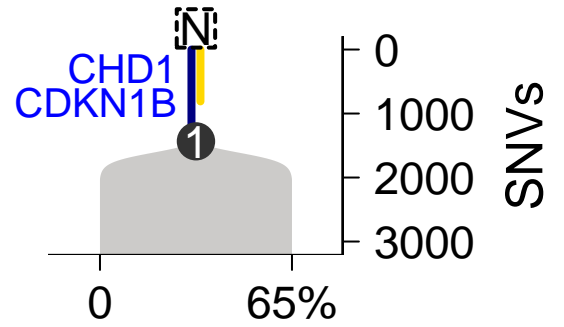

## MuTect-Battenberg

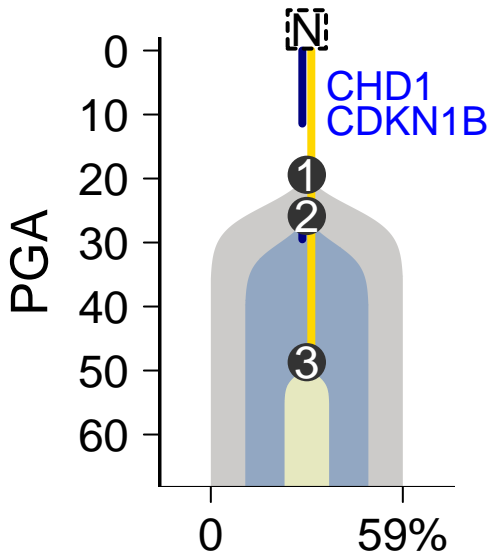

## MuTect-TITAN

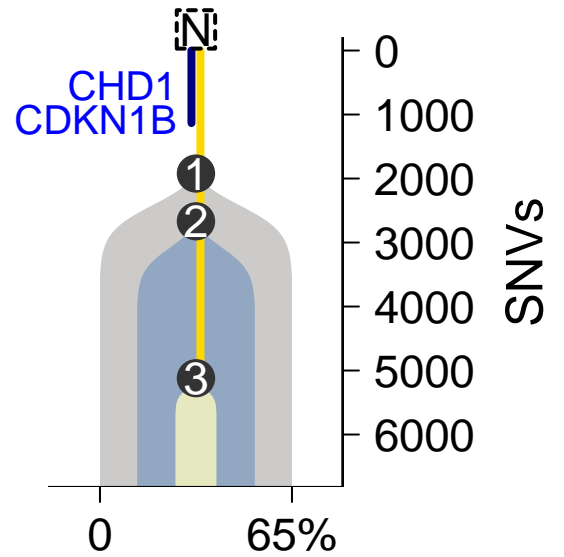

# CPCG0599

## SomaticSniper–Battenberg

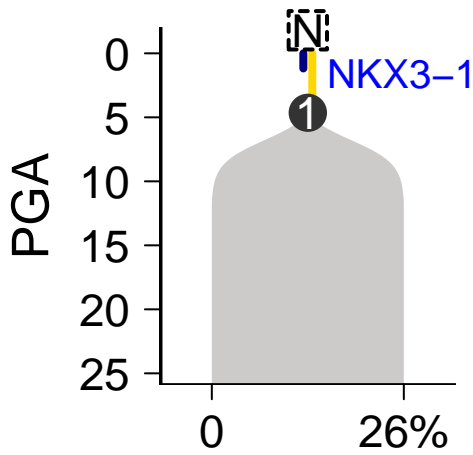

## SomaticSniper–TITAN

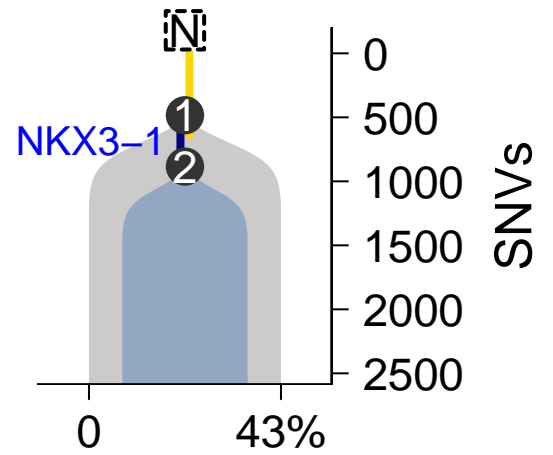

## MuTect–Battenberg

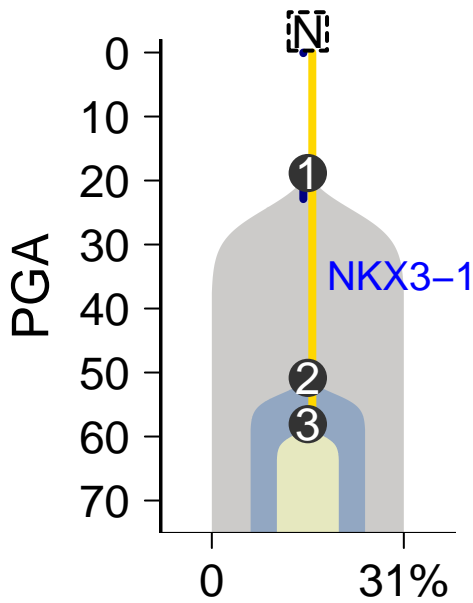

## MuTect–TITAN

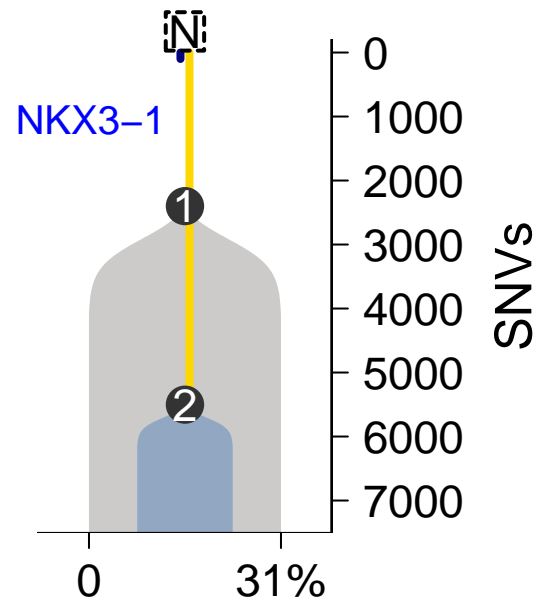

# CPCG0600

## SomaticSniper–Battenberg

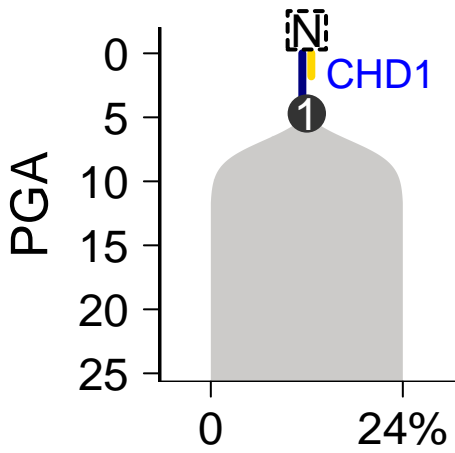

## SomaticSniper–TITAN

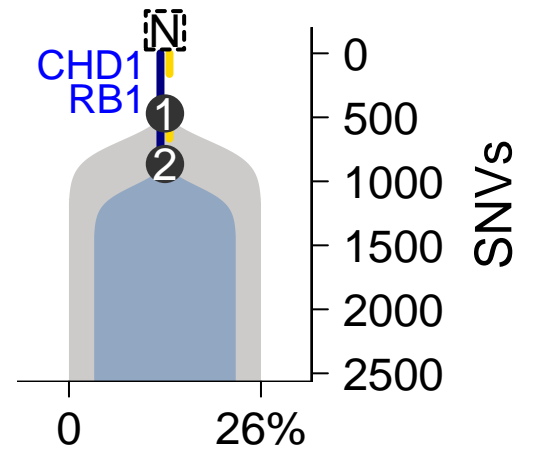

## MuTect–Battenberg

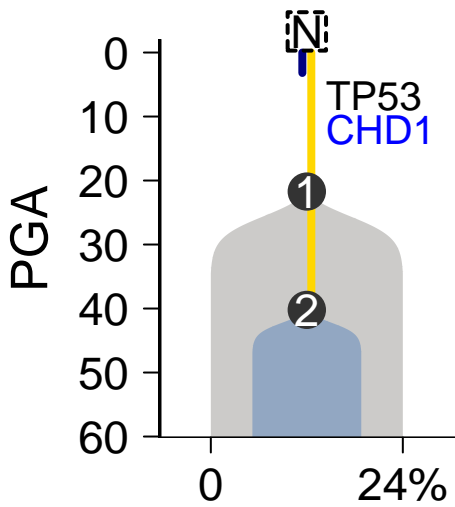

## MuTect–TITAN

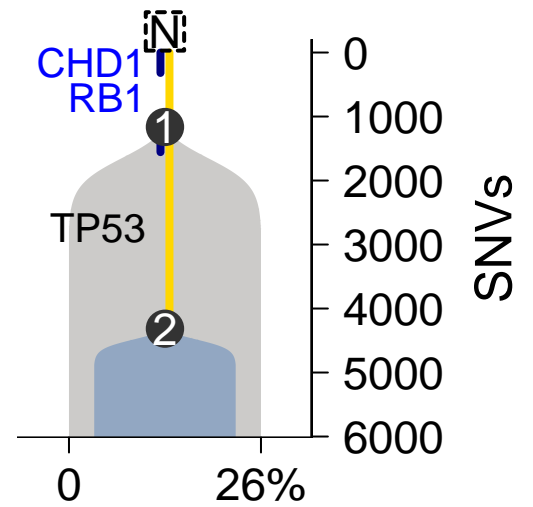

# CPCG0601

## SomaticSniper-Battenberg

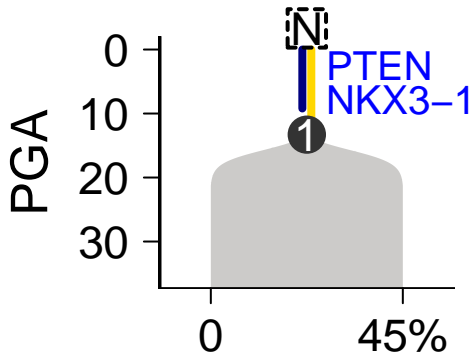

## SomaticSniper-TITAN

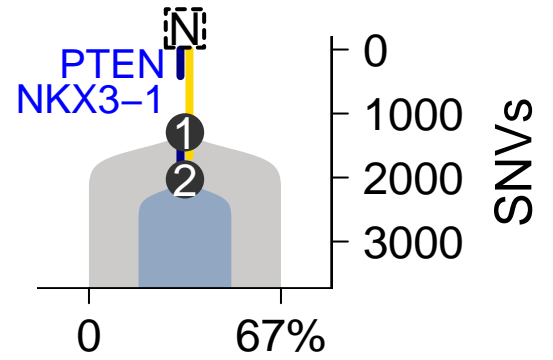

## MuTect-Battenberg

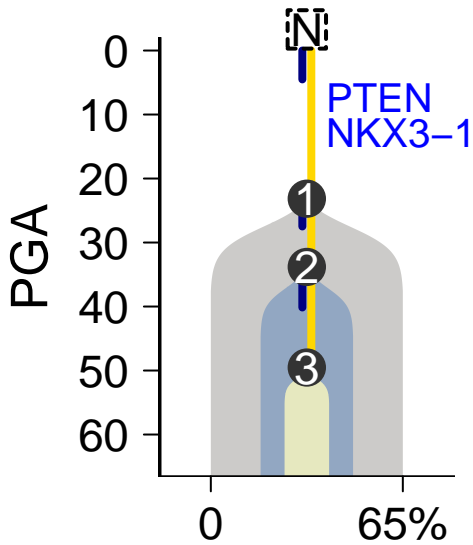

## MuTect-TITAN

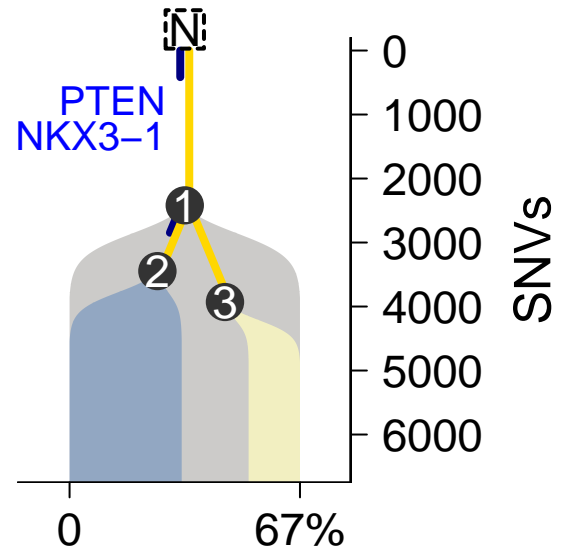

# CPCG0604

## SomaticSniper-Battenberg

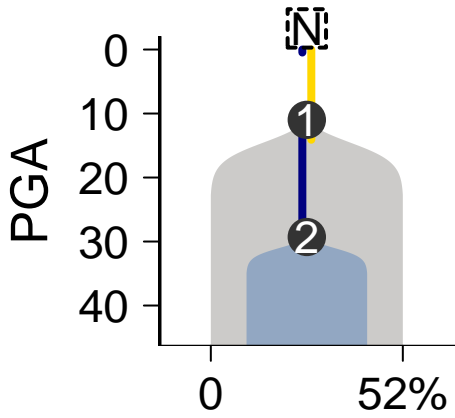

## SomaticSniper-TITAN

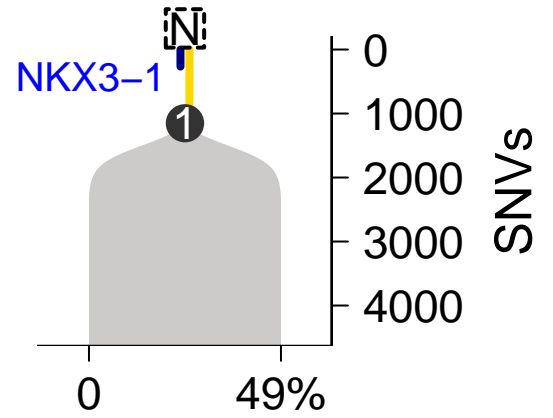

## MuTect-Battenberg

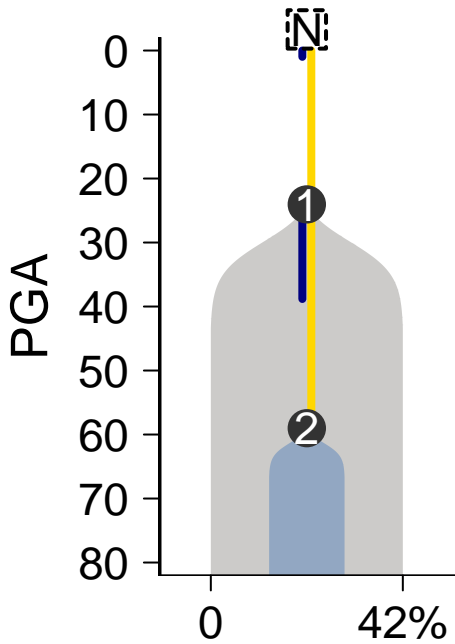

## MuTect-TITAN

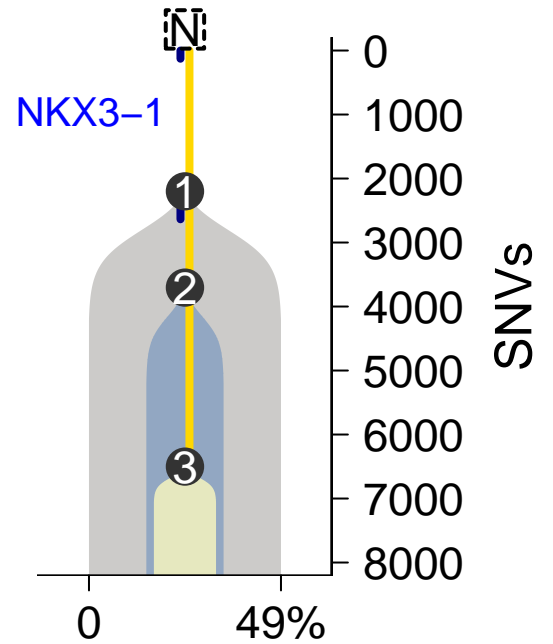

# CPCG0605

## SomaticSniper-Battenberg

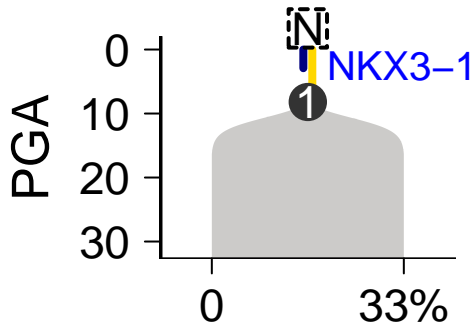

## SomaticSniper-TITAN

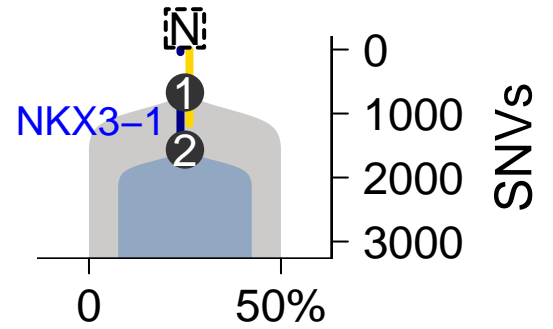

## MuTect-Battenberg

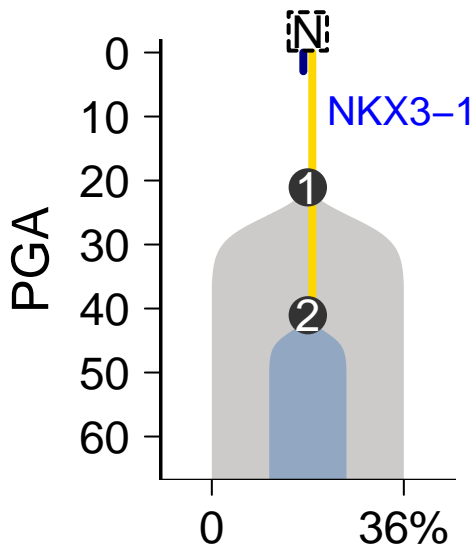

## MuTect-TITAN

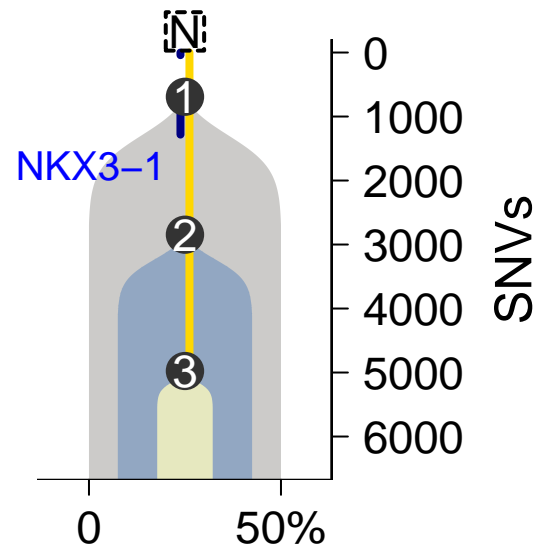

# CPCG0606

## SomaticSniper-Battenberg

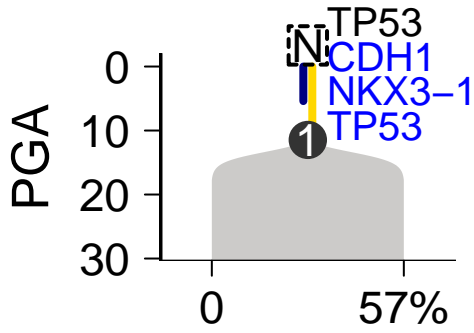

## SomaticSniper-TITAN

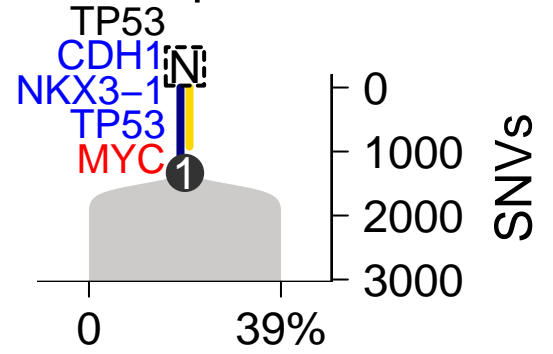

## MuTect-Battenberg

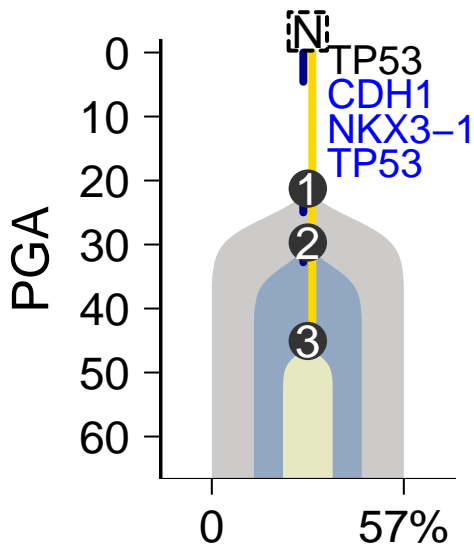

## MuTect-TITAN

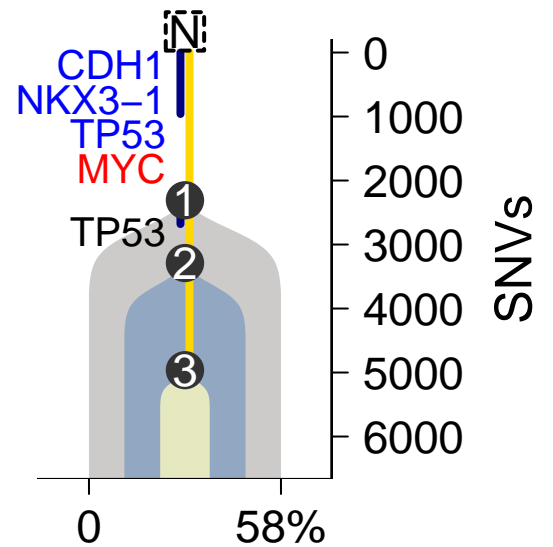

# TCGA\_5503\_T1\_wgs

## SomaticSniper-Battenberg

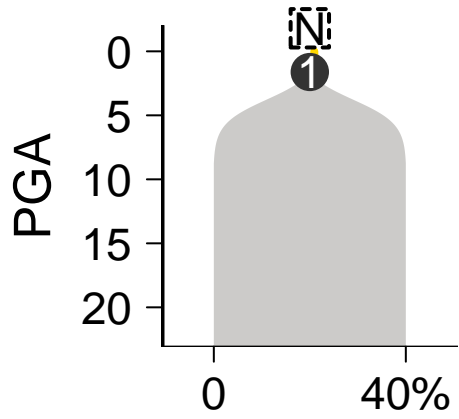

## SomaticSniper-TITAN

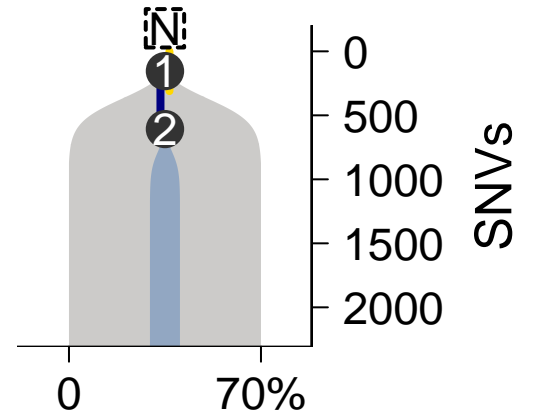



# TCGA\_5506\_T1\_wgs

## SomaticSniper-Battenberg

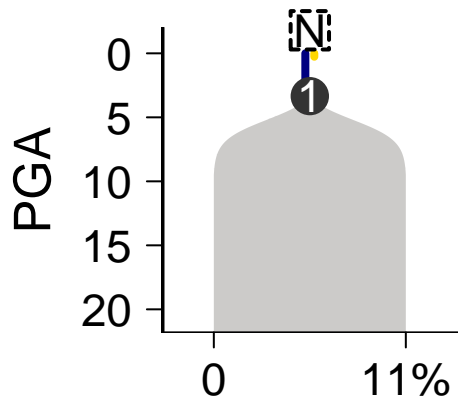

## SomaticSniper-TITAN

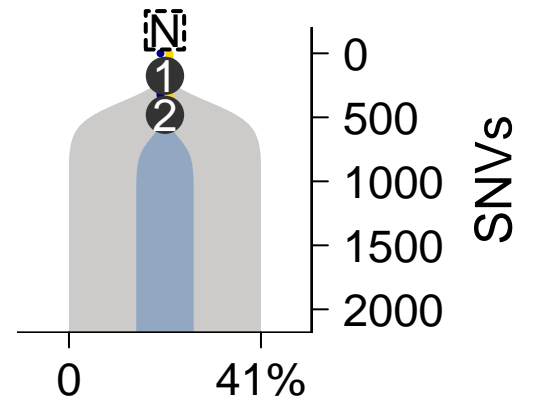

## MuTect-TITAN

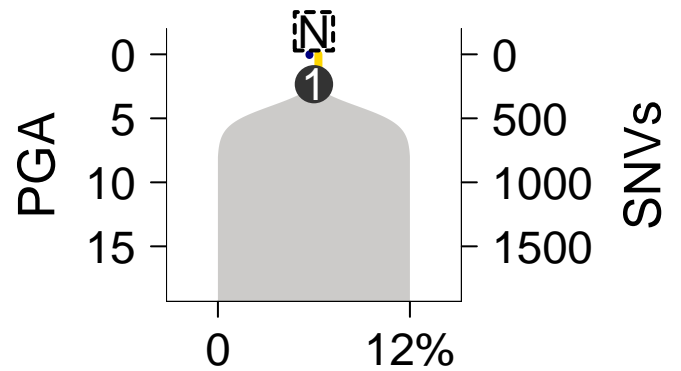

# TCGA\_5750\_T1\_wgs

## SomaticSniper-Battenberg

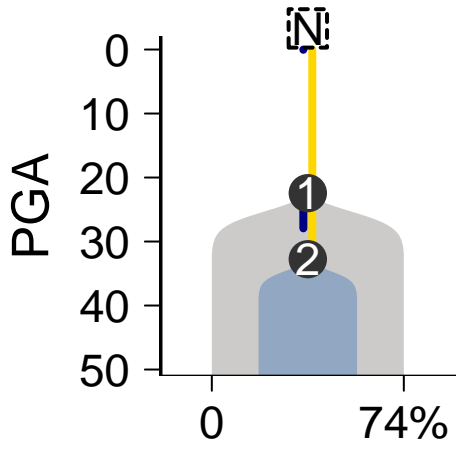

## SomaticSniper-TITAN

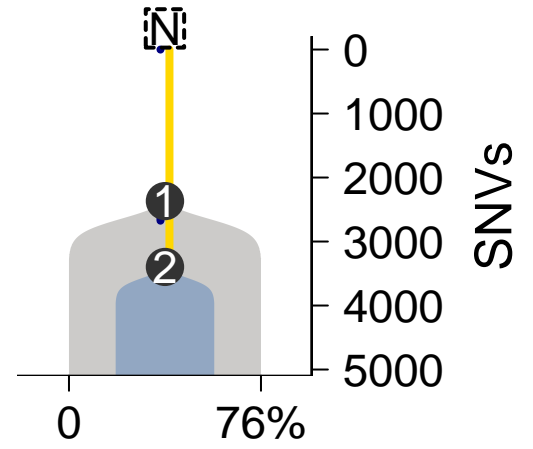

## MuTect-TITAN

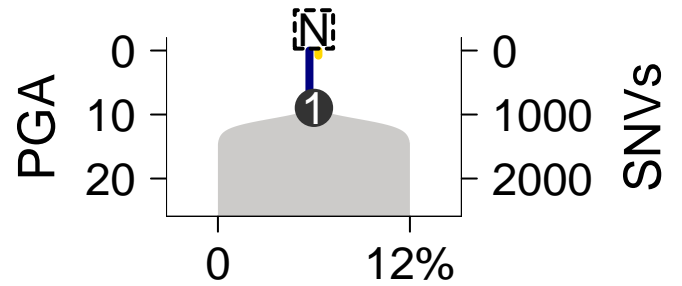

# TCGA\_5763\_T1\_wgs

## SomaticSniper-Battenberg

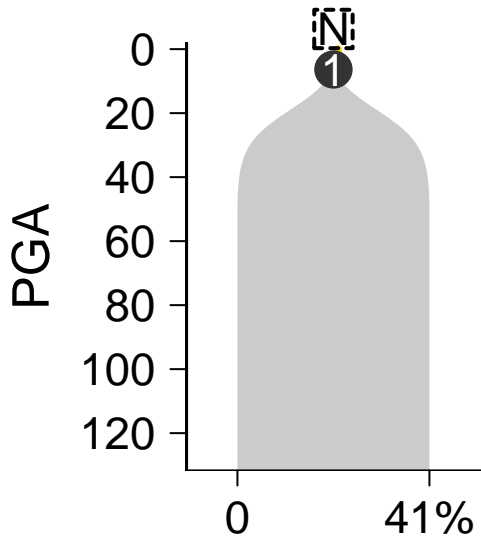

## SomaticSniper-TITAN

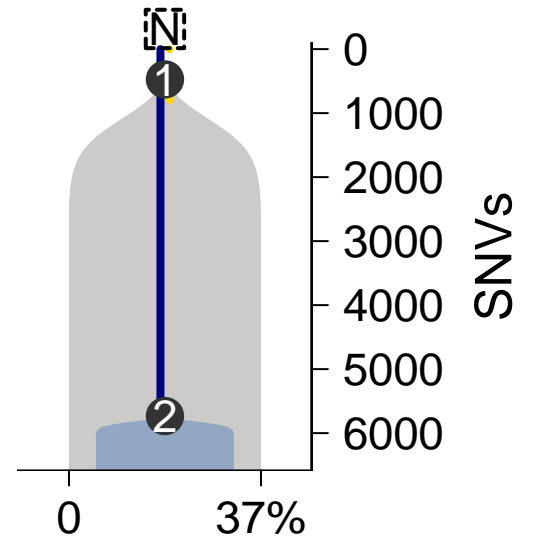

## MuTect-TITAN

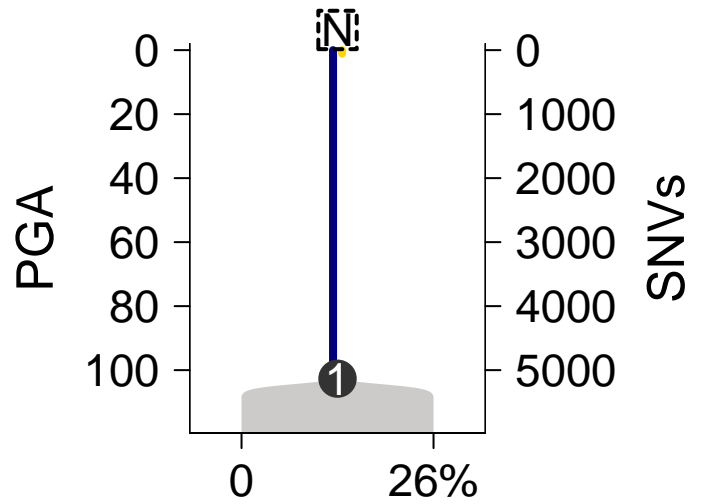

# TCGA\_5771\_T1\_wgs

## SomaticSniper-Battenberg

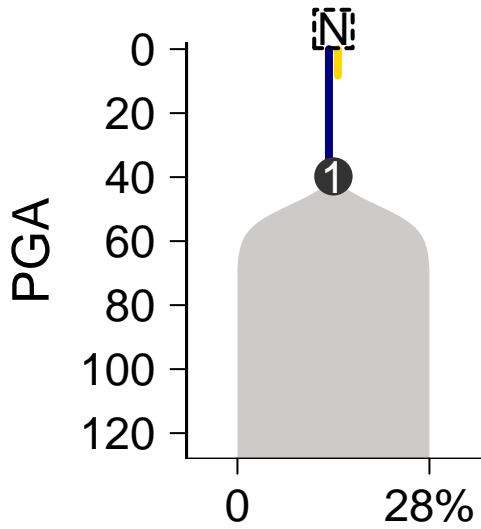

## SomaticSniper-TITAN

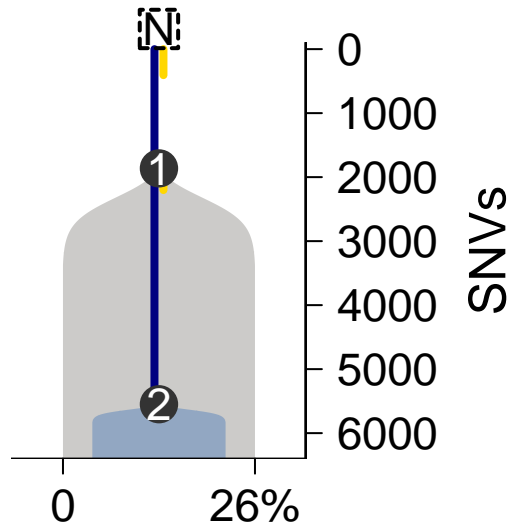

# TCGA\_5788\_T1\_wgs

## SomaticSniper-Battenberg

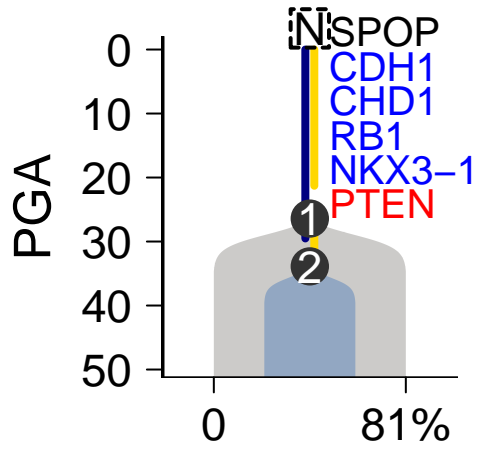

## SomaticSniper-TITAN

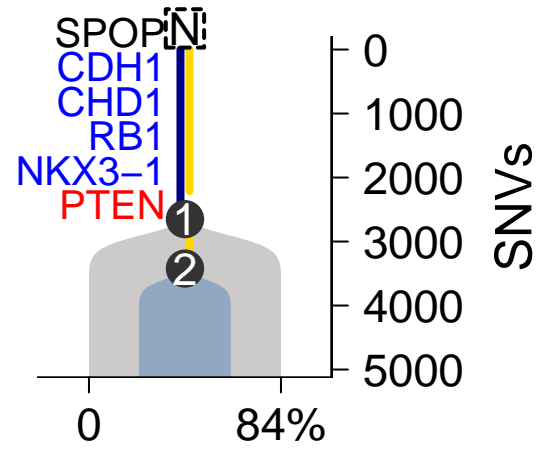

# TCGA\_5789\_T1\_wgs

## SomaticSniper-Battenberg

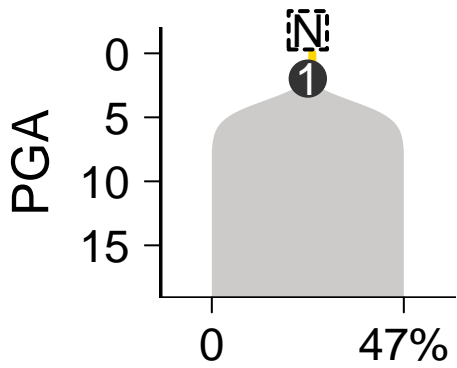

## SomaticSniper-TITAN

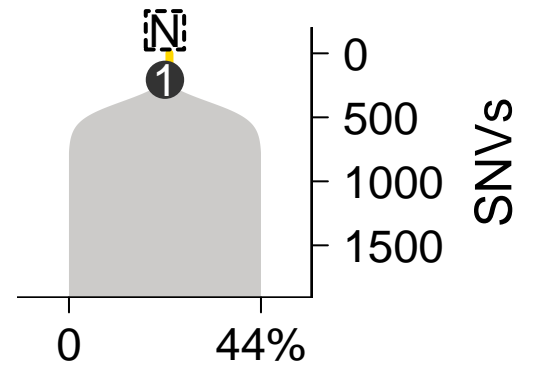

## MuTect-Battenberg

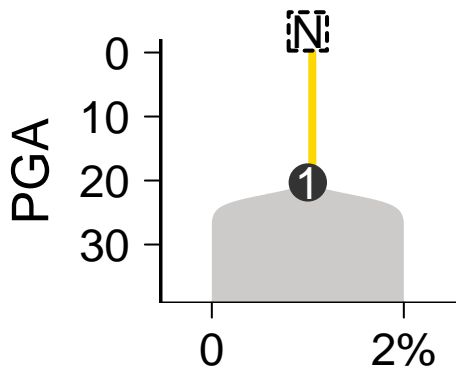

## MuTect-TITAN

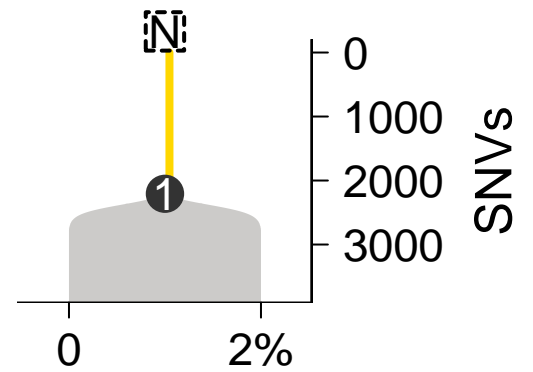

# TCGA\_6336\_T1\_wgs

## SomaticSniper-Battenberg

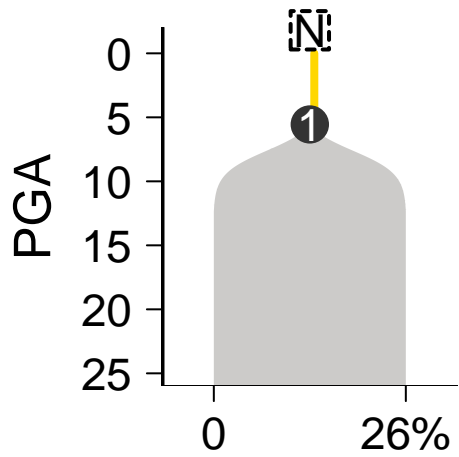

## SomaticSniper-TITAN

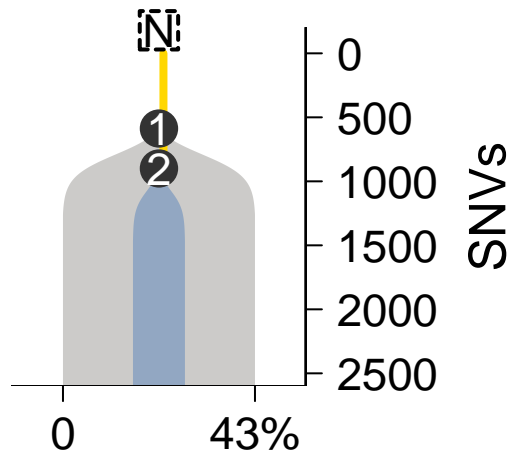

# TCGA\_6365\_T1\_wgs

## SomaticSniper-Battenberg

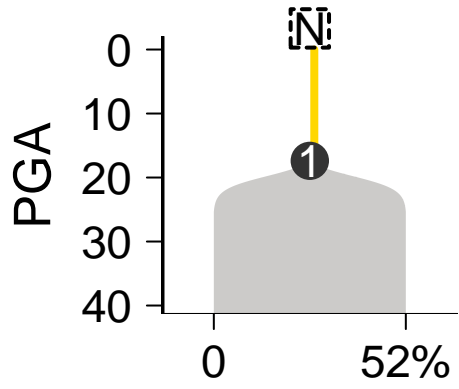

## SomaticSniper-TITAN

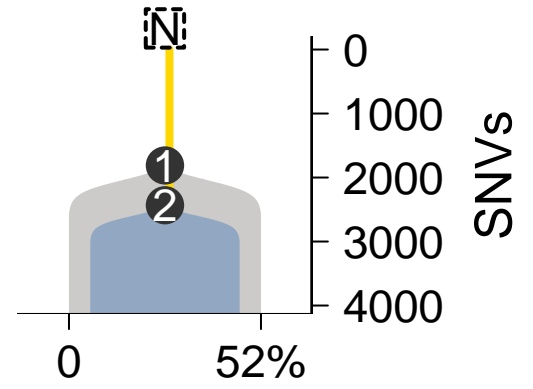



# TCGA\_6370\_T1\_wgs

## SomaticSniper-Battenberg

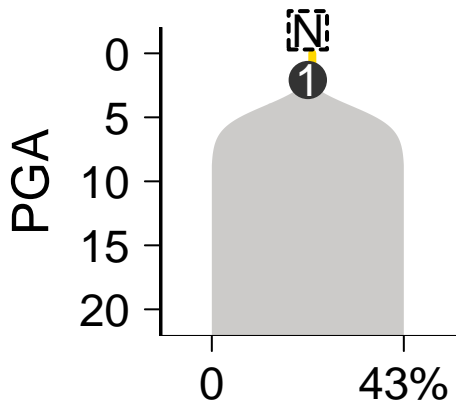

## SomaticSniper-TITAN

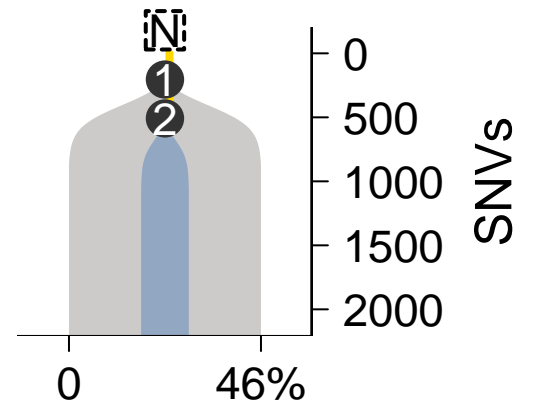

## MuTect-Battenberg

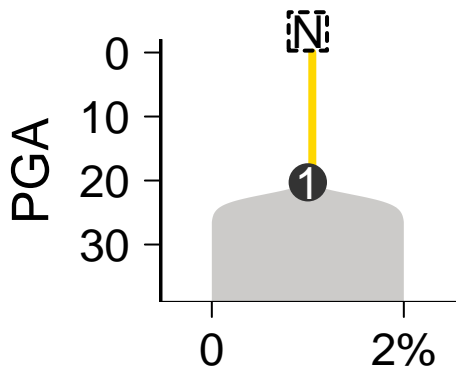

## MuTect-TITAN

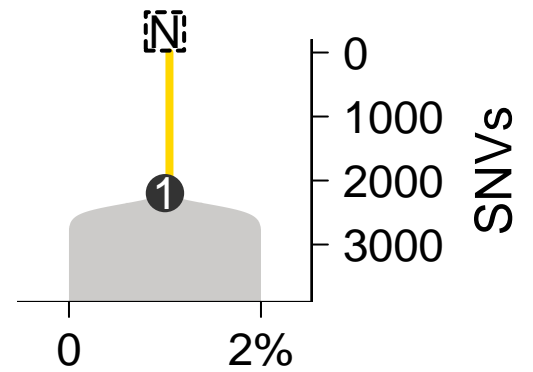

# TCGA\_7075\_T1\_wgs

## SomaticSniper-Battenberg

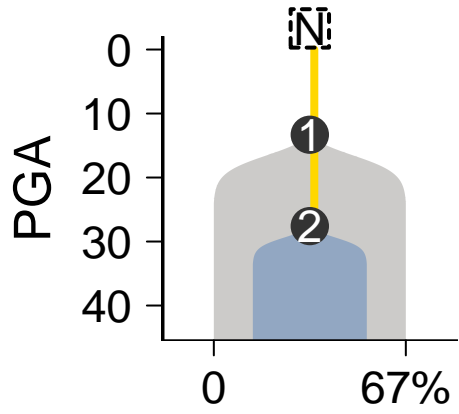

## SomaticSniper-TITAN

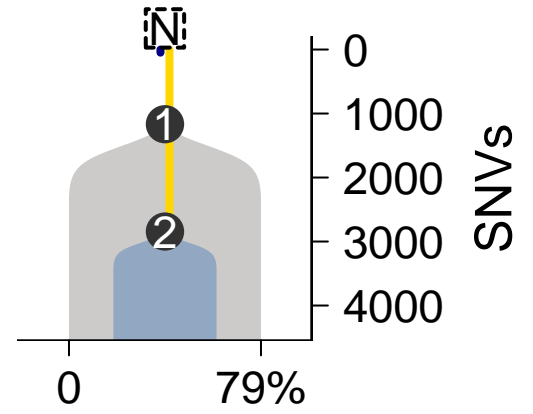

# TCGA\_7079\_T1\_wgs

## SomaticSniper-Battenberg

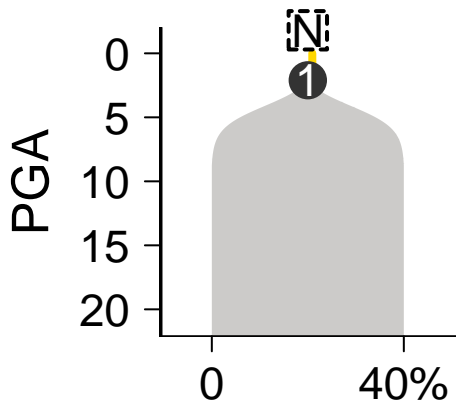

## SomaticSniper-TITAN

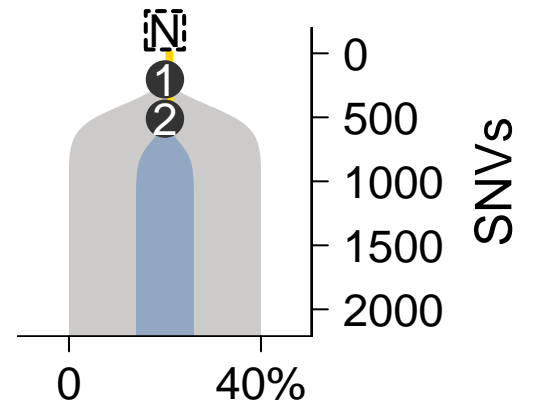

## MuTect-Battenberg

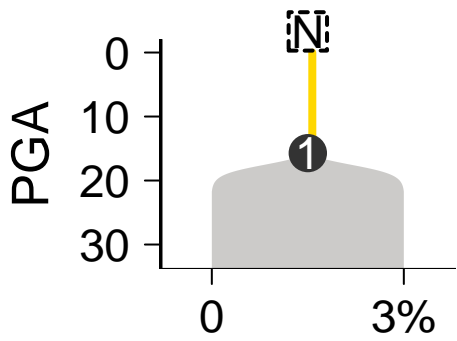

## MuTect-TITAN

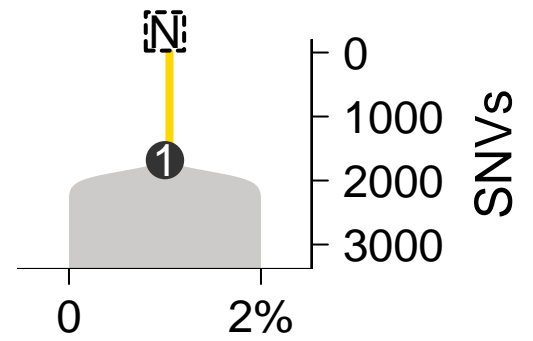

# TCGA\_7169\_T1\_wgs

## SomaticSniper-Battenberg

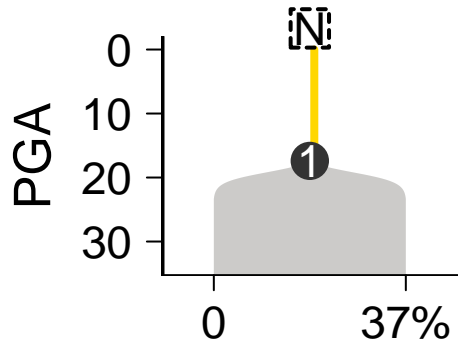

## SomaticSniper-TITAN

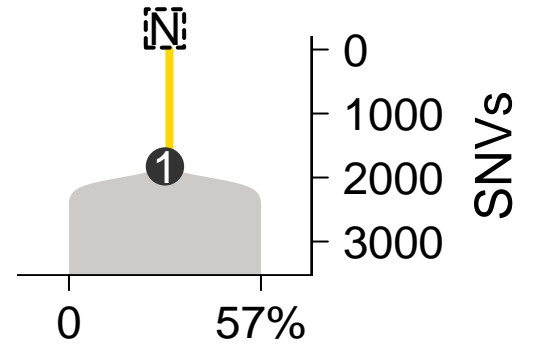

# TCGA\_7233\_T1\_wgs

## SomaticSniper-Battenberg

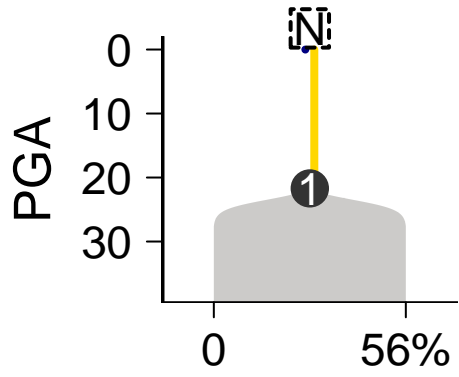

## SomaticSniper-TITAN

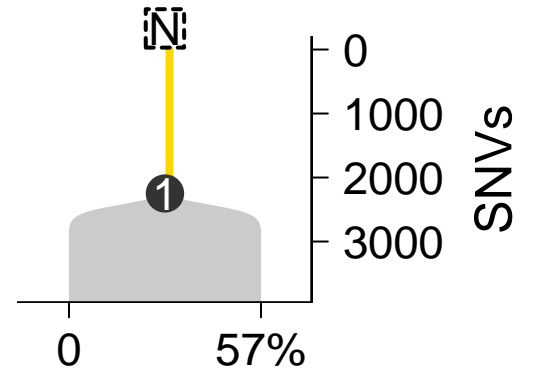

# TCGA\_7522\_T1\_wgs

SomaticSniper-Battenberg

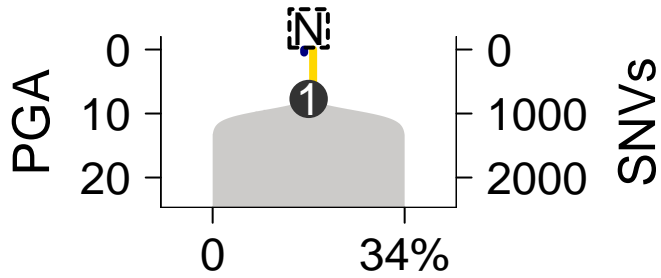

SomaticSniper-TITAN

Poly-tumour

MuTect-TITAN

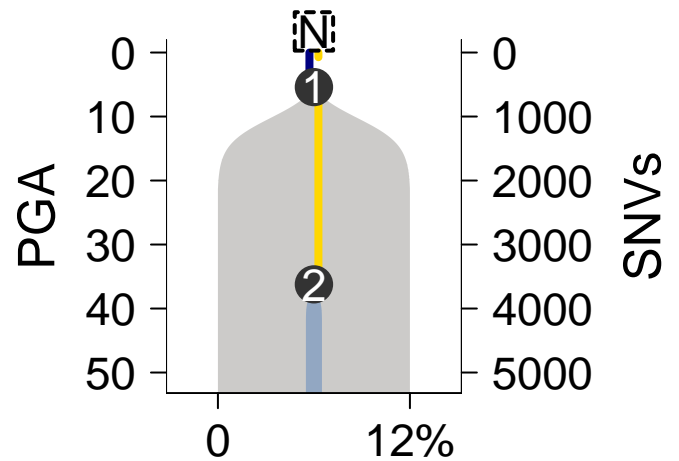

# TCGA\_7737\_T1\_wgs

## SomaticSniper-Battenberg

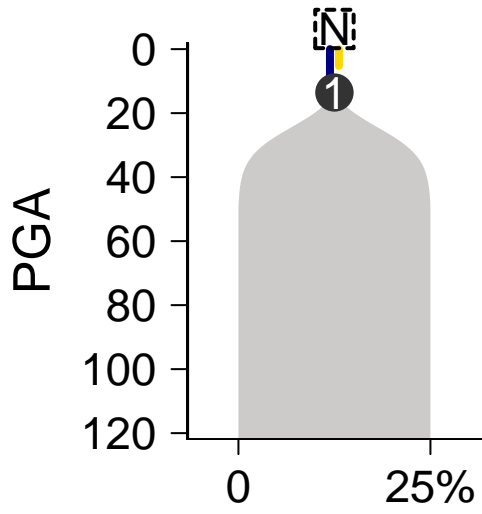

## SomaticSniper-TITAN

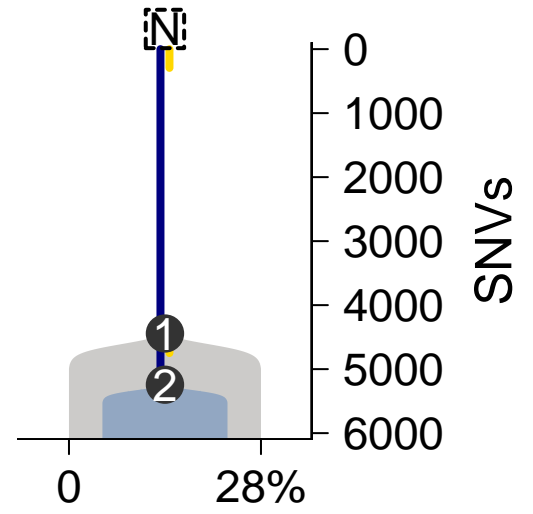

# TCGA\_7740\_T1\_wgs

## SomaticSniper-Battenberg

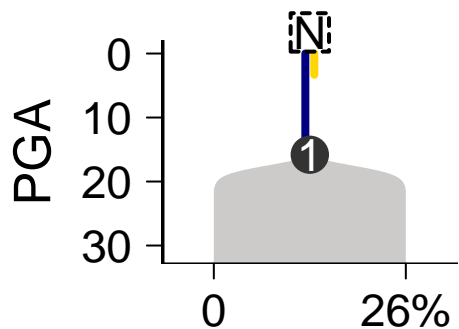

## SomaticSniper-TITAN

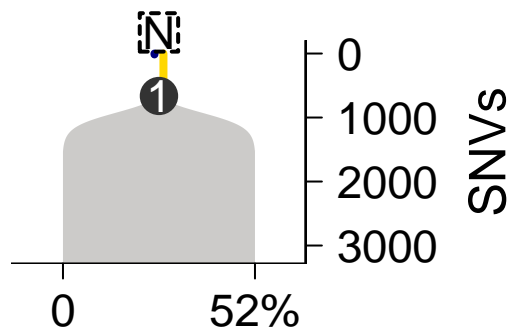

## MuTect-TITAN

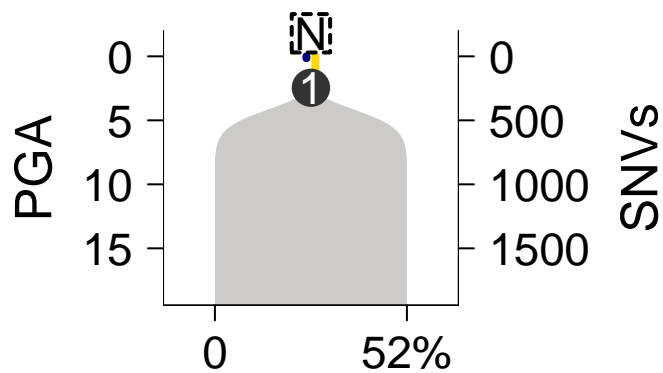



# TCGA\_7744\_T1\_wgs

## SomaticSniper-Battenberg

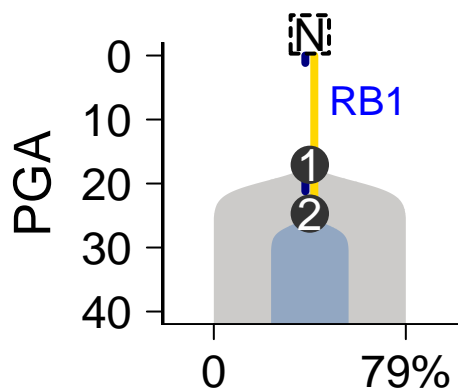

## SomaticSniper-TITAN

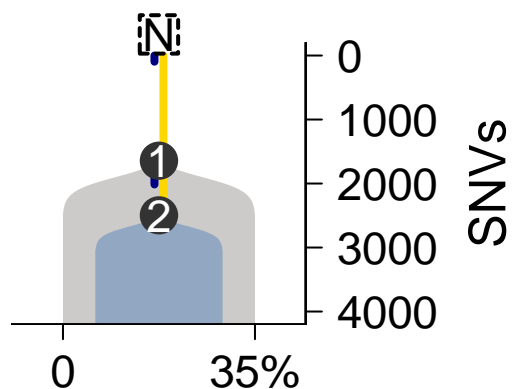

## MuTect-TITAN

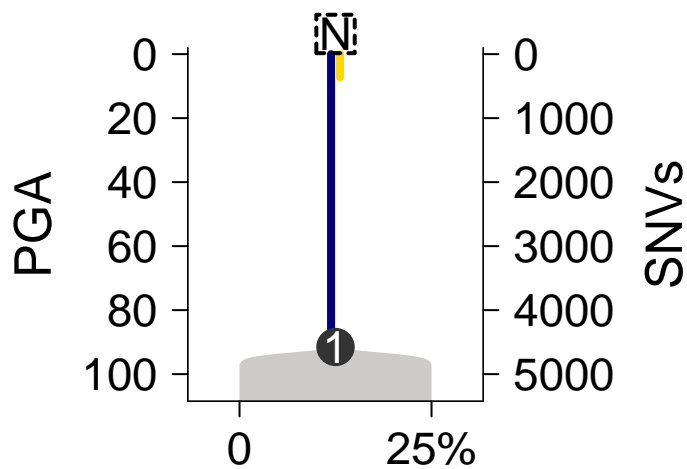

# TCGA\_7791\_T1\_wgs

## SomaticSniper-Battenberg

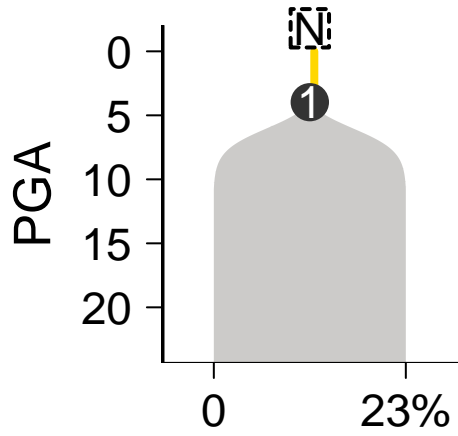

## SomaticSniper-TITAN

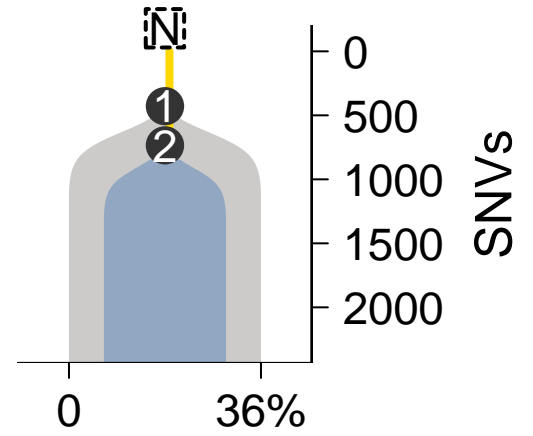

# TCGA\_8258\_T1\_wgs

## SomaticSniper-Battenberg

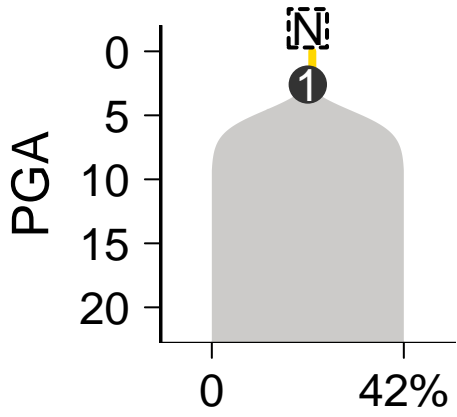

## SomaticSniper-TITAN

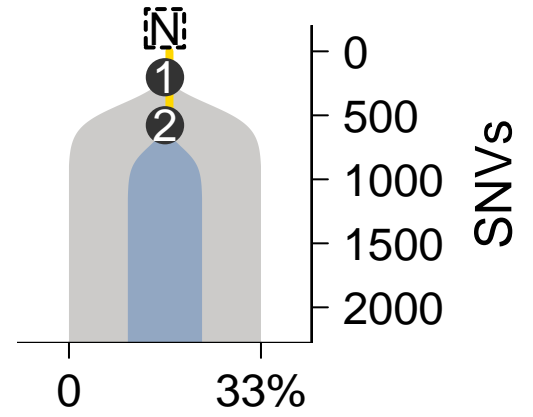

## MuTect-TITAN

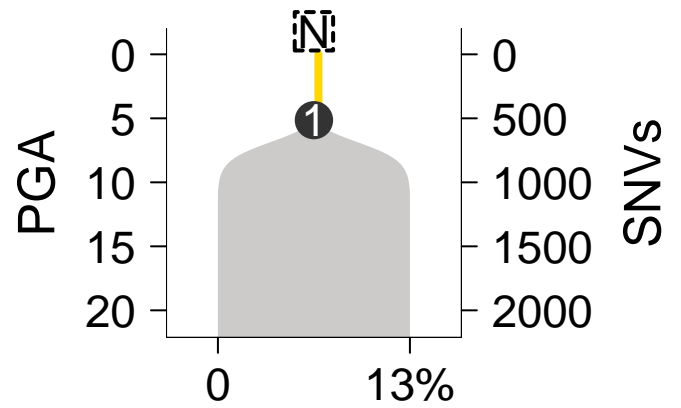

# Weischenfeldt\_010\_T\_wgs

## SomaticSniper-Battenberg

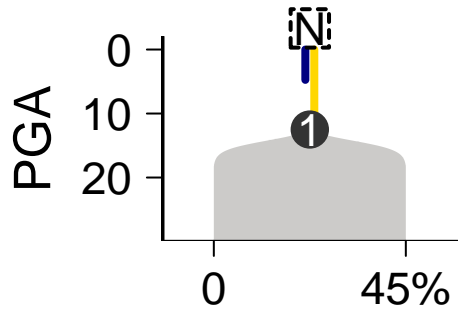

## SomaticSniper-TITAN

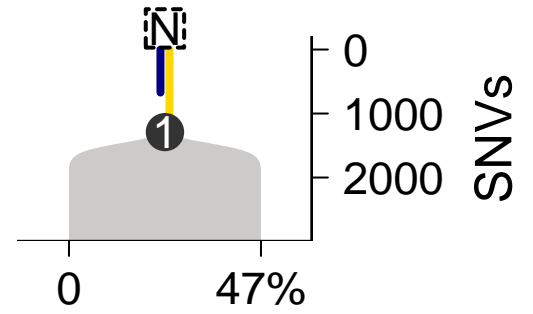

## MuTect-Battenberg

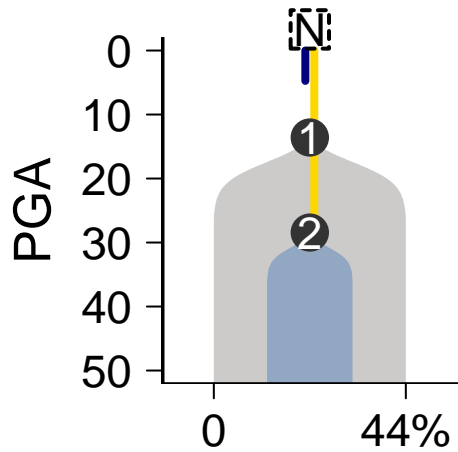

## MuTect-TITAN

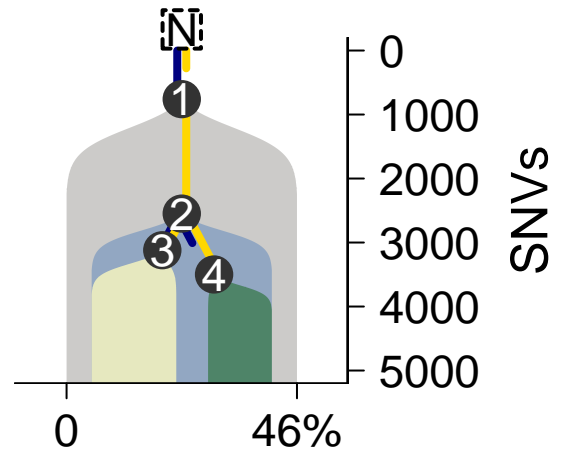

# Weischenfeldt\_011\_T\_wgs

## SomaticSniper-Battenberg

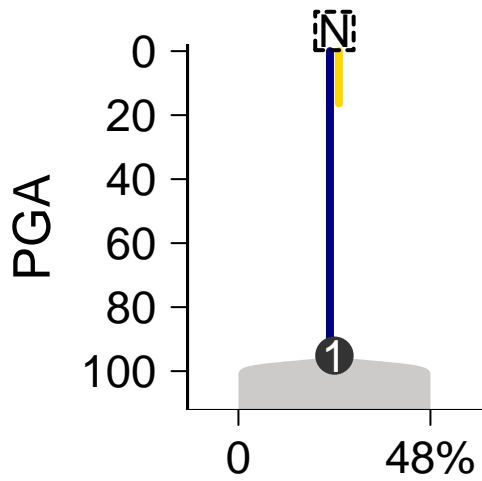

## SomaticSniper-TITAN

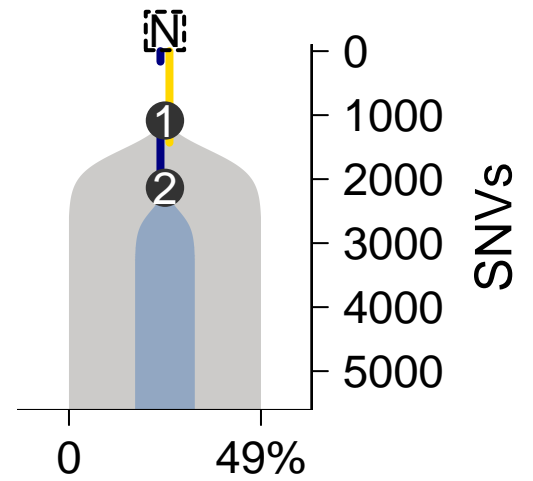

## MuTect-Battenberg

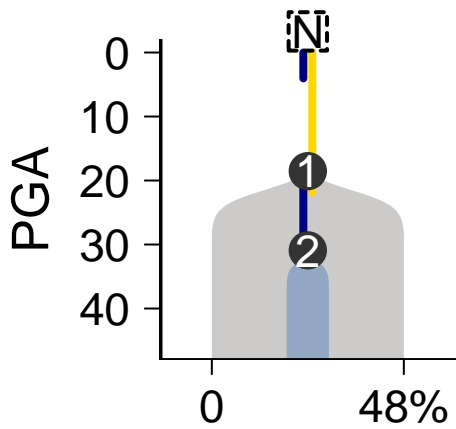

## MuTect-TITAN

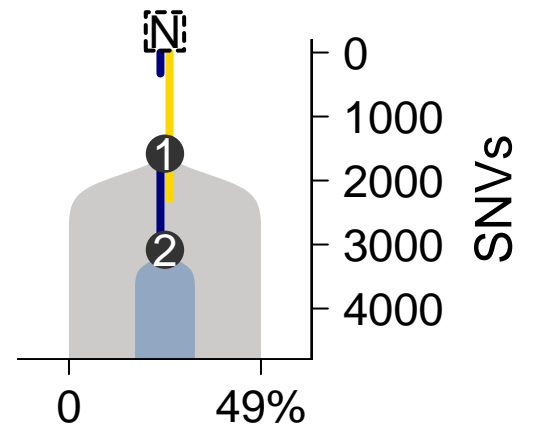

# Weischenfeldt\_01\_T\_wgs

## SomaticSniper-Battenberg

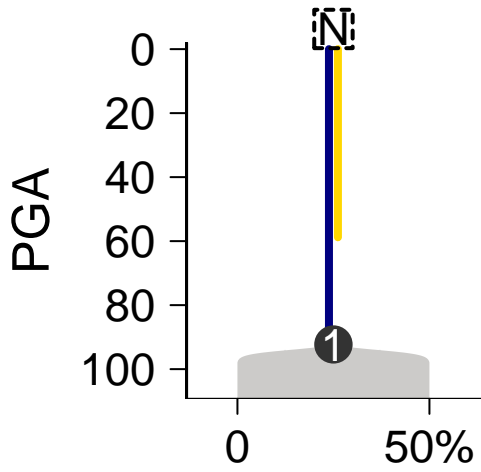

## SomaticSniper-TITAN

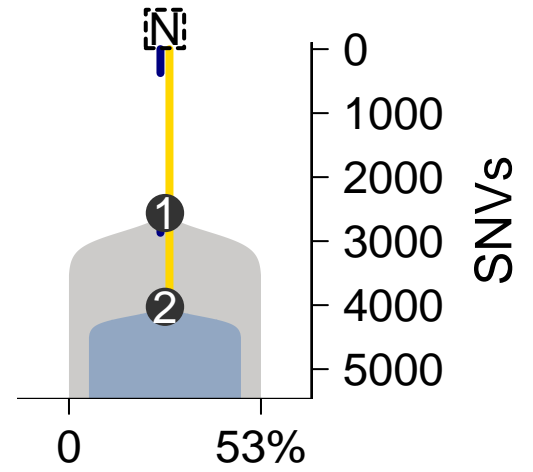

## MuTect-Battenberg

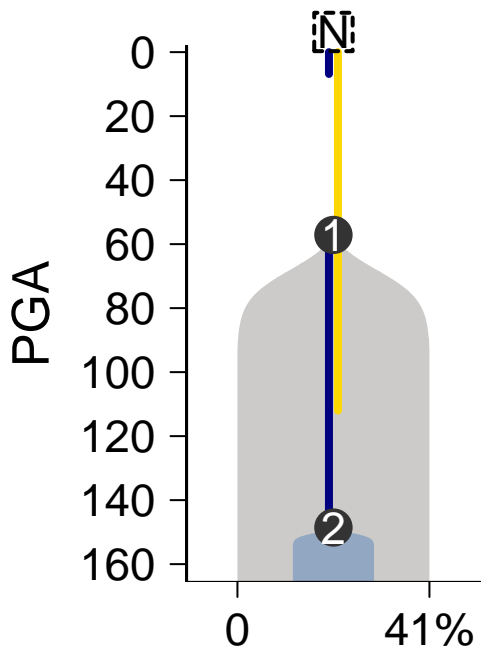

## MuTect-TITAN

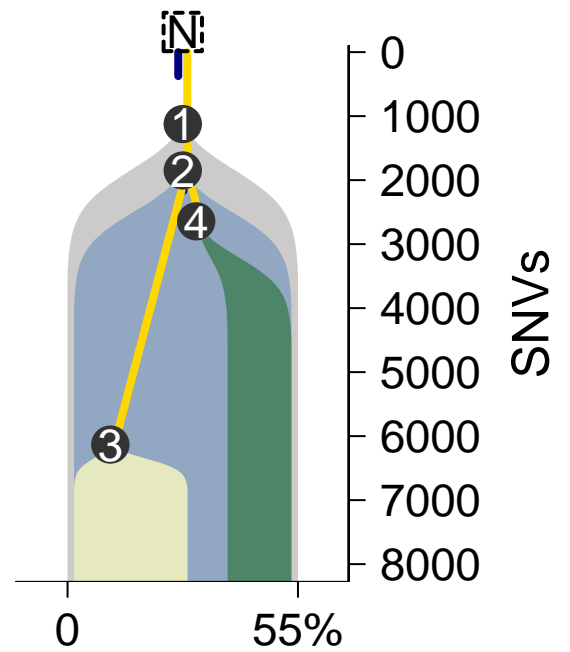

# Weischenfeldt\_02\_T\_wgs

## SomaticSniper-Battenberg

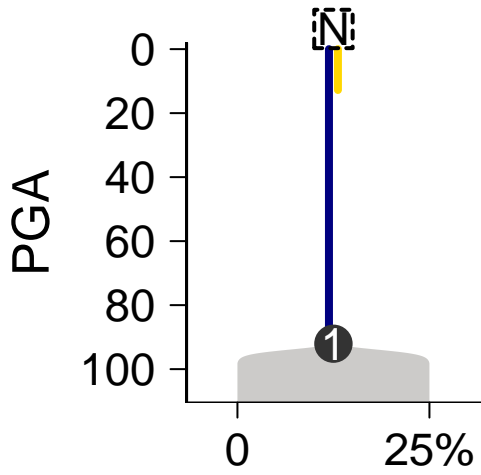

## SomaticSniper-TITAN

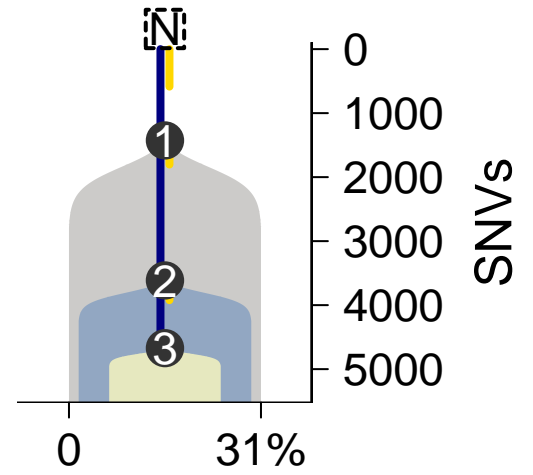

## MuTect-Battenberg

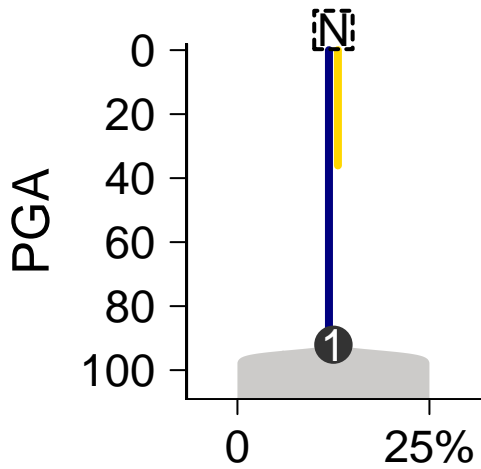

## MuTect-TITAN

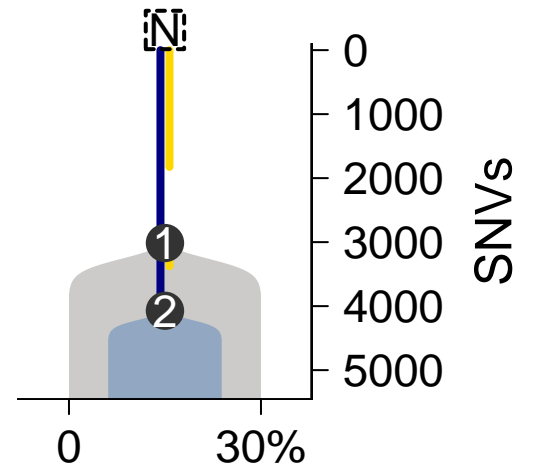

# Weischenfeldt\_03\_T\_wgs

## SomaticSniper-Battenberg

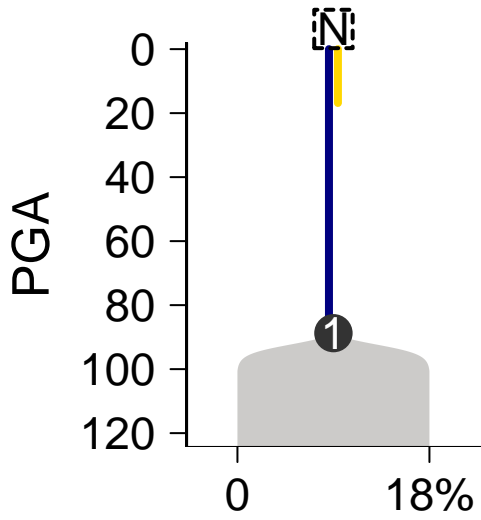

## SomaticSniper-TITAN

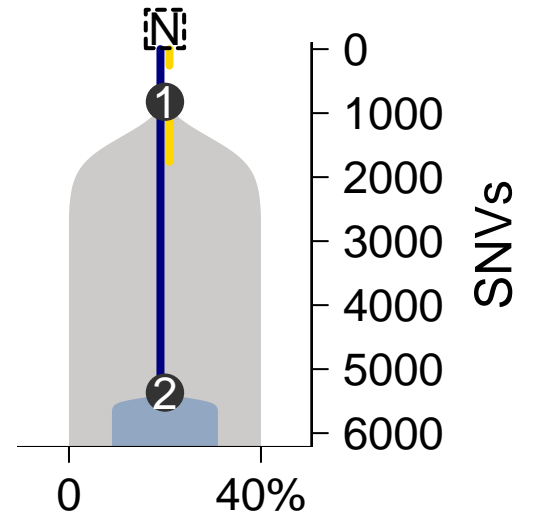

## MuTect-Battenberg

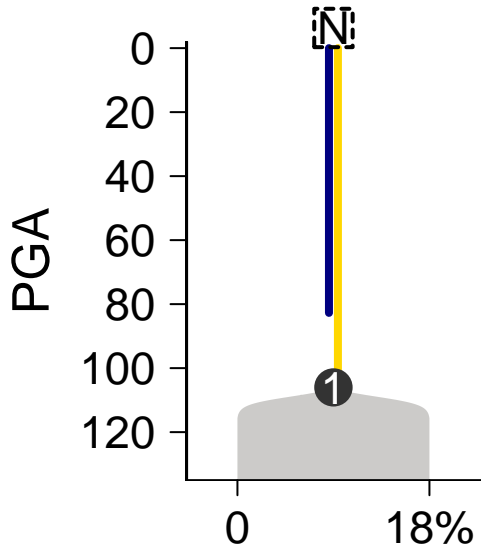

## MuTect-TITAN

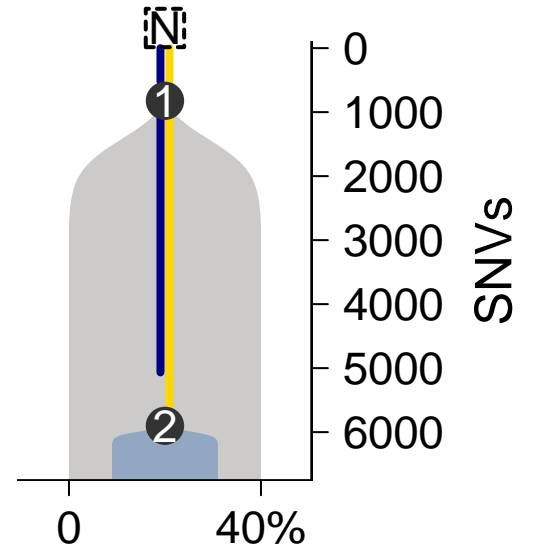



# Weischenfeldt\_04\_T\_wgs

## SomaticSniper-Battenberg

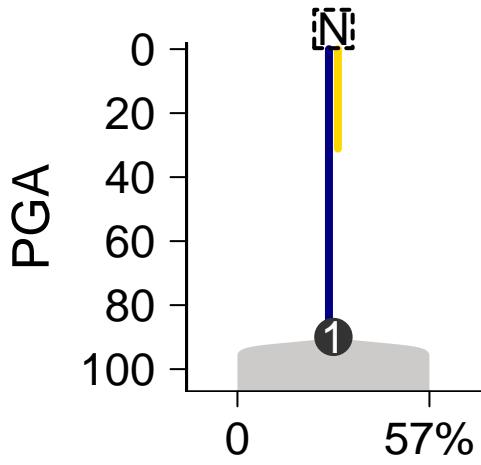

## SomaticSniper-TITAN

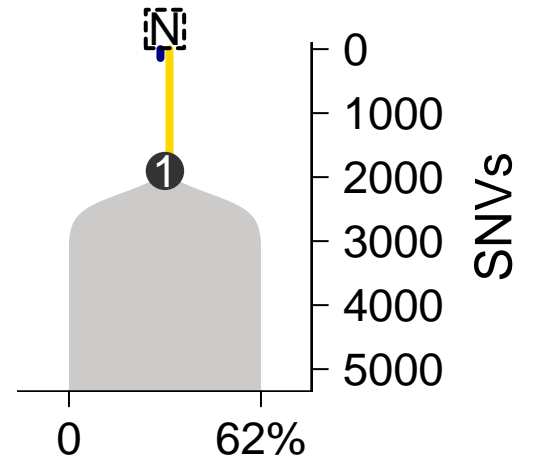

## MuTect-Battenberg

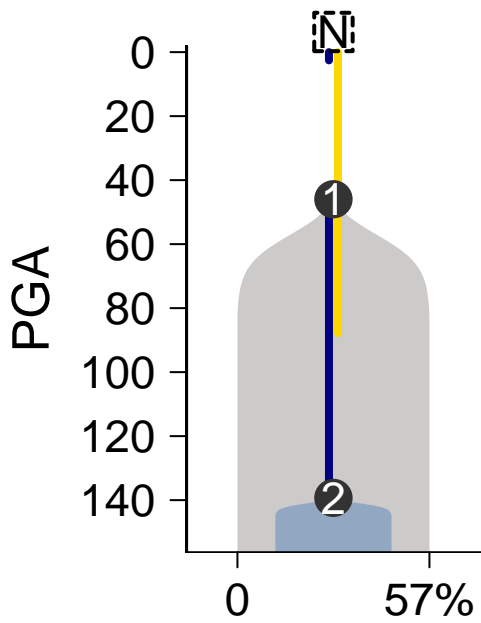

## MuTect-TITAN

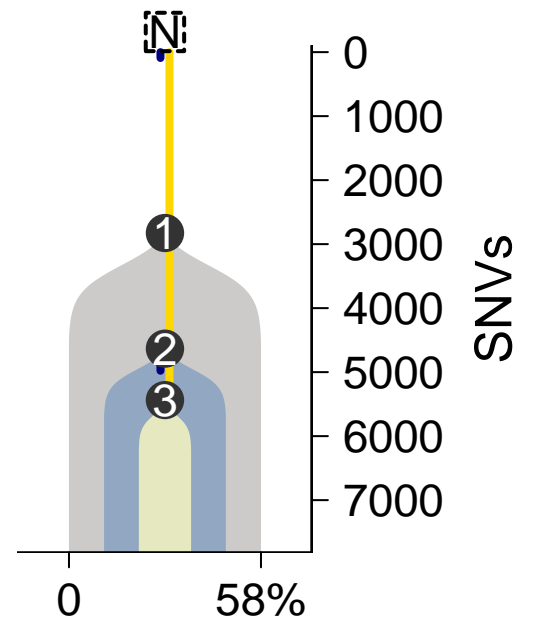

# Weischenfeldt\_05\_T\_wgs

## SomaticSniper-Battenberg

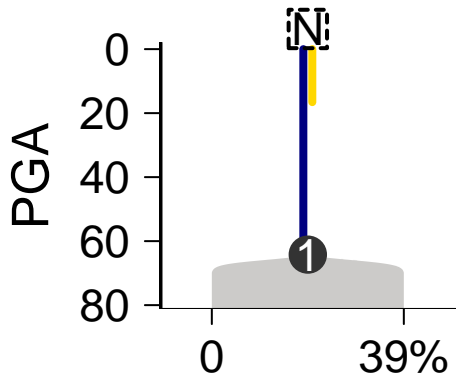

## SomaticSniper-TITAN

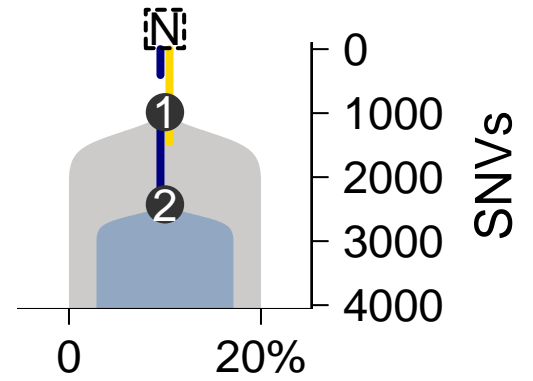

## MuTect-Battenberg

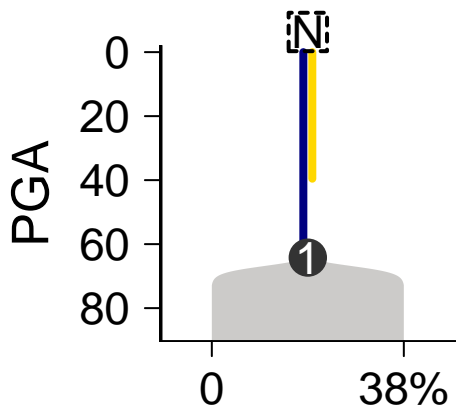

## MuTect-TITAN

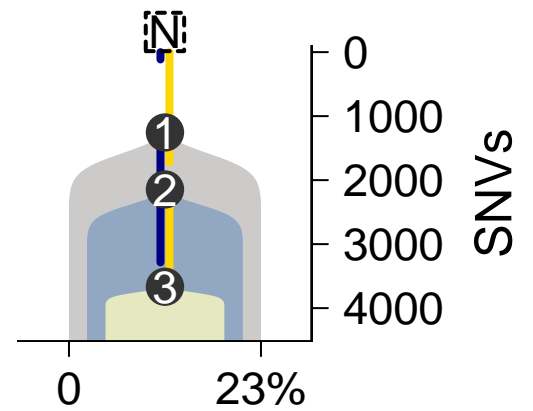

# Weischenfeldt\_06\_T\_wgs

## SomaticSniper-Battenberg

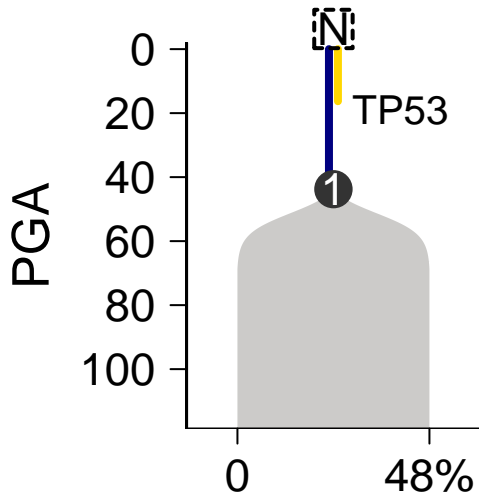

## SomaticSniper-TITAN

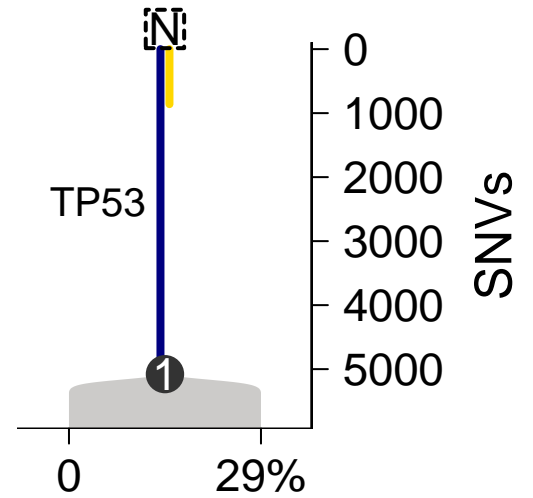

## MuTect-Battenberg

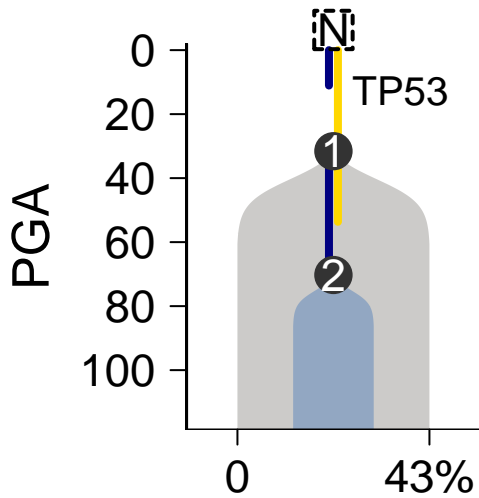

## MuTect-TITAN

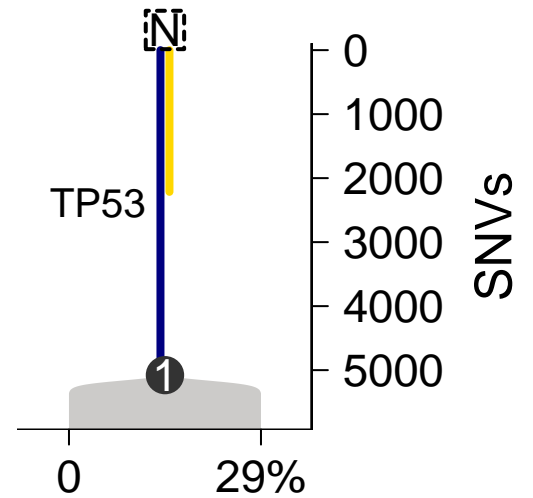

# Weischenfeldt\_07\_T\_wgs

## SomaticSniper-Battenberg

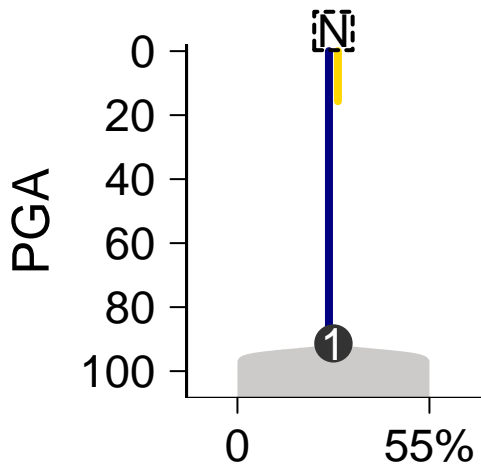

## SomaticSniper-TITAN

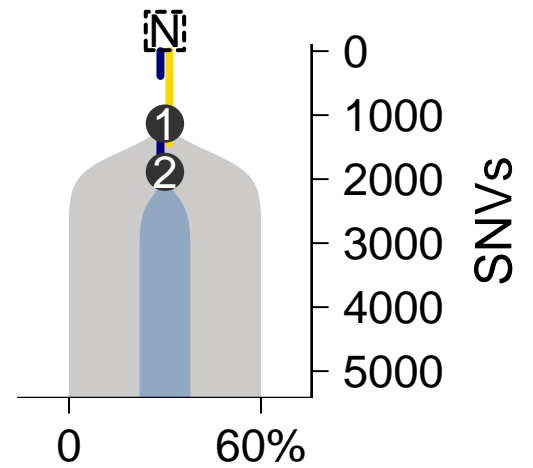

## MuTect-Battenberg

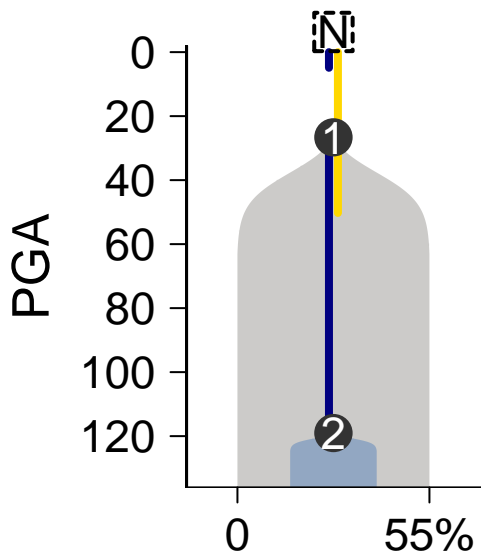

## MuTect-TITAN

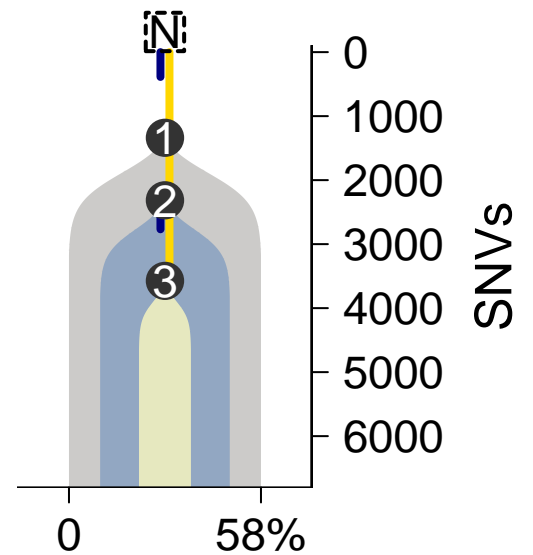

# Weischenfeldt\_08\_T\_wgs

## SomaticSniper-Battenberg

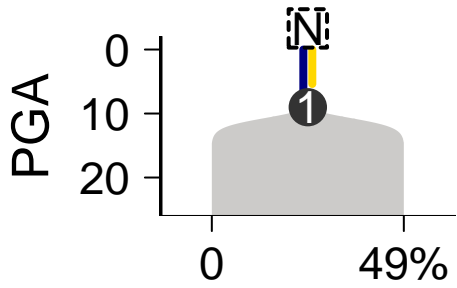

## SomaticSniper-TITAN

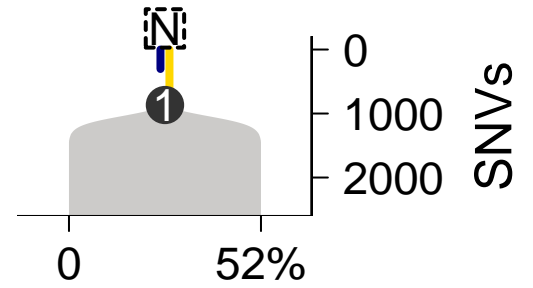

## MuTect-Battenberg

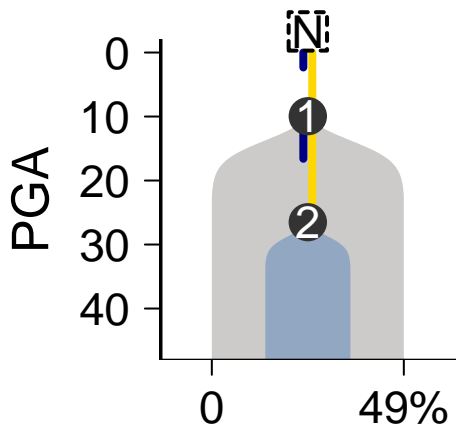

## MuTect-TITAN

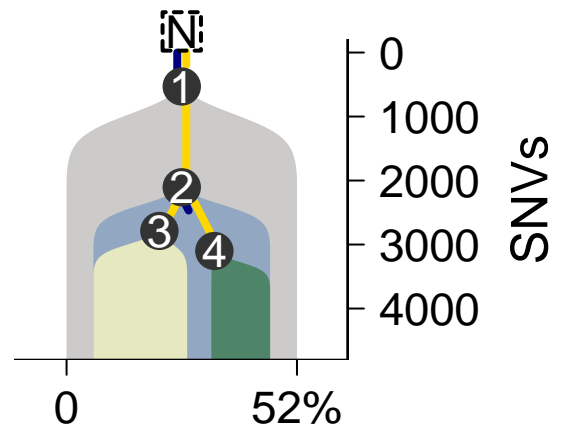

# Weischenfeldt\_09\_T\_wgs

## SomaticSniper-Battenberg

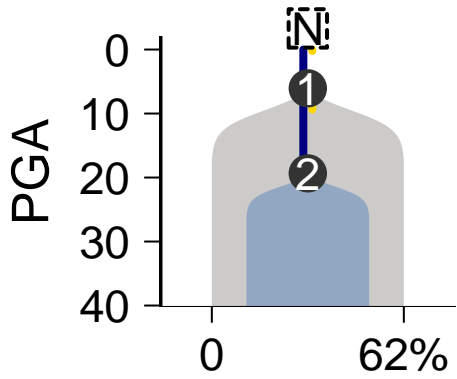

## SomaticSniper-TITAN

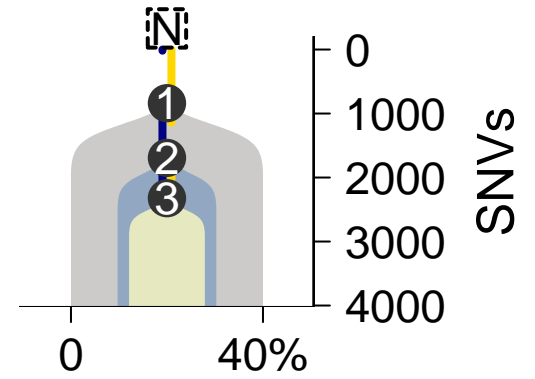

## MuTect-Battenberg

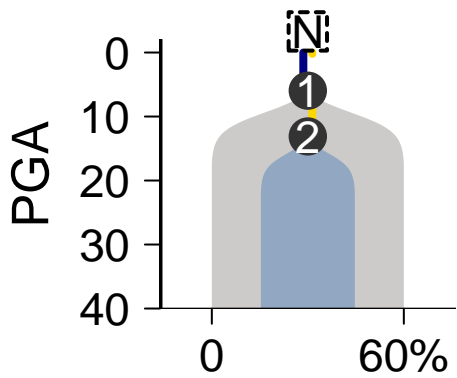

## MuTect-TITAN

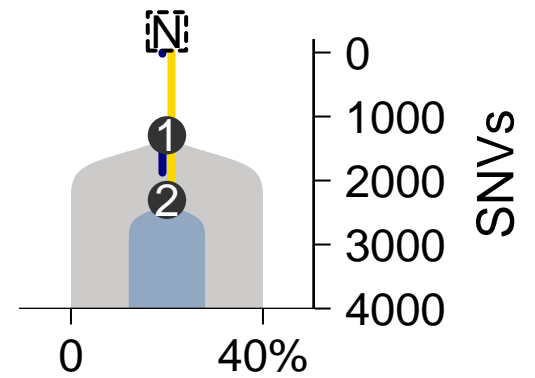

# CPCG0100-B1F1 MuTect-Battenberg

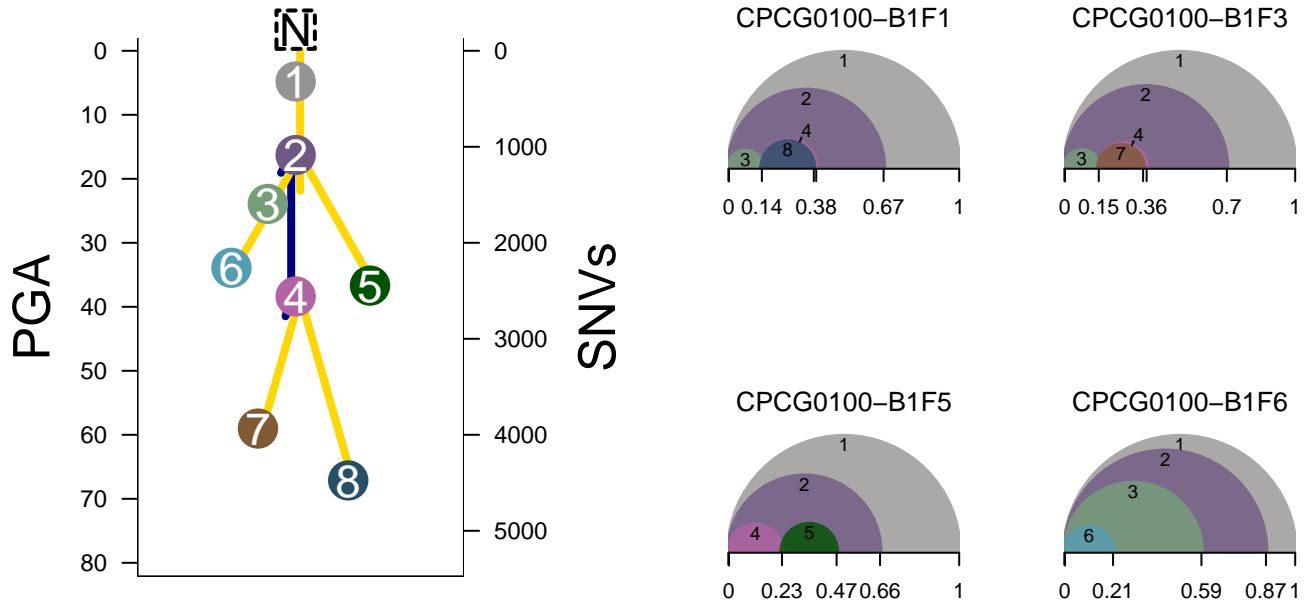

# CPCG0100-B1F1 MuTect-TITAN

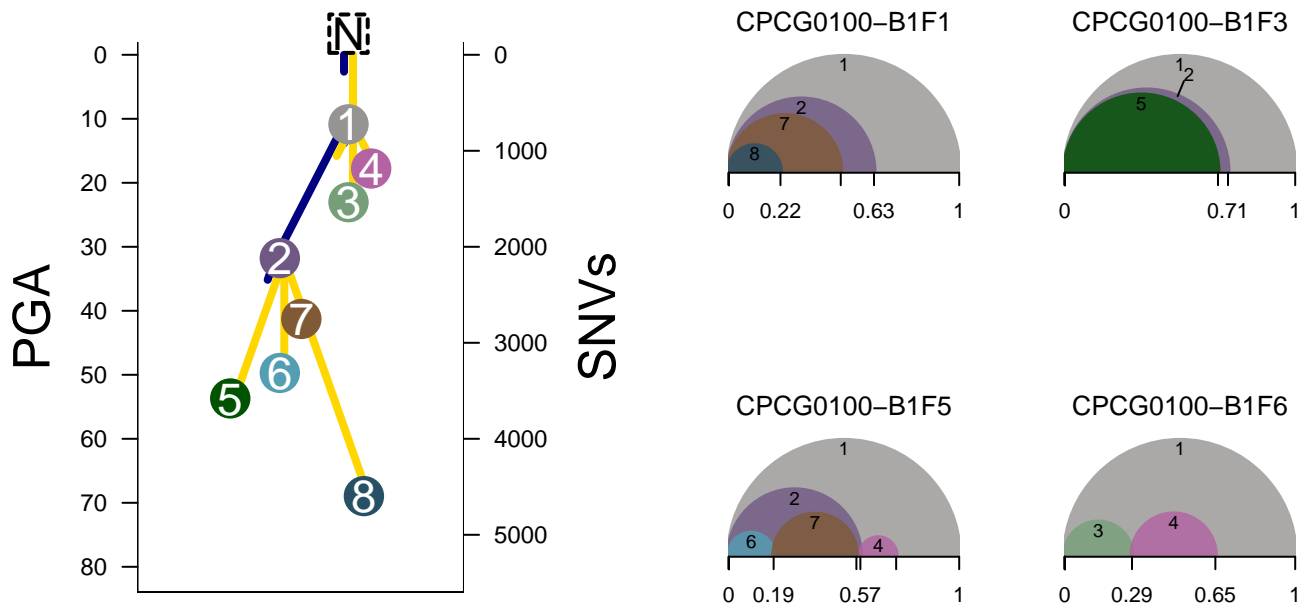

# CPCG0100-B1F1 SomaticSniper-Battenberg

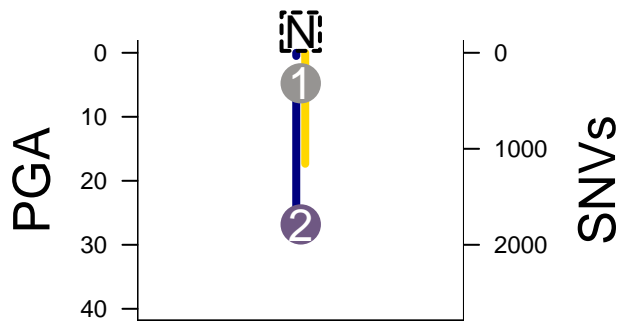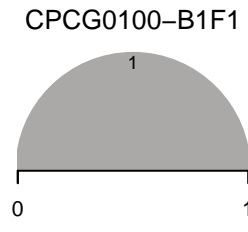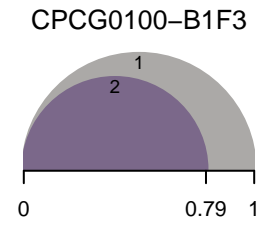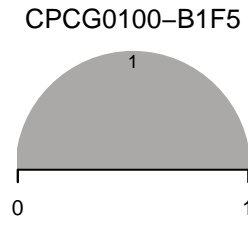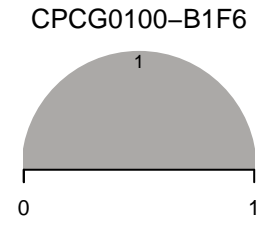

# CPCG0100-B1F1 SomaticSniper-TITAN

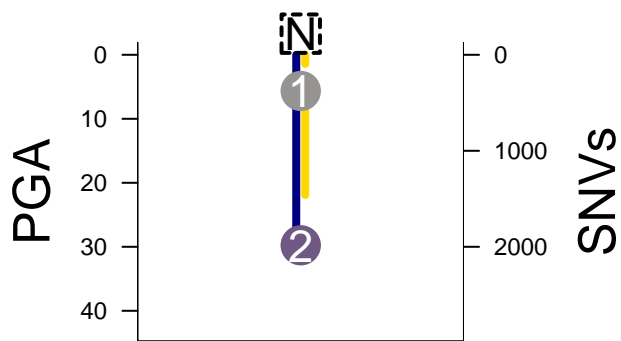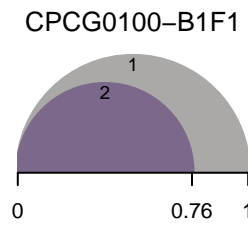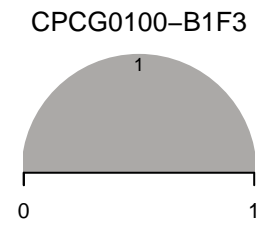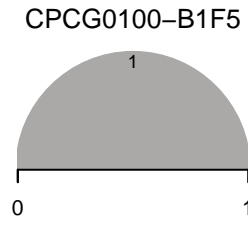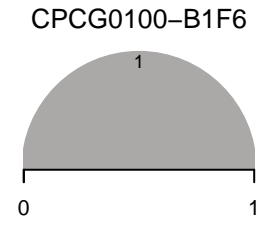



# CPCG0103-B1F1 MuTect-Battenberg

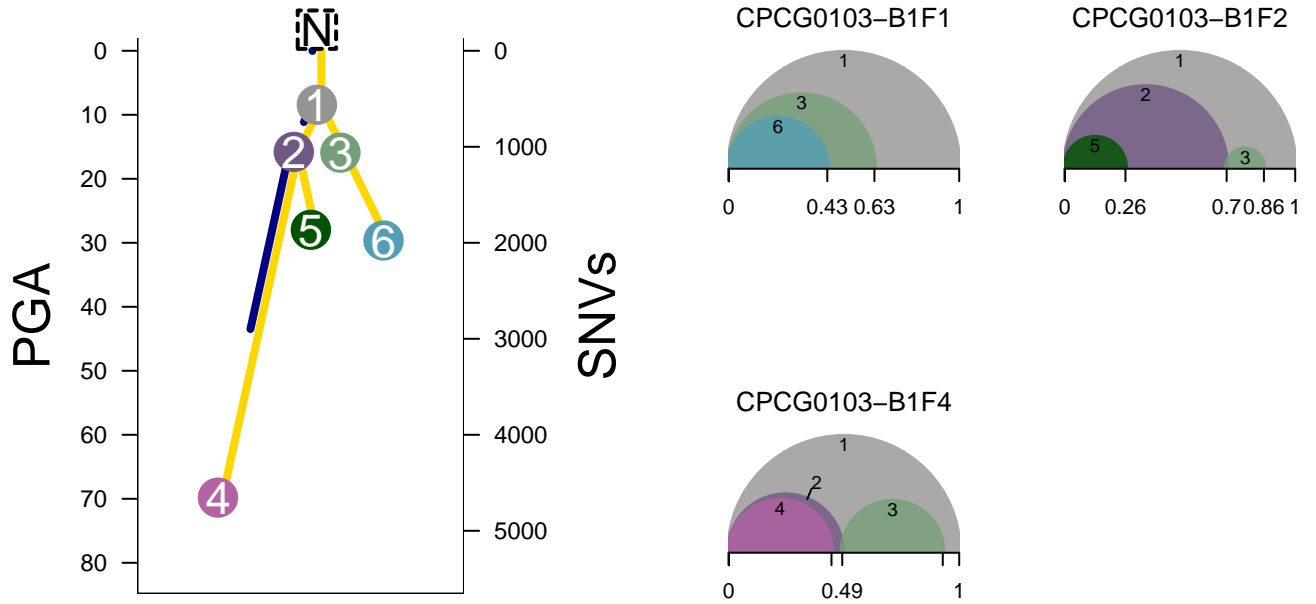

# CPCG0103-B1F1 MuTect-TITAN

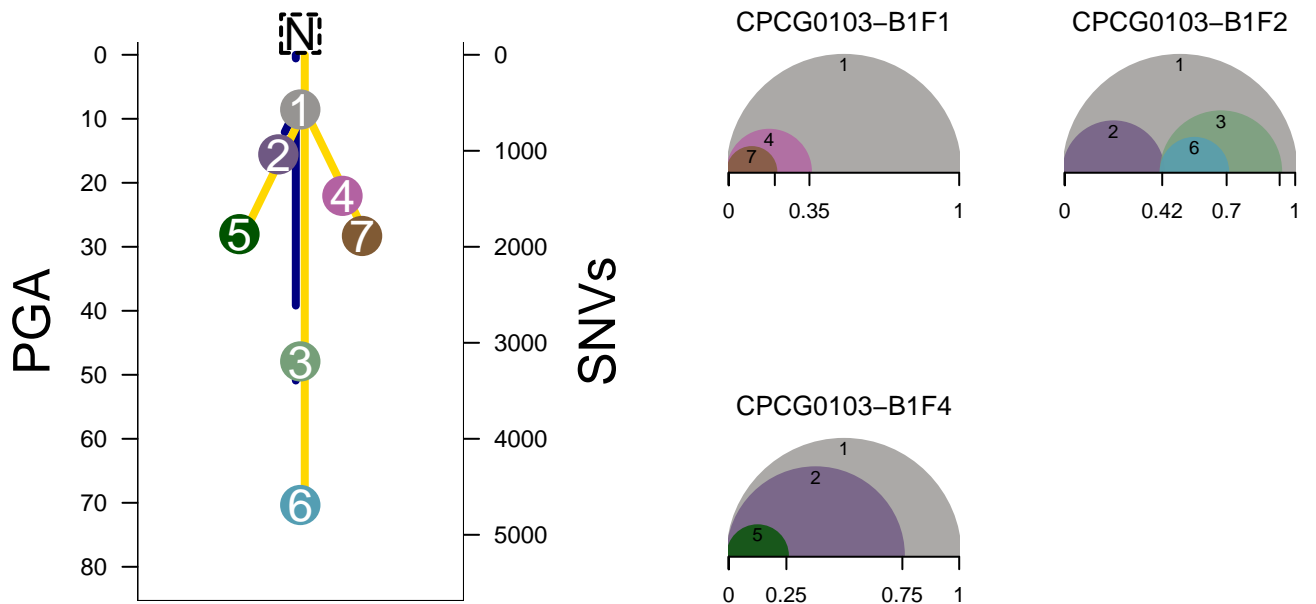

# CPCG0103-B1F1 SomaticSniper-Battenberg

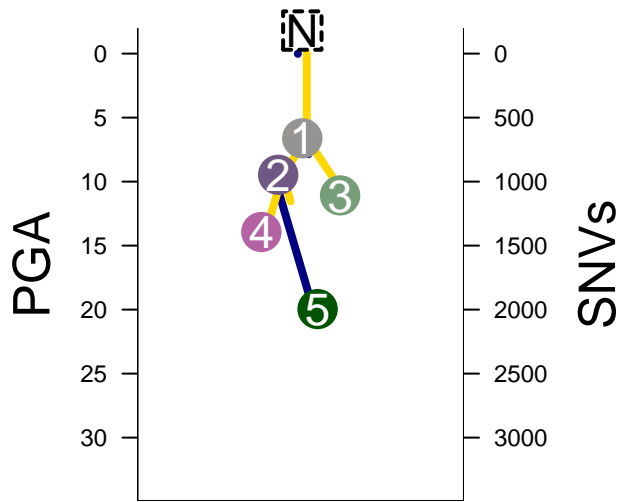

CPCG0103-B1F1

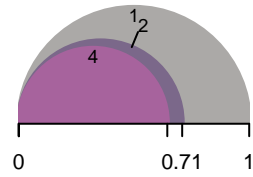

CPCG0103-B1F2

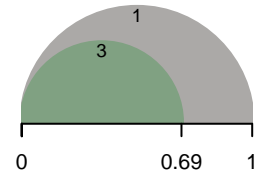

CPCG0103-B1F4

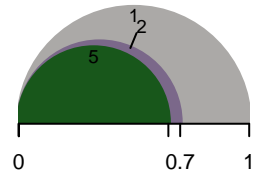

# CPCG0103-B1F1 SomaticSniper-TITAN

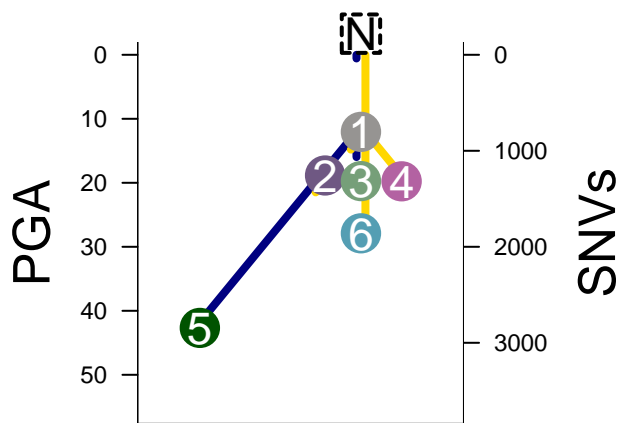

CPCG0103-B1F1

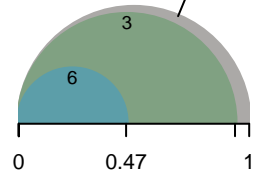

CPCG0103-B1F2

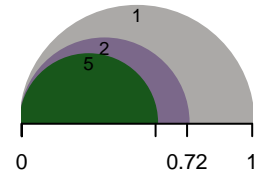

CPCG0103-B1F4

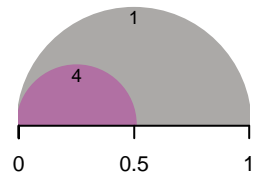

# CPCG0260-B1F1 MuTect-Battenberg

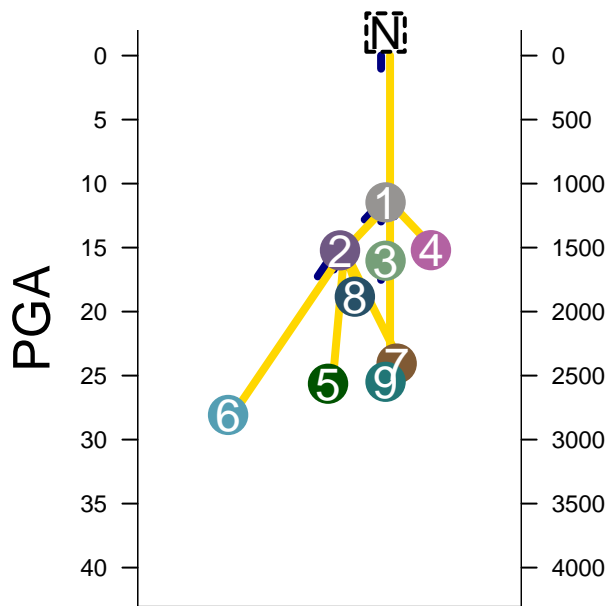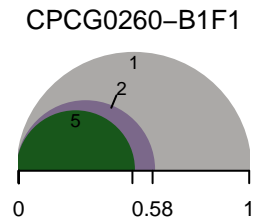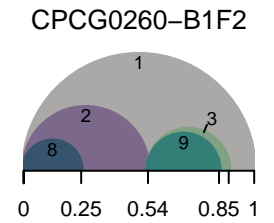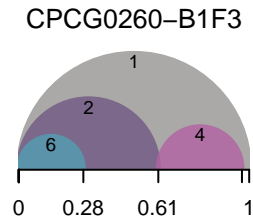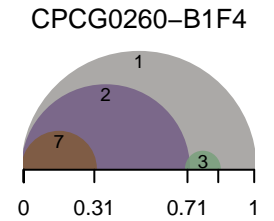

# CPCG0260-B1F1 MuTect-TITAN

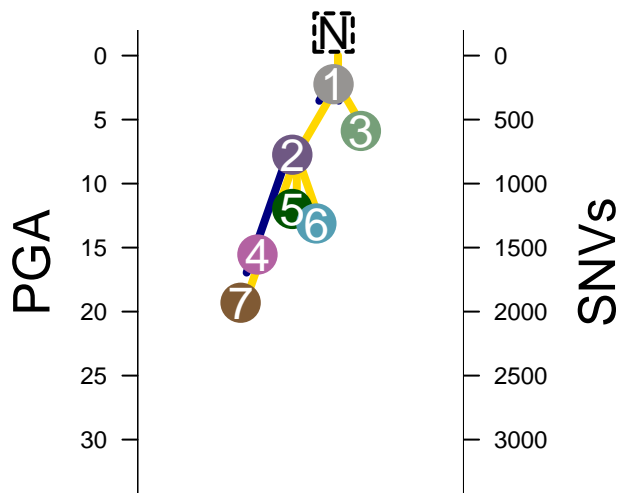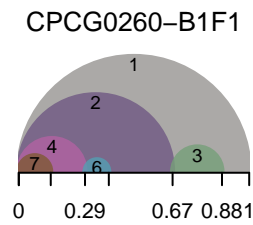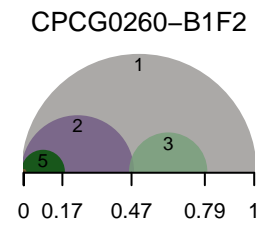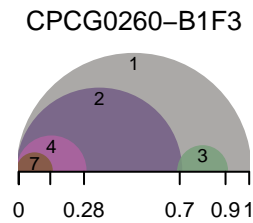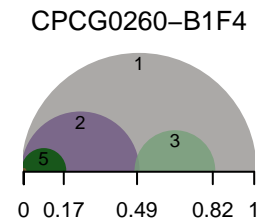

# CPCG0260-B1F1 SomaticSniper-Battenberg

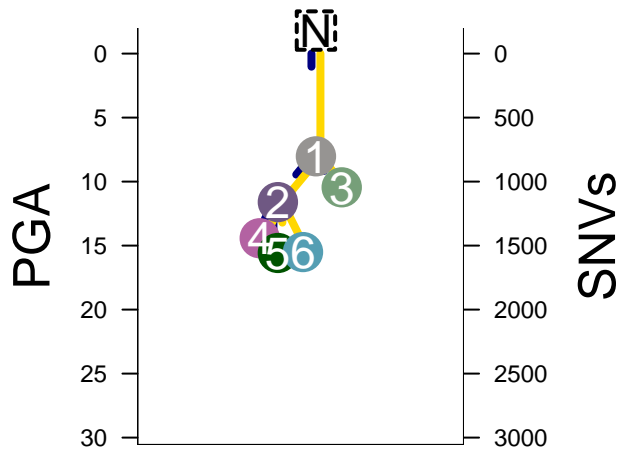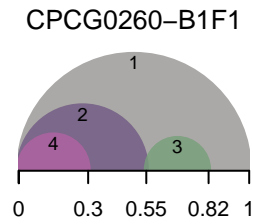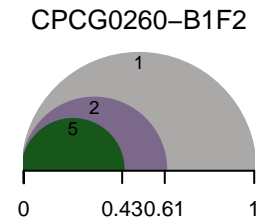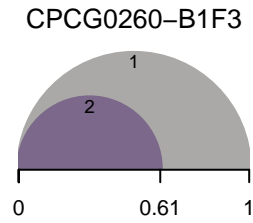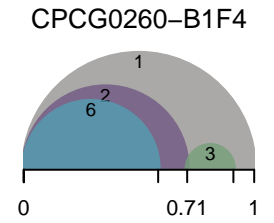

# CPCG0260-B1F1 SomaticSniper-TITAN

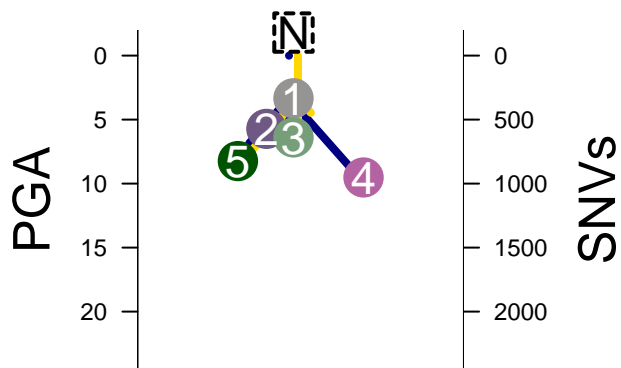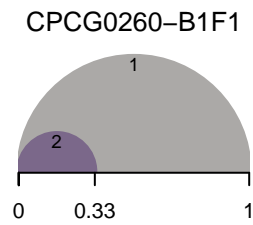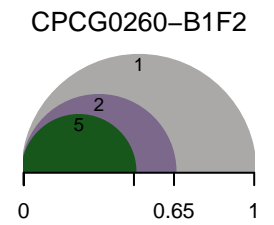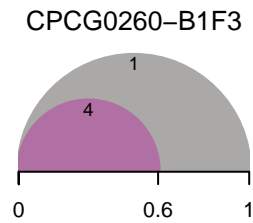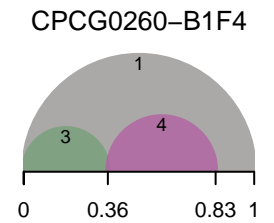

# CPCG0334-B1F1 MuTect-Battenberg

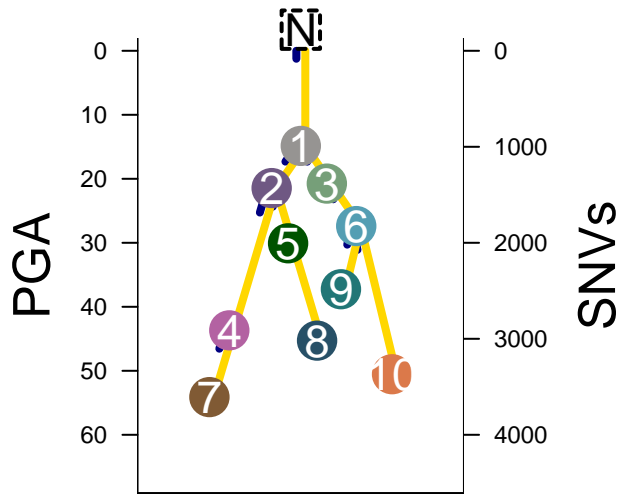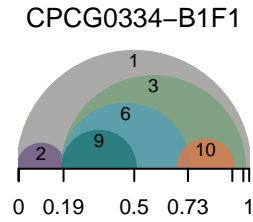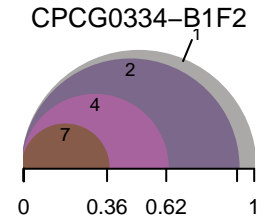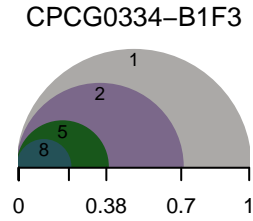

# CPCG0334-B1F1 MuTect-TITAN

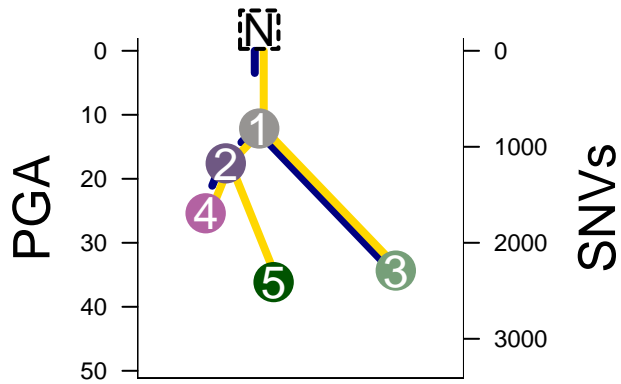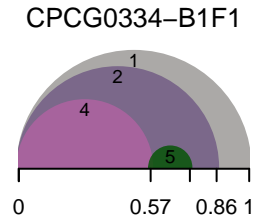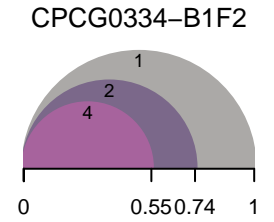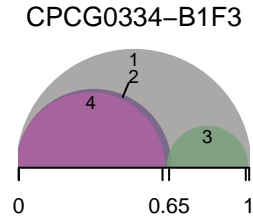

# CPCG0334-B1F1 SomaticSniper-Battenberg

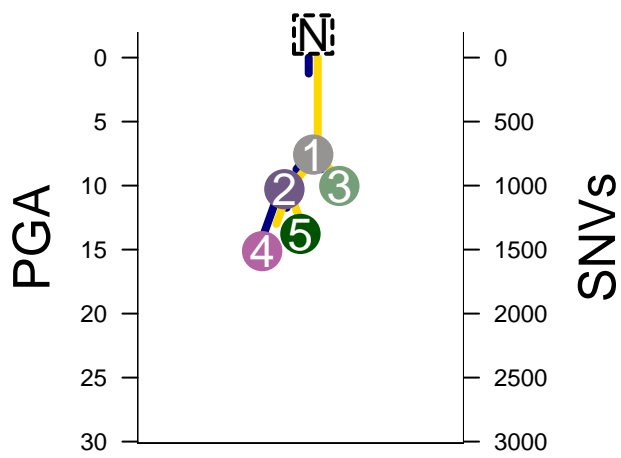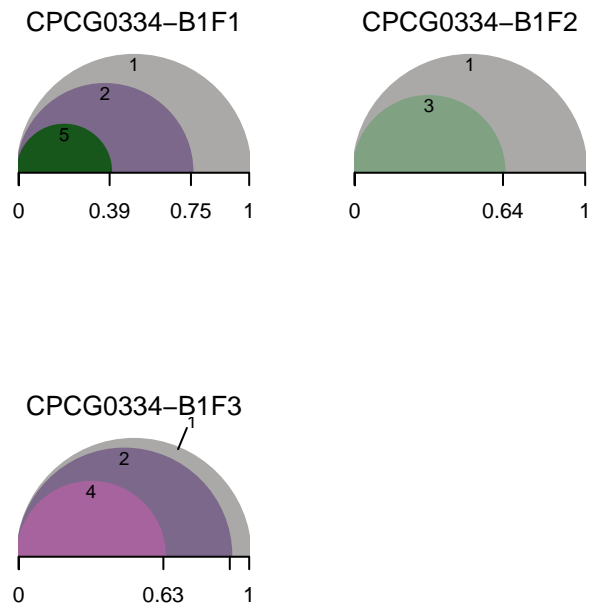

# CPCG0334-B1F1 SomaticSniper-TITAN

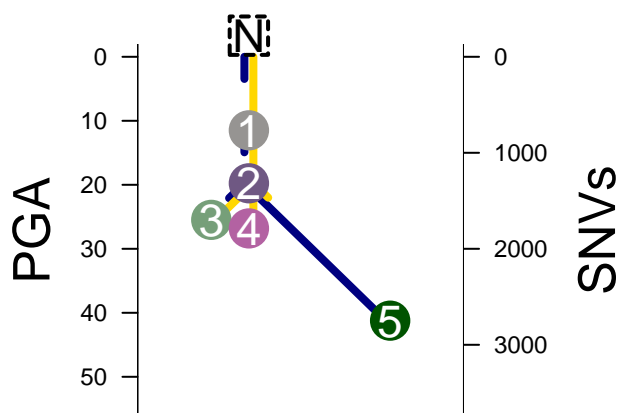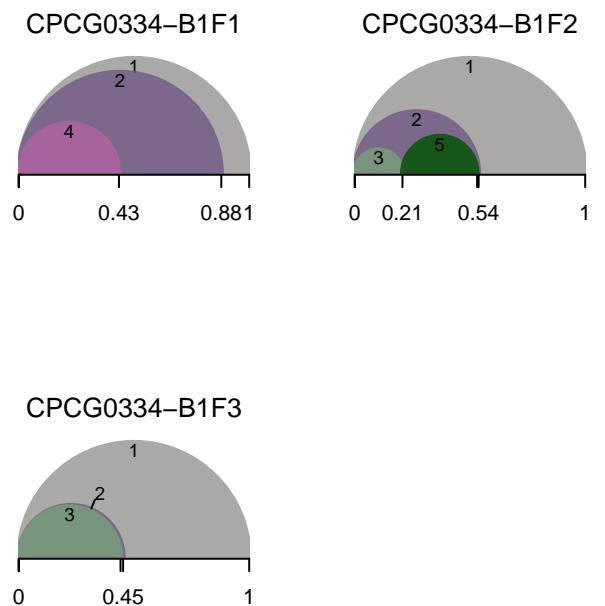

# CPCG0361-B1F1 MuTect-Battenberg

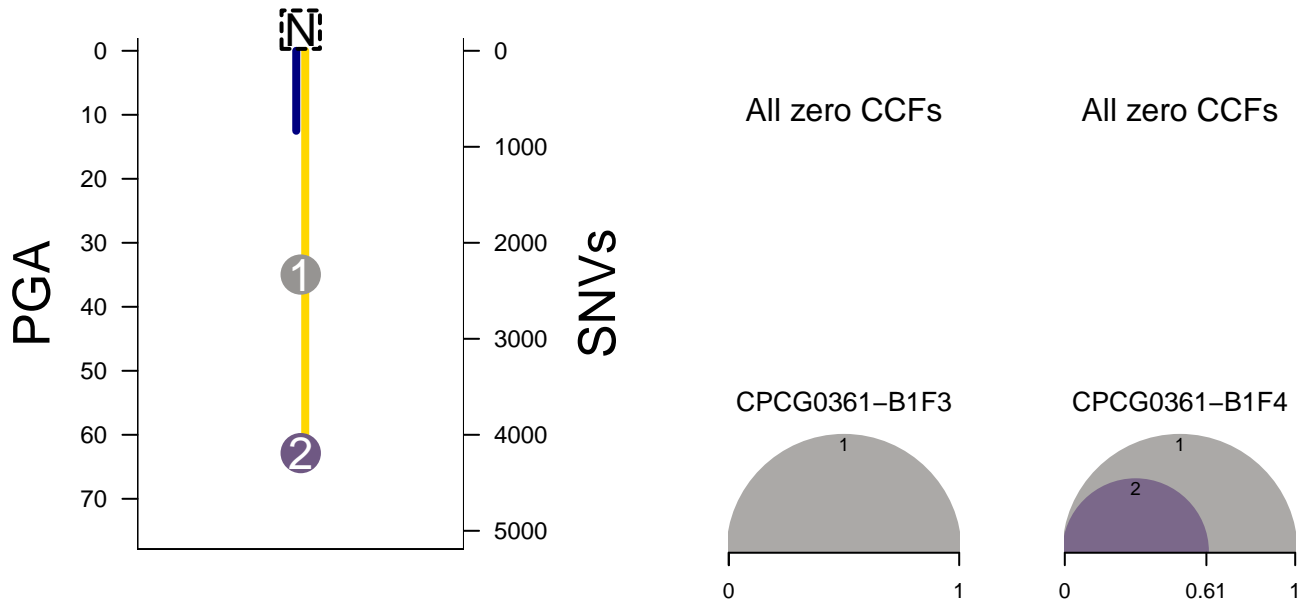

# CPCG0361-B1F1 MuTect-TITAN

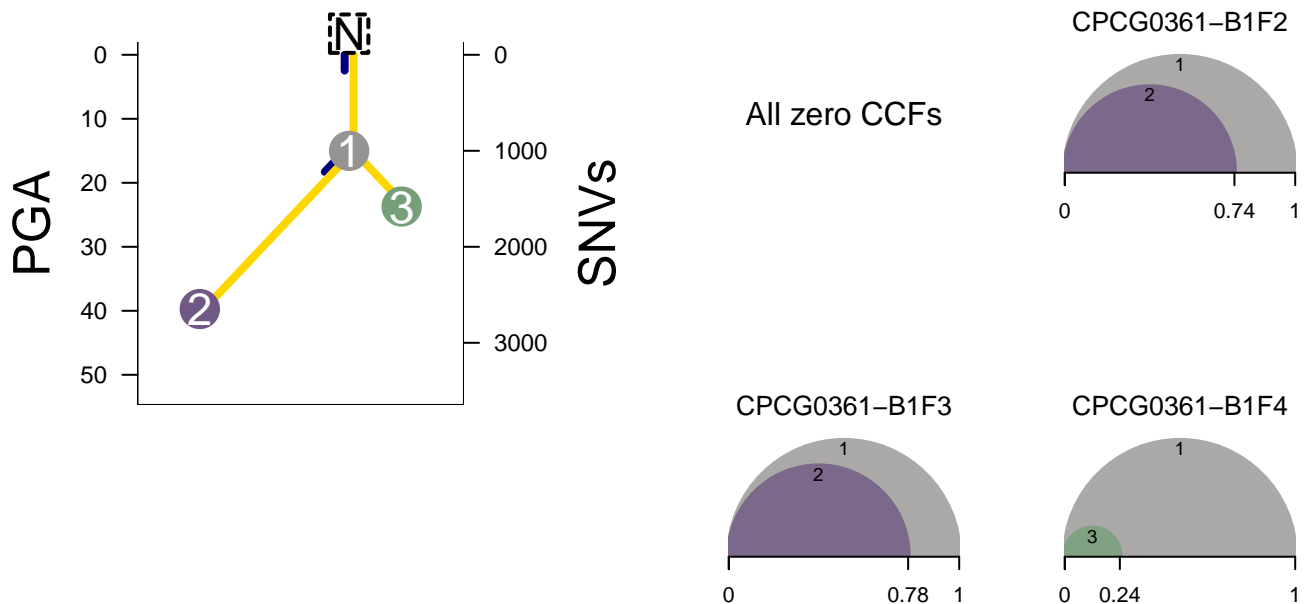

# CPCG0361-B1F1 SomaticSniper-Battenberg

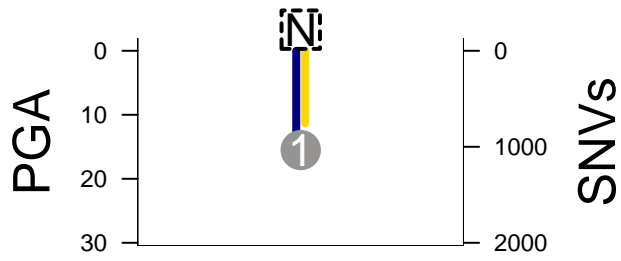

All zero CCFs

All zero CCFs

CPCG0361-B1F3

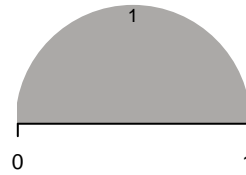

CPCG0361-B1F4

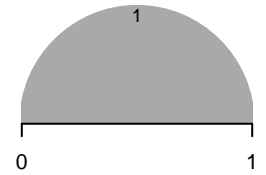

# CPCG0361-B1F1 SomaticSniper-TITAN

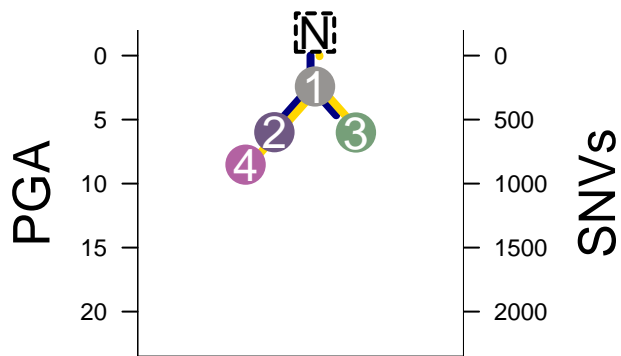

CPCG0361-B1F1

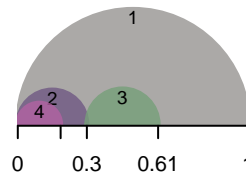

CPCG0361-B1F2

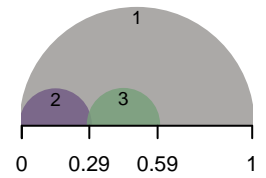

CPCG0361-B1F3

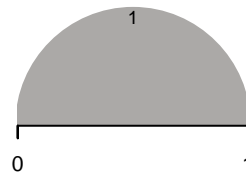

CPCG0361-B1F4

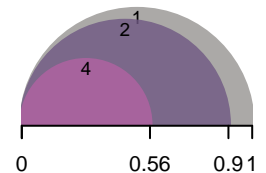



# CPCG0364-B1F1 MuTect-Battenberg

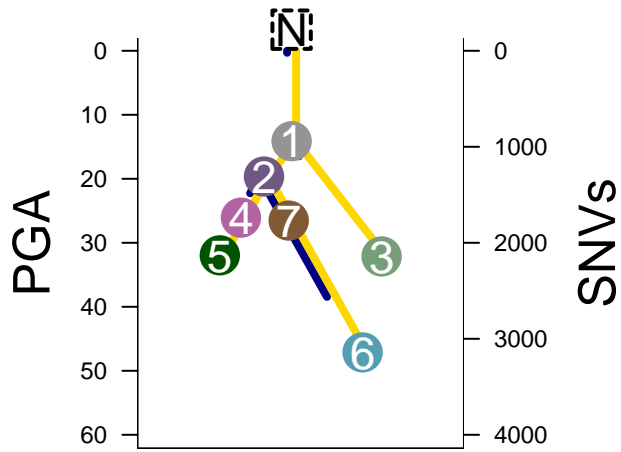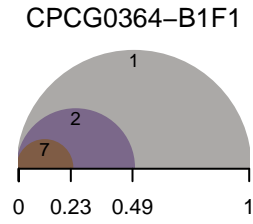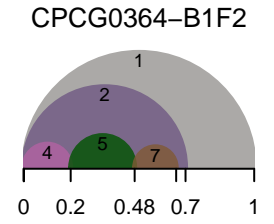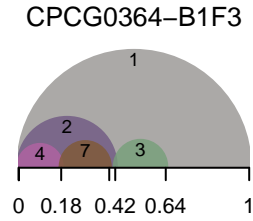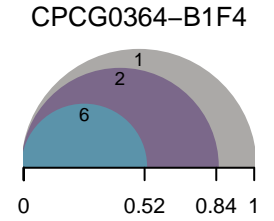

# CPCG0364-B1F1 MuTect-TITAN

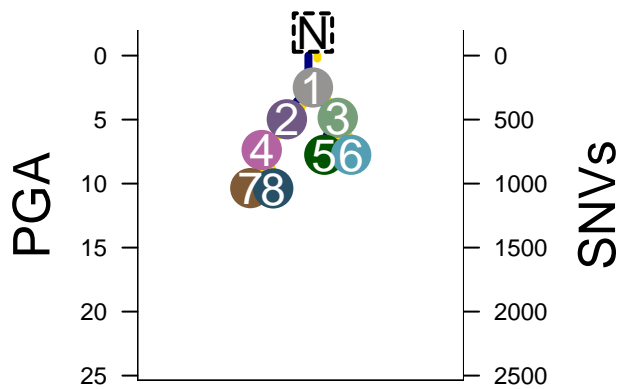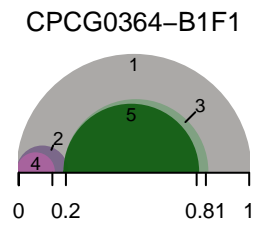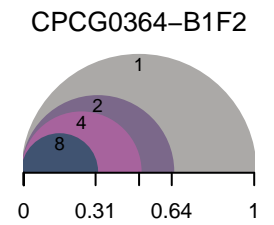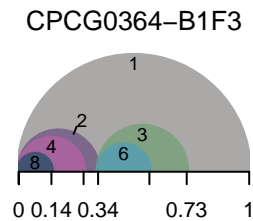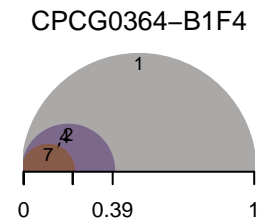

# CPCG0364-B1F1 SomaticSniper-Battenberg

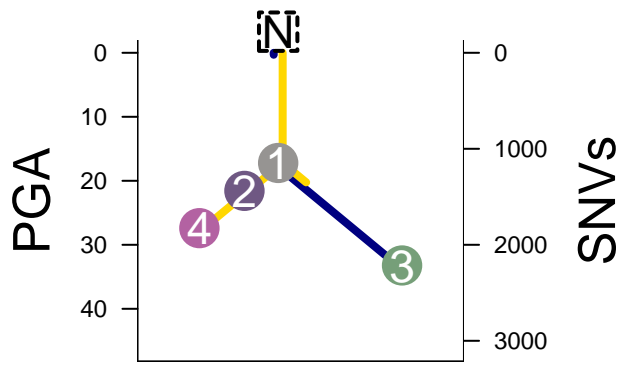

CPCG0364-B1F1

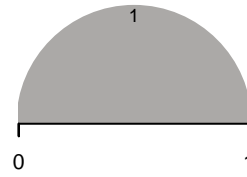

CPCG0364-B1F2

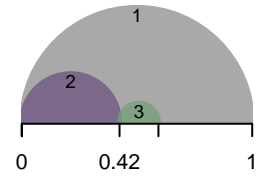

CPCG0364-B1F3

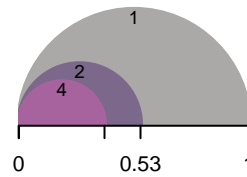

CPCG0364-B1F4

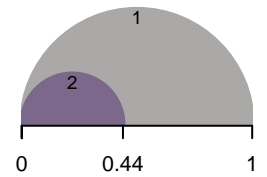

# CPCG0364-B1F1 SomaticSniper-TITAN

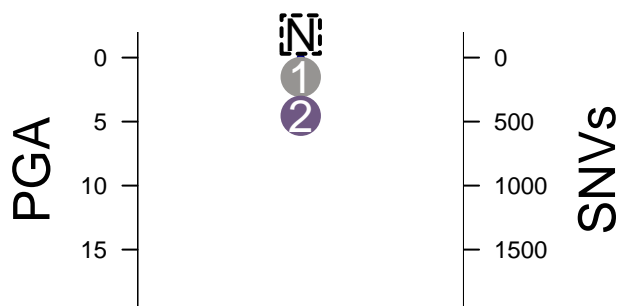

CPCG0364-B1F1

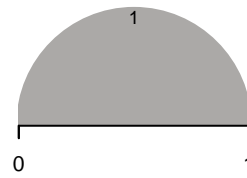

CPCG0364-B1F2

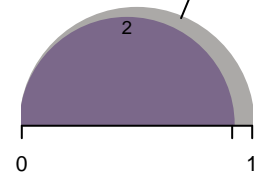

All zero CCFs

All zero CCFs

# CPCG9005-B1P1 MuTect-Battenberg

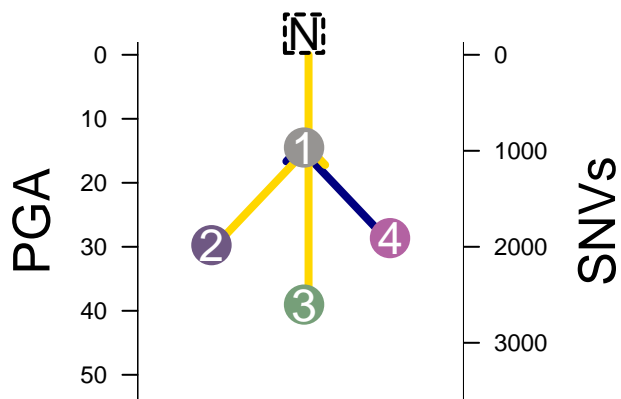

CPCG9005-B1P1

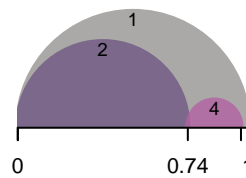

CPCG9005-B1P2

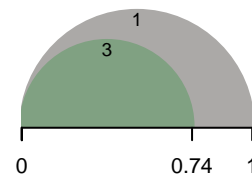

# CPCG9005-B1P1 MuTect-TITAN

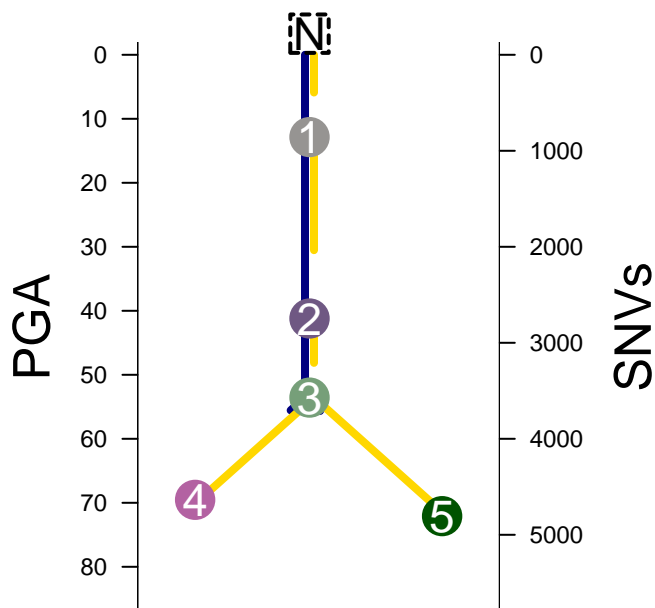

CPCG9005-B1P1

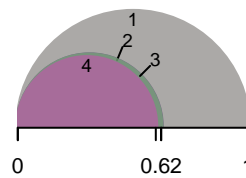

CPCG9005-B1P2

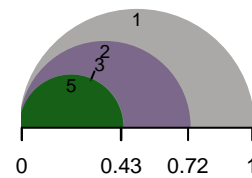

# CPCG9001-B1P1 MuTect-Battenberg

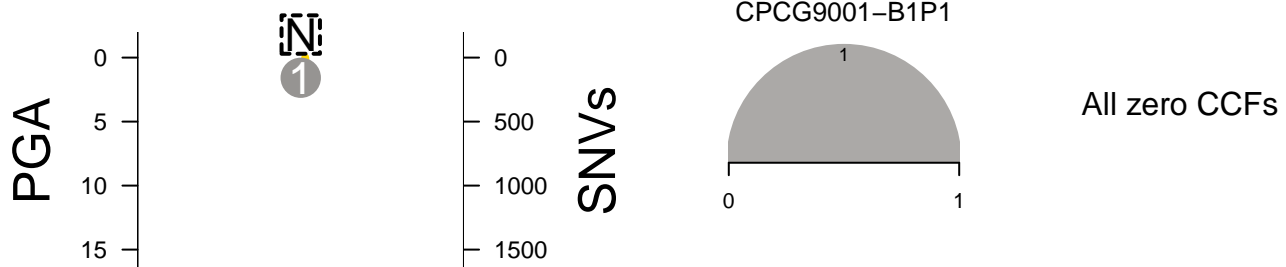

# CPCG9001-B1P1 MuTect-TITAN

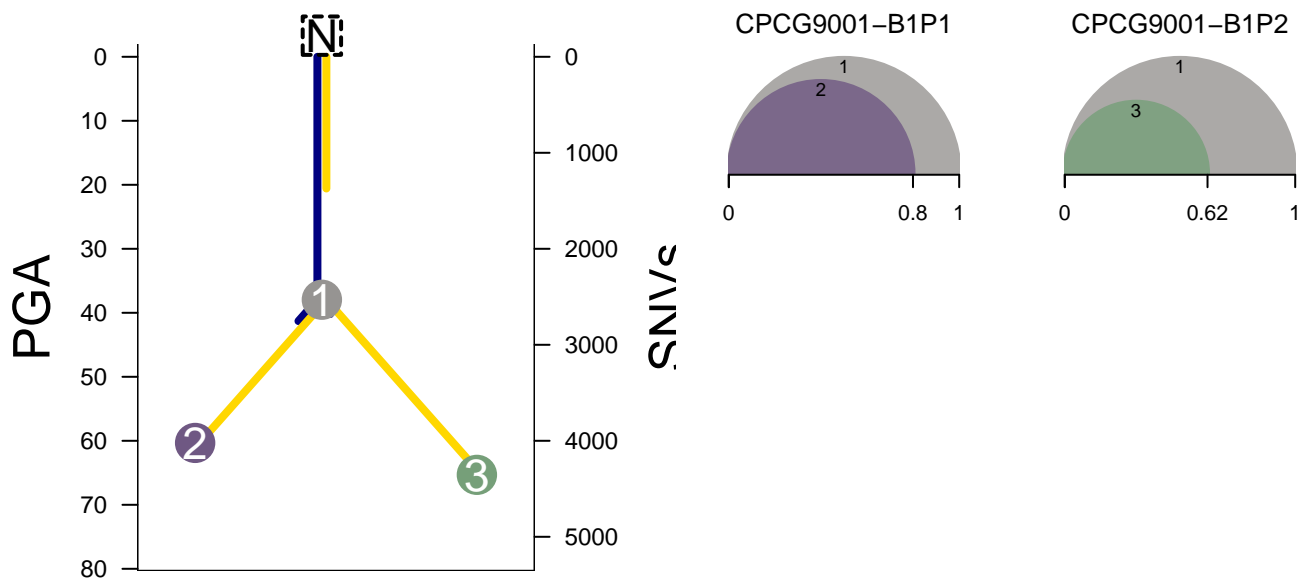

# CPCG9001-B1P1 SomaticSniper-TITAN

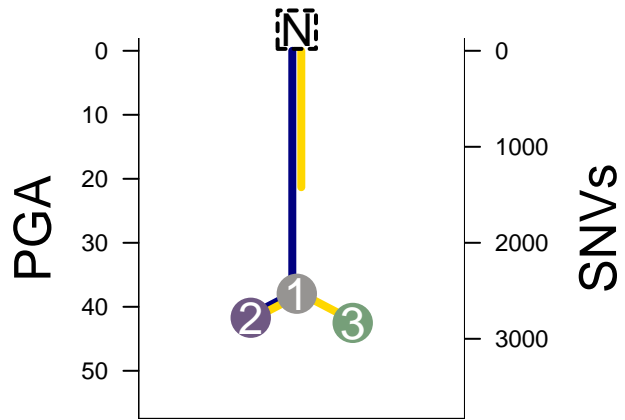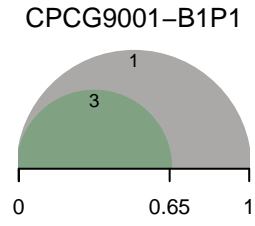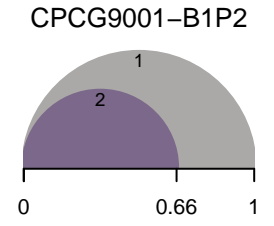

# CPCG9002-B1P1 MuTect-Battenberg

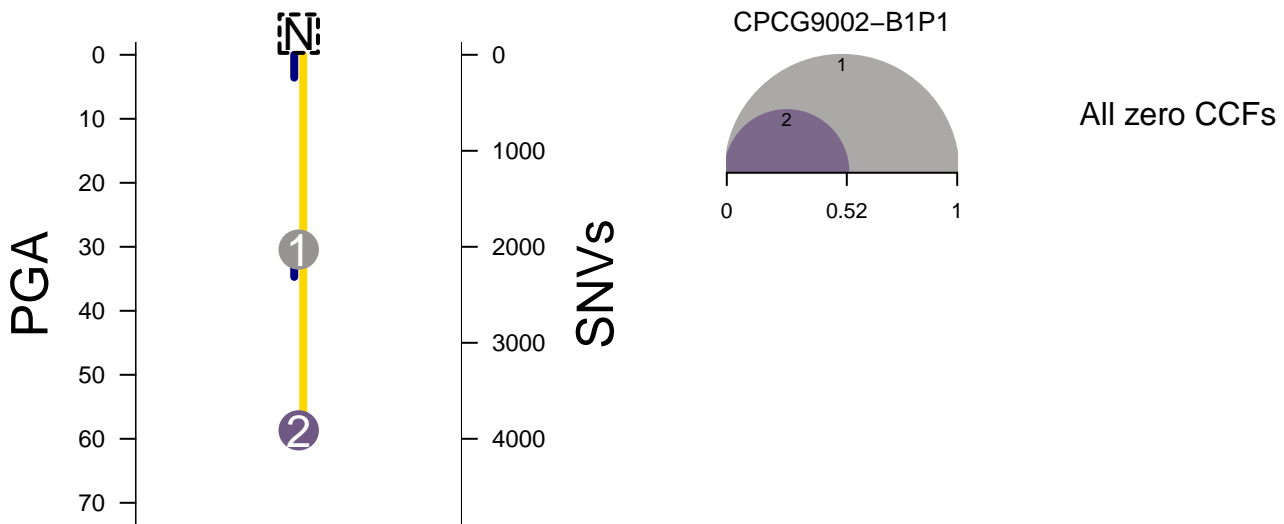

# CPCG9002-B1P1 MuTect-TITAN

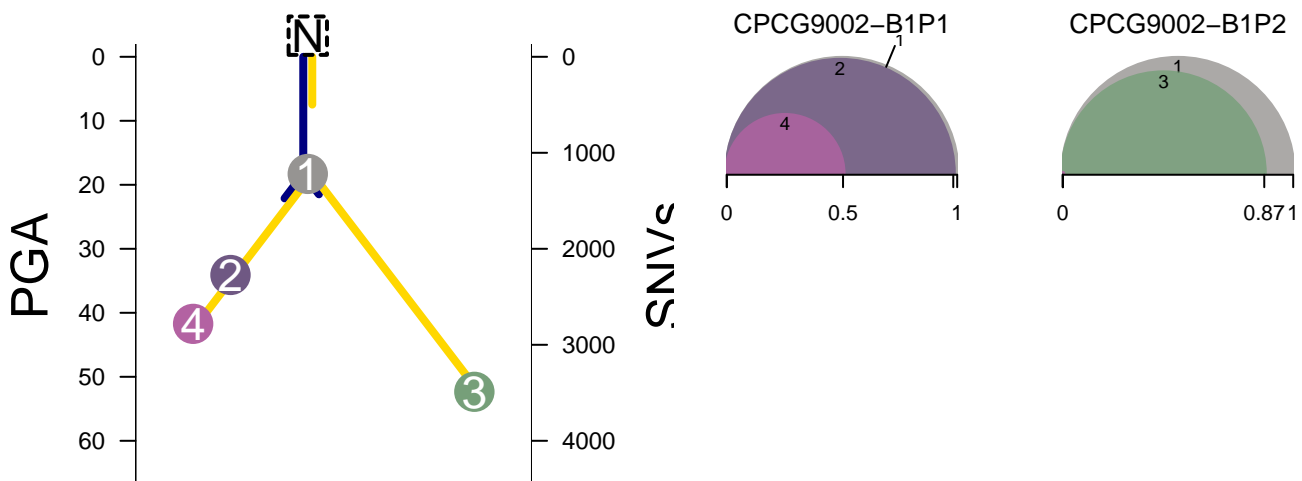

# CPCG9002-B1P1 SomaticSniper-Battenberg

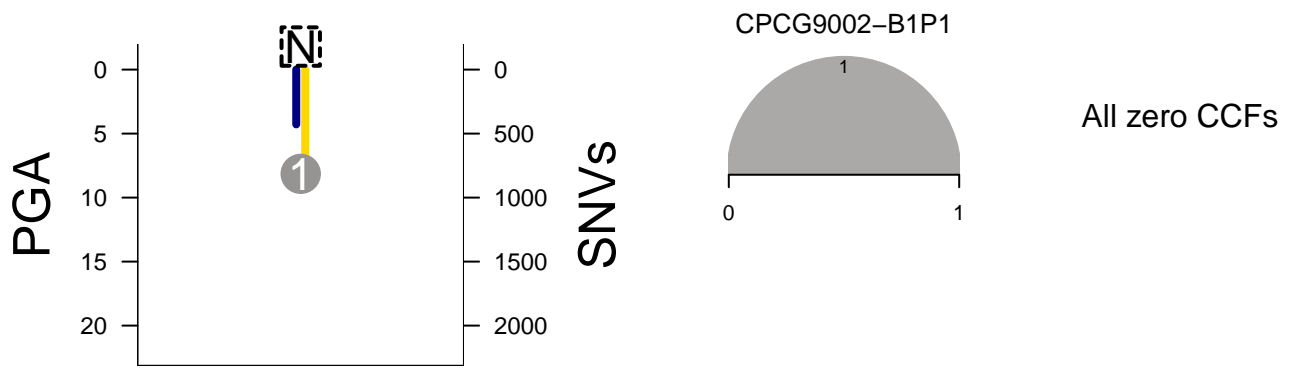

# CPCG9002-B1P1 SomaticSniper-TITAN

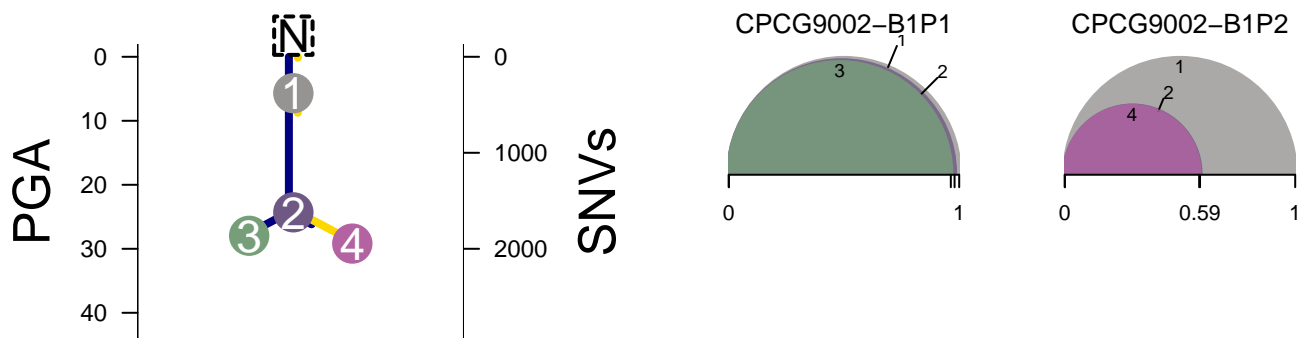

# CPCG9003-B1P1 MuTect-Battenberg

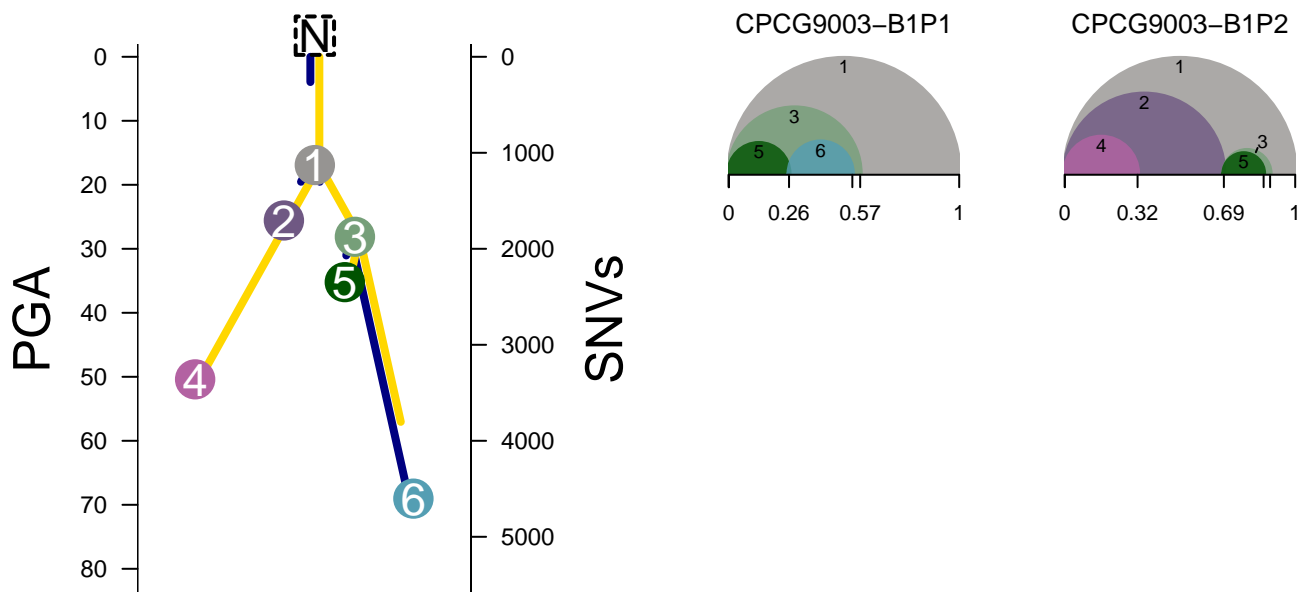

# CPCG9003-B1P1 MuTect-TITAN

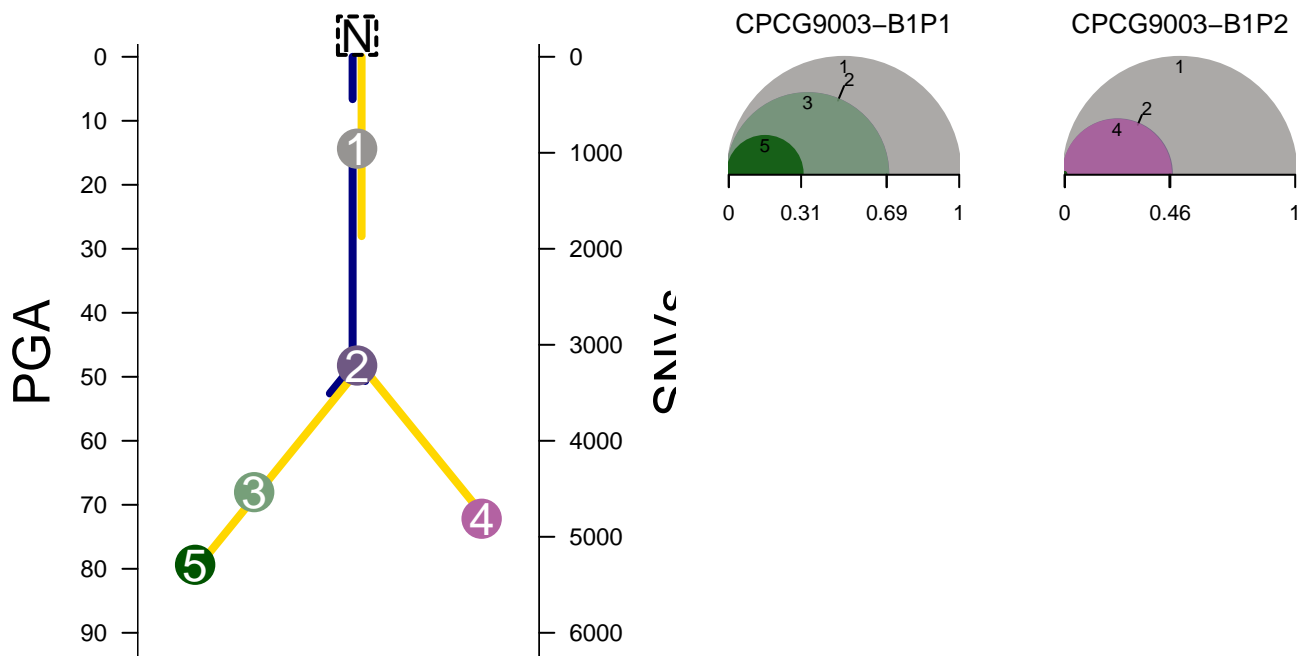



# CPCG9003-B1P1 SomaticSniper-Battenberg

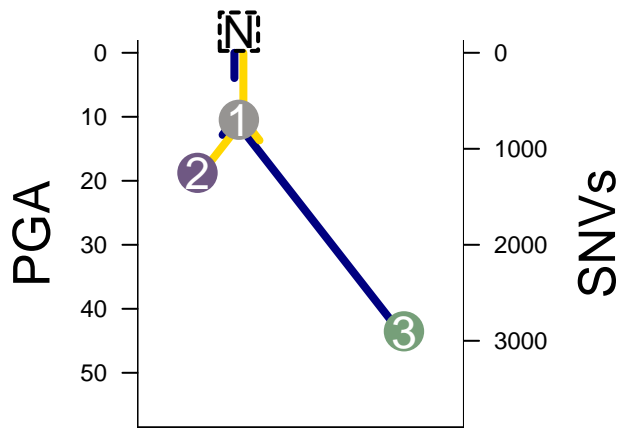

CPCG9003-B1P1

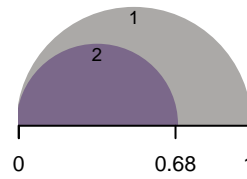

CPCG9003-B1P2

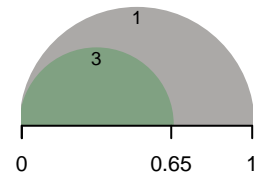

# CPCG9003-B1P1 SomaticSniper-TITAN

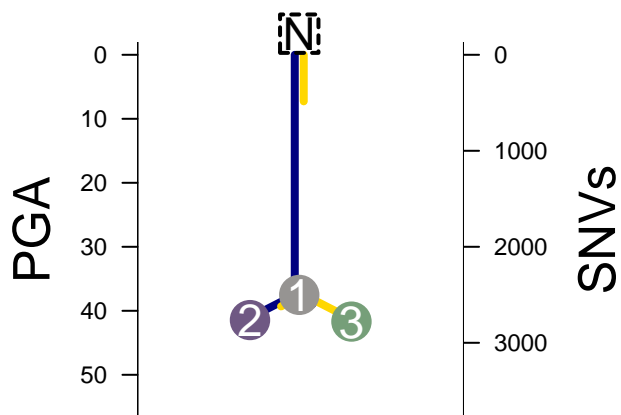

CPCG9003-B1P1

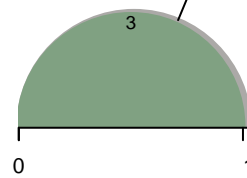

CPCG9003-B1P2

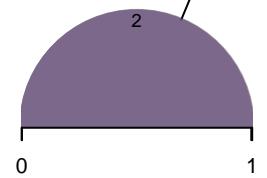

# CPCG9005-B1P1 MuTect-Battenberg

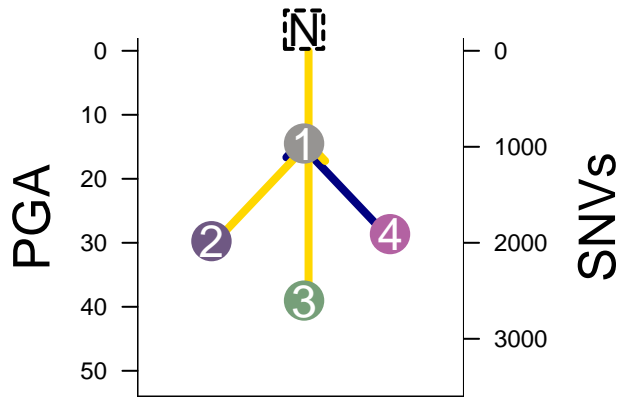

CPCG9005-B1P1

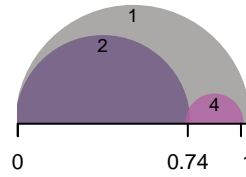

CPCG9005-B1P2

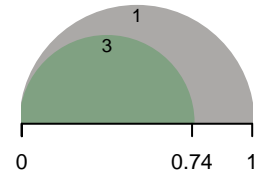

# CPCG9005-B1P1 MuTect-TITAN

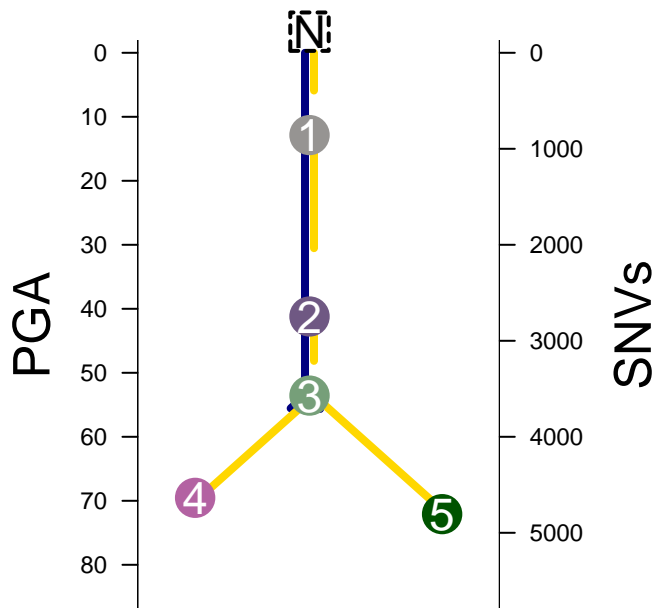

CPCG9005-B1P1

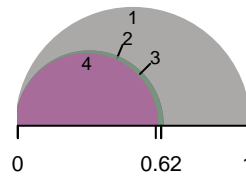

CPCG9005-B1P2

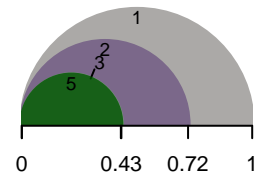

# CPCG9005-B1P1 SomaticSniper-Battenberg

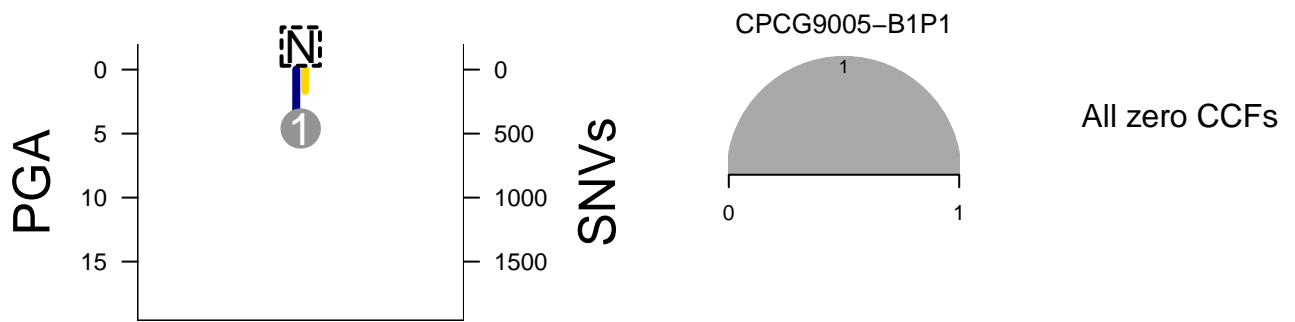

# CPCG9005-B1P1 SomaticSniper-TITAN

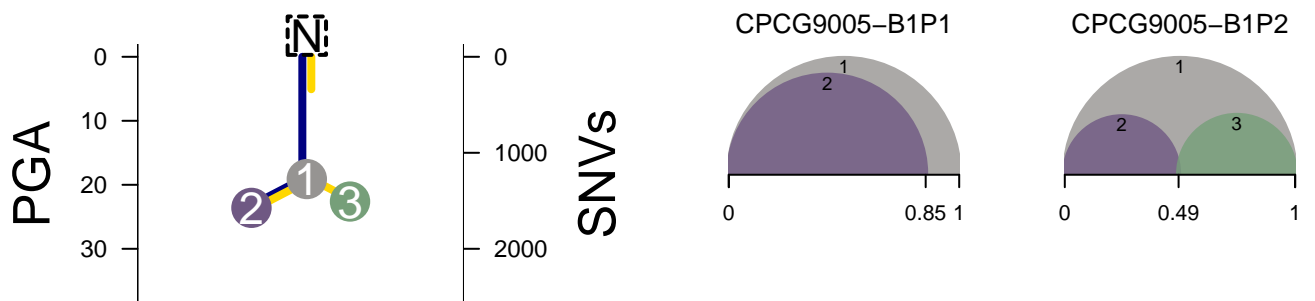

Supplement: Supplementary file [file 418780-11.pdf]
